# Supplementary material for: A Wavelet‐Based Learning Model Enhances Molecular Prognosis in Pancreatic Adenocarcinoma
Source: Hindawi journal article supplement (doi:10.1155/2021/7865856), 2021-01-01
Supplement: f1 [file 7865856.f1.zip]

## Additional file 1

**Table 1.** The comparison results of PAAD dataset on the proposed method, classic LASSO and previous wavelet-based methods with diverse predictors

|               | Wavelet function | AUC at 3 years | AUC at 5 years | gene number |
|---------------|------------------|----------------|----------------|-------------|
| <b>db</b>     | db2              | 0.707          | 0.825          | 7           |
|               | db3              | 0.707          | 0.825          | 7           |
|               | db4              | 0.707          | 0.825          | 7           |
|               | db5              | 0.787          | 0.845          | 6           |
|               | db6              | 0.799          | 0.866          | 6           |
|               | db7              | 0.804          | 0.867          | 5           |
|               | db8              | 0.707          | 0.825          | 5           |
| <b>bior</b>   | bior1.1          | 0.797          | 0.858          | 5           |
|               | bior1.3          | 0.769          | 0.838          | 6           |
|               | bior1.5          | 0.787          | 0.937          | 5           |
|               | bior2.2          | 0.681          | 0.809          | 4           |
|               | bior2.4          | 0.736          | 0.857          | 8           |
|               | bior2.6          | 0.707          | 0.790          | 6           |
|               | bior2.8          | 0.729          | 0.724          | 8           |
|               | bior3.1          | 0.761          | 0.908          | 7           |
|               | bior3.3          | 0.760          | 0.908          | 7           |
|               | bior3.5          | 0.760          | 0.890          | 6           |
|               | bior3.7          | 0.691          | 0.800          | 5           |
|               | bior3.9          | 0.732          | 0.857          | 6           |
|               | bior4.4          | 0.751          | 0.839          | 4           |
|               | bior5.5          | 0.795          | 0.881          | 8           |
|               | bior6.8          | 0.697          | 0.792          | 6           |
| <b>sym</b>    | sym2             | 0.749          | 0.873          | 8           |
|               | sym3             | 0.806          | 0.904          | 5           |
|               | sym4             | 0.691          | 0.756          | 7           |
|               | sym5             | 0.767          | 0.855          | 5           |
|               | sym6             | 0.658          | 0.837          | 5           |
|               | sym7             | 0.788          | 0.825          | 6           |
|               | sym8             | 0.787          | 0.845          | 7           |
| <b>coif</b>   | coif2            | 0.700          | 0.785          | 9           |
|               | coif3            | 0.775          | 0.745          | 6           |
|               | coif4            | 0.696          | 0.788          | 5           |
|               | coif5            | 0.700          | 0.785          | 9           |
| <b>haar</b>   |                  | 0.618          | 0.756          | 5           |
| <b>dmeyer</b> |                  | 0.823          | 0.869          | 7           |
|               | rbio1.1          | 0.759          | 0.826          | 11          |
|               | rbio1.3          | 0.726          | 0.734          | 5           |

|                |         |       |       |    |
|----------------|---------|-------|-------|----|
| <b>rbio</b>    | rbio1.5 | 0.766 | 0.827 | 8  |
|                | rbio2.2 | 0.823 | 0.884 | 7  |
|                | rbio2.4 | 0.799 | 0.894 | 9  |
|                | rbio2.6 | 0.790 | 0.894 | 9  |
|                | rbio2.8 | 0.852 | 0.897 | 10 |
|                | rbio3.1 | 0.812 | 0.834 | 9  |
|                | rbio3.3 | 0.595 | 0.719 | 6  |
|                | rbio3.5 | 0.749 | 0.774 | 7  |
|                | rbio3.7 | 0.783 | 0.858 | 8  |
|                | rbio3.9 | 0.693 | 0.725 | 6  |
|                | rbio4.4 | 0.795 | 0.824 | 7  |
|                | rbio5.5 | 0.762 | 0.760 | 10 |
|                | rbio6.8 | 0.784 | 0.817 | 7  |
| <b>fk</b>      | fk4     | 0.687 | 0.873 | 6  |
|                | fk6     | 0.681 | 0.859 | 7  |
|                | fk8     | 0.682 | 0.827 | 4  |
|                | fk14    | 0.672 | 0.861 | 5  |
|                | fk18    | 0.689 | 0.792 | 7  |
|                | fk22    | 0.733 | 0.856 | 8  |
| <b>SWT-CNN</b> | sym4    | 0.721 | 0.859 | 8  |
| <b>LASSO</b>   |         | 0.782 | 0.802 | 11 |

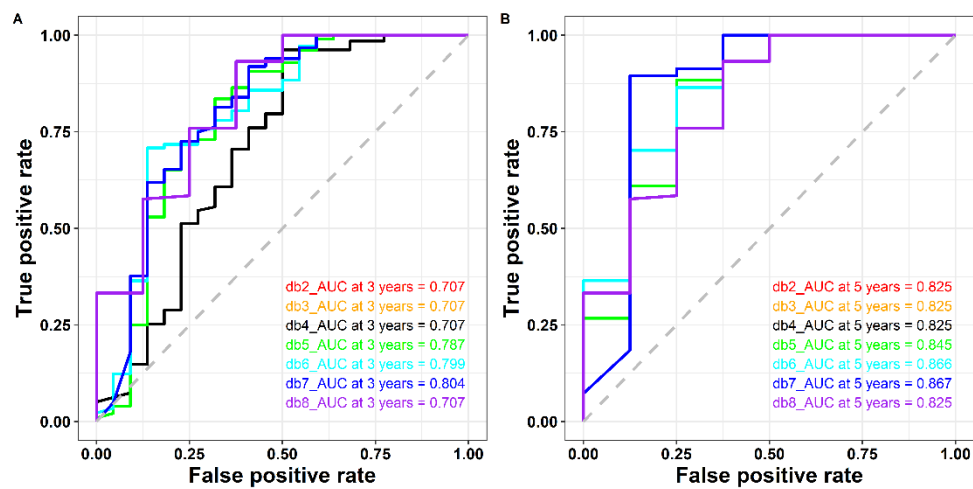

**Figure 1.** The performance of PAAD dataset on db basis function.

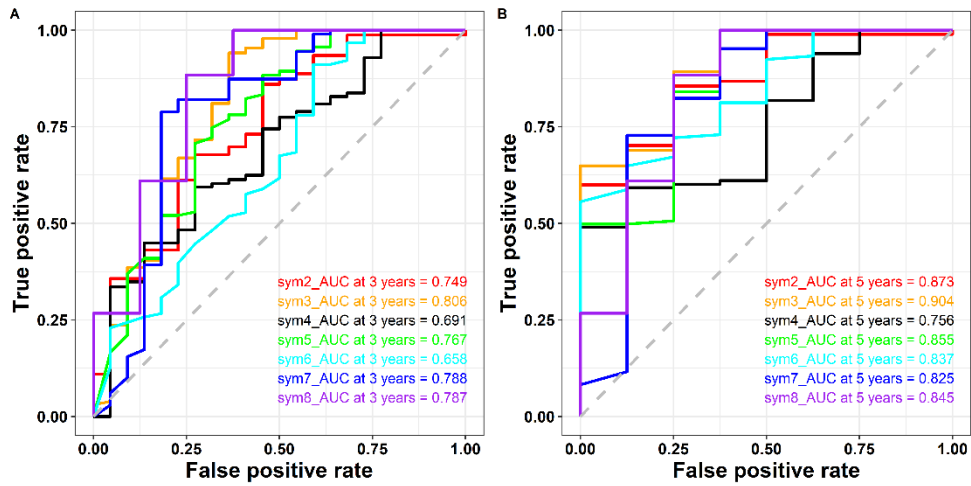

**Figure 2.** The performance of PAAD dataset on sym basis function.

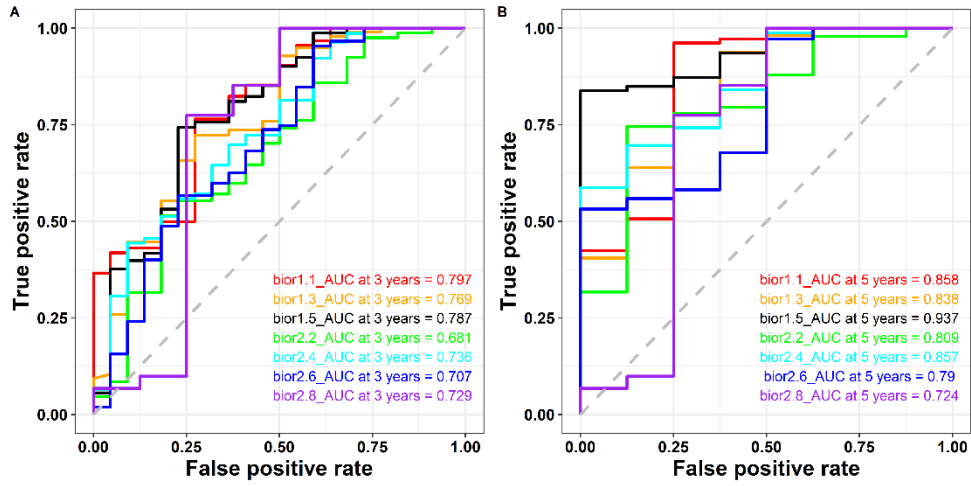

**Figure 3.** The performance of PAAD dataset on bior basis function (bior1.1~bior2.8).

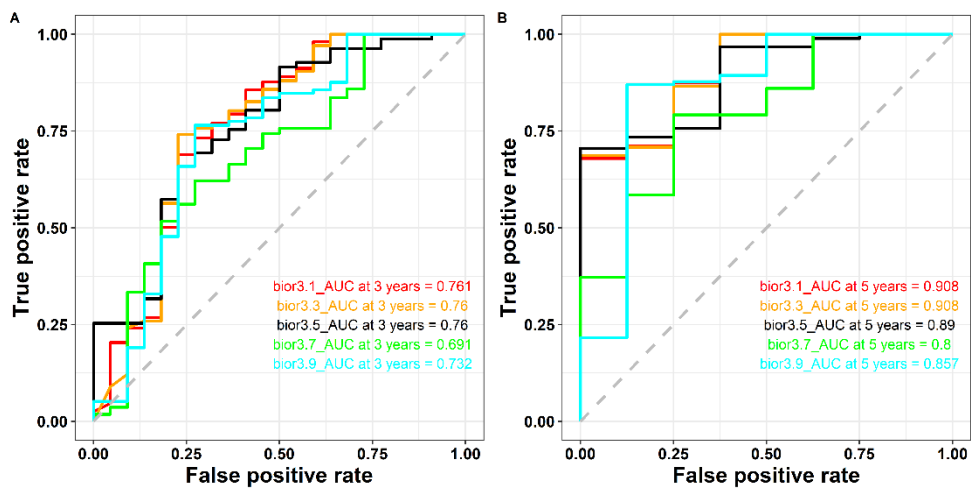

**Figure 4.** The performance of PAAD dataset on bior basis function (bior3.1~bior3.9).

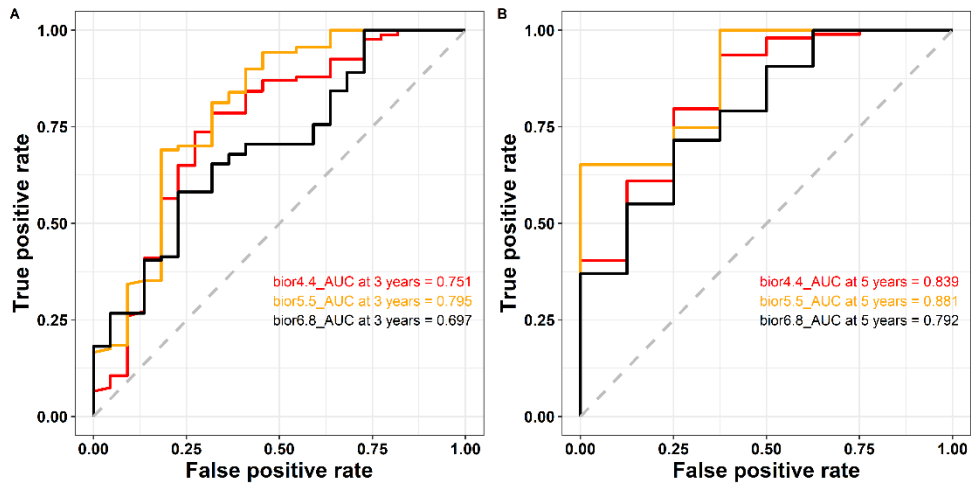

**Figure 5.** The performance of PAAD dataset on bior basis function (bior4.4~bior6.8).

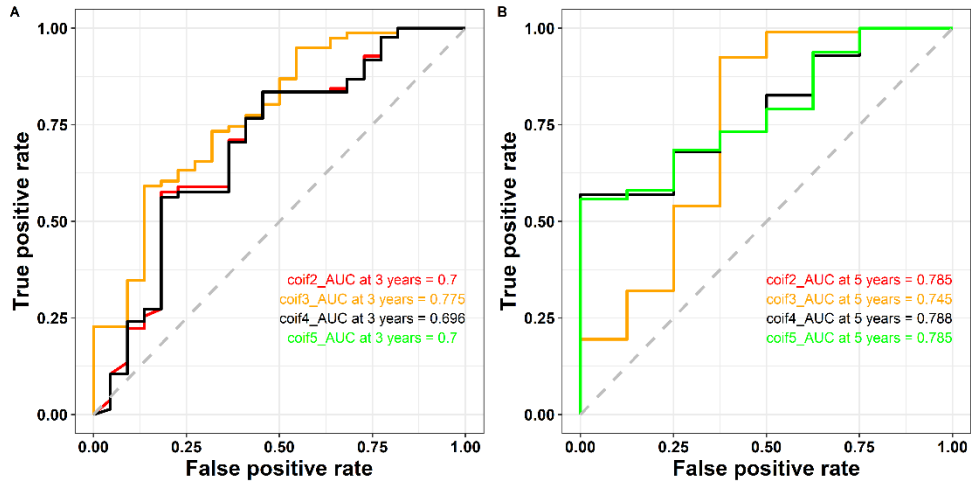

**Figure 6.** The performance of PAAD dataset on coif basis function.

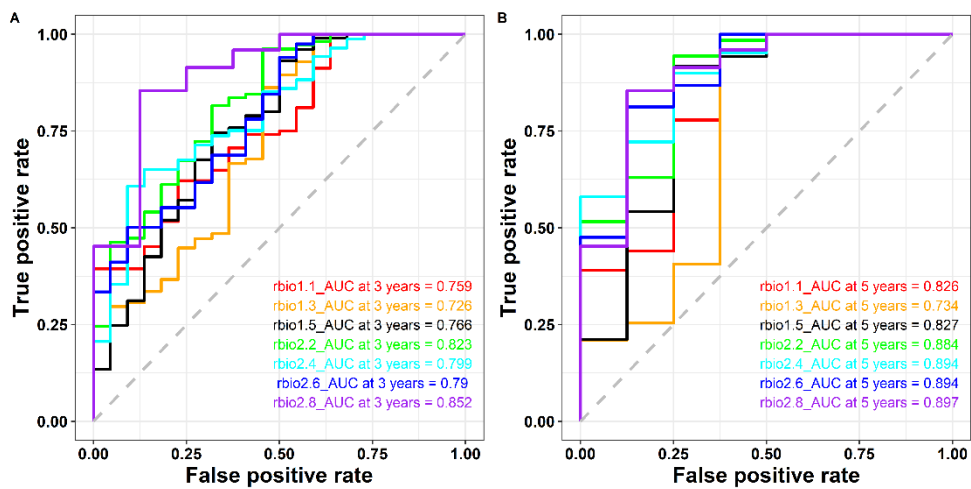

**Figure 7.** The performance of PAAD dataset on rbio basis function (rbio1.1~rbio2.8).

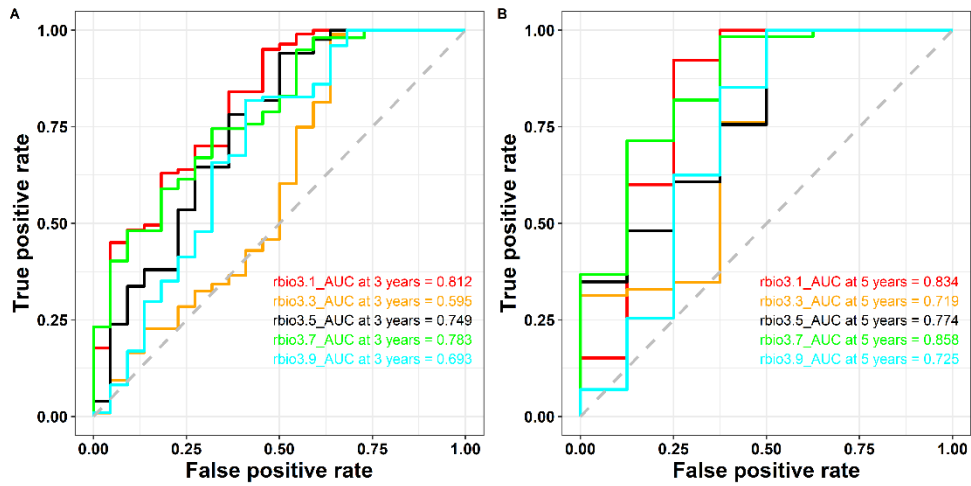

**Figure 8.** The performance of PAAD dataset on rbio basis function (rbio3.1~rbio3.9).

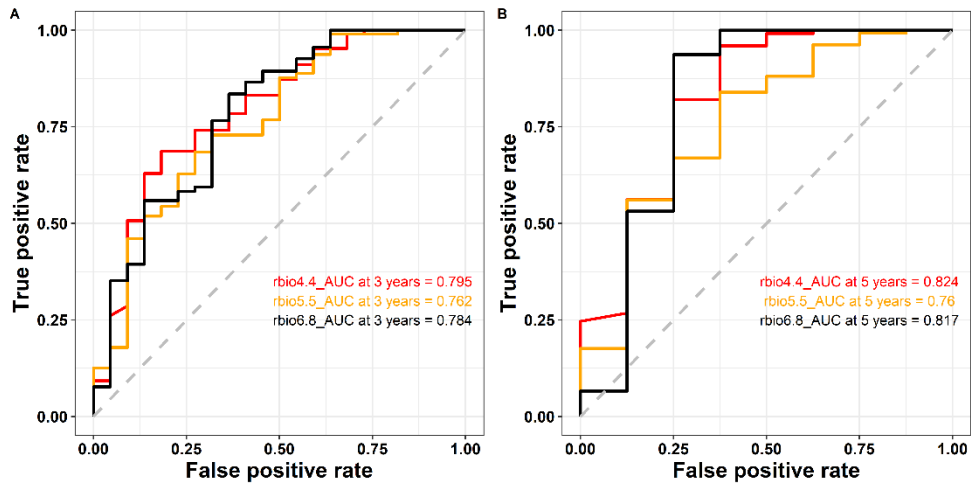

**Figure 9.** The performance of PAAD dataset on rbio basis function (rbio4.4~rbio6.8).

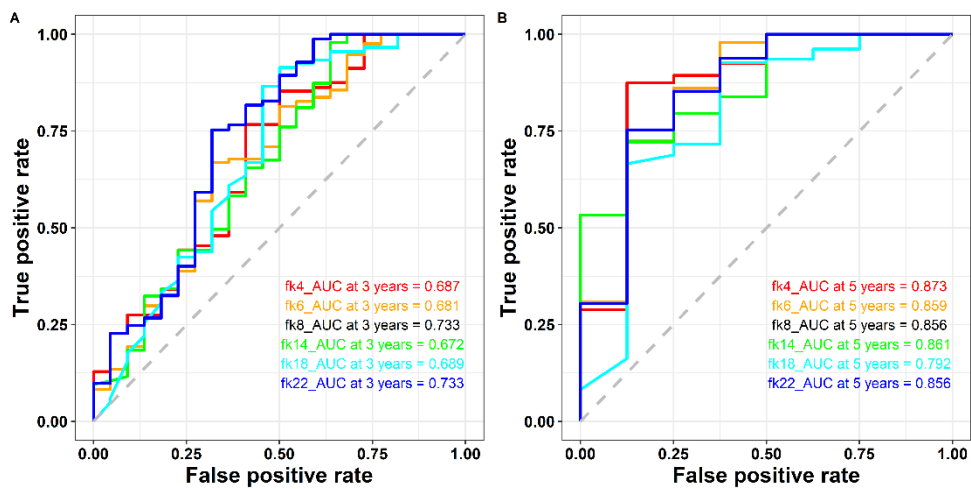

**Figure 10.** The performance of PAAD dataset on fk basis function.

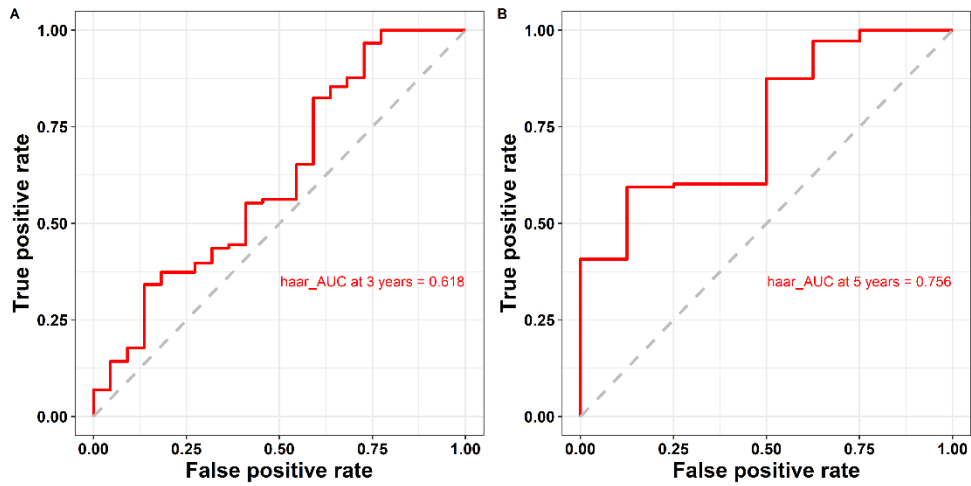

**Figure 11.** The performance of PAAD dataset on haar basis function.

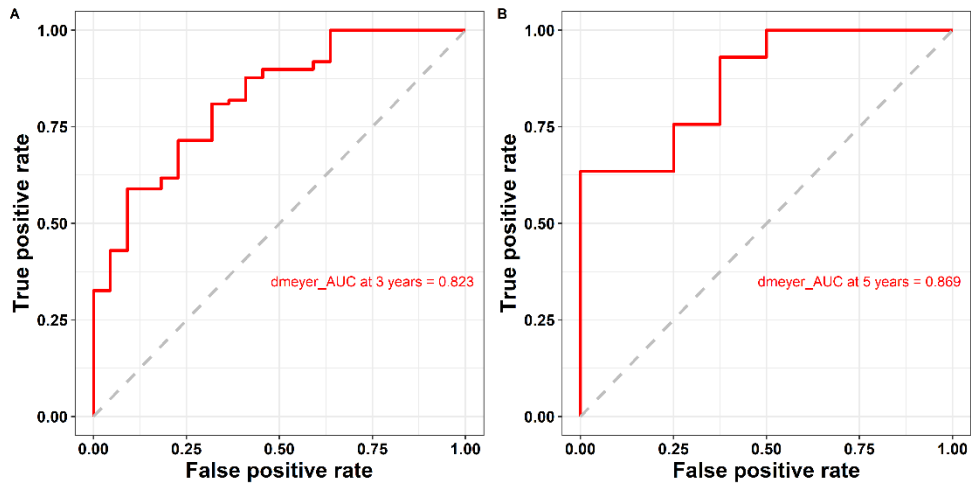

**Figure 12.** The performance of PAAD dataset on dmeyer basis function.

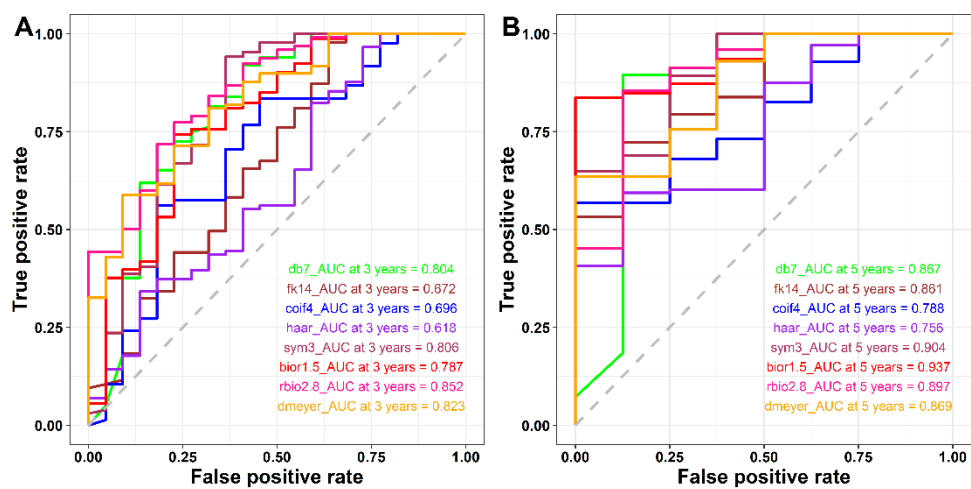

**Figure 13.** The performance of PAAD dataset on all basis functions (Take the smoothness corresponding to the best result for each basis function).
