# Supplementary material for: A Wavelet‐Based Learning Model Enhances Molecular Prognosis in Pancreatic Adenocarcinoma
Source: Hindawi journal article supplement (doi:10.1155/2021/7865856), 2021-01-01
Supplement: f1 [file 7865856.f1.zip]

## Additional file 6

### 1. STAD data

**Table 1.** Statistics of gene expression profiling, DNA methylation and clinical cohort information of STAD under study.

| Item                           | Statistics |
|--------------------------------|------------|
| <b>#. STAD clinical cohort</b> |            |
| Tumor                          | 375        |
| Normal                         | 32         |
| <b>Survival status (tumor)</b> |            |
| Living                         | 204        |
| Deceased                       | 171        |
| <b>Race (tumor)</b>            |            |
| Asian                          | 74         |
| Black                          | 11         |
| White                          | 238        |
| Not reported                   | 52         |
| <b>Tumor stage</b>             |            |
| I                              | 53         |
| II                             | 111        |
| III                            | 150        |
| IV                             | 38         |
| Not reported                   | 23         |
| <b>Follow-up (months)</b>      | 0.03-125.8 |
| <b>Age (years)</b>             |            |
| Range                          | 35-90      |
| Median                         | 63         |
| <b>Gender (tumor)</b>          |            |
| Male                           | 241        |
| Female                         | 134        |
| <b>#. (Epi) genomic data</b>   |            |
| mRNA profiling (DEGs)          | 16486      |
| DNA methylation (DMPs)         | 6197       |

## 2. The results of our proposed methods

**Table 1.** The detailed analysis results of STAD dataset about comparisons on the adopted wavelet-based, SWT-CNN methods and classic LASSO methods with diverse predictors

|               | Wavelet function | AUC at 3 years | AUC at 5 years | gene number |
|---------------|------------------|----------------|----------------|-------------|
| <b>db</b>     | db2              | 0.726          | 0.725          | 8           |
|               | db3              | 0.719          | 0.684          | 7           |
|               | db4              | 0.712          | 0.691          | 5           |
|               | db5              | 0.697          | 0.720          | 7           |
|               | db6              | 0.732          | 0.717          | 7           |
|               | db7              | 0.670          | 0.645          | 4           |
|               | db8              | 0.697          | 0.720          | 7           |
| <b>bior</b>   | bior1.1          | 0.656          | 0.655          | 7           |
|               | bior1.3          | 0.725          | 0.718          | 6           |
|               | bior1.5          | 0.710          | 0.706          | 6           |
|               | bior2.2          | 0.725          | 0.718          | 6           |
|               | bior2.4          | 0.707          | 0.690          | 6           |
|               | bior2.6          | 0.700          | 0.719          | 7           |
|               | bior2.8          | 0.725          | 0.718          | 6           |
|               | bior3.1          | 0.698          | 0.714          | 5           |
|               | bior3.3          | 0.701          | 0.697          | 5           |
|               | bior3.5          | 0.701          | 0.697          | 5           |
|               | bior3.7          | 0.700          | 0.719          | 7           |
|               | bior3.9          | 0.714          | 0.682          | 7           |
|               | bior4.4          | 0.710          | 0.706          | 6           |
|               | bior5.5          | 0.725          | 0.718          | 6           |
|               | bior6.8          | 0.710          | 0.706          | 6           |
| <b>sym</b>    | sym2             | 0.726          | 0.725          | 8           |
|               | sym3             | 0.719          | 0.684          | 7           |
|               | sym4             | 0.726          | 0.729          | 5           |
|               | sym5             | 0.701          | 0.780          | 7           |
|               | sym6             | 0.709          | 0.705          | 5           |
|               | sym7             | 0.756          | 0.730          | 12          |
|               | sym8             | 0.716          | 0.718          | 8           |
| <b>coif</b>   | coif2            | 0.709          | 0.705          | 5           |
|               | coif3            | 0.709          | 0.705          | 5           |
|               | coif4            | 0.712          | 0.691          | 5           |
|               | coif5            | 0.712          | 0.691          | 5           |
| <b>haar</b>   |                  | 0.692          | 0.681          | 9           |
| <b>dmeyer</b> |                  | 0.710          | 0.706          | 6           |
|               | rbio1.1          | 0.672          | 0.771          | 5           |
|               | rbio1.3          | 0.685          | 0.666          | 6           |

|                |         |       |       |    |
|----------------|---------|-------|-------|----|
| <b>rbio</b>    | rbio1.5 | 0.670 | 0.623 | 7  |
|                | rbio2.2 | 0.673 | 0.695 | 8  |
|                | rbio2.4 | 0.670 | 0.623 | 7  |
|                | rbio2.6 | 0.688 | 0.636 | 5  |
|                | rbio2.8 | 0.708 | 0.648 | 8  |
|                | rbio3.1 | 0.656 | 0.655 | 6  |
|                | rbio3.3 | 0.656 | 0.655 | 6  |
|                | rbio3.5 | 0.673 | 0.695 | 8  |
|                | rbio3.7 | 0.655 | 0.623 | 4  |
|                | rbio3.9 | 0.673 | 0.695 | 8  |
|                | rbio4.4 | 0.710 | 0.706 | 6  |
|                | rbio5.5 | 0.700 | 0.719 | 7  |
|                | rbio6.8 | 0.710 | 0.706 | 6  |
| <b>fk</b>      | fk4     | 0.709 | 0.703 | 6  |
|                | fk6     | 0.712 | 0.691 | 5  |
|                | fk8     | 0.716 | 0.718 | 8  |
|                | fk14    | 0.715 | 0.705 | 7  |
|                | fk18    | 0.697 | 0.720 | 7  |
|                | fk22    | 0.714 | 0.693 | 11 |
| <b>SWT-CNN</b> |         | 0.673 | 0.742 | 7  |
| <b>LASSO</b>   |         | 0.682 | 0.709 | 14 |

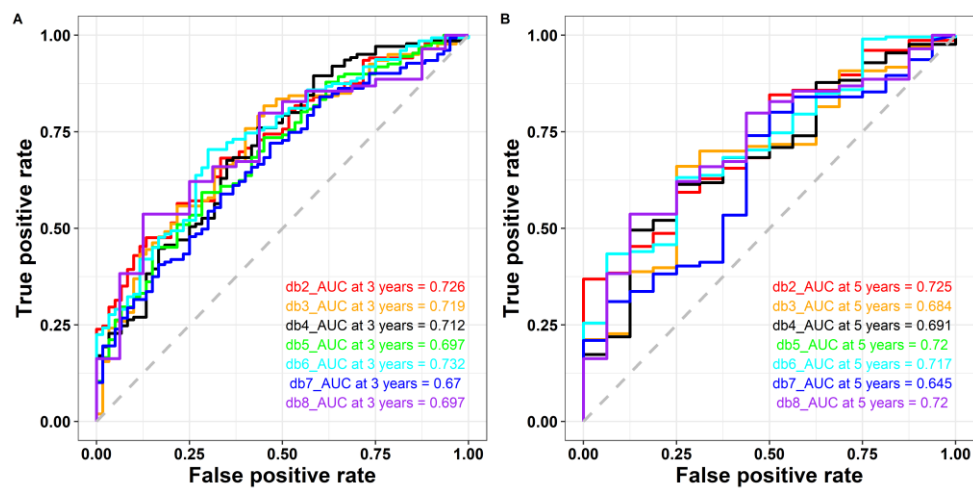

**Figure 1.** The performance of STAD dataset on db basis function.

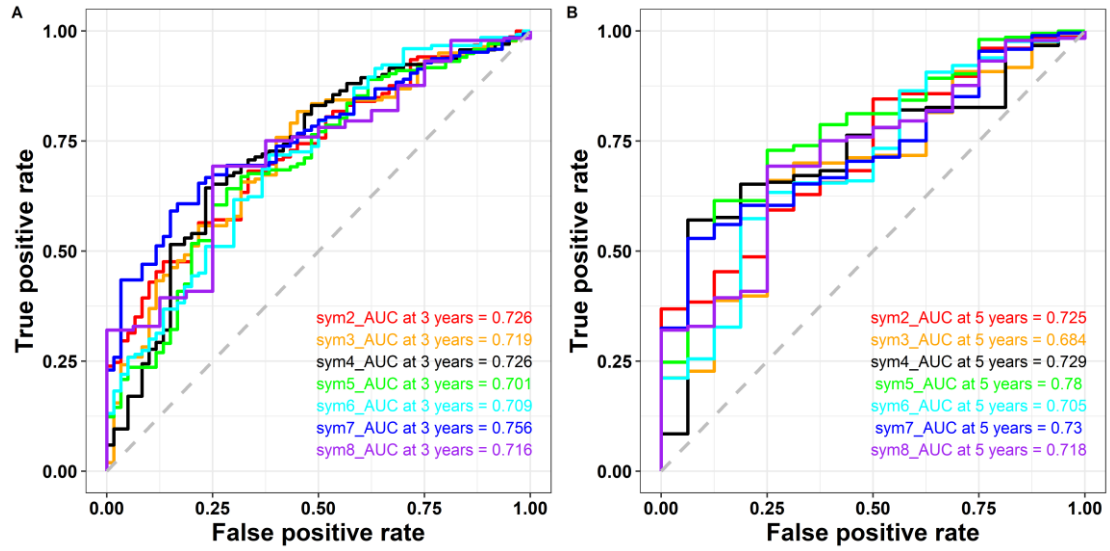

**Figure 2.** The performance of STAD dataset sym basis function.

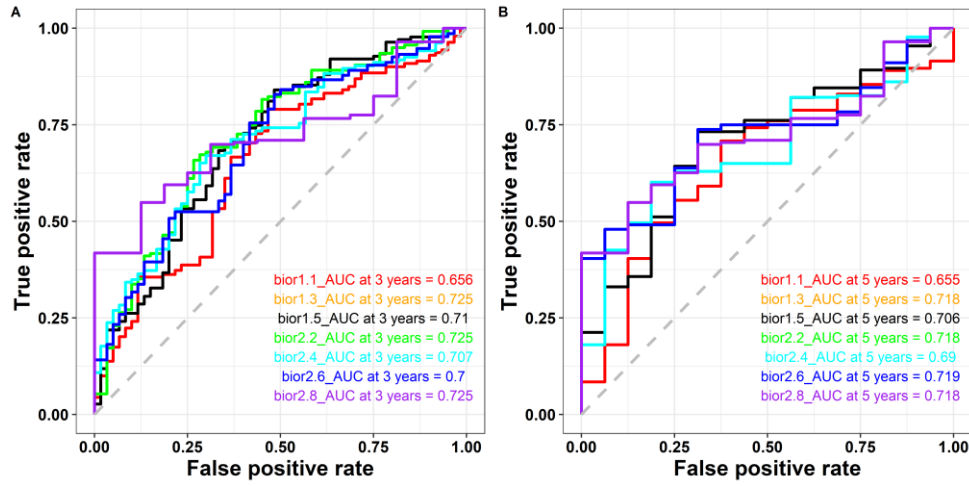

**Figure 3.** The performance of STAD dataset on bior basis function (bior1.1~bior2.8).

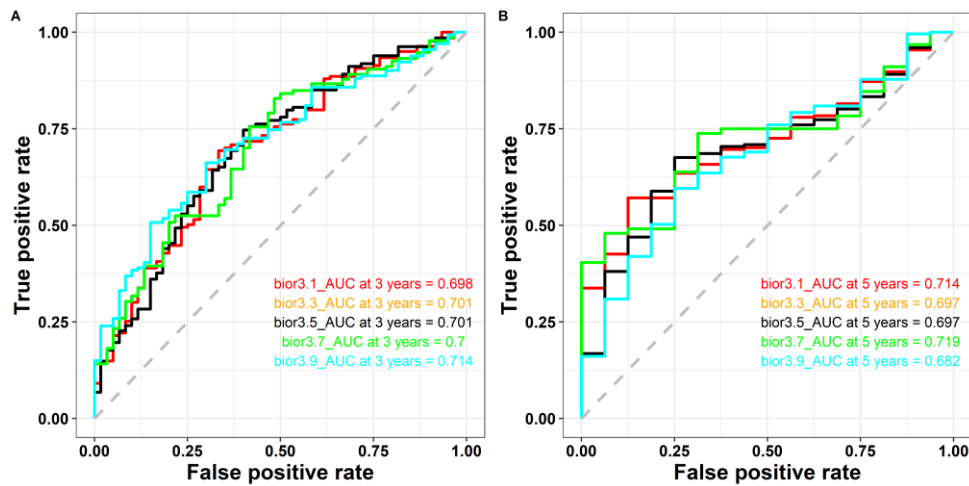

**Figure 4.** The performance of STAD dataset on bior basis function (bior3.1~bior3.9).

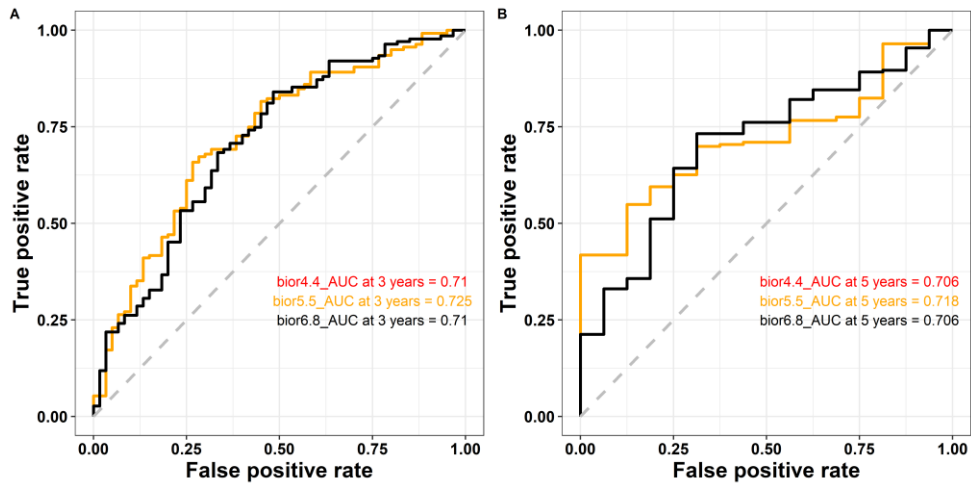

**Figure 5.** The performance of STAD dataset on bior basis function (bior4.4~bior6.8).

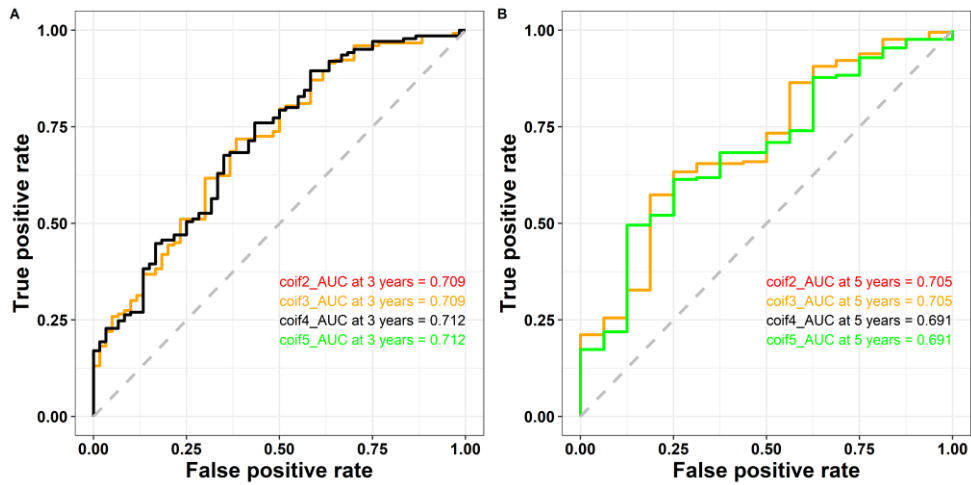

**Figure 6.** The performance of STAD dataset on coif basis function.

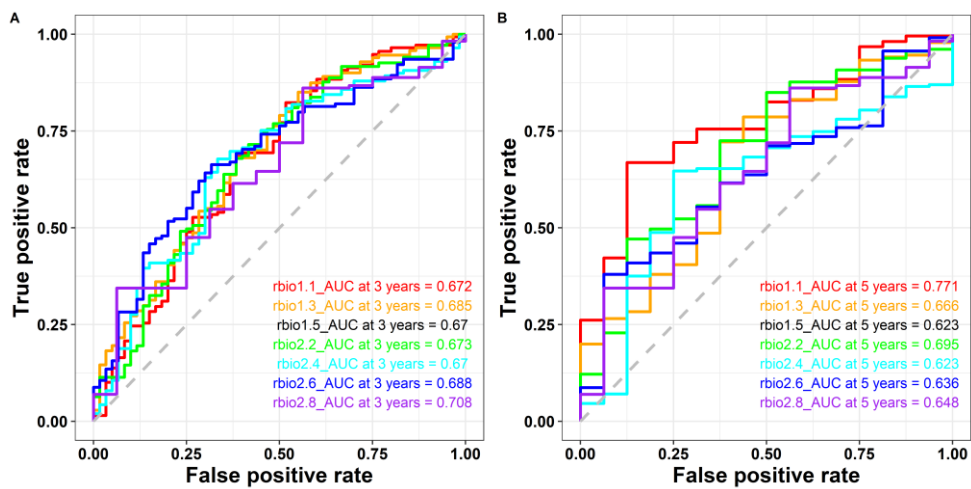

**Figure 7.** The performance of STAD dataset on rbio basis function (rbio1.1~rbio2.8).

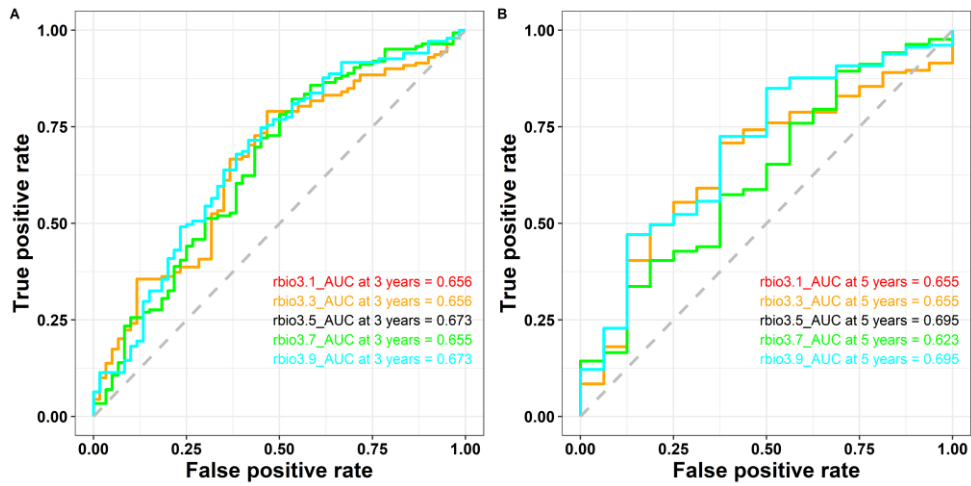

**Figure 8.** The performance of STAD dataset on rbio basis function (rbio3.1~rbio3.9).

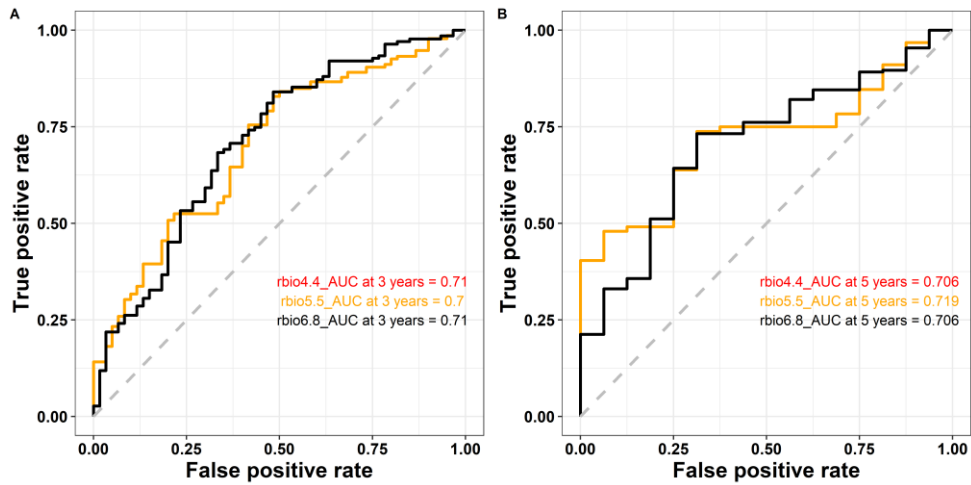

**Figure 9.** The performance of STAD dataset on rbio basis function (rbio4.4~rbio6.8).

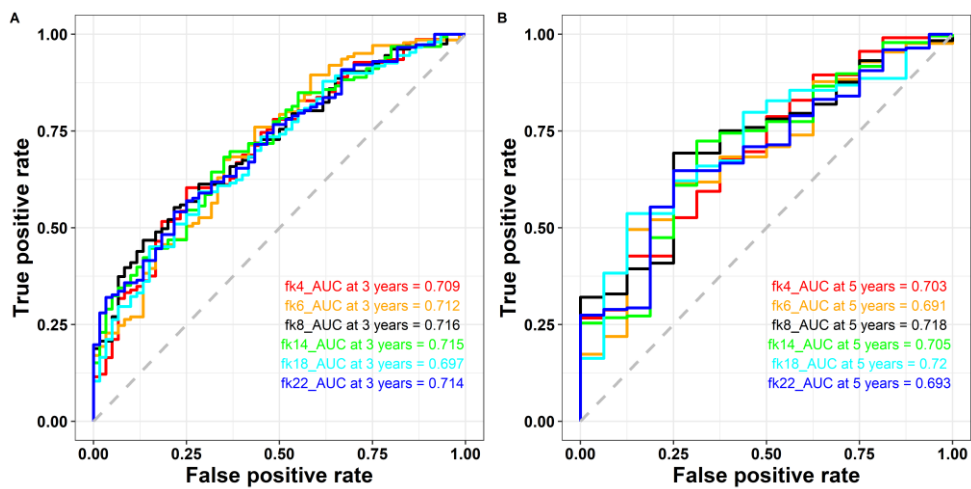

**Figure 10.** The performance of STAD dataset on fk basis function.

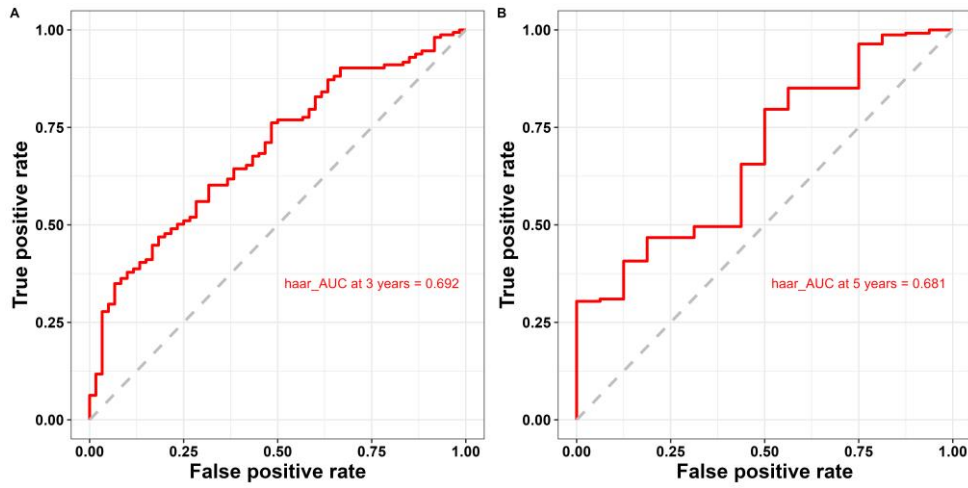

**Figure 11.** The performance of STAD dataset on haar basis function.

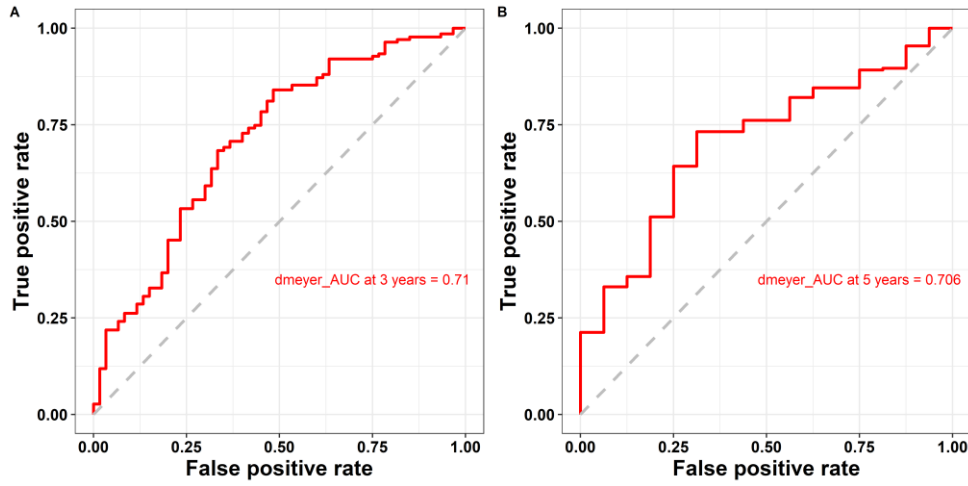

**Figure 12.** The performance of STAD dataset on dmeyer basis function.

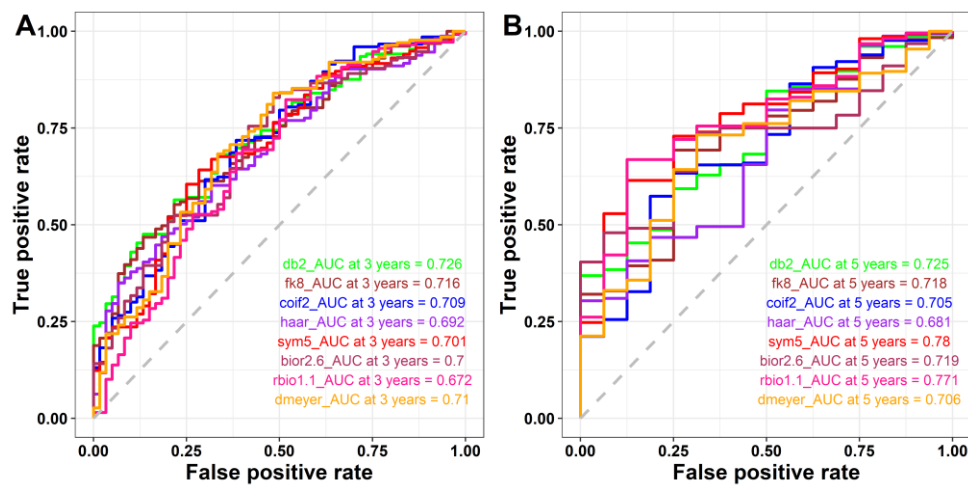

**Figure 13.** The performance of STAD dataset on all basis functions (Take the smoothness corresponding to the best result for each basis function).

### 3. Comparison of the three methods

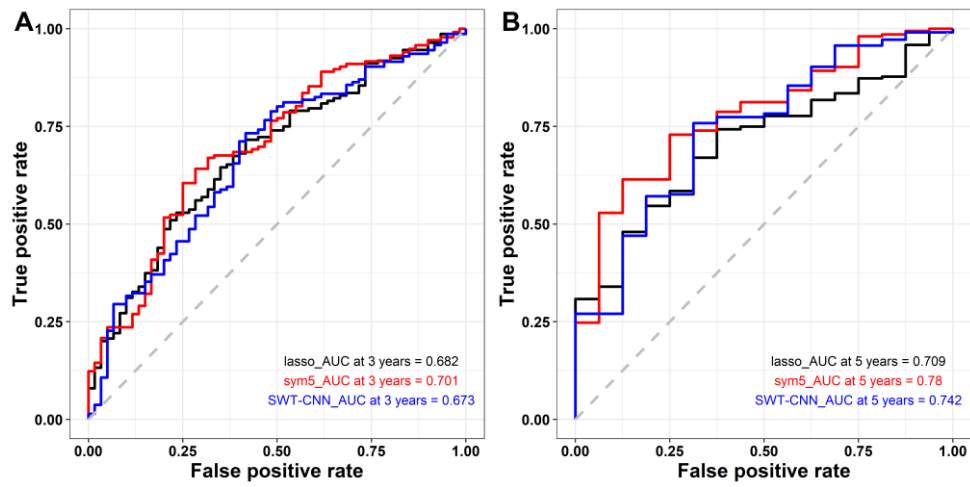

**Figure 16.** Comparison of the three methods on the STAD dataset. (A) AUC at 3 years: sym5\_AUC at 3 years = 0.701, lasso\_AUC at 3 years = 0.682, SWT-CNN at 3 years = 0.673; (B) AUC at 5 years: sym5\_AUC at 5 years = 0.780, lasso\_AUC at 5 years = 0.709, SWT-CNN at 5 years = 0.742.
