# Supplementary material for: A Wavelet-Based Learning Model Enhances Molecular Prognosis in Pancreatic Adenocarcinoma
Source: Biomed Res Int. 2021 Oct 16;2021:7865856. doi: 10.1155/2021/7865856 (PMC8541860; doi:10.1155/2021/7865856)
Supplement: Supplementary Materials — Additional file 1: the performance comparison of the proposed method. Additional file 2: the detailed results of KEGG pathway analyses. Additional file 3: the detailed results of GO analysis on the BP term. Additional file 4: the detailed results of GO analysis on the CC term. Additional file 5: the detailed results of GO analysis on the MF term. Additional file 6: the validation of the proposed method on the STAD dataset. [file 7865856.f1.zip]

Archive with 6 entries (6 files):
- Additional file 1 (2).pdf
- Additional file 2.txt
- Additional file 3.txt
- Additional file 4.txt
- Additional file 5.txt
- Additional file 6 (1).pdf
