# Supplementary material for: A Wavelet-Based Learning Model Enhances Molecular Prognosis in Pancreatic Adenocarcinoma
Source: Biomed Res Int. 2021 Oct 16;2021:7865856. doi: 10.1155/2021/7865856 (PMC8541860; doi:10.1155/2021/7865856)
Supplement: Supplementary Materials — Additional file 1: the performance comparison of the proposed method. Additional file 2: the detailed results of KEGG pathway analyses. Additional file 3: the detailed results of GO analysis on the BP term. Additional file 4: the detailed results of GO analysis on the CC term. Additional file 5: the detailed results of GO analysis on the MF term. Additional file 6: the validation of the proposed method on the STAD dataset. [file 7865856.f1.zip › Additional file 2.txt]

ID	Description	GeneRatio	pvalue	p.adjust	qvalue	geneID	Count	group
hsa04020	Calcium signaling pathway	102/737	2.27E-17	7.41E-15	5.15E-15	952/8913/6915/4843/2324/5733/2263/2255/27006/815/2249/2260/7419/2778/4842/3710/8911/4923/2254/2321/2906/4233/2253/5023/57620/2246/3274/5136/6869/6543/148/5533/5737/3709/5582/3791/196883/4803/5156/1910/3706/5330/109/3973/51196/2250/1950/4916/2774/773/56034/1956/774/3363/5331/7424/775/2911/5578/5137/114/2776/3362/2905/115/219931/9965/4486/3360/107/5979/552/5579/6786/2668/2915/5724/1816/6870/163688/…	102	1
hsa04015	Rap1 signaling pathway	88/737	1.07E-14	1.75E-12	1.21E-12	3683/5606/2324/9564/2263/2255/27006/2249/2260/2775/2778/285/1943/51378/2254/2321/5595/5296/4233/2889/2253/2246/2771/1268/64411/5582/5605/3791/9732/196883/10451/4803/5156/9771/5879/5330/109/51196/2250/1950/3480/1969/56034/1956/1813/5331/3688/7424/9223/284/5578/114/2776/7074/3689/7410/115/9965/107/5579/10636/163688/3684/5293/111/3265/2902/1436/1946/57121/2248/9863/345456/6714/26037/6494/3690/83593/…	88	1
hsa04010	MAPK signaling pathway	102/737	9.50E-11	1.03E-08	7.20E-09	8913/9254/5606/2324/5923/2263/7132/2255/27006/9448/6196/2249/2260/8569/2122/51701/8550/285/1943/8911/51378/2254/2321/5595/6788/59284/4233/2253/84867/80824/5924/2246/3552/1843/5533/9479/2322/3553/5582/5605/7186/3791/59285/4772/4803/5156/51347/5879/2250/1950/23162/3480/773/59283/1969/9064/5778/56034/5921/2768/1956/774/5058/7424/93589/775/5801/284/5578/55799/9965/783/5579/2353/3265/627/2885/1436/194…	102	1
hsa04080	Pancreatic cancer	110/737	2.31E-09	1.68E-07	1.17E-07	5337/5595/5296/1026/5879/1950/1956/3716/4088/5293/2862/2906/7434/1395/5023/2557/4988/2916/3274/5443/6869/4985/3953/1268/2834/2891/148/2693/5737/4852/10888/2914/57152/5697/6754/2922/4544/4829/1910/3062/3973/116/113091/5746/2559/2561/2741/1392/3363/1813/84539/2893/2911/6750/3362/2905/7349/2899/4886/4889/3360/2898/552/2562/2587/5729/2915/5724/1816/6870/147/7200/719/146/339403/3952/2902/3350/6752/113…	110	1
hsa04014	Ras signaling pathway	82/737	2.57E-09	1.68E-07	1.17E-07	2324/5923/2263/11186/2255/27006/2249/9462/5337/2260/285/1943/51378/2254/2321/5595/5296/4233/2253/2549/8437/5924/2246/2322/5582/5605/3791/4803/5156/9771/5879/56924/51196/2250/1950/3480/8844/1969/27/56034/5921/1956/3363/5058/7424/284/5578/7074/2114/9965/5579/2786/163688/283455/5293/3265/2788/627/2902/2885/1436/1946/8398/4908/22821/2248/123745/5320/4763/4914/83593/2904/8399/64926/7535/1944/25780/279…	82	1
hsa04024	cAMP signaling pathway	77/737	1.04E-08	5.65E-07	3.93E-07	1387/5733/5141/815/5337/8310/2778/6548/610/4792/5595/268/2906/5296/5143/7434/1395/2737/10846/5144/2771/5443/2891/64411/2693/4852/6662/5605/482/196883/4772/10451/5879/109/3973/51196/116/55811/1261/1392/5058/1813/775/2893/114/7074/6750/90993/3362/7410/2905/115/476/4886/3360/107/1816/163688/2353/5293/5139/111/627/2902/3350/6752/1129/5142/5727/6262/116443/2550/2904/480/6751/481/3352	77	1
hsa04512	ECM-receptor interaction	40/737	1.36E-08	6.36E-07	4.42E-07	960/10319/3909/8516/3912/3655/1299/284217/1311/1277/7450/1297/3910/7060/3676/6382/7143/3691/1284/22801/80144/1280/3695/1292/3680/3688/158326/7148/255743/9899/7058/1282/375790/3914/2812/3690/3675/3696/948/131873	40	1
hsa04151	PI3K-Akt signaling pathway	110/737	2.36E-08	9.65E-07	6.71E-07	2324/10319/3909/2263/2255/27006/5522/2249/2260/8516/5527/3320/23239/3912/3655/285/1299/1943/51378/284217/2254/2321/5595/7249/5296/1311/4233/2253/1277/7450/1297/896/3910/7060/2246/3676/7143/6446/894/2322/1026/5605/3791/2056/3691/4803/5156/1284/5879/5519/22801/2250/1950/1280/3695/3480/23533/57521/1292/1969/3680/56034/9180/1956/3688/7424/9223/284/5578/5521/90993/9965/3716/2786/7148/3667/5293/596/326…	110	1
hsa04713	Circadian entrainment	42/737	3.41E-08	1.24E-06	8.62E-07	8913/815/2775/2778/4842/3710/8911/5595/2906/2771/2891/5582/196883/4544/5330/109/116/55811/5331/775/2977/2893/5578/114/2776/3763/2905/115/107/5579/2786/163688/2353/111/2788/2902/6261/8912/6262/6263/2904/2793	42	1
hsa04510	Focal adhesion	67/737	9.04E-07	1.89E-05	1.31E-05	2324/10319/9564/3909/5923/87/8516/5829/3912/3655/1299/284217/2321/5595/5296/1311/4233/2889/1277/7450/1297/896/3910/7060/3676/7143/894/5582/3791/3691/10451/5156/1284/5879/22801/56924/1950/1280/3695/3480/1292/3680/56034/1956/5058/3688/7424/5578/7791/7410/824/5579/7148/5293/596/3265/2885/7058/1282/29780/3914/6714/3690/3675/3696/64098/131873	67	1
hsa04360	Axon guidance	61/737	2.26E-06	4.11E-05	2.86E-05	2042/25791/815/2046/10512/5362/285220/1808/3983/1943/4773/5595/5296/4233/90249/2771/5361/2043/5533/1948/10154/5879/56924/1969/151449/9353/2044/5921/5058/3688/64221/5578/2047/137970/56896/22854/6259/84448/6469/6091/5293/3265/8633/56963/2242/6586/1946/10509/5727/6585/1630/10507/64218/2050/6714/659/91584/57715/1944/1942/2049	61	1
hsa04970	Salivary secretion	36/737	7.78E-06	0.000101757	7.08E-05	952/2778/4842/6548/3710/727897/148/3709/5582/482/196883/5330/109/5331/2977/5578/114/2776/3778/115/476/107/5579/163688/147/146/111/155/6263/1472/3783/480/481/362/820/1755	36	1
hsa04972	Pancreatic secretion	38/737	1.25E-05	0.000151935	0.000105643	952/3784/2778/6548/1357/3710/3709/5582/482/196883/5879/5330/109/1506/63036/5331/5578/114/2776/3778/115/219931/476/107/5579/1504/440387/1056/111/885/5320/6262/5408/5646/8399/480/481/1359	38	1
hsa04310	Wnt signaling pathway	47/737	0.002355218	0.011848558	0.008238495	51384/1387/7089/815/23291/51701/4773/343637/8312/6422/27121/1855/54894/11211/896/10297/7475/894/5533/5582/4772/5879/5330/7090/6423/340419/6934/5331/83439/5578/89780/27123/11197/1487/4041/166336/6259/64321/5579/4088/8313/284654/1501/81839/56998/8061/7477	47	1
hsa04350	TGF-beta signaling pathway	27/737	0.015110863	0.052566511	0.036550351	1387/4092/5595/268/652/91/5519/4091/151449/654/392255/5308/2200/26585/4088/3400/285704/7050/56963/6667/79875/57154/659/3397/269/7044/7124	27	1
hsa04520	Adherens junction	21/737	0.021674465	0.071591414	0.049778675	1387/1496/87/2260/51701/10580/5595/4233/6615/4008/5879/3480/5792/1956/6934/83439/4088/5797/10458/6714/7454	21	1
hsa00982	Drug metabolism - cytochrome P450	15/737	0.400119325	0.681453225	0.473825516	4257/2326/2950/218/1571/222/54578/1555/54575/119391/1577/1559/1576/54658/54576	15	1
hsa05212	Neuroactive ligand-receptor interaction	10/737	0.935137741	1	0.695316272	5337/5595/5296/1026/5879/1950/1956/3716/4088/5293	10	1
hsa04724	Glutamatergic synapse	46/737	1.04E-07	3.40E-06	2.37E-06	5337/2775/2778/57084/3710/5595/9455/57030/2906/2916/2771/2891/5533/3709/2914/5582/196883/5330/109/773/5331/775/2893/2911/5578/114/2776/2905/50944/115/22941/2899/2898/107/5579/2786/2915/111/2788/2902/123745/2917/116443/2904/2793/255189	46	1
hsa04928	Parathyroid hormone synthesis, secretion and action	43/737	2.26E-07	6.72E-06	4.68E-06	1591/5141/5337/9138/2260/2778/3710/5595/5143/2625/5144/2771/4209/3709/1026/860/9247/5582/196883/9365/5330/109/2768/1956/5331/5578/114/2776/4325/90993/115/4041/107/5579/2353/596/111/5142/6667/6256/142680/9935/632	43	1
hsa05032	Morphine addiction	38/737	4.74E-07	1.29E-05	8.98E-06	5141/2775/2778/140679/5143/2557/4988/10846/8622/5144/2771/5136/5582/196883/109/773/2559/2561/774/5578/5137/114/3763/115/107/2562/5579/2786/5139/111/2788/2567/5142/2558/2869/2550/50940/2793	38	1
hsa04725	Cholinergic synapse	44/737	6.47E-07	1.63E-05	1.13E-05	3784/1103/815/1136/2775/3710/1137/5595/5296/2771/60482/9132/3709/5582/196883/5330/109/23533/773/774/5331/775/5578/114/2776/3763/90993/115/107/5579/2786/2353/5293/596/111/3265/2788/1132/1129/3786/3768/56479/6572/2793	44	1
hsa05414	Dilated cardiomyopathy	39/737	7.86E-07	1.83E-05	1.28E-05	9254/8516/2778/3655/284217/59284/3676/6543/7139/196883/59285/3691/4607/22801/109/3695/59283/7170/3680/3688/93589/775/114/55799/70/115/107/783/7171/111/1674/6546/4624/6262/3690/3675/10368/3696/7124	39	1
hsa04971	Gastric acid secretion	33/737	9.24E-07	1.89E-05	1.31E-05	3784/815/3776/2778/6548/3710/54207/495/3274/2771/3709/5582/482/196883/5330/109/5331/3758/5578/114/2776/6750/115/476/107/5579/163688/111/389015/6752/496/480/481	33	1
hsa04950	Maturity onset diabetes of the young	16/737	2.22E-06	4.11E-05	2.86E-05	5080/3172/2645/2494/50674/4821/4760/4825/3175/168620/389692/3170/6927/3651/3174/3171	16	1
hsa04810	Regulation of actin cytoskeleton	70/737	2.43E-06	4.17E-05	2.90E-05	3683/9564/26999/2263/2255/27006/87/2249/9138/2260/8516/3682/5829/6548/3655/8874/2254/5595/79784/5296/2253/2246/10096/3676/10297/5605/10095/3691/4629/10451/5156/50649/5879/22801/56924/2250/1950/3695/3680/56034/10788/2768/1956/5058/3688/7074/3689/7410/9965/3684/5293/4342/3265/10458/1132/1129/221178/57121/2248/345456/6714/3690/23191/3675/85477/3696/3071/3687/3681/128239	70	1
hsa04514	Cell adhesion molecules	52/737	3.31E-06	5.42E-05	3.77E-05	3683/1272/9369/51208/8516/4897/3655/8174/9379/6404/3676/6382/965/79679/9071/3695/5792/3680/4684/3688/925/4685/58494/9073/50848/23562/3689/22854/7412/57863/23114/149461/6383/3684/1000/5797/947/26047/1002/9378/23705/7122/5133/3106/933/5788/4099/3696/10666/1366/1364/6693	52	1
hsa04730	Long-term depression	27/737	3.92E-06	6.11E-05	4.25E-05	2775/2778/4842/3710/5595/2771/2891/3709/5582/5605/5519/5330/3480/773/2768/1392/5331/2977/2911/5578/2776/5579/3265/123745/6261/4067/255189	27	1
hsa05412	Arrhythmogenic right ventricular cardiomyopathy	32/737	4.26E-06	6.34E-05	4.41E-05	9254/5318/1496/88/8516/3655/284217/59284/3676/6543/59285/3691/22801/3695/59283/3680/6934/3688/93589/775/83439/55799/783/1000/1674/6546/6262/89/3690/3675/10368/3696	32	1
hsa04974	Protein digestion and absorption	39/737	6.16E-06	8.76E-05	6.09E-05	11136/91522/3784/1301/6550/50509/1357/1299/1277/1297/6543/482/1289/1284/1280/1506/1292/63036/476/1504/440387/255631/340024/80781/6546/1282/7373/84570/1302/1306/5646/1308/3783/59272/480/481/1359/131873/5222	39	1
hsa04662	B cell receptor signaling pathway	33/737	6.98E-06	9.51E-05	6.61E-05	4792/4773/5595/5296/5533/5605/4772/10451/5879/7410/5579/2353/5293/3265/2885/8519/84433/4067/695/933/2213/10859/11024/10990/10288/971/25780/118788/11006/11025/102725035/23547/11027	33	1
hsa04921	Oxytocin signaling pathway	52/737	9.85E-06	0.000123831	8.61E-05	952/9254/815/2775/2778/3710/4773/5595/59284/51422/10645/2771/5533/3709/1026/5582/5605/196883/59285/4772/5330/109/23533/59283/1956/5331/93589/775/2977/5578/114/2776/55799/3763/115/107/783/5579/163688/2353/111/3265/57118/3768/123745/6261/6714/6262/6263/10368/5743/255189	52	1
hsa04727	GABAergic synapse	34/737	1.92E-05	0.000224443	0.000156059	6540/2775/140679/2557/6539/2771/57468/5582/2571/196883/6538/2572/109/773/2559/2561/774/775/5578/114/6529/3763/115/107/2562/5579/2786/111/2788/2567/2558/6714/2550/2793	34	1
hsa04911	Insulin secretion	33/737	2.28E-05	0.000257148	0.000178799	815/2778/3710/2645/6513/5582/482/196883/54795/6616/5330/109/116/5331/775/5578/114/2776/3778/90993/115/476/107/5579/111/9699/885/6262/3783/6804/480/3651/481	33	1
hsa04927	Cortisol synthesis and secretion	27/737	2.39E-05	0.000260896	0.000181405	8913/3776/2778/3710/8911/8622/5443/3709/196883/3949/2516/5330/109/6770/5331/775/114/2776/90993/115/107/3777/111/3739/6667/5087/8912	27	1
hsa05410	Hypertrophic cardiomyopathy	34/737	2.53E-05	0.000266898	0.000185578	9254/8516/3655/284217/59284/51422/3676/6543/7139/59285/3691/4607/22801/3695/59283/7170/3680/3688/93589/775/55799/70/1636/783/7171/1674/6546/4624/6262/3690/3675/10368/3696/7124	34	1
hsa04380	Osteoclast differentiation	44/737	2.85E-05	0.000290822	0.000202213	7132/4792/4773/5595/5296/3552/2274/5533/3553/2354/7186/4772/5879/8792/8878/3716/2353/5293/2885/1436/9021/4286/3690/695/3937/6688/2213/4689/10859/11024/10990/4688/10288/653361/2215/8061/11006/2214/11025/102725035/7124/23547/11027/3455	44	1
hsa04540	Gap junction	33/737	3.95E-05	0.000391084	0.000271927	2778/3710/5595/2771/3709/5582/5605/196883/5156/5330/109/1950/56034/1956/1813/5331/2977/2911/5578/114/2776/57369/115/107/5579/2915/111/3265/2885/203068/6714/10382/79861	33	1
hsa05033	Nicotine addiction	19/737	4.21E-05	0.000405157	0.000281712	57084/1137/140679/57030/2906/2557/2891/773/2559/2561/774/2893/2905/2562/2902/2567/2558/116443/2904	19	1
hsa04261	Adrenergic signaling in cardiomyocytes	49/737	4.71E-05	0.000440512	0.000306295	9254/3784/815/5522/5527/2778/6548/5595/59284/2771/6543/7139/148/482/196883/59285/5519/5330/109/23533/59283/7170/5331/93589/775/5578/114/2776/5521/55799/90993/70/115/476/107/783/7171/163688/147/596/146/111/3753/6546/4624/6262/10368/480/481	49	1
hsa04915	Estrogen signaling pathway	45/737	9.94E-05	0.000903131	0.000627961	3320/5241/8648/4313/2775/2778/2099/3710/4318/5595/5296/4988/2771/5443/3709/5605/196883/5330/109/1956/5331/2911/114/2776/3763/90993/115/107/163688/2353/5293/596/111/3265/2885/6667/390792/6714/3305/2550/3875/7031/3880/3866/3860	45	1
hsa04062	Chemokine signaling pathway	58/737	0.000122305	0.001080907	0.000751573	2268/10344/9564/5829/4792/3055/5595/5296/1235/131890/2771/1236/196883/10451/1794/5879/5330/109/23533/5058/5331/9844/114/2776/7074/7410/643/115/3577/107/5579/2786/5293/111/3265/2788/2885/6714/2869/4067/7454/6347/5197/729230/6372/653361/1234/1230/2793/1524/10663/6351/6359/9560/388372/6349/414062/6358	58	1
hsa04720	Long-term potentiation	26/737	0.000132562	0.001140729	0.000793168	1387/815/6196/3710/5595/2906/2891/5533/3709/5582/5605/5330/5331/775/2911/5578/114/2776/2905/107/5579/2915/163688/3265/2902/2904	26	1
hsa05144	Malaria	21/737	0.000156967	0.00131611	0.000915113	3683/1311/4233/7060/6382/4035/3553/2995/3606/3689/7412/6383/7058/1379/6347/3820/948/3040/1378/3039/7124	21	1
hsa04918	Thyroid hormone synthesis	28/737	0.000162796	0.001330861	0.000925369	389434/2778/5172/3710/2936/3709/7849/5582/482/196883/5330/109/405753/50506/5331/5578/114/2776/90993/115/476/107/5579/111/7173/480/481/2877	28	1
hsa04960	Aldosterone-regulated sodium reabsorption	17/737	0.000177967	0.001419395	0.000986928	9351/5595/5296/6337/6446/5582/482/53828/3758/5578/476/5579/3667/5293/2810/480/481	17	1
hsa04670	Leukocyte transendothelial migration	38/737	0.000203357	0.001583279	0.001100879	3683/9564/1496/51208/87/4313/5829/4318/5296/2771/3676/5582/10451/9071/5879/3688/7070/5578/58494/9073/50848/23562/3689/7410/7412/149461/5579/3684/5293/7122/6494/83593/4689/4688/653361/1536/1366/1364	38	1
hsa05163	Human cytomegalovirus infection	65/737	0.00020853	0.001585799	0.001102632	5733/9564/841/7132/9138/7188/2775/2778/5829/3710/4792/4773/5595/7249/5296/2771/5533/3709/1026/3553/5582/5605/7186/196883/4772/5156/5879/5330/109/2768/1956/5331/5578/114/2776/90993/115/3716/107/5579/2786/6890/163688/5293/111/3265/2788/2885/6667/1978/6714/3106/3690/5743/6347/3587/1234/1230/2793/7124/6351/9560/388372/6349/414062	65	1
hsa05202	Transcriptional misregulation in cancer	57/737	0.000232241	0.001725974	0.001200098	51384/8938/5081/5218/6929/3205/862/4318/2321/4233/3195/7704/7850/894/2322/1031/1026/860/7849/64919/8900/5077/2120/3695/3480/3486/8091/2308/2313/2078/85414/861/3248/30012/79058/3684/9915/4299/1436/7113/7490/6667/5087/6256/4286/5079/1991/4914/3206/3207/6688/1053/51804/4314/171558/2118/8357	57	1
hsa04934	Cushing syndrome	48/737	0.000241257	0.001753132	0.001218981	51384/8913/815/3776/2778/3710/8911/5595/8312/1395/1855/11211/8622/2771/5443/10297/7475/1031/3709/1026/5605/196883/3949/2516/5330/109/1956/6770/1392/6934/5331/775/83439/89780/114/2776/90993/115/107/8313/3777/111/3739/6667/5087/8912/50940/7477	48	1
hsa04726	Serotonergic synapse	38/737	0.000248827	0.001768835	0.0012299	240/2775/2778/5742/3710/5595/1562/2771/1843/3709/5582/1644/5330/773/2561/774/3363/5331/775/5578/2776/3763/3362/3360/6571/2562/5579/2786/111/3265/2788/3350/123745/5743/1559/2793/255189/3352	38	1
hsa05165	Human papillomavirus infection	89/737	0.000259455	0.001805141	0.001255144	51384/1387/10319/3909/841/7132/5522/8516/5527/2778/5829/3912/3655/1299/284217/5595/8312/7249/5296/1311/3955/1855/1277/10312/7450/11211/1297/896/3910/7060/3676/10297/7475/7143/894/11317/1026/5605/23352/7187/3996/3691/8900/1284/5519/22801/1950/1280/3695/1292/3680/1956/4851/6934/3688/1740/2308/9223/83439/89780/5521/90993/3716/26508/7015/7148/8313/5293/390992/3265/2885/387332/84441/7058/1282/1978/555…	89	1
hsa04930	Type II diabetes mellitus	19/737	0.000413484	0.002816862	0.00195861	8913/5595/5296/2645/8835/773/774/775/80201/3099/3667/5581/5293/389692/9021/777/3651/3101/7124	19	1
hsa04925	Aldosterone synthesis and secretion	33/737	0.000422922	0.00282236	0.001962433	8913/815/2778/3710/8911/5443/3709/5582/482/196883/3949/5330/109/6770/5331/775/5578/114/2776/90993/115/476/107/5579/51305/163688/5581/3777/111/57118/8912/480/481	33	1
hsa05230	Central carbon metabolism in cancer	25/737	0.000775672	0.004974066	0.003458549	2263/5214/51548/2260/5595/8140/5296/4233/2645/3945/6513/2322/5605/5156/4916/9123/1956/80201/3099/5979/5293/3265/3418/4914/3101	25	1
hsa04916	Melanogenesis	33/737	0.000775772	0.004974066	0.003458549	51384/1387/815/2775/2778/5595/1855/11211/2771/5443/7475/5582/5605/196883/1910/5330/109/6934/5331/83439/5578/89780/114/2776/90993/115/107/5579/163688/111/3265/4286/7477	33	1
hsa05205	Proteoglycans in cancer	58/737	0.000794943	0.004998968	0.003475864	51384/960/286/2817/815/9138/2260/4313/5829/6548/2099/3710/4318/5595/5296/4233/1277/2549/11211/7475/6382/7291/3709/1026/5582/5605/3791/3236/10451/5879/51196/3480/287/1956/5058/3688/288/5578/89780/7074/7410/6469/5579/6383/3316/5293/60495/3265/2885/5727/6714/406903/3690/2065/3549/3059/7477/7124	58	1
hsa04750	Inflammatory mediator regulation of TRP channels	32/737	0.00093673	0.005779448	0.004018544	5606/815/2778/3710/8989/5296/3709/3553/5582/196883/4803/5330/109/5331/5578/114/2776/115/107/5579/163688/5581/5293/111/8398/123745/3556/3269/6714/4914/2150/255189	32	1
hsa04550	Signaling pathways regulating pluripotency of stem cells	43/737	0.000979161	0.005929361	0.004122781	51384/5080/3670/2263/6929/2260/64211/5595/8312/5296/1749/3198/1855/11211/9421/10297/7475/3211/652/5605/3231/6926/91/6498/3480/463/89780/3716/4088/8313/3175/5293/3400/3265/2885/4762/10336/659/5013/3397/3976/7044/7477	43	1
hsa04935	Growth hormone synthesis, secretion and action	37/737	0.001099288	0.006535768	0.004544426	1387/5606/9564/2778/3710/5595/5296/2771/8835/2693/3709/5582/5605/196883/5330/109/55811/3486/5331/775/5578/114/2776/6750/90993/115/107/5579/3667/2353/5293/111/3265/2885/6752/9021/6751	37	1
hsa04929	GnRH secretion	23/737	0.00112569	0.006573223	0.004570469	8913/3710/610/8911/5595/5296/3709/5582/5605/5330/5331/775/5578/2776/3763/348980/5579/5293/3265/8912/2550/3783/3814	23	1
hsa04611	Platelet activation	38/737	0.001280591	0.007346546	0.005108173	6915/9138/2778/5742/3710/5595/5296/5023/1277/7450/2771/3709/196883/5330/109/23533/83706/5331/3688/2977/114/2776/115/107/6786/5293/111/123745/6714/2812/4067/3690/695/3937/54518/255189/64805/10125	38	1
hsa05031	Amphetamine addiction	24/737	0.001496536	0.008437369	0.00586664	815/2778/2906/2891/5533/2354/5582/1644/6531/775/2893/5578/90993/2905/6571/5579/163688/2353/111/2902/23237/116443/2904/6804	24	1
hsa04666	Fc gamma R-mediated phagocytosis	31/737	0.001654356	0.009169057	0.006375394	5337/273/55616/3055/5595/5296/10096/5582/10095/10451/5879/4651/5058/8853/5578/7410/5579/5581/5293/65108/8398/123745/4067/85477/7454/2213/5788/653361/2215/255189/2214	31	1
hsa05224	Breast cancer	43/737	0.001791973	0.009766252	0.006790634	51384/2324/2255/27006/2249/2260/5241/8648/10683/2099/2254/5595/8312/5296/1855/2253/11211/2246/10297/7475/1026/5605/2250/1950/3480/1956/4851/6934/83439/89780/4041/9965/26508/8313/2353/5293/3265/2885/6667/2248/28514/4855/7477	43	1
hsa05207	Chemical carcinogenesis - receptor activation	58/737	0.001902776	0.010149219	0.007056917	4257/2255/27006/6196/2249/1136/3320/5241/2778/10683/2099/1137/688/2254/5595/79852/5296/2253/896/2771/5582/5605/196883/109/1545/2250/1950/773/2052/1956/774/775/5578/114/90993/115/107/5579/54578/2353/5293/596/111/3265/2885/6256/2248/1978/155/6714/1555/28514/54575/119391/1576/253152/54658/54576	58	1
hsa04721	Synaptic vesicle cycle	26/737	0.001958554	0.010149219	0.007056917	6540/6857/22999/57084/112755/140679/6530/57030/8775/10312/6539/23025/6538/6616/773/6531/10814/774/6529/6571/9152/10815/161/6572/26052/6804	26	1
hsa05142	Chagas disease	32/737	0.0019687	0.010149219	0.007056917	8837/4843/841/7132/5522/2775/2778/4792/5595/5296/2771/3553/5519/5330/2774/5331/2776/5521/1636/107/2353/5293/10333/6347/714/917/713/712/916/7124/6349/414062	32	1
hsa05231	Choline metabolism in cancer	31/737	0.001986392	0.010149219	0.007056917	1608/5337/8527/5595/7249/5296/1119/60482/5582/5605/57153/5156/5879/1950/56034/6581/1956/5578/9162/5130/5579/2353/5293/3265/2885/6667/1978/123745/80736/7454/255189	31	1
hsa01521	EGFR tyrosine kinase inhibitor resistance	26/737	0.002399556	0.011888708	0.008266412	2263/5595/5296/4233/2549/5582/5605/3791/5156/1950/3480/56034/1956/5578/3084/9542/3716/5579/5293/596/3265/2885/1978/4763/6714/2065	26	1
hsa04270	Vascular smooth muscle contraction	39/737	0.002724148	0.013295467	0.009244554	9138/2778/3710/5595/79784/148/10268/3709/5582/5605/196883/4629/5330/109/2768/5331/775/2977/5578/114/2776/3778/115/4880/107/552/5579/94274/163688/147/5581/146/111/8398/123745/5320/8399/255189/136	39	1
hsa04926	Relaxin signaling pathway	38/737	0.00280938	0.013509814	0.009393593	4843/4313/2775/2778/4842/4792/4318/5595/5296/1277/2771/5605/196883/1284/1910/5330/109/1956/5331/7424/5578/114/90993/115/107/2786/2353/5293/339403/111/3265/2788/2885/51289/1282/6714/2793/4312	38	1
hsa04961	Endocrine and other factor-regulated calcium reabsorption	19/737	0.003048527	0.014447368	0.01004549	2778/2099/793/6543/5582/482/9365/5330/5331/5578/2776/115/476/5579/161/6546/26052/480/481	19	1
hsa04012	ErbB signaling pathway	27/737	0.003523731	0.016292174	0.011328214	815/5595/5296/2549/868/1026/5582/5605/56924/1950/27/1956/5058/5578/3084/9542/5579/5293/3265/2885/10718/1978/6714/2065/374/2069/685	27	1
hsa05140	Leishmaniasis	25/737	0.003537445	0.016292174	0.011328214	4843/4792/1917/5595/3552/3676/3553/3688/1915/3689/3716/5579/3684/2353/65108/1379/5743/4689/4688/653361/2215/1536/1378/2214/7124	25	1
hsa04072	Phospholipase D signaling pathway	42/737	0.003731507	0.016715106	0.011622285	1608/5337/8527/2778/5595/7249/5296/2549/2916/5737/2914/5605/196883/5156/5330/109/1950/23533/56034/2768/1956/5331/2911/5578/114/9162/56894/115/3577/107/552/2915/5293/111/3265/2885/57121/123745/2917/26052/27128/255189	42	1
hsa04723	Retrograde endocannabinoid signaling	42/737	0.003731507	0.016715106	0.011622285	22999/2775/57084/3710/140679/5595/57030/2557/2771/1268/2891/3709/5582/196883/5330/109/773/2559/2561/774/5331/775/2893/2911/5578/114/2776/3763/222236/115/107/2562/5579/2786/2915/111/2788/2567/2558/4697/5743/2793	42	1
hsa04728	Dopaminergic synapse	38/737	0.004333398	0.019148935	0.013314566	815/5522/5527/2775/2778/3710/2771/2891/5533/3709/5582/1644/5519/5330/2774/773/6531/774/1813/5331/775/2893/5578/2776/5521/3763/90993/6571/5579/2786/3800/1816/163688/2353/111/2788/2904/2793	38	1
hsa04913	Ovarian steroidogenesis	18/737	0.004697727	0.020349868	0.014149595	240/2778/3292/196883/3949/109/3973/1545/3480/6770/654/114/115/107/111/123745/5743/255189	18	1
hsa04640	Hematopoietic cell lineage	30/737	0.004752097	0.020349868	0.014149595	952/928/960/3655/921/3552/3676/7850/2322/3553/2056/925/912/290/3684/947/1436/1379/2812/3690/3675/933/951/945/1441/948/917/916/1378/7124	30	1
hsa05135	Yersinia infection	39/737	0.004791865	0.020349868	0.014149595	8935/5606/9564/6196/9138/5829/4792/4773/8874/5595/5296/10096/3676/3553/5605/7186/10095/4772/10451/5879/834/9815/3688/3606/925/9844/2776/7410/2353/5293/10458/6714/7454/3937/2533/4210/6347/7535/7124	39	1
hsa04061	Viral protein interaction with cytokine and cytokine receptor	30/737	0.005577902	0.023088279	0.016053656	10344/53832/7132/8797/1235/1236/58985/3606/643/3577/53833/1436/6347/5197/3587/8807/729230/6372/146433/1234/1230/1524/7124/6351/6359/9560/388372/6349/414062/6358	30	1
hsa04933	AGE-RAGE signaling pathway in diabetic complications	30/737	0.005577902	0.023088279	0.016053656	50507/4313/5595/5296/1277/3552/2152/3553/4772/1284/5879/5330/51196/5331/7424/2308/5578/7412/5579/4088/5581/5293/596/3265/5333/1282/6347/113026/1536/7124	30	1
hsa05143	African trypanosomiasis	14/737	0.006019505	0.024604728	0.017108067	3910/3553/5582/5330/5331/3606/5578/2776/7412/5579/2150/3040/3039/7124	14	1
hsa04066	HIF-1 signaling pathway	32/737	0.006137107	0.02477573	0.017226968	1387/4843/5214/815/8569/285/51378/2321/5595/5296/3945/6513/1026/5582/5605/2056/7428/1950/3480/1956/284/5578/80201/3099/5579/5209/5293/596/1978/3162/3101/1536	32	1
hsa05218	Melanoma	23/737	0.006280908	0.025047035	0.017415611	2255/27006/2249/2260/2254/5595/5296/4233/2253/2246/1026/5605/5156/2250/1950/3480/56034/1956/9965/5293/3265/2248/4286	23	1
hsa05215	Prostate cancer	29/737	0.006705066	0.026416346	0.018367715	1387/2263/2260/3320/2950/4792/4318/5595/5296/7850/1026/5605/5156/1950/3480/56034/1956/6934/2308/83439/2078/90993/5293/596/3265/2885/7113/6716/4314	29	1
hsa04912	GnRH signaling pathway	28/737	0.006882338	0.026791958	0.018628884	5606/815/5337/4313/2778/3710/5595/3709/5605/196883/5330/109/1956/5331/775/5578/114/2776/115/107/5579/163688/111/3265/2885/123745/6714/255189	28	1
hsa04976	Bile secretion	27/737	0.007049658	0.027120449	0.018857289	5244/1244/6550/2778/6548/343/6513/482/196883/3949/109/2052/114/115/476/107/54578/1581/111/6256/54575/480/481/64241/1576/54658/54576	27	1
hsa05030	Cocaine addiction	17/737	0.007201525	0.027382544	0.019039529	2778/2906/2771/2891/2354/1644/6531/1813/90993/26086/2905/6571/111/627/2902/116443/2904	17	1
hsa05226	Gastric cancer	41/737	0.007381366	0.027743757	0.019290686	51384/1496/2263/2255/27006/2249/2254/5595/8312/5296/4233/1855/2253/2549/11211/2246/10297/7475/1026/5605/2250/1950/1956/6934/83439/89780/4041/9965/7015/6469/4088/8313/5293/596/3265/2885/6256/2248/1015/83998/7477	41	1
hsa04022	cGMP-PKG signaling pathway	45/737	0.007786171	0.028763972	0.020000058	7419/3710/4773/5595/2771/4985/4209/6543/148/5533/3764/3709/5605/482/196883/4772/1910/5330/109/8654/23533/2768/5331/775/2977/114/2776/3778/90993/115/4880/476/107/3667/163688/147/5581/146/5139/111/6546/155/4624/480/481	45	1
hsa01522	Endocrine resistance	29/737	0.007828726	0.028763972	0.020000058	4313/2778/10683/2099/638/4318/5595/5296/1031/1026/5605/196883/109/3480/1956/4851/114/115/107/2353/5293/596/111/3265/2885/6667/6714/28514/4855	29	1
hsa04530	Tight junction	45/737	0.00974596	0.03541032	0.024621372	51208/87/5522/23370/79784/51422/11149/10096/9181/9414/10095/3996/4629/9071/5879/5519/57530/3688/1740/9223/58494/9073/7074/5521/912/50848/861/23562/149461/154810/51762/5581/11346/7122/6714/4217/7454/54566/92359/91862/153562/79861/3059/1366/1364	45	1
hsa04919	Thyroid hormone signaling pathway	34/737	0.009975111	0.035844629	0.024923354	1387/5214/8648/6548/2099/5595/7249/5296/6513/652/5582/5605/482/5330/51196/4851/5331/2308/5578/476/5579/5293/10231/3265/6256/5333/6714/4624/4855/3690/480/481/113026/1734	34	1
hsa04330	Notch signaling pathway	19/737	0.011271134	0.040061529	0.027855433	1387/7089/10683/3955/1855/23220/11317/6310/7090/5664/4851/1487/26508/84441/9612/55534/28514/4855/171558	19	1
hsa04070	Phosphatidylinositol signaling system	28/737	0.012623304	0.044385167	0.030861729	9108/1608/3632/51447/8527/8871/8898/3710/3705/54928/5296/3709/5582/5287/3706/5330/51196/5331/3628/5578/9162/5579/163688/5293/5333/22876/113026/1040	28	1
hsa04923	Regulation of lipolysis in adipocytes	18/737	0.016556424	0.056988954	0.039625347	5733/2778/5742/5296/2771/4852/196883/109/114/115/4886/107/3667/5293/111/57104/155/5743	18	1
hsa00230	Purine metabolism	35/737	0.017683163	0.060233274	0.041881175	954/5141/22978/5143/10846/8622/5144/1716/5136/84618/196883/272/109/8654/5149/55811/2977/5137/114/7498/115/107/124583/6241/5139/111/5142/377841/2272/353/51816/9615/50940/205/5148	35	1
hsa04390	Hippo signaling pathway	41/737	0.018248376	0.061517722	0.042774273	51384/25937/1496/11186/23291/2736/5522/7161/4092/8312/6788/268/1855/11211/896/2246/23286/10297/7475/894/652/3996/5519/122786/151449/286204/6934/1740/83439/654/89780/392255/5521/3689/4088/8313/166824/659/374/3397/7477	41	1
hsa04260	Cardiac muscle contraction	25/737	0.018801428	0.062735378	0.043620929	9254/6548/59284/6543/7139/482/59285/59283/7170/93589/775/1339/55799/70/476/783/7171/7386/6546/4624/6262/10368/480/481/125965	25	1
hsa05146	Amoebiasis	28/737	0.024655547	0.08026376	0.055808699	4843/10319/3909/87/2778/3912/284217/5296/1277/3910/7850/3553/5582/1284/5330/2774/5331/5578/2776/912/3689/107/5579/3684/5293/1282/3914/7124	28	1
hsa05417	Lipid and atherosclerosis	53/737	0.024790947	0.08026376	0.055808699	5452/5606/841/7132/815/9138/3320/4792/4318/4773/5595/8797/5296/5533/3553/7186/3949/4772/7187/10451/5879/834/5330/5331/3606/5578/7410/7412/163688/2353/5293/596/10333/3265/2081/6256/6714/1555/4217/3305/4067/4689/6347/4688/948/1559/4314/653361/1536/4312/7124/6349/414062	53	1
hsa04371	Apelin signaling pathway	36/737	0.026150133	0.083834249	0.058291318	4843/9759/4842/6548/3710/5595/51422/10014/2771/4209/6543/3709/5605/196883/5330/109/23533/55811/5331/114/2776/115/107/4088/2786/163688/5581/111/3265/2788/6546/6261/440738/6262/6263/2793	36	1
hsa04978	Mineral absorption	18/737	0.027882231	0.088519317	0.061548922	6550/2512/3163/6543/4502/482/30061/55630/476/340024/6546/142680/3162/480/481/261729/26872/341208	18	1
hsa05418	Fluid shear stress and atherosclerosis	36/737	0.029008544	0.091209555	0.063419488	4257/2817/7132/3320/2950/4313/4318/5296/3552/7850/6382/9181/1843/652/3553/3791/5879/8878/7412/4880/6383/163688/2353/5293/596/1728/6714/4217/659/3690/119391/3162/6347/4688/653361/7124	36	1
hsa04625	C-type lectin receptor signaling pathway	28/737	0.031427913	0.097875499	0.068054427	841/3710/4792/4773/5595/5296/51561/868/5533/1959/3709/3553/4046/4772/834/8844/5058/163688/5293/3265/1960/6714/5743/51266/26253/338339/64581/7124	28	1
hsa04392	Hippo signaling pathway - multiple species	10/737	0.036979998	0.114079806	0.079321546	25937/11186/6788/23286/122786/5058/166824/79633/54798/83937	10	1
hsa05216	Thyroid cancer	12/737	0.037558457	0.114781453	0.079809412	5595/1026/7849/5605/7170/6934/83439/5979/3265/6256/4914/8031	12	1
hsa05130	Pathogenic Escherichia coli infection	48/737	0.038021162	0.115119631	0.080044553	26999/841/51208/7132/9138/4792/5595/8797/79784/10096/9181/3553/7186/10095/4629/9071/5879/834/4651/2768/5058/3688/3606/9073/4643/23562/149461/2353/10458/7122/57121/203068/6714/4641/23191/55971/27128/10382/3071/64005/4542/147945/4640/79861/3059/1366/1364/7124	48	1
hsa05217	Basal cell carcinoma	18/737	0.044202355	0.132607065	0.09220385	51384/2736/8312/2737/1855/51684/11211/10297/7475/1026/652/6934/83439/89780/6469/8313/5727/7477	18	1
hsa04370	VEGF signaling pathway	17/737	0.04608755	0.136646274	0.095012378	5829/4773/5595/5296/5533/5582/5605/3791/5879/5578/5579/5293/3265/123745/6714/5743/255189	17	1
hsa05223	Non-small cell lung cancer	20/737	0.046384515	0.136646274	0.095012378	11186/5595/5296/4233/1026/5582/5605/1950/1956/5578/5979/5579/3800/238/5293/3265/2885/6256/2272/83593	20	1
hsa00604	Glycosphingolipid biosynthesis - ganglio series	6/737	0.050042493	0.146106208	0.101590024	29906/6489/8869/81849/2583/8705	6	1
hsa04742	Taste transduction	23/737	0.051258032	0.148330764	0.103136794	954/29850/3710/2557/6337/5136/2914/196883/5330/773/2559/5331/775/2911/5137/114/83756/3350/2558/22953/2550/9033/3352	23	1
hsa04924	Renin secretion	19/737	0.055524104	0.158389662	0.11013091	2778/3710/2771/5136/5533/3709/5330/116/5331/775/2977/5137/2776/3778/1636/163688/5139/111/155	19	1
hsa04340	Hedgehog signaling pathway	16/737	0.055702786	0.158389662	0.11013091	23291/2121/2736/23295/23288/2737/51684/894/50846/6469/596/132884/57758/5727/57154/3549	16	1
hsa05134	Legionellosis	16/737	0.064244501	0.181036908	0.125877908	841/56681/4792/1917/3553/834/3606/1915/3689/3684/664/3297/1379/3305/1378/7124	16	1
hsa05017	Spinocerebellar ataxia	35/737	0.064774674	0.181036908	0.125877908	5685/6095/7419/3710/2259/2906/5296/2891/3709/11317/6310/5582/7186/4654/3748/5330/773/5331/2911/5578/2776/2905/9861/5579/5293/1600/2902/8408/2081/387332/6667/6261/4217/116443/2904	35	1
hsa04152	AMPK signaling pathway	30/737	0.065389618	0.181206823	0.125996053	23216/5214/6720/5522/5527/6319/3172/7249/5296/51422/10645/3953/148/8900/5519/3480/57521/79966/2308/5521/90993/2203/3667/5209/5293/3952/8408/1978/5105/948	30	1
hsa05206	MicroRNAs in cancer	70/737	0.067133173	0.184475189	0.128268601	1387/1591/960/9759/11186/8626/6624/1789/1943/4318/5595/90427/5296/4233/10014/27086/10297/7143/894/8434/1026/5582/5605/3236/5156/10253/1545/57521/1956/4851/6768/8091/5578/89780/4325/85414/10642/5579/7148/3667/9839/23414/5581/5293/596/3265/2885/1946/406904/442891/406918/659/4855/5268/131405/406909/406983/574455/406984/406903/406942/407041/406908/406911/3690/2065/5743/3162/1944/1942	70	1
hsa00650	Butanoate metabolism	9/737	0.07063639	0.192484163	0.133837371	38/65985/1892/2571/2572/54511/622/3158/54988	9	1
hsa05221	Acute myeloid leukemia	18/737	0.075293398	0.203478854	0.141482158	862/5595/5296/7704/2322/5605/8900/6934/83439/861/3684/5293/3265/2885/1436/1978/6688/1053	18	1
hsa03320	PPAR signaling pathway	20/737	0.075949527	0.203569635	0.14154528	8310/10580/6319/28965/6342/2170/376497/9415/79966/10873/2180/1581/4023/6256/5105/3158/948/11001/2172/4312	20	1
hsa04660	T cell receptor signaling pathway	26/737	0.081855021	0.217614567	0.15131095	4792/4773/5595/5296/868/5533/5605/4772/10451/56924/5058/925/7410/2353/5293/3265/2885/5133/84433/3937/5788/7535/917/10125/916/7124	26	1
hsa05210	Colorectal cancer	22/737	0.084352558	0.220871162	0.153575313	5595/8312/5296/4437/10297/1026/5605/5879/1950/1956/6934/83439/4088/8313/2353/5293/596/3265/2885/1630/374/2069	22	1
hsa04664	Fc epsilon RI signaling pathway	18/737	0.084897592	0.220871162	0.153575313	240/5606/5595/5296/5605/10451/5879/5578/7410/5293/3265/2885/123745/4067/695/3937/255189/7124	18	1
hsa04060	Cytokine-cytokine receptor interaction	66/737	0.085731488	0.220871162	0.153575313	10344/53832/7132/8797/268/51561/1235/3552/7850/8808/3953/943/652/3553/1236/2056/4803/91/3557/8792/58985/151449/9180/85480/3606/651/654/392255/643/8741/3577/53833/3952/1436/3556/659/2662/3604/50615/10148/944/6347/5197/3587/8807/1441/729230/6372/3976/9518/269/146433/1234/1230/1524/10663/4050/7124/3455/6351/6359/9560/388372/6349/414062/6358	66	1
hsa00591	Linoleic acid metabolism	9/737	0.085781766	0.220871162	0.153575313	1571/151056/8398/123745/5320/8399/1559/1576/255189	9	1
hsa00592	alpha-Linolenic acid metabolism	8/737	0.087841357	0.224407217	0.15603399	8310/9415/151056/8398/123745/5320/8399/255189	8	1
hsa04071	Sphingolipid signaling pathway	29/737	0.090462664	0.229312334	0.159444598	7132/5522/5337/5527/5595/5296/2771/4985/5582/5605/7186/5879/5519/5330/2768/5331/5578/2776/5521/130367/5579/5581/5293/596/55304/3265/4217/1903/7124	29	1
hsa05211	Renal cell carcinoma	18/737	0.095264705	0.239627374	0.166616812	1387/5595/5296/4233/2889/2549/6513/1026/5605/7428/5879/56924/5058/201163/5293/9915/3265/2885	18	1
hsa05222	Small cell lung cancer	23/737	0.097253769	0.242763224	0.16879722	4843/10319/3909/7188/3912/3655/4792/284217/5296/3910/1026/7186/7187/1284/3688/5293/596/6256/1282/2272/3914/3675/5743	23	1
hsa04973	Carbohydrate digestion and absorption	13/737	0.09857988	0.244209248	0.169802664	5296/482/5330/5331/80201/3099/476/5579/83756/5293/480/481/3101	13	1
hsa00072	Synthesis and degradation of ketone bodies	4/737	0.105505724	0.259401292	0.18036594	38/54511/622/3158	4	1
hsa00790	Folate biosynthesis	8/737	0.106592567	0.260117682	0.180864057	55034/231/4337/249/250/251/248/57016	8	1
hsa00564	Glycerophospholipid metabolism	24/737	0.110464289	0.267569055	0.186045118	11313/10908/1608/1103/5337/8527/1119/129642/55224/23171/9162/56894/5130/151056/162466/81490/8398/5833/123745/5320/8399/1040/122618/255189	24	1
hsa04650	Natural killer cell mediated cytotoxicity	31/737	0.111809192	0.268835337	0.186925584	3683/4773/5595/8797/5296/5533/5582/5605/4772/10451/5879/5058/5578/3689/7410/5579/5293/3265/2885/3106/3937/7535/962/51744/10870/80328/2215/2214/259197/7124/3455	31	1
hsa04211	Longevity regulating pathway	22/737	0.113392408	0.270651952	0.188188706	7249/5296/51422/10645/196883/83667/9365/109/3480/57521/2308/114/90993/115/107/3667/5293/111/3265/8408/79813/1978	22	1
hsa04931	Insulin resistance	26/737	0.116903627	0.277010769	0.192610095	51085/7132/6196/6720/4792/5834/5296/51422/28965/6513/5507/376497/9945/5792/2308/90993/5579/3667/5581/5293/22877/9021/5105/948/11001/7124	26	1
hsa04213	Longevity regulating pathway - multiple species	16/737	0.119899237	0.282065111	0.196124462	5296/51422/196883/109/3480/57521/2308/114/115/107/3667/5293/111/3265/3305/3170	16	1
hsa04613	Neutrophil extracellular trap formation	43/737	0.124491952	0.29077763	0.202182418	3683/9759/7419/5595/5296/10014/7450/6404/5582/5605/5879/834/5330/5331/5578/3689/5579/3684/5293/566/6714/1991/1379/3690/4689/51311/4688/8970/27180/3017/653361/2215/820/1536/2357/64581/8347/8349/51284/128312/1378/2214/8357	43	1
hsa00601	Glycosphingolipid biosynthesis - lacto and neolacto series	8/737	0.127359594	0.291347971	0.202578985	6489/2651/2523/2524/2525/28/10331/10317	8	1
hsa01040	Biosynthesis of unsaturated fatty acids	8/737	0.127359594	0.291347971	0.202578985	8310/11332/6319/6342/6785/9415/79966/54898	8	1
hsa05213	Endometrial cancer	15/737	0.127409051	0.291347971	0.202578985	1496/5595/8312/5296/10297/1026/5605/1950/1956/6934/83439/8313/5293/3265/2885	15	1
hsa04964	Proximal tubule bicarbonate reclamation	7/737	0.133104887	0.301919705	0.209929684	6550/482/476/762/5105/480/481	7	1
hsa00512	Mucin type O-glycan biosynthesis	10/737	0.133878768	0.301919705	0.209929684	26290/2590/114805/9334/55568/442117/50614/11227/9245/10331	10	1
hsa00562	Inositol phosphate metabolism	18/737	0.144411224	0.321477901	0.223528816	9108/3632/8871/8898/3705/9562/5287/3706/5330/51196/9651/5331/3628/5293/5333/22876/23007/113026	18	1
hsa05219	Bladder cancer	11/737	0.144517588	0.321477901	0.223528816	11186/4313/4318/5595/1026/5605/1950/1956/3265/6714/4312	11	1
hsa04920	Adipocytokine signaling pathway	17/737	0.153702306	0.339599013	0.23612872	7132/4792/51422/10645/5443/3953/6513/4852/7186/2180/3667/3952/9021/6256/5105/948/7124	17	1
hsa00534	Glycosaminoglycan biosynthesis - heparan sulfate / heparin	7/737	0.158611486	0.346610079	0.241003628	2137/64131/9956/9953/2131/266722/222537	7	1
hsa04668	TNF signaling pathway	26/737	0.160055419	0.346610079	0.241003628	8837/5606/841/7132/7188/10059/4792/4318/5595/5296/3553/7186/7187/7424/90993/7412/2353/5293/9021/4217/5743/6347/6372/3976/4314/7124	26	1
hsa05145	Toxoplasmosis	26/737	0.160055419	0.346610079	0.241003628	4843/240/5606/10319/3909/841/7132/2775/3912/3655/4792/284217/5595/3910/2771/3949/23533/3688/3716/596/3914/3305/3587/1234/4261/7124	26	1
hsa00051	Fructose and mannose metabolism	9/737	0.163765961	0.352312297	0.244968473	5214/231/2762/80201/3099/2203/5209/3101/57016	9	1
hsa00532	Glycosaminoglycan biosynthesis - chondroitin sulfate / dermatan sulfate	6/737	0.16724601	0.357447354	0.248538962	64131/10090/55501/55790/50515/51363	6	1
hsa04910	Insulin signaling pathway	31/737	0.170783102	0.362636847	0.252147301	3632/6720/8569/10580/5834/5595/7249/5296/51422/2645/2889/868/5507/8835/5605/57521/5792/2308/80201/3099/2203/3667/163688/5293/3265/2885/9021/1978/5575/5105/3101	31	1
hsa04657	IL-17 signaling pathway	22/737	0.173934632	0.365445818	0.254100424	841/3320/7188/4792/4318/5595/727897/3553/2354/7186/7187/3934/2353/225689/5743/6347/6372/4314/8061/4312/4586/7124	22	1
hsa00561	Glycerolipid metabolism	15/737	0.174624978	0.365445818	0.254100424	1608/8527/231/9388/129642/9162/56894/3990/80168/1056/4023/57104/5408/346606/57016	15	1
hsa00730	Thiamine metabolism	5/737	0.175458696	0.365445818	0.254100424	249/250/205/251/248	5	1
hsa04975	Fat digestion and absorption	11/737	0.184515971	0.38187799	0.26552598	38/376497/80168/1056/5320/5408/29881/8399/346606/948/64241	11	1
hsa04722	Neurotrophin signaling pathway	27/737	0.186713078	0.38399482	0.266997847	4145/815/6196/7161/4792/5595/5296/2889/2549/5605/4803/5879/4916/5664/3667/163688/10782/5293/596/3265/627/2885/4908/4217/4914/398/4909	27	1
hsa05133	Pertussis	18/737	0.189059486	0.386390325	0.26866348	4843/5595/51561/2771/3552/725/3553/834/3688/3689/163688/3684/2353/6372/714/713/712/7124	18	1
hsa05166	Human T-cell leukemia virus 1 infection	47/737	0.206658741	0.419735456	0.291848892	8379/1387/3683/7132/6929/7419/4792/4773/5595/55697/5296/896/7850/6513/894/5533/1959/1031/1026/5605/196883/4772/8900/109/9184/114/2114/90993/3689/115/3716/4487/7015/107/4088/2353/5293/111/3265/387332/3106/6688/4488/917/8061/916/7124	47	1
hsa00830	Retinol metabolism	16/737	0.214814919	0.433607893	0.301494624	56603/54905/1592/1562/8854/9249/54578/195814/1555/54575/1577/53630/1559/1576/54658/54576	16	1
hsa04115	p53 signaling pathway	17/737	0.218734107	0.438810141	0.305111831	84883/841/7161/3732/7249/8797/896/894/1026/83667/3486/596/6241/2810/56475/5268/64065	17	1
hsa00980	Metabolism of xenobiotics by cytochrome P450	18/737	0.222188197	0.443021587	0.308040118	4257/2950/218/1571/222/1545/2052/54578/1555/246181/54575/119391/1577/1559/1576/22977/54658/54576	18	1
hsa00410	beta-Alanine metabolism	8/737	0.228215552	0.45109553	0.313654063	8310/218/1892/2571/222/55748/2572/1807	8	1
hsa02010	ABC transporters	11/737	0.228996508	0.45109553	0.313654063	5244/1244/85320/94160/23457/21/6890/64241/26154/225/154664	11	1
hsa04979	Cholesterol metabolism	12/737	0.235328814	0.460793545	0.32039725	7419/9388/4035/3949/341/6770/3990/1581/4023/348/948/64241	12	1
hsa05235	PD-L1 expression and PD-1 checkpoint pathway in cancer	20/737	0.244569352	0.476036774	0.330996116	5606/4792/4773/5595/5296/5533/5605/4772/1950/1956/3716/2353/238/5293/3265/5133/7535/917/10125/916	20	1
hsa05225	Hepatocellular carcinoma	36/737	0.246447959	0.476854926	0.33156499	51384/4257/57492/51412/2950/5595/8312/5296/4233/1855/2549/11211/10297/7475/1026/5582/5605/3480/1956/6934/83439/5578/89780/4041/55193/7015/5579/4088/8313/5293/3265/2885/1728/119391/3162/7477	36	1
hsa04064	NF-kappa B signaling pathway	23/737	0.249949925	0.480786031	0.334298351	8837/7132/7188/29775/4792/3553/7186/7187/8792/142/7412/5579/596/84433/4067/695/5743/7535/4050/7124/6351/9560/388372	23	1
hsa04917	Prolactin signaling pathway	16/737	0.252342427	0.482549554	0.335524557	2099/5595/5296/2645/894/8835/5605/2001/3973/8792/2353/5293/3265/2885/9021/6714	16	1
hsa05214	Glioma	17/737	0.255198557	0.485174001	0.337349378	815/5595/5296/1026/5582/5605/5156/1950/3480/1956/5578/5579/163688/5293/3265/2885/57118	17	1
hsa04914	Progesterone-mediated oocyte maturation	22/737	0.264680552	0.500246119	0.347829267	8379/6196/6793/3320/5241/5595/5296/22849/2771/10459/9088/196883/8900/109/3480/114/115/107/5293/4342/111/64506	22	1
hsa00590	Arachidonic acid metabolism	14/737	0.266186008	0.500246119	0.347829267	240/5742/1571/151056/8398/123745/5320/1555/8399/5743/1559/255189/2877/4051	14	1
hsa00860	Porphyrin and chlorophyll metabolism	10/737	0.298371649	0.557528738	0.387658804	211/2235/3163/54578/54575/3162/212/341208/54658/54576	10	1
hsa05323	Rheumatoid arthritis	20/737	0.315450316	0.583354291	0.405615731	3683/2321/10312/51561/3552/3553/8792/3606/284/3689/8741/2353/6347/6372/4314/4312/4050/7124/6349/414062	20	1
hsa00040	Pentose and glucuronate interconversions	8/737	0.317524414	0.583354291	0.405615731	231/9365/51084/54578/54575/57016/54658/54576	8	1
hsa00603	Glycosphingolipid biosynthesis - globo and isoglobo series	4/737	0.318396022	0.583354291	0.405615731	6489/2523/2524/10317	4	1
hsa05203	Viral carcinogenesis	42/737	0.319328496	0.583354291	0.405615731	8379/1387/841/9759/87/7419/7188/5829/4792/5595/55697/5296/10014/896/894/1959/11317/1026/7186/23352/7187/8900/5879/2960/90993/3716/5293/3265/2885/1960/387332/6714/27044/3106/4067/85477/8970/3017/1234/8347/8349/128312	42	1
hsa00565	Ether lipid metabolism	11/737	0.328034952	0.595930163	0.414359939	5337/79153/151056/7368/8398/123745/5320/8399/7941/122618/255189	11	1
hsa05204	Chemical carcinogenesis - DNA adducts	15/737	0.333245362	0.602051013	0.418615866	4257/2950/1562/1571/1545/2052/54578/54575/119391/5743/1577/1559/1576/54658/54576	15	1
hsa04144	Endocytosis	51/737	0.345725008	0.621165261	0.431906314	5662/29924/2263/5337/832/273/55616/51324/9727/30844/10938/131890/868/10096/10254/64411/10617/3949/10095/84440/27183/377/5156/9815/79720/3480/6457/6455/23624/9922/1956/8853/23362/116987/51160/3577/4088/3800/254122/3265/80230/161/6714/26052/57154/2869/3305/3106/55040/27128/1234	51	1
hsa00430	Taurine and hypotaurine metabolism	3/737	0.352860774	0.63052171	0.438412005	2571/1036/2572	3	1
hsa05160	Hepatitis C	32/737	0.371869903	0.657580882	0.457226687	8837/841/51208/7132/5522/4792/5595/5296/1026/5605/7186/3949/7187/9071/5519/1950/1956/9073/5521/23562/3716/149461/5293/3265/2885/7122/9021/6256/1366/1364/7124/3455	32	1
hsa05150	Staphylococcus aureus infection	20/737	0.372025881	0.657580882	0.457226687	3683/6404/5648/3689/5724/3684/719/390792/2213/3875/714/2215/820/2357/3880/3866/3860/713/712/2214	20	1
hsa00052	Galactose metabolism	7/737	0.379143011	0.66245143	0.460613259	5214/231/2645/80201/3099/3101/57016	7	1
hsa00140	Steroid hormone biosynthesis	13/737	0.379405355	0.66245143	0.460613259	3292/79644/1571/1545/54578/1581/54575/6716/1577/1576/1109/54658/54576	13	1
hsa04216	Ferroptosis	9/737	0.380858926	0.66245143	0.460613259	7419/2512/30061/2180/440738/8031/3162/23657/1536	9	1
hsa04659	Th17 cell differentiation	22/737	0.387864775	0.671067627	0.466604241	6095/30009/3320/4792/4773/5595/2625/51561/5533/3553/4772/3662/861/3716/4088/2353/6256/3556/50615/7535/917/916	22	1
hsa04658	Th1 and Th2 cell differentiation	19/737	0.393022749	0.676412836	0.470320852	864/30009/10683/4792/4773/5595/2625/5533/11317/4772/4851/3716/2353/84441/55534/28514/7535/917/916	19	1
hsa05100	Bacterial invasion of epithelial cells	16/737	0.398327828	0.681453225	0.473825516	9564/1496/5829/5296/4233/2549/10096/10459/10095/5879/3688/9844/5293/6714/26052/3059	16	1
hsa01212	Fatty acid metabolism	12/737	0.405491401	0.684518249	0.475956677	38/8310/6319/6342/6785/1892/9415/79966/54995/2180/54898/9374	12	1
hsa05152	Tuberculosis	36/737	0.4086227	0.684518249	0.475956677	1387/4843/9902/841/7132/815/11151/5595/10312/51561/3552/5533/3553/4046/8844/3606/1054/3689/3716/163688/3684/596/10333/6714/1379/2213/3587/3687/2215/820/26253/64581/4261/1378/2214/7124	36	1
hsa00514	Other types of O-glycan biosynthesis	10/737	0.408952603	0.684518249	0.475956677	3955/26290/2590/84620/114805/55568/442117/50614/23275/11227	10	1
hsa00120	Primary bile acid biosynthesis	4/737	0.413486475	0.684518249	0.475956677	6342/9023/1581/1109	4	1
hsa00360	Phenylalanine metabolism	4/737	0.413486475	0.684518249	0.475956677	259307/218/1644/222	4	1
hsa00340	Histidine metabolism	5/737	0.41447894	0.684518249	0.475956677	218/222/55748/3176/26	5	1
hsa04150	mTOR signaling pathway	31/737	0.419627225	0.689041962	0.479102088	51384/7132/6196/5595/7249/8140/5296/2887/1855/11211/7475/6446/79109/5582/5605/83667/3480/57521/5578/89780/201163/4041/5579/3667/5293/3265/8408/2885/1978/7477/7124	31	1
hsa05022	Pathways of neurodegeneration - multiple diseases	93/737	0.421432392	0.689041962	0.479102088	51384/4843/5606/5685/841/7132/815/7419/50507/4842/3710/4744/5595/8312/27121/4741/147700/2906/1855/11211/3552/10297/1768/7475/6390/2891/5533/3709/6310/3553/3831/5582/5605/7186/7326/5879/5330/6531/5664/6622/774/5331/775/2893/2911/5578/7345/89780/27123/2776/9246/1339/8878/2905/4041/824/9861/5579/3800/8313/2915/7386/163688/2861/596/3265/627/2902/8408/2081/4137/8632/4697/6261/203068/3064/4217/440738/6…	93	1
hsa04620	Toll-like receptor signaling pathway	21/737	0.427406145	0.695332384	0.483475922	5606/841/4792/5595/5296/3553/5605/7187/5879/2353/5293/10333/51311/51284/7124/3455/6351/9560/388372/6349/414062	21	1
hsa04210	Apoptosis	27/737	0.446108462	0.722165679	0.502133548	8837/841/7132/3710/4792/143/5595/8797/5296/3709/5605/7186/4803/8739/142/824/2353/5293/596/3265/84823/2081/4217/4914/1519/79861/7124	27	1
hsa04614	Renin-angiotensin system	5/737	0.455513597	0.733758355	0.510194124	5550/1636/290/59272/1359	5	1
hsa04610	Complement and coagulation cascades	17/737	0.460033461	0.737406577	0.512730793	2155/7450/2152/725/5648/3689/3684/719/5265/1379/2161/3687/714/713/712/2153/1378	17	1
hsa04922	Glucagon signaling pathway	21/737	0.484306633	0.772528141	0.537151387	1387/5214/815/2778/3710/5834/51422/2645/3945/6513/5533/3709/5330/150094/5331/2308/2776/90993/2203/163688/5105	21	1
hsa05170	Human immunodeficiency virus 1 infection	41/737	0.493204648	0.782902524	0.544364865	5606/841/7132/23291/7188/2775/5829/3710/4792/4773/5595/5296/2771/5533/3709/5582/5605/7186/200315/4772/5879/56924/5058/5578/2776/5579/2786/6890/163688/2353/5293/596/3265/2788/3106/10053/917/1234/2793/916/7124	41	1
hsa04114	Oocyte meiosis	25/737	0.504014104	0.794464466	0.552404071	8379/10734/815/6196/23291/5527/5241/3710/5595/22849/10459/5533/3709/9088/196883/5519/109/3480/114/115/107/163688/4342/111/64506	25	1
hsa01210	2-Oxocarboxylic acid metabolism	4/737	0.505347428	0.794464466	0.552404071	586/84706/2875/3418	4	1
hsa05034	Alcoholism	36/737	0.509530174	0.797207497	0.554311345	84254/9759/2775/2778/5595/2906/10014/10645/2771/4852/2354/1644/6531/1392/1813/90993/2905/6571/2786/163688/111/3265/2788/627/2902/2885/116443/2904/8970/3017/2793/136/8347/8349/128312/8357	36	1
hsa00760	Nicotinate and nicotinamide metabolism	7/737	0.514122242	0.800561777	0.556643631	952/65220/22978/51548/84618/4837/51547	7	1
hsa04630	JAK-STAT signaling pathway	31/737	0.528205336	0.818593103	0.569181105	1387/53832/5296/51561/896/10254/3953/894/8835/1026/2056/5156/1950/58985/9180/85480/1956/3716/116379/5293/596/53833/3952/3265/2885/9021/50615/3587/1441/3976/3455	31	1
hsa05167	Kaposi sarcoma-associated herpesvirus infection	37/737	0.534256435	0.82406535	0.572986048	1387/841/7132/285/3710/4792/4773/3055/5595/5296/5533/3709/1026/5605/7186/4772/7187/5879/23533/6934/83439/3716/2786/163688/2353/5293/3265/2788/6714/440738/3106/4067/5743/1234/1230/2793/3455	37	1
hsa05131	Shigellosis	47/737	0.538770226	0.827126122	0.575114252	960/9564/7132/87/23291/7188/5829/3710/4792/5595/5296/10096/9181/3709/3553/7186/10095/5879/834/5330/51196/57521/1956/5331/3688/3606/2308/9844/80201/3099/8878/824/5581/5293/596/664/5333/345456/6714/440738/25851/27128/3101/113026/3059/7124/8357	47	1
hsa00350	Tyrosine metabolism	7/737	0.54641422	0.834580318	0.580297276	259307/218/1644/222/3081/7173/5409	7	1
hsa05010	Alzheimer disease	70/737	0.548730179	0.834580318	0.580297276	51384/4843/5685/841/7132/7419/50507/4842/3710/5595/8312/27121/147700/2906/5296/1855/11211/3552/10297/7475/6390/5533/3709/4035/10888/3553/3831/5605/7186/5330/102/5664/6622/5331/775/89780/27123/2776/1339/2905/4041/824/9861/3800/8313/2915/7386/3667/163688/5293/3265/4023/2902/8408/2081/23621/4137/4697/203068/4217/6263/2904/5743/10382/348/125965/1536/79861/7477/7124	70	1
hsa00380	Tryptophan metabolism	8/737	0.566041434	0.856923838	0.595833089	38/259307/8942/1892/1644/1545/26/8564	8	1
hsa00250	Alanine, aspartate and glutamate metabolism	7/737	0.577762082	0.87063687	0.605367983	259307/2571/9945/2572/84706/2875/339983	7	1
hsa00280	Valine, leucine and isoleucine degradation	9/737	0.583265656	0.874898484	0.608331152	586/38/65985/259307/11112/1892/54511/5095/3158	9	1
hsa05120	Epithelial cell signaling in Helicobacter pylori infection	13/737	0.593693085	0.880021129	0.611893011	4792/1445/4233/10312/5879/102/1956/5058/58494/50848/3577/6714/4067	13	1
hsa04940	Type I diabetes mellitus	8/737	0.59478734	0.880021129	0.611893011	5798/3552/3553/2571/2572/5799/3106/7124	8	1
hsa00920	Sulfur metabolism	2/737	0.596689564	0.880021129	0.611893011	54928/4357	2	1
hsa04218	Cellular senescence	29/737	0.598225996	0.880021129	0.611893011	5606/23291/7419/3710/4773/5595/7249/5296/896/3552/894/5533/3709/1026/5605/4772/8900/3486/2308/8878/824/4088/163688/5293/3265/286826/1978/3106/83593	29	1
hsa05321	Inflammatory bowel disease	12/737	0.602727645	0.880021129	0.611893011	6095/30009/2625/51561/3552/3553/4772/3606/4088/50615/8807/7124	12	1
hsa05340	Primary immunodeficiency	7/737	0.608028936	0.880021129	0.611893011	925/6890/695/5788/7535/4261/916	7	1
hsa00062	Fatty acid elongation	5/737	0.608210321	0.880021129	0.611893011	11332/6785/1892/54898/9374	5	1
hsa04966	Collecting duct acid secretion	5/737	0.608210321	0.880021129	0.611893011	495/10312/10723/496/6521	5	1
hsa00220	Arginine biosynthesis	4/737	0.629240257	0.906438608	0.630261514	4843/4842/84706/2875	4	1
hsa00130	Ubiquinone and other terpenoid-quinone biosynthesis	2/737	0.65087374	0.933489969	0.649070766	51805/1728	2	1
hsa00640	Propanoate metabolism	6/737	0.654111151	0.934036447	0.649450741	38/8310/79611/3945/1892/5095	6	1
hsa00910	Nitrogen metabolism	3/737	0.657421911	0.934682456	0.649899921	761/762/768	3	1
hsa00330	Arginine and proline metabolism	9/737	0.660399156	0.934850753	0.650016941	4843/4842/1610/55748/29920/283208/26/548596/1159	9	1
hsa04744	Phototransduction	5/737	0.674514846	0.950717046	0.661049033	2978/131890/2779/163688/5148	5	1
hsa05161	Hepatitis B	29/737	0.684042317	0.960007887	0.667509106	1387/5606/841/7419/4792/4318/4773/5595/5296/1959/1026/5582/5605/4772/7187/8900/5578/90993/3716/5579/4088/2353/5293/596/3265/2885/1960/6714/7124	29	1
hsa04145	Phagosome	27/737	0.696218791	0.972337087	0.676081799	9902/4842/11151/1311/10312/7060/5879/3688/3689/6890/3684/10333/7058/203068/3106/3690/2213/4689/10382/4688/948/653361/2215/1536/64581/79861/2214	27	1
hsa00020	Citrate cycle (TCA cycle)	5/737	0.704721375	0.972337087	0.676081799	6390/5091/3418/55753/5105	5	1
hsa00030	Pentose phosphate pathway	5/737	0.704721375	0.972337087	0.676081799	51071/5214/2203/64080/6888	5	1
hsa00053	Ascorbate and aldarate metabolism	5/737	0.704721375	0.972337087	0.676081799	9365/54578/54575/54658/54576	5	1
hsa04068	FoxO signaling pathway	23/737	0.709039942	0.97418513	0.677366773	1387/51701/5595/9455/5296/51422/6446/894/1026/5605/1950/3480/1956/2308/2911/4088/3667/5293/3265/2290/664/2885/5105	23	1
hsa00520	Amino sugar and nucleotide sugar metabolism	8/737	0.722493091	0.988515651	0.687331018	2645/2762/80146/9945/80201/3099/1118/3101	8	1
hsa00531	Glycosaminoglycan degradation	3/737	0.732800589	0.989819502	0.688237607	3425/60495/8372	3	1
hsa04710	Circadian rhythm	5/737	0.732913253	0.989819502	0.688237607	6095/23291/51422/8553/4862	5	1
hsa05416	Viral myocarditis	10/737	0.734500873	0.989819502	0.688237607	3683/841/8672/284217/1981/5879/27/3689/4624/3106	10	1
hsa04932	Non-alcoholic fatty liver disease	27/737	0.735553942	0.989819502	0.688237607	51085/841/7132/6720/5296/51422/3552/3953/6390/3553/7186/1571/5879/1339/7386/3667/2353/5293/3952/22877/2081/9021/6256/4697/4217/125965/7124	27	1
hsa05132	Salmonella infection	44/737	0.744574915	0.997852448	0.693823044	5606/26999/841/7132/3320/4792/5595/8797/147700/10096/79026/3553/3831/5605/7186/5420/10095/5287/55207/5879/834/127829/6934/5058/3606/83439/9844/3800/2353/5293/596/10333/3265/302/203068/345456/6281/23191/5788/27128/10382/3071/79861/7124	44	1
hsa00010	Glycolysis / Gluconeogenesis	11/737	0.75858943	1	0.695316272	5214/2645/9562/218/3945/222/80201/3099/2203/5105/3101	11	1
hsa01524	Platinum drug resistance	12/737	0.763325199	1	0.695316272	4257/1244/841/2950/5595/5296/4437/1026/5293/596/4217/119391	12	1
hsa00270	Cysteine and methionine metabolism	8/737	0.765198209	1	0.695316272	586/1789/259307/3945/4357/1036/23743/875	8	1
hsa05110	Vibrio cholerae infection	8/737	0.765198209	1	0.695316272	3784/2778/10312/9414/109/5578/115/11015	8	1
hsa00100	Steroid biosynthesis	3/737	0.765267905	1	0.695316272	1591/7108/1056	3	1
hsa00533	Glycosaminoglycan biosynthesis - keratan sulfate	2/737	0.778920969	1	0.695316272	10164/9435	2	1
hsa03410	Base excision repair	5/737	0.78329476	1	0.695316272	4913/143/4595/142/27343	5	1
hsa00983	Drug metabolism - other enzymes	13/737	0.783713948	1	0.695316272	4257/2950/1571/1807/7498/54578/7083/6241/54575/119391/1576/54658/54576	13	1
hsa01200	Carbon metabolism	19/737	0.794343751	1	0.695316272	5214/38/8310/2645/6390/1892/10873/80201/3099/2203/84706/2875/5091/5095/6888/2731/3418/55753/3101	19	1
hsa05164	Influenza A	29/737	0.802230193	1	0.695316272	1387/841/7132/4792/5595/8797/5296/896/3552/3553/5605/7187/834/3606/5578/3716/5579/5293/7113/9021/5646/6347/56649/7177/4261/51284/64499/7124/3455	29	1
hsa05220	Chronic myeloid leukemia	12/737	0.810316134	1	0.695316272	2122/4792/5595/5296/1026/5605/861/1487/4088/5293/3265/2885	12	1
hsa04146	Peroxisome	13/737	0.812838722	1	0.695316272	4843/8310/1610/51555/6342/5195/54511/2180/5192/7498/3418/11001/225	13	1
hsa04621	NOD-like receptor signaling pathway	31/737	0.81953162	1	0.695316272	841/7419/3320/7188/10059/3710/4792/5595/24145/3709/3553/7186/7187/834/5330/5331/3606/3716/115361/596/171389/440738/5027/4210/6347/9051/91662/820/1536/7124/3455	31	1
hsa00770	Pantothenate and CoA biosynthesis	3/737	0.82053239	1	0.695316272	586/60490/1807	3	1
hsa00900	Terpenoid backbone biosynthesis	3/737	0.82053239	1	0.695316272	38/23463/3158	3	1
hsa00620	Pyruvate metabolism	7/737	0.820593355	1	0.695316272	38/3945/2739/10873/197257/5091/5105	7	1
hsa04217	Necroptosis	26/737	0.839832946	1	0.695316272	8837/841/7132/815/7419/3320/7188/2512/10059/5834/8797/3552/3553/7186/27183/834/142/8878/3716/824/596/123745/1536/255189/7124/3455	26	1
hsa00500	Starch and sucrose metabolism	5/737	0.844624811	1	0.695316272	5834/2645/80201/3099/3101	5	1
hsa05020	Prion disease	46/737	0.851772025	1	0.695316272	5685/7419/3710/5595/147700/2906/5296/3552/6390/5533/3709/3553/3831/5879/4851/774/4684/775/4685/1339/90993/2905/9861/3800/7386/5293/2902/4697/6261/203068/6262/116443/6263/3305/2904/4689/10382/4688/653361/714/125965/1536/713/712/79861/7124	46	1
hsa01240	Biosynthesis of cofactors	25/737	0.863342934	1	0.695316272	65220/211/586/2235/8942/4337/51805/60490/54995/8566/9249/249/250/54578/195814/1728/54575/8564/53630/212/205/251/248/54658/54576	25	1
hsa00240	Pyrimidine metabolism	8/737	0.864453723	1	0.695316272	22978/84618/1807/7083/124583/6241/79077/377841	8	1
hsa00480	Glutathione metabolism	8/737	0.877114767	1	0.695316272	4257/2950/2936/290/6241/3418/119391/2877	8	1
hsa00061	Fatty acid biosynthesis	2/737	0.884696554	1	0.695316272	54995/2180	2	1
hsa00513	Various types of N-glycan biosynthesis	5/737	0.890862197	1	0.695316272	11320/7991/57134/64377/283358	5	1
hsa04130	SNARE interactions in vesicular transport	4/737	0.899705611	1	0.695316272	112755/143187/10791/6804	4	1
hsa00260	Glycine, serine and threonine metabolism	5/737	0.90338613	1	0.695316272	211/1610/875/2731/212	5	1
hsa05415	Diabetic cardiomyopathy	32/737	0.908510147	1	0.695316272	815/7419/4313/4318/2936/5296/1277/6390/6513/5582/9945/5879/5330/142/5331/5578/1339/1636/5579/4088/7386/3667/5293/6667/4697/6262/4689/4688/948/653361/125965/1536	32	1
hsa05169	Epstein-Barr virus infection	31/737	0.931883251	1	0.695316272	3683/864/960/5606/841/7188/4792/5296/896/965/894/11317/1026/7186/7187/8900/5879/3716/9861/6890/5293/596/377841/9612/3106/4067/695/917/916/7124/3455	31	1
hsa00310	Lysine degradation	8/737	0.934106179	1	0.695316272	93166/38/2122/1892/63976/5352/79813/64754	8	1
hsa04623	Cytosolic DNA-sensing pathway	8/737	0.934106179	1	0.695316272	4792/3553/834/3606/51082/6351/9560/388372	8	1
hsa00510	N-Glycan biosynthesis	6/737	0.935537306	1	0.695316272	11320/7991/57134/79644/84620/4249	6	1
hsa03450	Non-homologous end-joining	1/737	0.936609707	1	0.695316272	27343	1	1
hsa04962	Vasopressin-regulated water reabsorption	5/737	0.941764295	1	0.695316272	2778/109/90993/115/398	5	1
hsa05162	Measles	20/737	0.941834952	1	0.695316272	841/7161/4792/5296/896/868/3552/894/3553/7187/3716/2353/5293/596/3305/2213/917/51284/916/3455	20	1
hsa00630	Glyoxylate and dicarboxylate metabolism	3/737	0.944400141	1	0.695316272	38/5095/2731	3	1
hsa04137	Mitophagy - animal	9/737	0.949641804	1	0.695316272	8878/3265/664/8408/285973/6667/4286/6714/440738	9	1
hsa01523	Antifolate resistance	3/737	0.952394881	1	0.695316272	1244/3553/7124	3	1
hsa05171	Coronavirus disease - COVID-19	35/737	0.955223679	1	0.695316272	7132/6160/4792/5595/5296/7450/3553/5582/5648/7187/834/6189/1956/5578/6156/1636/3716/5579/2353/5293/719/7113/6147/51311/6347/59272/4314/714/1536/713/712/4312/51284/7124/3455	35	1
hsa04977	Vitamin digestion and absorption	2/737	0.959077411	1	0.695316272	151056/113278	2	1
hsa04215	Apoptosis - multiple species	3/737	0.959305192	1	0.695316272	841/7132/596	3	1
hsa01230	Biosynthesis of amino acids	9/737	0.963729419	1	0.695316272	586/5214/29920/875/84706/2875/5091/6888/3418	9	1
hsa00600	Sphingolipid metabolism	5/737	0.970197474	1	0.695316272	55512/130367/55304/7368/4758	5	1
hsa04140	Autophagy - animal	19/737	0.970204941	1	0.695316272	8837/5595/7249/5296/10645/5605/3480/57521/8878/3667/5293/596/3265/664/8408/2081/285973/440738/118471	19	1
hsa00563	Glycosylphosphatidylinositol (GPI)-anchor biosynthesis	2/737	0.971355499	1	0.695316272	9091/9488	2	1
hsa05332	Graft-versus-host disease	4/737	0.971762517	1	0.695316272	3552/3553/3106/7124	4	1
hsa00450	Selenocompound metabolism	1/737	0.972899135	1	0.695316272	22928	1	1
hsa00071	Fatty acid degradation	4/737	0.975663132	1	0.695316272	38/8310/1892/2180	4	1
hsa00511	Other glycan degradation	1/737	0.978087522	1	0.695316272	4758	1	1
hsa04714	Thermogenesis	33/737	0.980357629	1	0.695316272	5606/57492/6196/51412/51548/2260/2778/7249/51422/6390/1268/196883/51103/109/57521/63976/55811/2180/114/1339/90993/115/107/7386/111/3265/57104/2885/155/4697/4217/90639/125965	33	1
hsa00670	One carbon pool by folate	1/737	0.985675811	1	0.695316272	10840	1	1
hsa05012	Parkinson disease	35/737	0.986323636	1	0.695316272	5685/815/7419/2778/3710/147700/2771/6390/1843/3709/3831/7326/2774/6531/6622/1813/7345/9246/1339/9861/6571/3800/7386/163688/2861/111/2081/4137/4697/203068/4217/6263/10382/125965/79861	35	1
hsa03020	RNA polymerase	2/737	0.988474121	1	0.695316272	25885/51082	2	1
hsa04612	Antigen processing and presentation	8/737	0.988854427	1	0.695316272	3320/5641/925/6890/3305/3106/4261/7124	8	1
hsa04672	Intestinal immune network for IgA production	4/737	0.990285664	1	0.695316272	8174/3676/3695/8741	4	1
hsa04136	Autophagy - other	2/737	0.990418716	1	0.695316272	57521/285973	2	1
hsa04142	Lysosome	15/737	0.99119566	1	0.695316272	6556/5641/8120/10312/3425/23457/8372/9516/4758/9374/1519/968/10053/7805/1510	15	1
hsa00515	Mannose type O-glycan biosynthesis	1/737	0.992430931	1	0.695316272	27087	1	1
hsa03060	Protein export	1/737	0.992430931	1	0.695316272	83943	1	1
hsa03430	Mismatch repair	1/737	0.992430931	1	0.695316272	4437	1	1
hsa05016	Huntington disease	42/737	0.99537331	1	0.695316272	1387/5685/841/7419/23186/147700/1768/6390/2891/3831/7186/5330/774/5331/2893/2776/1339/90993/9861/3800/2915/7386/627/2902/8408/2081/387332/161/6667/8632/4697/203068/3064/4217/2904/10382/6804/55567/125965/2877/79861/146754	42	1
hsa03050	Proteasome	3/737	0.996027782	1	0.695316272	5685/9861/5696	3	1
hsa05322	Systemic lupus erythematosus	15/737	0.996309224	1	0.695316272	87/1991/2904/8970/3017/714/2215/713/712/8347/8349/128312/2214/7124/8357	15	1
hsa03018	RNA degradation	7/737	0.996364696	1	0.695316272	5214/54464/23019/219988/167227/10140/154197	7	1
hsa05330	Allograft rejection	2/737	0.996886313	1	0.695316272	3106/7124	2	1
hsa05310	Asthma	1/737	0.998620436	1	0.695316272	7124	1	1
hsa04622	RIG-I-like receptor signaling pathway	5/737	0.998710625	1	0.695316272	841/4792/7186/7187/7124	5	1
hsa04110	Cell cycle	12/737	0.998745588	1	0.695316272	8379/1387/896/10459/894/1031/1026/9088/8900/9184/4088/2810	12	1
hsa04120	Ubiquitin mediated proteolysis	14/737	0.998976929	1	0.695316272	23291/23295/868/7326/7428/23624/9246/26259/9021/7328/378884/11060/57154/134111	14	1
hsa03022	Basal transcription factors	2/737	0.999183126	1	0.695316272	2960/387332	2	1
hsa03015	mRNA surveillance pathway	8/737	0.999272055	1	0.695316272	5522/5527/10250/5519/124540/5521/29101/56903	8	1
hsa04141	Protein processing in endoplasmic reticulum	18/737	0.999273354	1	0.695316272	25956/56681/3320/80331/10483/7991/6747/57134/7186/7326/79748/8720/824/596/2081/4217/3305/85479	18	1
hsa05014	Amyotrophic lateral sclerosis	47/737	0.999523324	1	0.695316272	4843/5606/5685/7132/4842/3710/4744/4741/147700/2906/1768/6390/2891/5533/311/3831/7186/5879/834/1339/3084/9542/8878/2905/9861/3800/7386/596/2902/8408/2081/10718/8632/4697/203068/345456/4217/440738/2904/4747/10382/55567/125965/2877/79861/146754/7124	47	1
hsa05320	Autoimmune thyroid disease	2/737	0.999827606	1	0.695316272	3106/7173	2	1
