# Supplementary material for: A Wavelet-Based Learning Model Enhances Molecular Prognosis in Pancreatic Adenocarcinoma
Source: Biomed Res Int. 2021 Oct 16;2021:7865856. doi: 10.1155/2021/7865856 (PMC8541860; doi:10.1155/2021/7865856)
Supplement: Supplementary Materials — Additional file 1: the performance comparison of the proposed method. Additional file 2: the detailed results of KEGG pathway analyses. Additional file 3: the detailed results of GO analysis on the BP term. Additional file 4: the detailed results of GO analysis on the CC term. Additional file 5: the detailed results of GO analysis on the MF term. Additional file 6: the validation of the proposed method on the STAD dataset. [file 7865856.f1.zip › Additional file 3.txt]

ID	Description	GeneRatio	pvalue	p.adjust	qvalue	geneID	Count
GO:0043062	extracellular structure organization	145/812	1.34E-23	6.43E-21	4.43E-21	CFLAR/ITGAL/CD44/TLL1/LAMC3/COL23A1/LAMA3/COL11A1/TNFRSF1A/FSCN1/ITGA8/FAP/COL5A3/ITGAE/ADAMTS2/MMP2/NID2/LAMB1/ITGA6/COL9A3/TLL2/MADCAM1/MMP9/FERMT1/LAMA1/SMPD3/CRISPLD2/FOXF1/ICAM4/HAS1/COMP/AEBP1/KAZALD1/COL1A1/VWF/COL9A1/NR2E1/SMOC2/LAMA4/ITGA4/TNR/NID1/RECK/LRP1/MATN4/SOX9/TCF15/KDR/NCAN/PXDN/COL5A1/ITGB4/BCAN/MYH11/PDGFRA/COL4A2/FOXF2/ITGA11/ADAM10/CYP1B1/ADAMTS14/FBN2/COL2A1/ITGB7/FBLN5/CO…	145
GO:0030198	extracellular matrix organization	145/812	9.78E-24	5.55E-21	3.82E-21	CFLAR/ITGAL/CD44/TLL1/LAMC3/COL23A1/LAMA3/COL11A1/TNFRSF1A/FSCN1/ITGA8/FAP/COL5A3/ITGAE/ADAMTS2/MMP2/NID2/LAMB1/ITGA6/COL9A3/TLL2/MADCAM1/MMP9/FERMT1/LAMA1/SMPD3/CRISPLD2/FOXF1/ICAM4/HAS1/COMP/AEBP1/KAZALD1/COL1A1/VWF/COL9A1/NR2E1/SMOC2/LAMA4/ITGA4/TNR/NID1/RECK/LRP1/MATN4/SOX9/TCF15/KDR/NCAN/PXDN/COL5A1/ITGB4/BCAN/MYH11/PDGFRA/COL4A2/FOXF2/ITGA11/ADAM10/CYP1B1/ADAMTS14/FBN2/COL2A1/ITGB7/FBLN5/CO…	145
GO:0048871	multicellular organismal homeostasis	142/812	7.57E-11	4.73E-09	3.26E-09	CYP26B1/CD38/TFAP2B/MLXIPL/IL20RA/SLC11A1/WWTR1/PTGER3/CROCC/CLDN18/TP63/SIRT6/AKR1B1/NOX4/GNAS/SCD/NTSR1/CORO1A/ZNF423/CSK/HOMER2/PPP1R13L/NOVA2/MET/GRB10/PHOX2B/TCIRG1/PRR4/SCNN1A/GCNT2/TULP1/LAMA4/NPR3/EIF4G1/IL1A/PASK/LEPR/CNR1/G0S2/SOX9/IL1B/ADCY4/SLC27A1/KDM6B/AMPD3/EDNRB/RAC1/IRF4/ADCY3/SLC40A1/COL2A1/TLE3/IGF1R/ADCYAP1/TNFRSF11A/PRDM16/ILDR2/PTH2R/MUC4/PLAC8/PDGFC/EGFR/PRDM14/LCN2/NOTCH1/…	142
GO:0001667	ameboidal-type cell migration	131/812	3.35E-09	1.41E-07	9.72E-08	PLXND1/SOX8/TAC1/TBXA2R/ISL1/MAP2K3/FLT4/BCAR1/FGF10/MAP4K4/SEMA3C/FGF4/FGFR1/FAP/PXN/ANGPT2/CARD10/LGMN/MMP9/ANGPT4/FERMT1/ARHGEF7/HAS1/MET/MEOX2/GATA3/FGF8/HDAC5/PHOX2B/CORO1C/NR2E1/CCR6/SMOC2/FGF1/FOXP1/ITGA4/NRP2/TWIST1/GIPC1/EFNB2/BMP4/SOX9/MACF1/KDR/STARD13/ACVR1B/EDNRB/CYP1B1/ITGB7/DNAJA4/CDH13/EPHA2/IQSEC1/PTPRG/SLIT2/GNA12/DOCK5/CRB2/NOTCH1/PAK1/ITGB1/VEGFC/PTPRR/ANGPT1/PRKCA/MIA3/ITGB2/…	131
GO:0045785	positive regulation of cell adhesion	114/812	3.99E-08	1.16E-06	8.01E-07	RUNX3/CD44/PTPRU/CBFB/MAP4K4/GLI2/ITGA6/FERMT1/SMAD7/ARHGEF7/CORO1A/FOXF1/CSK/SFRP1/AGR2/GLI3/DOCK8/GATA3/ZMIZ1/ZBTB16/CD5/IL23A/GCNT2/SMOC2/ITGA4/IGFBP2/IL1RL2/NID1/EFNB2/IL1B/CCR7/KDR/PODXL/EPO/VAV3/VTCN1/HAVCR2/DYSF/RAC1/ZFHX3/CDH13/SFRP2/MYO10/DOCK5/PAK1/IL18/ANK3/ADAM8/THY1/ANGPT1/PRKCA/WNT3A/FLCN/CD1D/RUNX1/ITGB2/PDPN/VCAM1/KIF26B/FBLN2/EDIL3/EGFLAM/SHH/RET/SMAD3/CCDC88B/NPNT/PTAFR/PRKCE/AZ…	114
GO:1903532	positive regulation of secretion by cell	111/812	2.68E-07	6.15E-06	4.24E-06	FGR/CD38/TAC1/CACNA1G/BAIAP3/NADK/SYT7/ISL1/SYT1/GAL/FGFR1/AACS/OPRK1/DNM1L/STX1B/CACNA1I/NTSR1/FERMT1/MAPK3/SMPD3/GCK/GATA3/PANX1/EXPH5/SYT10/IL1A/SPTBN1/SDC1/CD58/CNR1/TWIST1/LRP1/IL1B/UNC13A/TRPM4/ANO1/VPS4A/PTPN22/VTCN1/GRP/HAVCR2/DHX9/RAC1/CASP1/ADCYAP1/TNFRSF11A/SNCA/TSLP/EGFR/CRH/TCF7L2/DRD2/VEGFC/FRMD4A/ADAM8/BMP6/ADCY8/KCNB1/ITGB2/NKX6-1/UCN/CARTPT/CACNB2/RAB8B/AVPR1A/GALR1/GDNF/PTAFR/IT…	111
GO:1990778	protein localization to cell periphery	95/812	3.76E-08	1.12E-06	7.70E-07	ANK1/EPHA3/PKP2/TNFRSF1A/ACTN2/EPB41L3/TESC/SORBS1/STX1B/PALM/CSK/ANXA13/CLIP3/CACNG7/AGR2/LIN7A/SPTBN1/GHSR/RAMP3/LRP1/MACF1/DPP6/ARHGEF16/VPS4A/SNAP25/MAP7/KIF13A/ADAM10/STAC2/CACNG8/EPHA2/STAC/ANK2/EGFR/ITGB1/DLG2/ANK3/TNIK/WNT3A/GRIP1/KCNB1/F11R/SPTBN4/SQSTM1/GRIN2C/GRASP/CNST/PKDCC/NFASC/TTC7B/CACNB2/RAB8B/TSPAN5/VAMP5/CPLX1/CDH2/PRKCE/CLSTN1/MAL/BSG/HRAS/DPP10/GRIN1/ZDHHC22/GAK/MYADM/ANXA2/…	95
GO:0015850	organic hydroxy compound transport	76/812	2.52E-06	4.61E-05	3.17E-05	ABCB4/TAC1/SYT7/ABCC2/SYT1/GAL/OSBPL3/OPRK1/NCOA1/NOS1/SLC16A8/CHGA/NFKBIA/HRH3/CHRNA4/LIPG/SLC6A2/P2RX1/SYT10/POMC/SCP2/CNR1/SLC16A7/GHSR/LRP1/SYT5/LDLR/APOC1/VPS4A/SYT6/STRA6/EGF/OSBPL1A/SLC16A3/SLC6A3/SLC10A4/SNCA/SLC22A3/STAR/CRH/DRD2/BMP6/SLC16A1/KCNB1/UCN/CARTPT/SHH/SLC18A2/LIPC/GALR1/GDNF/CEL/LEP/HTR1A/MAPK15/ANXA2/NPY2R/PTCH1/RXRA/SYT3/SLC5A8/ITGB3/NPC1L1/SYT13/PLA2G10/CEACAM1/LILRB1/STX1…	76
GO:0035637	multicellular organismal signaling	74/812	9.39E-11	5.58E-09	3.85E-09	CACNA1G/CACNA2D2/KCNQ1/KCNH2/PKP2/DMRT3/NOS1/FXYD3/SLC9A1/NRCAM/ITPR3/CACNA1I/MYH14/CACNG7/P2RX1/KCNA1/PDE4D/FGF12/TNR/TNNI3K/SLC8A2/GHSR/ITPR2/ATP1B2/KCNA5/CACNG6/TRPM4/MTNR1B/NTRK3/CACNG8/CORIN/ANK2/GLRA1/FXYD4/CACNA2D4/CACNA1C/ANK3/CACNA2D3/SPTBN4/NPPC/ATP1A1/NFASC/CLDN19/CARTPT/GRIK2/CACNB2/AVPR1A/STIM1/DRD5/KCNK3/CNTNAP2/KCNE1/GPR88/SLC8A1/NKX2-5/KCNJ12/KCNIP4/RYR1/CACNA1H/SCN8A/RYR2/RYR3/MI…	74
GO:0007160	cell-matrix adhesion	71/812	1.69E-07	4.13E-06	2.84E-06	ITGAL/CD44/EPHA3/LIMCH1/MAP4K4/ACTN1/ACTN2/ITGA8/COL5A3/NID2/SLC9A1/ITGA6/SORBS1/MADCAM1/FERMT1/ARHGEF7/MSLN/SFRP1/CORO1C/ITGA4/NID1/HOXA7/LRP1/CCR7/MACF1/SGCE/KDR/HOXD3/ITGB4/RAC1/ITGA11/ITGB7/FBLN5/CDH13/MUC4/RASA1/ITGB1/ADAMTS12/THY1/TIAM1/ZYX/LYPD5/ITGB2/VCAM1/FREM1/VWA2/SMAD3/FAM107A/NPNT/ONECUT1/BCL2/CD34/EFNA5/CIB1/AJAP1/NF1/SRC/S100A10/ITGBL1/EMP2/ACTN3/ITGB3/ITGA3/COL17A1/CEACAM6/ONECUT2…	71
GO:0044706	multi-multicellular organism process	61/812	0.000131929	0.001365675	0.000941019	CD38/TAC1/ABCC2/PRDM1/EPN1/PGR/AKR1B1/MMP2/ESR1/ANGPT2/MMP9/MAPK3/P2RX1/STC2/IGFBP2/SLC2A1/CNR1/PRLHR/GHSR/PTGFR/RECK/TEKT3/IL1B/FOSB/EPO/HAVCR2/ACVR1B/ADCYAP1/CORIN/CRHBP/CRH/PRDM14/CAPN2/UCN/HPGD/GJB2/AVPR1A/PNOC/PTAFR/FOS/BCL2/BSG/STOX2/LEP/SH3PXD2B/PLA2G6/HSF1/RXRA/HYAL3/HMX3/BMPR2/EMP2/ITGA3/PTGS2/KLF1/LIF/IHH/TCF23/FOSL1/CLDN4/PSG5	61
GO:1903531	negative regulation of secretion by cell	59/812	0.000115328	0.0012222	0.000842158	TNFRSF1A/MAP4K4/SREBF1/OPRK1/RAB11FIP3/CHGA/HRH3/FOXF1/SFRP1/OPRM1/GNAI2/IL1R2/CNR1/GHSR/IL1B/PTPN22/MTNR1B/SNCA/CRHBP/CRH/NOTCH1/DRD2/FRMD4A/ANGPT1/KCNB1/ABR/UCN/NPY5R/CARTPT/MIDN/IRS1/TRH/CD34/TLR6/LEP/CIDEA/SSC5D/IDH2/GRM7/NF1/NMB/TRIM27/SRCIN1/CD22/CD84/FCGR2B/CEACAM1/HMOX1/TLR8/LILRB1/CCR2/LIF/APOE/NLRP12/F2RL1/CD300A/P2RY12/FAM3D/TNF	59
GO:0007586	digestion	52/812	1.69E-08	5.70E-07	3.93E-07	TAC1/PTGER3/KCNQ1/FGF10/OPRK1/PGC/NPR3/HRH2/SGK1/TJP2/GHSR/SOX9/WNK4/LDLR/CAPN9/MUC4/CRH/SST/F11R/NEUROD1/UCN/MOGAT2/CTRB1/CTRB2/CEL/LEP/SLC9A4/NEUROG1/MUC6/CCK/STK39/CAPN8/PNLIPRP2/PRSS3/NPC1L1/SNX10/VSIG1/KCNN4/NMU/PLS1/CHIT1/CD36/GCNT3/ABCG8/TFF3/TFF2/TFF1/AQP5/ALPI/MUC13/TIFAB/PGA5	52
GO:0055123	digestive system development	65/812	2.54E-14	3.60E-12	2.48E-12	ALX4/PRDM1/CLDN18/FGFR2/FGF10/TP63/GLI2/ITGA6/PTK6/KLF5/FGF9/FOXF1/SALL1/SFRP1/HOXA5/COBL/RARRES2/AGR2/GLI3/NKX3-2/HRH2/TCF21/NKX2-3/TBX2/NPY/CDKN1A/BMP4/NKX2-2/HOXD13/ALDH1A2/GATA5/PYY/BARX1/ITGB4/PDGFRA/EDNRB/FOXF2/STRA6/ASCL1/CCDC40/SFRP2/PDGFC/EGFR/NOTCH1/PKDCC/SHH/SOX17/RET/RBPMS2/SMAD3/PTF1A/SHOX2/BCL2/DAB1/SOX11/FOXE1/NKX2-6/FAT4/SPDEF/OVOL2/PDX1/IHH/FOXL1/EPHB3/TNF	65
GO:1902414	protein localization to cell junction	32/812	7.96E-05	0.000890735	0.000613762	STX1B/CACNG7/DVL1/NRXN2/KIF17/GHSR/TERF2/SNAP25/ADAM10/MAPK8IP3/CACNG8/MPP7/DLG2/GRIP1/GRIN2C/SHANK1/GRASP/NETO1/KIF5C/CPLX1/CLSTN1/HRAS/CNIH2/BAIAP2/GRIN1/NRXN1/GPC6/ANKS1B/MAPT/SHISA6/CACNG3/MARVELD3	32
GO:0022617	extracellular matrix disassembly	28/812	0.000161311	0.001593202	0.001097797	CD44/TLL1/FSCN1/FAP/MMP2/TLL2/MMP9/LRP1/ADAM10/ADAM8/ADAMTS5/MMP16/PDPN/CAPN2/HTRA1/KLK4/CTRB1/CTRB2/BSG/SH3PXD2B/TMPRSS6/ELANE/LCP1/MMP3/KLK7/TPSAB1/MMP1/MMP12	28
GO:0030199	collagen fibril organization	22/812	4.94E-05	0.000604511	0.000416538	COL11A1/COL5A3/ADAMTS2/COMP/AEBP1/COL1A1/PXDN/COL5A1/CYP1B1/ADAMTS14/COL2A1/SFRP2/PLOD2/ADAMTS3/ACAN/GREM1/TNXB/FOXC2/ANXA2/COL14A1/NF1/COL11A2	22
GO:0044058	regulation of digestive system process	18/812	4.95E-05	0.000604511	0.000416538	TAC1/PTGER3/KCNQ1/FGF10/OPRK1/SGK1/GHSR/WNK4/CRH/NEUROD1/UCN/LEP/NEUROG1/STK39/NMU/ABCG8/TFF2/TIFAB	18
GO:0007409	axonogenesis	195/812	1.70E-35	1.06E-31	7.30E-32	PLXND1/PAX6/CELSR3/LYPLA2/ISL1/NRXN3/TRIO/EPHA3/FSTL4/CYFIP2/GPC1/CTNNA2/FGFR2/SPTB/EPHA8/CRMP1/GLI2/SEMA3C/PAX2/PLXNA2/MAP2/EPHA6/HSP90AA1/MT3/POU4F3/NRCAM/DPYSL2/EFNA2/NEFH/LAMA1/MAPK3/PTPRS/DLX5/HOXA2/GRB10/COBL/GLI3/LHX2/LHX3/DVL1/GATA3/FGF8/PHOX2B/GAB1/UST/NR2E1/UNC5A/PLXNA1/ITGA4/SPTBN1/EPHA4/TNR/NRP2/LHX4/SLITRK3/EGR2/LRP1/EFNB2/GFRA4/BCL11B/MACF1/FEZF1/PALLD/MAP1B/LLGL1/ZSWIM4/ATP8A2/DCLK…	195
GO:0003002	regionalization	157/812	5.25E-33	1.51E-29	1.04E-29	CYP26B1/PAX6/PAX7/ISL1/ALX4/DMRT3/FGFR2/FGF10/TP63/GLI2/SEMA3C/CELSR1/PAX2/PLXNA2/FGFR1/HOXA9/KDM2B/DLL3/FOXF1/SFRP1/HOXA2/HOXA3/LFNG/HOXA5/HOXA6/EVX1/COBL/MEOX2/GLI3/LHX2/LHX3/FGF8/SUFU/DBX1/ZBTB16/MYF6/RFX4/MDFI/TBX18/FGF1/CDX1/NRP2/HOXB8/HOXB3/HOXB1/HOXA7/EGR2/HOXC13/SNAI1/BMP4/PAX8/PAX1/NKX2-2/TCF15/FEZF1/HOXD3/HOXD9/HOXD10/HOXD11/HOXD13/ALDH1A2/GATA5/BARX1/BHLHE40/TBX3/EMX1/PCDH8/NKX2-1/TBR1…	157
GO:0007389	pattern specification process	184/812	7.27E-33	1.51E-29	1.04E-29	CYP26B1/PAX6/PAX7/ISL1/ALX4/DMRT3/FGFR2/FGF10/TP63/GLI2/SEMA3C/CELSR1/PAX2/PLXNA2/FGFR1/HOXA9/KDM2B/TBX5/DLL3/NDRG4/FOXF1/SFRP1/HOXA2/HOXA3/LFNG/HOXA5/HOXA6/EVX1/COBL/MEOX2/GLI3/LHX2/LHX3/FGF8/SUFU/NKX3-2/DBX1/ZBTB16/MYF6/RFX4/MDFI/TBX18/HAND1/IRX4/FGF1/CDX1/APC2/WNT6/NRP2/HOXB8/HOXB3/HOXB1/TBX2/HOXA7/EGR2/HOXC13/SNAI1/BMP4/PAX8/PAX1/NKX2-2/TCF15/FEZF1/HOXD3/HOXD9/HOXD10/HOXD11/HOXD13/ALDH1A2/GAT…	184
GO:0097485	neuron projection guidance	131/812	1.11E-30	1.73E-27	1.19E-27	PLXND1/PAX6/CELSR3/LYPLA2/ISL1/NRXN3/TRIO/EPHA3/CYFIP2/GPC1/SPTB/EPHA8/CRMP1/GLI2/SEMA3C/PLXNA2/EPHA6/POU4F3/NRCAM/DPYSL2/EFNA2/LAMA1/MAPK3/DLX5/HOXA2/GRB10/GLI3/LHX2/LHX3/DVL1/GATA3/FGF8/GAB1/UNC5A/PLXNA1/SPTBN1/EPHA4/TNR/NRP2/LHX4/EGR2/LRP1/EFNB2/GFRA4/BCL11B/FEZF1/PALLD/ZSWIM4/CHL1/PLXNC1/RAC1/NKX2-1/TBR1/SPTBN5/EPHA2/GDF7/CNTN4/LRTM1/SLIT2/EPHA5/DOK2/VAX1/NCAM1/FEZ1/POU4F2/DPYSL4/GFRA1/FEZF2/…	131
GO:0007411	axon guidance	130/812	3.08E-30	3.84E-27	2.65E-27	PLXND1/PAX6/CELSR3/LYPLA2/ISL1/NRXN3/TRIO/EPHA3/CYFIP2/GPC1/SPTB/EPHA8/CRMP1/GLI2/SEMA3C/PLXNA2/EPHA6/POU4F3/NRCAM/DPYSL2/EFNA2/LAMA1/MAPK3/DLX5/HOXA2/GRB10/GLI3/LHX2/LHX3/DVL1/GATA3/FGF8/GAB1/UNC5A/PLXNA1/SPTBN1/EPHA4/TNR/NRP2/LHX4/EGR2/LRP1/EFNB2/GFRA4/BCL11B/FEZF1/PALLD/ZSWIM4/CHL1/PLXNC1/RAC1/NKX2-1/TBR1/SPTBN5/EPHA2/GDF7/CNTN4/LRTM1/SLIT2/EPHA5/DOK2/VAX1/NCAM1/FEZ1/POU4F2/GFRA1/FEZF2/ROBO3/P…	130
GO:0048568	embryonic organ development	170/812	4.04E-28	4.21E-25	2.90E-25	WNT16/PAX6/ALX4/PRDM1/COL11A1/EPN1/CASP8/FGFR2/FGF10/GLI2/CELSR1/PAX2/FGFR1/ITGA8/NCOA1/GNAS/KDM2B/POU4F3/TBX15/MYO3A/FGF9/MAPK3/NDRG4/FOXF1/SALL1/STK3/PPP1R13L/DLX5/HOXA1/HOXA2/HOXA3/HOXA5/HOXA6/COBL/RARRES2/GLI3/DVL1/GATA3/FGF8/SUFU/NKX3-2/SOBP/MDFI/HAND1/EFEMP1/PRRX1/KCNQ4/TCF21/HOXB8/HOXB3/HOXB1/TBX2/HOXA7/TWIST1/SNAI1/RUNX2/BMP4/SOX9/PAX8/KDR/HOXD3/HOXD9/HOXD10/ALDH1A2/ATP8A2/MICAL2/PDGFRA/T…	170
GO:0048562	embryonic organ morphogenesis	130/812	5.49E-28	4.89E-25	3.37E-25	WNT16/PAX6/ALX4/COL11A1/FGFR2/FGF10/GLI2/CELSR1/PAX2/FGFR1/ITGA8/GNAS/KDM2B/POU4F3/TBX15/MYO3A/FGF9/MAPK3/NDRG4/FOXF1/SALL1/DLX5/HOXA1/HOXA2/HOXA3/HOXA5/HOXA6/GLI3/DVL1/GATA3/FGF8/SUFU/NKX3-2/SOBP/MDFI/HAND1/EFEMP1/PRRX1/KCNQ4/TCF21/HOXB8/HOXB3/HOXB1/TBX2/HOXA7/TWIST1/RUNX2/BMP4/SOX9/PAX8/HOXD3/HOXD9/HOXD10/ATP8A2/MICAL2/PDGFRA/TBX3/SPRY2/TFAP2A/FOXF2/MYO7A/STRA6/SIX3/LBX1/FBN2/COL2A1/CCDC40/EPHA…	130
GO:0045165	cell fate commitment	122/812	3.29E-26	2.57E-23	1.77E-23	WNT16/CYP26B1/SOX8/PAX6/PAX7/ISL1/PRDM1/DMRT3/FGFR2/PITX1/RORA/FGF10/TCF3/TBX21/GLI2/PAX2/FGFR1/TBX5/TBX15/SFRP1/ETV2/HOXA2/EVX1/GLI3/LHX3/GATA3/FGF8/SUFU/DBX1/SOX6/IL23A/MYF6/NR2E1/TBX18/APC2/WNT6/PRRX1/ARHGEF2/TBX2/TBX4/NEUROD4/RUNX2/BMP4/SOX9/NKX2-2/BCL11B/HOXD10/MYOD1/KDM6B/TBX3/ELF5/SPRY2/NKX2-1/TBR1/IRF4/LBX1/ASCL1/DHH/NTRK3/DMRTA2/LMO4/BARHL2/GDF7/DLX1/SFRP2/PRDM14/NOTCH1/TCF7L2/TBX6/ITGB1…	122
GO:0048736	appendage development	90/812	7.70E-24	4.80E-21	3.31E-21	CYP26B1/CREBBP/TFAP2B/ALX4/FGFR2/PITX1/FGF10/TP63/GLI2/SEMA3C/FGF4/PLXNA2/FGFR1/HOXA9/GNAS/TBX5/ITGA6/RSPO4/FGF9/SALL1/IMPAD1/COMP/DLX5/IQCE/MEOX2/GLI3/FGF8/ZBTB16/PRRX1/ECE1/TBX2/TBX4/TWIST1/RECK/HOXC13/RUNX2/BMP4/SOX9/HOXD9/HOXD10/HOXD13/ALDH1A2/KREMEN2/ITGB4/RAX/TBX3/TFAP2A/FRAS1/FBN2/COL2A1/OSR1/AFF3/SFRP2/GNA12/RSPO2/NOTCH1/CACNA1C/ALX3/SKI/PKDCC/EN1/MSX1/PITX2/HAND2/SP8/SHH/OSR2/GREM1/SHOX2…	90
GO:0060173	limb development	90/812	7.70E-24	4.80E-21	3.31E-21	CYP26B1/CREBBP/TFAP2B/ALX4/FGFR2/PITX1/FGF10/TP63/GLI2/SEMA3C/FGF4/PLXNA2/FGFR1/HOXA9/GNAS/TBX5/ITGA6/RSPO4/FGF9/SALL1/IMPAD1/COMP/DLX5/IQCE/MEOX2/GLI3/FGF8/ZBTB16/PRRX1/ECE1/TBX2/TBX4/TWIST1/RECK/HOXC13/RUNX2/BMP4/SOX9/HOXD9/HOXD10/HOXD13/ALDH1A2/KREMEN2/ITGB4/RAX/TBX3/TFAP2A/FRAS1/FBN2/COL2A1/OSR1/AFF3/SFRP2/GNA12/RSPO2/NOTCH1/CACNA1C/ALX3/SKI/PKDCC/EN1/MSX1/PITX2/HAND2/SP8/SHH/OSR2/GREM1/SHOX2…	90
GO:0050804	modulation of chemical synaptic transmission	163/812	1.20E-23	6.24E-21	4.30E-21	CD38/TAC1/CACNA2D2/BAIAP3/RNF216/SYT7/APBA2/RASGRF1/SYT1/CAMK2A/SCGN/RIMS1/CHRNA3/IGSF9B/MTMR2/DNM1L/JPH4/ITPR3/STX1B/LGMN/RIMS4/NTSR1/CHRNA4/FGF14/CBLN1/CALB1/NAPA/PTPRS/GRIN2D/CACNG7/CRHR2/NPTX2/DVL1/CPEB3/P2RX1/CUX2/NR2E1/GRM6/HRH2/GNAI2/EPHA4/TNR/RGS4/SLC8A2/CNR1/PCDH17/ADRA1A/TSHZ3/GHSR/EGR2/GIPC1/GRM4/IL1B/PRKCG/UNC13A/MAP1B/SNAP25/NGF/ITPKA/ADCYAP1/CACNA1A/SH3GL1/CACNG8/CNTN4/TMEM108/SNCA/…	163
GO:0099177	regulation of trans-synaptic signaling	163/812	1.59E-23	7.09E-21	4.88E-21	CD38/TAC1/CACNA2D2/BAIAP3/RNF216/SYT7/APBA2/RASGRF1/SYT1/CAMK2A/SCGN/RIMS1/CHRNA3/IGSF9B/MTMR2/DNM1L/JPH4/ITPR3/STX1B/LGMN/RIMS4/NTSR1/CHRNA4/FGF14/CBLN1/CALB1/NAPA/PTPRS/GRIN2D/CACNG7/CRHR2/NPTX2/DVL1/CPEB3/P2RX1/CUX2/NR2E1/GRM6/HRH2/GNAI2/EPHA4/TNR/RGS4/SLC8A2/CNR1/PCDH17/ADRA1A/TSHZ3/GHSR/EGR2/GIPC1/GRM4/IL1B/PRKCG/UNC13A/MAP1B/SNAP25/NGF/ITPKA/ADCYAP1/CACNA1A/SH3GL1/CACNG8/CNTN4/TMEM108/SNCA/…	163
GO:0048705	skeletal system morphogenesis	107/812	6.57E-23	2.73E-20	1.88E-20	FGR/CYP26B1/ALX4/FOXN3/COL11A1/FGFR2/FGF4/FGFR1/MMP2/GNAS/TBX15/TRIP11/SMPD3/IMPAD1/SFRP1/COMP/DLX5/HOXA1/HOXA2/HOXA3/HOXA5/HOXA6/GLI3/COL1A1/NKX3-2/MDFI/CDX1/PRRX1/MEF2D/HOXB8/HOXB3/HOXB1/TBX4/HOXA7/TWIST1/MATN4/RUNX2/BMP4/SOX9/PAX1/TCF15/HOXD3/HOXD9/HOXD10/PDGFRA/TFAP2A/FBN2/COL2A1/COL6A2/OSR1/SFRP2/CSGALNACT1/BMP6/MMP16/ALX3/ACAN/SKI/LRP5/DHRS3/ALPL/MSX1/NPPC/RYK/UNCX/OSR2/FREM1/VWA2/GREM1/SMA…	107
GO:0035107	appendage morphogenesis	77/812	8.97E-22	3.30E-19	2.27E-19	CYP26B1/CREBBP/TFAP2B/ALX4/FGFR2/PITX1/FGF10/TP63/GLI2/SEMA3C/FGF4/PLXNA2/FGFR1/HOXA9/GNAS/TBX5/FGF9/SALL1/IMPAD1/DLX5/IQCE/GLI3/FGF8/ZBTB16/PRRX1/ECE1/TBX2/TBX4/TWIST1/RECK/RUNX2/BMP4/SOX9/HOXD9/HOXD10/HOXD13/ALDH1A2/TBX3/TFAP2A/FRAS1/FBN2/COL2A1/OSR1/AFF3/SFRP2/GNA12/RSPO2/NOTCH1/CACNA1C/ALX3/SKI/PKDCC/EN1/MSX1/HAND2/SP8/SHH/OSR2/SHOX2/HOXD12/CHST11/EVX2/SOX11/ALX1/HOXC10/PBX1/PTCH1/TRAF3IP1/SP…	77
GO:0035108	limb morphogenesis	77/812	8.97E-22	3.30E-19	2.27E-19	CYP26B1/CREBBP/TFAP2B/ALX4/FGFR2/PITX1/FGF10/TP63/GLI2/SEMA3C/FGF4/PLXNA2/FGFR1/HOXA9/GNAS/TBX5/FGF9/SALL1/IMPAD1/DLX5/IQCE/GLI3/FGF8/ZBTB16/PRRX1/ECE1/TBX2/TBX4/TWIST1/RECK/RUNX2/BMP4/SOX9/HOXD9/HOXD10/HOXD13/ALDH1A2/TBX3/TFAP2A/FRAS1/FBN2/COL2A1/OSR1/AFF3/SFRP2/GNA12/RSPO2/NOTCH1/CACNA1C/ALX3/SKI/PKDCC/EN1/MSX1/HAND2/SP8/SHH/OSR2/SHOX2/HOXD12/CHST11/EVX2/SOX11/ALX1/HOXC10/PBX1/PTCH1/TRAF3IP1/SP…	77
GO:0009952	anterior/posterior pattern specification	99/812	1.12E-21	3.90E-19	2.69E-19	PAX6/ALX4/GLI2/SEMA3C/CELSR1/PLXNA2/HOXA9/KDM2B/DLL3/FOXF1/SFRP1/HOXA2/HOXA3/LFNG/HOXA5/HOXA6/COBL/MEOX2/GLI3/FGF8/ZBTB16/MYF6/TBX18/CDX1/HOXB8/HOXB3/HOXB1/HOXA7/HOXC13/BMP4/PAX1/TCF15/FEZF1/HOXD3/HOXD9/HOXD10/HOXD13/ALDH1A2/BARX1/BHLHE40/TBX3/PCDH8/SIX3/PCSK6/OSR1/SFRP2/CRB2/NOTCH1/TBX6/FEZF2/WNT3A/ETS2/SKI/LRP5/NEUROD1/EN1/MSX1/HEYL/SHH/SOX17/OTX2/SMAD3/GBX2/AXIN2/ZEB2/HOXD4/EMX2/HOXB9/FOXB1/DM…	99
GO:0021953	central nervous system neuron differentiation	87/812	5.33E-21	1.75E-18	1.21E-18	PAX6/PAX7/ISL1/DMRT3/FGFR2/RORA/GLI2/MAP2/HSP90AA1/LHX5/CBLN1/SALL1/SFRP1/DLX5/EVX1/GLI3/LHX6/LHX3/FGF8/SUFU/PHOX2B/DBX1/MDGA1/NR2E1/EPHA4/NRP2/LHX4/NPY/NKX2-2/BCL11B/HOXD10/DCLK1/FAIM2/EMX1/NKX2-1/TBR1/LBX1/ASCL1/MDGA2/LMO4/GDF7/DLX1/SLIT2/SFRP2/DRD2/POU4F1/SPOCK1/FEZF2/WNT3A/EPHB1/UNC5D/B4GALT5/ISL2/SPTBN4/TAL1/LHX8/LMX1A/EOMES/NKX6-1/RYK/TBX20/SHH/UNCX/PHOX2A/GBX2/ZEB2/GSX1/ROBO1/DCLK2/OTP/KND…	87
GO:0001708	cell fate specification	59/812	6.58E-21	2.05E-18	1.42E-18	PAX6/ISL1/DMRT3/TBX21/GLI2/PAX2/FGFR1/TBX5/TBX15/ETV2/EVX1/GLI3/LHX3/SUFU/DBX1/SOX6/TBX18/APC2/TBX2/TBX4/SOX9/NKX2-2/HOXD10/TBX3/TBR1/LBX1/ASCL1/DHH/NTRK3/DMRTA2/LMO4/SFRP2/PRDM14/NOTCH1/TBX6/ITGB1/POU4F1/WNT3A/ISL2/EOMES/NKX6-1/TLX3/TBX20/SHH/SOX17/OLIG3/HOXC10/SOX1/TBX1/PTCH1/MYT1L/DLL1/SOX18/OLIG2/HOXA11/ESRP1/FOXA2/FOXA1/IHH	59
GO:0048706	embryonic skeletal system development	66/812	4.56E-19	1.36E-16	9.34E-17	PAX7/ALX4/COL11A1/FGFR2/HOXA9/GNAS/TBX15/FGF9/XYLT1/HOXA1/HOXA2/HOXA3/HOXA5/HOXA6/GLI3/COL1A1/NKX3-2/MDFI/PRRX1/HOXB8/HOXB3/HOXB1/KIAA1217/HOXA7/TWIST1/RUNX2/BMP4/HOXD1/HOXD3/HOXD9/HOXD10/PDGFRA/TFAP2A/COL2A1/OSR1/DLX1/MMP16/ALX3/SHH/OSR2/SMAD3/SHOX2/HOXD4/HOXB9/CHST11/DMRT2/FOXC2/IRX5/SOX11/DSCAML1/ALX1/HOXC9/EXT1/HOXB4/TBX1/PBX1/PAX5/HOXA4/HOXC4/LHX1/HOXA11/GRHL2/SIX4/HOXC11/IHH/HOXC6	66
GO:0030326	embryonic limb morphogenesis	65/812	1.39E-18	3.77E-16	2.60E-16	CYP26B1/CREBBP/ALX4/PITX1/TP63/GLI2/FGF4/FGFR1/HOXA9/GNAS/TBX5/FGF9/SALL1/IMPAD1/DLX5/GLI3/FGF8/ZBTB16/PRRX1/ECE1/TBX2/TBX4/TWIST1/RECK/RUNX2/BMP4/HOXD9/HOXD10/HOXD13/ALDH1A2/TBX3/TFAP2A/FRAS1/FBN2/OSR1/AFF3/SFRP2/GNA12/RSPO2/NOTCH1/CACNA1C/ALX3/SKI/EN1/MSX1/HAND2/SP8/SHH/OSR2/SHOX2/HOXD12/CHST11/ALX1/HOXC10/PBX1/PTCH1/TRAF3IP1/SP9/HOXA10/HOXA11/GRHL2/MSX2/HOXC11/CRABP2/IHH	65
GO:0035113	embryonic appendage morphogenesis	65/812	1.39E-18	3.77E-16	2.60E-16	CYP26B1/CREBBP/ALX4/PITX1/TP63/GLI2/FGF4/FGFR1/HOXA9/GNAS/TBX5/FGF9/SALL1/IMPAD1/DLX5/GLI3/FGF8/ZBTB16/PRRX1/ECE1/TBX2/TBX4/TWIST1/RECK/RUNX2/BMP4/HOXD9/HOXD10/HOXD13/ALDH1A2/TBX3/TFAP2A/FRAS1/FBN2/OSR1/AFF3/SFRP2/GNA12/RSPO2/NOTCH1/CACNA1C/ALX3/SKI/EN1/MSX1/HAND2/SP8/SHH/OSR2/SHOX2/HOXD12/CHST11/ALX1/HOXC10/PBX1/PTCH1/TRAF3IP1/SP9/HOXA10/HOXA11/GRHL2/MSX2/HOXC11/CRABP2/IHH	65
GO:0048663	neuron fate commitment	43/812	4.46E-18	1.16E-15	7.99E-16	PAX6/PAX7/ISL1/DMRT3/GLI2/EVX1/GLI3/LHX3/SUFU/DBX1/PRRX1/BMP4/NKX2-2/BCL11B/HOXD10/NKX2-1/TBR1/LBX1/ASCL1/NTRK3/DMRTA2/DLX1/NOTCH1/POU4F1/FEZF2/NRG1/ISL2/NKX6-1/TLX3/SHH/PTF1A/GSX1/OLIG3/HOXC10/SOX1/OLIG1/MYT1L/DLL1/ZNF521/OLIG2/ESRP1/FOXA1/IHH	43
GO:0001655	urogenital system development	122/812	1.46E-17	3.61E-15	2.49E-15	CYP26B1/CFLAR/SOX8/TFAP2B/WWTR1/FGFR2/FGF10/TP63/GLI2/ACAT1/PAX2/FGFR1/ITGA8/TP73/AKR1B1/ITGA6/ESR1/ANGPT2/CYP26A1/MMP9/SMAD7/FOXF1/SALL1/CALB1/SFRP1/AMH/GLI3/GATA3/FGF8/ZBTB16/SIM1/TBX18/FGF1/WNT6/SDC1/EPHA4/NID1/TCF21/EFNB2/BMP4/SOX9/PAX8/WNK4/MPST/PODXL/HOXD11/HOXD13/ALDH1A2/ITGB4/PDGFRA/TFAP2A/SMAD6/STRA6/CEP55/PLCE1/FRAS1/OSR1/SLIT2/ADAMTS16/NOTCH1/KIRREL3/BMP6/ANGPT1/FLCN/MYO1E/HOXB13/ACE/N…	122
GO:0050808	synapse organization	142/812	1.50E-17	3.61E-15	2.49E-15	PLXND1/CACNA2D2/SEZ6/CTNNA2/NGEF/ACTN1/SNCB/ADD2/IGSF9B/PCDHB4/MTMR2/DNM1L/NRCAM/PALM/NEFH/LGMN/CBLN1/PTPRS/DVL1/NRXN2/CAPRIN2/CUX2/MDGA1/PCDHB3/EIF4G1/EPHA4/TNR/IGSF21/NRP2/PCDH17/PDZRN3/GHSR/SLITRK3/EFNB2/UNC13A/C1QL1/MAP1B/BCAN/DOCK10/PCDH8/ITPKA/ADAM10/IGF1R/NTRK3/PTPRF/LRTM1/TMEM108/SNCA/GABRB2/SDK1/INA/DRD2/KIRREL3/CNTN5/CDH8/DLG2/ANK3/POU4F1/FARP1/WNT3A/EPHB1/TIAM1/LHFPL4/NRG1/CLSTN2/SHANK…	142
GO:0030900	forebrain development	135/812	1.75E-17	3.97E-15	2.74E-15	PAX6/ISL1/SYNE2/FGFR2/PITX1/FGF10/NDE1/GLI2/FGFR1/NCOA1/GNAO1/KDM2B/LHX5/LAMB1/CRTAC1/EFNA2/SLC32A1/SALL1/PTPRS/DLX5/GLI3/LHX2/LHX6/LHX3/FGF8/KCNA1/RFX4/PHACTR1/NR2E1/TNR/SLC2A1/NRP2/NPY/NEUROG3/LRP1/BMP4/BCL11B/FEZF1/ALDH1A2/KCNC1/KIF1A/KDM6B/BTBD3/SSTR4/BCAN/DCLK1/RAX/TBX3/EMX1/NKX2-1/TBR1/SIX3/TACC2/ASCL1/ADCYAP1/SLC6A3/DMRTA2/GDF7/DLX1/TMEM108/SLIT2/EPHA5/EGFR/CRH/NOTCH1/DRD2/FEZ1/KIRREL3/POU…	135
GO:0090596	sensory organ morphogenesis	102/812	1.78E-17	3.97E-15	2.74E-15	WNT16/CYP26B1/SOX8/PAX6/TFAP2B/PRDM1/COL11A1/FGFR2/FGF10/GLI2/CELSR1/PAX2/FGFR1/ITGA8/FAT1/KDM2B/POU4F3/MYO3A/VSX1/FGF9/MAPK3/SALL1/CALB1/DLX5/HOXA1/HOXA2/GLI3/DVL1/GATA3/FGF8/PITX3/NKX3-2/TULP1/SOBP/GNAT1/EFEMP1/PRRX1/KCNQ4/OLFM3/TBX2/TWIST1/HOXC13/BMP4/SOX9/PAX8/COL5A1/ATP8A2/SPRY2/TFAP2A/FOXF2/MYO7A/STRA6/SIX3/FBN2/COL2A1/EPHA2/OSR1/LRIG1/SDK1/ZIC1/THY1/WNT3A/EPHB1/MEGF11/SKI/GRHL3/ABR/LRP5/MS…	102
GO:0060562	epithelial tube morphogenesis	118/812	1.07E-16	2.31E-14	1.59E-14	PLXND1/SOX8/FGFR2/FGF10/GLI2/CELSR1/PAX2/SIRT6/PGR/KDM2B/ESR1/LAMA1/NDRG4/TSC2/FOXF1/SALL1/SFRP1/STK3/RASIP1/MET/HOXA5/COBL/GLI3/LHX2/DVL1/GATA3/FGF8/SUFU/HAND1/FGF1/FOXP1/WNT6/EPHA4/TCF21/TBX2/TWIST1/EFNB2/BMP4/SOX9/PAX8/WNK4/PODXL/HOXD11/STARD13/MICAL2/TBX3/SPRY2/NKX2-1/LBX1/SHROOM3/EGF/CCDC40/EPHA2/LMO4/OSR1/GDF7/SLIT2/SFRP2/ADAMTS16/RSPO2/NOTCH1/PAK1/ST14/TBX6/ADAMTS12/WNT3A/SKI/GRHL3/LRP5/KI…	118
GO:0010975	regulation of neuron projection development	162/812	1.38E-16	2.88E-14	1.98E-14	HECW1/CFLAR/SARM1/PLXND1/CD38/CNTN1/EPHA3/FSTL4/LTK/SEZ6/CTNNA2/NGEF/SYT1/MAP4K4/CRMP1/SEMA3C/PLXNA2/FGFR1/MAP2/RIMS1/CHRNA3/MT3/DNM1L/NRCAM/ITGA6/DPYSL2/STX1B/PTK6/STK24/NDRG4/SFRP1/STMN2/PTPRS/CACNG7/COBL/RAPGEF1/DVL1/GATA3/CPEB3/CAPRIN2/CUX2/RASAL1/UST/NR2E1/DPYSL3/PLXNA1/DGUOK/TLX2/EPHA4/PRRX1/TNR/CNR1/TRIM67/NEUROG3/LRP1/EFNB2/MACF1/EPO/UNC13A/MAP1B/ZSWIM4/RAP1GAP2/SNAP25/ATP8A2/NGF/PLXNC1/T…	162
GO:0072001	renal system development	110/812	1.62E-16	3.26E-14	2.25E-14	CYP26B1/CFLAR/SOX8/TFAP2B/WWTR1/FGFR2/FGF10/GLI2/ACAT1/PAX2/FGFR1/ITGA8/TP73/AKR1B1/ITGA6/ANGPT2/CYP26A1/MMP9/SMAD7/FOXF1/SALL1/CALB1/SFRP1/GLI3/GATA3/FGF8/ZBTB16/SIM1/TBX18/FGF1/WNT6/SDC1/EPHA4/NID1/TCF21/EFNB2/BMP4/SOX9/PAX8/WNK4/MPST/PODXL/HOXD11/ALDH1A2/ITGB4/PDGFRA/TFAP2A/SMAD6/STRA6/CEP55/PLCE1/FRAS1/OSR1/SLIT2/ADAMTS16/NOTCH1/KIRREL3/BMP6/ANGPT1/FLCN/MYO1E/ACE/NFIA/KIF26B/HEYL/SPRY1/HPGD/B…	110
GO:0019932	second-messenger-mediated signaling	147/812	1.90E-16	3.70E-14	2.55E-14	TBXA2R/NOS2/PTGER3/PDE4A/HDAC4/INPP5A/GAL/DGKD/LAT2/GNAS/NOS1/SLC9A1/JPH4/ITPR3/CHGA/NFATC2/MGRN1/HOMER2/GRIN2D/RUNDC3A/CAMKK2/OPRM1/CCR6/PDE10A/PDE4D/GNAI2/PEX5L/FHL2/NR5A2/ADRA1A/PPP3CC/CCRL2/PTGFR/RAMP3/ITPR2/MT2A/SOX9/CCR7/KDR/ADCY4/TRPM4/NFATC1/SSTR4/MTNR1B/EDNRB/NR5A1/ADCY3/LHCGR/PLCE1/PDE5A/CDH13/KSR1/GNAL/ADCYAP1/EPHA5/ANK2/EGFR/CRH/DRD2/GPHA2/CACNA1C/GUCY1A2/DDAH1/JPH3/PRKCA/GPR26/GPR78/…	147
GO:0072073	kidney epithelium development	66/812	4.85E-16	9.18E-14	6.32E-14	SOX8/TFAP2B/WWTR1/FGFR2/ACAT1/PAX2/FGFR1/SMAD7/SALL1/CALB1/SFRP1/GLI3/GATA3/FGF8/SIM1/FGF1/WNT6/SDC1/EPHA4/TCF21/EFNB2/BMP4/SOX9/PAX8/WNK4/PODXL/HOXD11/SMAD6/OSR1/SLIT2/ADAMTS16/NOTCH1/MYO1E/KIF26B/HEYL/SPRY1/BMPER/SHH/RET/SMAD3/GDNF/NPNT/IRX1/IRX2/BCL2/CD34/FOXC2/BASP1/IRX3/CTNNBIP1/WT1/PBX1/PTCH1/MAGI2/FAT4/DLL1/POU3F3/LHX1/HOXA11/SIX4/EPCAM/LIF/FOXJ1/GREB1L/PTPRO/WNT7B	66
GO:0001763	morphogenesis of a branching structure	82/812	9.26E-16	1.70E-13	1.17E-13	PLXND1/SOX8/BTBD7/PRDM1/FGFR2/FGF10/TP63/GLI2/SEMA3C/CELSR1/PAX2/SIRT6/FGFR1/PGR/ESR1/LAMA1/FOXF1/SALL1/SFRP1/RASIP1/MET/HOXA5/GLI3/FGF8/FGF1/PLXNA1/WNT6/TCF21/BMP4/SOX9/PAX8/HOXD11/HOXD13/TBX3/SPRY2/NKX2-1/EGF/RERE/EPHA2/GDF7/SLIT2/SFRP2/ADAMTS16/RSPO2/NOTCH1/PAK1/DRD2/ST14/HOXB13/LRP5/SPRY1/TBX20/SHH/GBX2/GDNF/NPNT/SHOX2/BCL2/FOXC2/GRB2/CTNNBIP1/SOCS3/WT1/PBX1/PTCH1/RXRA/COL4A1/FAT4/SRC/NOTCH4/…	82
GO:0050890	cognition	109/812	1.08E-15	1.92E-13	1.32E-13	TAC1/NRXN3/RASGRF1/ITGA8/VDAC3/KCNK2/OPRK1/JPH4/ITPR3/KCNK10/LGMN/HRH3/NTSR1/CHRNA4/NDRG4/CALB1/TUSC3/SLC17A7/HOXA1/NPTX2/CPEB3/NRXN2/CUX2/SOBP/HRH2/TNR/SLC8A2/CNR1/SGK1/GHSR/EGR2/SLC12A5/ATXN1/PRKCG/LDLR/C1QL1/SNAP25/CHL1/NGF/TBR1/PAK6/STRA6/ADCY3/LHCGR/CRHBP/TTBK1/EGFR/CRH/DRD2/ITGB1/JAKMIP1/JPH3/ADCY8/SORCS3/SLC6A1/DGKI/SHANK1/SHANK2/LHX8/LMX1A/EN1/GPR155/UCN/ADCY1/NETO1/FAM107A/GRM5/RGS14/DRD…	109
GO:0048704	embryonic skeletal system morphogenesis	50/812	2.16E-15	3.75E-13	2.58E-13	ALX4/COL11A1/FGFR2/GNAS/TBX15/HOXA1/HOXA2/HOXA3/HOXA5/HOXA6/GLI3/MDFI/PRRX1/HOXB8/HOXB3/HOXB1/HOXA7/TWIST1/RUNX2/BMP4/HOXD3/HOXD9/HOXD10/PDGFRA/TFAP2A/COL2A1/OSR1/MMP16/ALX3/OSR2/SMAD3/SHOX2/HOXD4/CHST11/FOXC2/IRX5/SOX11/DSCAML1/ALX1/HOXC9/HOXB4/TBX1/PAX5/HOXA4/HOXC4/LHX1/HOXA11/GRHL2/SIX4/HOXC11	50
GO:0048565	digestive tract development	63/812	2.64E-15	4.45E-13	3.06E-13	ALX4/PRDM1/CLDN18/FGFR2/FGF10/TP63/GLI2/ITGA6/PTK6/KLF5/FGF9/FOXF1/SALL1/SFRP1/HOXA5/COBL/RARRES2/AGR2/GLI3/NKX3-2/HRH2/TCF21/NKX2-3/TBX2/NPY/CDKN1A/BMP4/NKX2-2/HOXD13/ALDH1A2/GATA5/PYY/ITGB4/PDGFRA/EDNRB/FOXF2/STRA6/ASCL1/CCDC40/SFRP2/PDGFC/EGFR/NOTCH1/PKDCC/SHH/SOX17/RET/RBPMS2/SMAD3/SHOX2/BCL2/DAB1/SOX11/FOXE1/NKX2-6/FAT4/SPDEF/OVOL2/PDX1/IHH/FOXL1/EPHB3/TNF	63
GO:0021675	nerve development	45/812	3.02E-15	4.95E-13	3.41E-13	ISL1/PAX2/POU4F3/SALL1/HOXA1/HOXA3/GLI3/PHOX2B/TCIRG1/ITGA4/NRP2/HOXB3/HOXB1/EGR2/NKX2-2/PRKCG/HOXD3/UNC13A/NGF/TFAP2A/LRIG1/GABRB2/POU4F1/EPHB1/VCAM1/PHOX2A/RET/GABRB3/NAV2/NRTN/HES3/BDNF/NEUROG1/TBX1/NTF3/GABRA5/COL25A1/NTRK1/MAFB/PLXNA4/ERBB3/SIX4/SLITRK6/NTF4/TIFAB	45
GO:0061138	morphogenesis of a branching epithelium	77/812	3.33E-15	5.32E-13	3.67E-13	PLXND1/SOX8/BTBD7/FGFR2/FGF10/TP63/GLI2/SEMA3C/CELSR1/PAX2/SIRT6/FGFR1/PGR/ESR1/LAMA1/FOXF1/SALL1/SFRP1/RASIP1/MET/HOXA5/GLI3/FGF8/FGF1/PLXNA1/WNT6/TCF21/BMP4/SOX9/PAX8/HOXD11/HOXD13/TBX3/SPRY2/NKX2-1/EGF/EPHA2/GDF7/SLIT2/SFRP2/ADAMTS16/RSPO2/NOTCH1/PAK1/ST14/HOXB13/LRP5/SPRY1/TBX20/SHH/GBX2/GDNF/NPNT/BCL2/FOXC2/GRB2/CTNNBIP1/SOCS3/WT1/PBX1/PTCH1/RXRA/COL4A1/FAT4/SRC/NOTCH4/LHX1/HOXA11/GRHL2/SIX4…	77
GO:0007611	learning or memory	97/812	5.04E-15	7.87E-13	5.42E-13	TAC1/NRXN3/RASGRF1/ITGA8/VDAC3/KCNK2/OPRK1/JPH4/ITPR3/KCNK10/LGMN/NTSR1/NDRG4/CALB1/SLC17A7/NPTX2/CPEB3/NRXN2/CUX2/HRH2/TNR/SLC8A2/CNR1/SGK1/GHSR/EGR2/SLC12A5/ATXN1/PRKCG/LDLR/C1QL1/SNAP25/NGF/TBR1/PAK6/STRA6/ADCY3/CRHBP/TTBK1/EGFR/CRH/DRD2/ITGB1/JPH3/ADCY8/SORCS3/SLC6A1/DGKI/SHANK1/SHANK2/LHX8/LMX1A/EN1/UCN/ADCY1/NETO1/GRM5/RGS14/DRD5/FOS/NEUROD2/FOXB1/SYNPO/CNTNAP2/NPAS4/BDNF/GRIN1/NRXN1/GPR88/…	97
GO:0050769	positive regulation of neurogenesis	132/812	9.21E-15	1.40E-12	9.66E-13	CFLAR/PLXND1/SOX8/PAX6/SPAG9/CNTN1/EPHA3/LTK/SYT1/TCF3/GLI2/PLXNA2/FGFR1/TP73/RIMS1/NCOA1/DNM1L/DNMT3B/NRCAM/ITGA6/PTK6/NDRG4/STMN2/CACNG7/COBL/GLI3/KDM4C/RAPGEF1/DVL1/CPEB3/PHOX2B/CAPRIN2/CUX2/RASAL1/OPRM1/DPYSL3/PLXNA1/EIF4G1/EPHA4/ARHGEF2/CNR1/TRIM67/SOCS2/NEUROG3/LRP1/BMP4/IL1B/NKX2-2/MACF1/FEZF1/HOXD3/EPO/UNC13A/MAP1B/ATP8A2/NGF/PLXNC1/MMD2/SKIL/ITPKA/ASCL1/DUOXA1/NTRK3/SH3GL3/ADCYAP1/DMRTA2…	151
GO:0006836	neurotransmitter transport	100/812	1.07E-14	1.59E-12	1.09E-12	BAIAP3/SLC6A13/SYT7/APBA2/SYT1/CHAT/CAMK2A/SLC6A15/RIMS1/CHRNA3/DNM1L/RPH3A/NOS1/SLC17A6/STX1B/RIMS4/DNAJC5/HRH3/NTSR1/CHRNA4/SLC32A1/SLC6A2/SLC17A7/NAPA/DVL1/P2RX1/NRXN2/LIN7A/SLC6A12/SLC5A7/RGS4/CNR1/ADRA1A/GIPC1/GRM4/PRKCG/SYNGR3/GAD1/SLC44A2/SYT5/UNC13A/SLC6A6/SLC6A11/DDC/SNAP25/SYT6/GAD2/ADCYAP1/SLC6A3/PPFIA4/SNCA/CPLX2/SLC22A3/CRH/CACNA1B/DRD2/PTPRN2/SLC6A1/SYN2/DGKI/SLC6A20/SLC6A18/ADCY1/S…	100
GO:0021515	cell differentiation in spinal cord	35/812	1.48E-14	2.14E-12	1.48E-12	PAX6/PAX7/ISL1/DMRT3/GLI2/LHX5/EVX1/GLI3/LHX3/SUFU/DBX1/MDGA1/LHX4/NKX2-2/HOXD10/LBX1/ASCL1/MDGA2/LMO4/GDF7/NOTCH1/WNT3A/ISL2/TAL1/NKX6-1/TBX20/SHH/PHOX2A/GSX1/OLIG3/HOXC10/SOX1/PTCH1/OLIG2/LHX1	35
GO:0034329	cell junction assembly	134/812	2.81E-14	3.90E-12	2.68E-12	PLXND1/CD9/EPHA3/LAMA3/PKP2/LIMCH1/CBFB/MAP4K4/ACTN1/ADD2/FSCN1/ACTN2/PCDHB4/EPB41L3/SLC9A1/NRCAM/ITGA6/SORBS1/SMAD7/ARHGEF7/CBLN1/SFRP1/PTPRS/RAPGEF1/DVL1/NRXN2/CORO1C/CUX2/MDGA1/PCDHB3/EIF4G1/PCDH17/GHSR/SLITRK3/LRP1/SNAI1/EFNB2/MACF1/KDR/MAP1B/ITGB4/RAC1/NTRK3/CDH13/TBCD/EPHA2/LRTM1/SNCA/ANK2/CDH18/GABRB2/SDK1/DRD2/KIRREL3/CDH22/CNTN5/MPP7/CDH8/DST/POU4F1/FARP1/THY1/PRKCA/WNT3A/FLCN/EPHB1/LHFP…	134
GO:0001822	kidney development	101/812	3.29E-14	4.46E-12	3.08E-12	CYP26B1/CFLAR/SOX8/TFAP2B/WWTR1/FGFR2/FGF10/GLI2/ACAT1/PAX2/FGFR1/ITGA8/TP73/AKR1B1/ANGPT2/CYP26A1/MMP9/SMAD7/SALL1/CALB1/SFRP1/GLI3/GATA3/FGF8/ZBTB16/SIM1/FGF1/WNT6/SDC1/EPHA4/NID1/TCF21/EFNB2/BMP4/SOX9/PAX8/WNK4/MPST/PODXL/HOXD11/ALDH1A2/PDGFRA/TFAP2A/SMAD6/STRA6/PLCE1/FRAS1/OSR1/SLIT2/ADAMTS16/NOTCH1/KIRREL3/BMP6/ANGPT1/FLCN/MYO1E/ACE/KIF26B/HEYL/SPRY1/HPGD/BMPER/SHH/OSR2/RET/FBN1/SMAD3/GDNF/N…	101
GO:0043583	ear development	85/812	5.02E-14	6.66E-12	4.59E-12	KCNQ1/COL11A1/FGFR2/FGF10/GLI2/CELSR1/PAX2/FGFR1/ITGA8/KCNK2/POU4F3/MYO3A/TRIP11/FGF9/MAPK3/SALL1/CALB1/DLX5/HOXA1/HOXA2/GLI3/LHX3/DVL1/GATA3/FGF8/PHOX2B/NKX3-2/LIN7A/SOBP/EPHA4/PRRX1/KCNQ4/ECE1/TWIST1/BMP4/SOX9/PAX8/TCF15/ATP8A2/SPRY2/ANP32B/TFAP2A/MYO7A/ADAM10/STRA6/COL2A1/NTRK3/OSR1/LRIG1/GABRB2/NOTCH1/ZIC1/WNT3A/GRHL3/ABR/NEUROD1/MSX1/BMPER/SHH/OSR2/GJB2/GABRB3/GBX2/CYTL1/KCNK3/BCL2/PRKRA/NEU…	85
GO:0045666	positive regulation of neuron differentiation	124/812	5.18E-14	6.73E-12	4.64E-12	CFLAR/PLXND1/SPAG9/CNTN1/EPHA3/LTK/SYT1/TCF3/GLI2/PLXNA2/FGFR1/RIMS1/NCOA1/DNM1L/DNMT3B/NRCAM/ITGA6/PTK6/NDRG4/STMN2/CACNG7/COBL/KDM4C/RAPGEF1/DVL1/CPEB3/PHOX2B/CAPRIN2/CUX2/RASAL1/DPYSL3/PLXNA1/EIF4G1/EPHA4/ARHGEF2/CNR1/TRIM67/SOCS2/NEUROG3/LRP1/BMP4/NKX2-2/MACF1/FEZF1/HOXD3/EPO/UNC13A/MAP1B/ATP8A2/NGF/PLXNC1/MMD2/SKIL/ITPKA/ASCL1/DUOXA1/NTRK3/SH3GL3/ADCYAP1/ABL2/GDF7/DLX1/SLIT2/PAK1/FEZ1/POU4F2…	124
GO:0001656	metanephros development	47/812	6.38E-14	8.12E-12	5.60E-12	SOX8/TFAP2B/WWTR1/FGF10/ACAT1/PAX2/ITGA8/AKR1B1/SALL1/CALB1/GLI3/GATA3/FGF8/TCF21/BMP4/SOX9/PAX8/PDGFRA/FRAS1/OSR1/KIF26B/SPRY1/SHH/OSR2/RET/FBN1/GDNF/IRX1/IRX2/BCL2/CD34/FOXC2/BASP1/IRX3/WT1/PTCH1/FAT4/NF1/POU3F3/LHX1/HOXA11/SIX4/HOXC11/LIF/FOXJ1/GREB1L/WNT7B	47
GO:0048732	gland development	139/812	6.82E-14	8.47E-12	5.84E-12	MAD1L1/CFLAR/PLXND1/PAX6/BTBD7/ISL1/DKK3/FGFR2/PITX1/FGF10/TP63/GLI2/SEMA3C/ACAT1/FGFR1/HOXA9/AACS/PGR/NCOA1/ESR1/HNF4A/LAMA1/MAPK3/FOXF1/SALL1/SFRP1/MET/HOXA3/HOXA5/COBL/GLI3/LHX3/GATA3/FGF8/HRH2/PLXNA1/TCF21/NKX2-3/HOXB3/SOCS2/TBX2/CIT/GCM2/BMP4/SOX9/PAX8/PAX1/BCL11B/MPST/HOXD3/HOXD9/HOXD13/ALDH1A2/CDO1/PDGFRA/TBX3/ELF5/NKX2-8/NKX2-1/NR5A1/STRA6/SIX3/EGF/ASCL1/ADCYAP1/CCDC40/TNFRSF11A/SLC6A3/EP…	139
GO:0060560	developmental growth involved in morphogenesis	89/812	6.92E-14	8.47E-12	5.84E-12	FSTL4/CYFIP2/FGFR2/SYT1/GAL/FGF10/SEMA3C/SIRT6/MAP2/RIMS1/HSP90AA1/MT3/POU4F3/NRCAM/ESR1/DPYSL2/SALL1/SFRP1/PTPRS/CACNG7/COBL/LHX2/DVL1/RASAL1/FGF1/PLXNA1/ITGA4/TNR/NRP2/TBX2/LRP1/BMP4/SOX9/MACF1/HOXD13/UNC13A/MAP1B/DCLK1/NGF/EMX1/SPRY2/NTRK3/BARHL2/TMEM108/SLIT2/SFRP2/NOTCH1/PAK1/ITGB1/POU4F2/WNT3A/TIAM1/AUTS2/KIF26B/NKX6-1/RYK/SPRY1/SHH/ISLR2/ZEB2/DSCAM/RIMS2/BDNF/ULK1/CDH4/SLIT3/EFNA5/SEMA4B/M…	89
GO:0048665	neuron fate specification	26/812	7.86E-14	9.44E-12	6.51E-12	PAX6/ISL1/DMRT3/GLI2/EVX1/GLI3/LHX3/SUFU/DBX1/NKX2-2/HOXD10/LBX1/ASCL1/NTRK3/DMRTA2/POU4F1/ISL2/NKX6-1/TLX3/OLIG3/HOXC10/SOX1/MYT1L/DLL1/ESRP1/FOXA1	26
GO:0021510	spinal cord development	52/812	8.19E-14	9.64E-12	6.65E-12	PAX6/PAX7/ISL1/DMRT3/GLI2/ACTL6B/LHX5/PTPRS/EVX1/GLI3/LHX3/SUFU/DBX1/RFX4/MDGA1/HOXB8/LHX4/NEUROG3/NKX2-2/MPST/HOXD10/LBX1/ASCL1/MDGA2/LMO4/GDF7/NOTCH1/BAG3/ZIC1/WNT3A/ISL2/TAL1/NKX6-1/TBX20/SHH/UNCX/PHOX2A/GDNF/GSX1/FOXB1/DAB1/SOX11/OLIG3/HOXC10/SOX1/PTCH1/DCC/NF1/DLL1/OLIG2/LHX1/NEFL	52
GO:0021537	telencephalon development	92/812	1.46E-13	1.67E-11	1.15E-11	PAX6/SYNE2/NDE1/NCOA1/KDM2B/LHX5/LAMB1/CRTAC1/EFNA2/SLC32A1/SALL1/PTPRS/DLX5/GLI3/LHX2/LHX6/FGF8/KCNA1/RFX4/PHACTR1/NR2E1/TNR/SLC2A1/NPY/LRP1/BMP4/BCL11B/FEZF1/KDM6B/BTBD3/BCAN/EMX1/NKX2-1/TBR1/SIX3/TACC2/ASCL1/DMRTA2/DLX1/TMEM108/SLIT2/EPHA5/EGFR/DRD2/FEZ1/KIRREL3/FEZF2/WNT3A/NRG1/SKI/HTR6/IGF2BP1/LMX1A/NEUROD1/EOMES/RYK/SHH/UNCX/SLITRK5/AVPR1A/TRAPPC9/MFSD2A/ZEB2/ROBO1/EMX2/DCLK2/CDH2/ALK/CDK5R…	92
GO:0050806	positive regulation of synaptic transmission	70/812	1.47E-13	1.67E-11	1.15E-11	TAC1/BAIAP3/SYT1/SCGN/RIMS1/IGSF9B/DNM1L/ITPR3/STX1B/LGMN/RIMS4/NTSR1/CALB1/GRIN2D/CACNG7/CRHR2/DVL1/CUX2/NR2E1/EPHA4/TNR/RGS4/SLC8A2/CNR1/ADRA1A/TSHZ3/UNC13A/SNAP25/ADCYAP1/CACNG8/SNCA/EGFR/CRH/DRD2/ADCY8/CLSTN2/SQSTM1/GRIN2C/SHANK1/SHANK2/GRIK2/ADCY1/CACNB2/NETO1/FAM107A/RGS14/PRKCE/CLSTN1/BAIAP2/RIMS2/GRIN1/NRXN1/SHISA7/NF1/NTRK1/ARC/GRIN2B/CACNG3/PTGS2/STX1A/CCL2/NMU/KMO/CCR2/APOE/LILRB2/CX3C…	70
GO:0007626	locomotory behavior	78/812	2.19E-13	2.44E-11	1.68E-11	APBA2/USP2/PREX2/SEZ6/DMRT3/CELSR1/CHRNA3/OPRK1/GNAO1/NTSR1/CHRNA4/CALB1/GRIN2D/PITX3/OPRM1/SOBP/GRM6/FGF12/EPHA4/TNR/OPRD1/HOXB8/GHSR/SLURP1/GAD1/HOXD9/HOXD10/C1QL1/SNAP25/CHL1/NKX2-1/PAK6/ZFHX3/SLC6A3/SNCA/GLRA1/CRH/CACNA1B/DRD2/KLHL1/EPS8/ASTN1/GRM1/ZIC1/FEZF2/UCHL1/ADCY8/NRG1/SPTBN4/TAL1/LMX1A/EN1/NPY1R/SLC18A2/NAV2/GDNF/GRM5/GPR37/TRH/ALK/PRKCE/DSCAM/ADCY5/DAB1/GRIN1/PENK/GPR88/BTBD9/CEND1/N…	78
GO:0034765	regulation of ion transmembrane transport	149/812	2.55E-13	2.79E-11	1.92E-11	HECW1/CACNA1G/CACNA2D2/KCNG1/KCNQ1/KCNH2/RASGRF1/KCNAB2/GAL/TRPM5/ACTN2/OPRK1/REM1/TESC/NOS1/FXYD3/SLC9A1/JPH4/HCN2/CACNA1I/KCNK10/MMP9/NTSR1/FGF14/CORO1A/KCNA7/CACNG7/STIM2/TCIRG1/KCNA1/OPRM1/PDE4D/FGF12/KCNQ4/RGS4/GRIA2/KCNJ8/RAMP3/TWIST1/KCNS1/AHNAK/WNK4/KCNC1/ATP1B2/KCNA6/KCNA5/DPP6/EPO/CACNG6/KCNC3/MTNR1B/DYSF/STAC2/CACNA1A/CACNG8/CNIH3/PSEN2/OSR1/STAC/SNCA/ANK2/CRHBP/CRH/CACNA1B/DRD2/TMC2/F…	149
GO:0060485	mesenchyme development	99/812	3.17E-13	3.36E-11	2.32E-11	WNT16/SOX8/ISL1/WWTR1/EPHA3/FGFR2/FGF10/SEMA3C/PAX2/FGFR1/TBX5/DLL3/SMAD7/FGF9/MAPK3/FOXF1/SFRP1/AMH/HOXA5/FGF8/COL1A1/PHOX2B/CORO1C/GCNT2/HAND1/MAD2L2/NRP2/TCF21/TBX2/TWIST1/SNAI1/BMP4/SOX9/IL1B/PAX1/TCF15/ALDH1A2/GATA5/EDNRB/NKX2-1/FOXF2/ACTA1/OSR1/SFRP2/CRB2/NOTCH1/TCF7L2/HMGA2/WNT3A/TIAM1/NRG1/ACTC1/FGF19/PDPN/MSX1/EOMES/HEYL/SPRY1/PITX2/HAND2/TBX20/SHH/RET/NOLC1/GREM1/SMAD3/GBX2/GDNF/AXIN2/Z…	99
GO:0042476	odontogenesis	59/812	3.18E-13	3.36E-11	2.32E-11	DMRT3/FGFR2/FGF10/TP63/GLI2/FGF4/GNAO1/LAMB1/ITGA6/SMPD3/GLI3/FGF8/COL1A1/TCIRG1/HAND1/WNT6/SDC1/NKX2-3/TWIST1/RUNX2/BMP4/BCL11B/ITGB4/PDGFRA/TFAP2A/SLC24A4/OSR1/DLX1/RSPO2/FOXO1/ADAMTS5/ALPL/LHX8/MSX1/PITX2/HAND2/SHH/OSR2/HTRA1/STIM1/ANKRD11/KLK4/AXIN2/BSG/CD34/FAM20C/TBX1/SP6/SRC/PAX9/BGLAP/AQP6/SNX10/PERP/CSF3R/MSX2/TUFT1/AQP5/AMTN	59
GO:0048754	branching morphogenesis of an epithelial tube	64/812	4.42E-13	4.60E-11	3.17E-11	PLXND1/SOX8/FGFR2/FGF10/GLI2/CELSR1/PAX2/SIRT6/PGR/ESR1/LAMA1/FOXF1/SALL1/RASIP1/MET/HOXA5/GLI3/FGF8/FGF1/WNT6/TCF21/BMP4/SOX9/PAX8/HOXD11/TBX3/SPRY2/NKX2-1/EGF/EPHA2/GDF7/SLIT2/SFRP2/ADAMTS16/RSPO2/NOTCH1/PAK1/LRP5/SPRY1/TBX20/SHH/GBX2/GDNF/NPNT/BCL2/FOXC2/CTNNBIP1/WT1/PBX1/PTCH1/COL4A1/FAT4/SRC/NOTCH4/LHX1/HOXA11/SIX4/ESRP2/AREG/MSX2/FOXA1/GREB1L/IHH/TNF	64
GO:0035270	endocrine system development	57/812	6.44E-13	6.59E-11	4.54E-11	PAX6/ISL1/DKK3/PITX1/FGF10/GLI2/HNF4A/MAPK3/SALL1/HOXA3/HOXA5/LHX3/GATA3/FGF8/HOXB3/NEUROG3/GCM2/BMP4/SOX9/PAX8/PAX1/NKX2-2/HOXD3/ALDH1A2/PDGFRA/NKX2-1/NR5A1/STRA6/SIX3/ASCL1/ADCYAP1/SLC6A3/CRH/DRD2/FOXO1/BMP6/NEUROD1/MSX1/NKX6-1/PITX2/SHH/SMAD3/GSX1/ONECUT1/OTP/INSM1/FOXE1/NKX2-5/TBX1/WT1/PBX1/NF1/DLL1/ONECUT2/FOXA2/SOX3/PDX1	57
GO:0001823	mesonephros development	49/812	1.16E-12	1.17E-10	8.04E-11	SOX8/FGFR2/FGF10/PAX2/FGFR1/SMAD7/SALL1/CALB1/SFRP1/GLI3/GATA3/FGF8/ZBTB16/SIM1/FGF1/WNT6/SDC1/TCF21/BMP4/SOX9/PAX8/HOXD11/SMAD6/OSR1/SLIT2/ADAMTS16/KIF26B/SPRY1/BMPER/SHH/OSR2/RET/SMAD3/GDNF/NPNT/BCL2/FOXC2/BASP1/CTNNBIP1/WT1/PBX1/PTCH1/FAT4/LHX1/HOXA11/SIX4/EPCAM/FOXJ1/GREB1L	49
GO:0072009	nephron epithelium development	32/812	1.46E-12	1.45E-10	9.97E-11	SOX8/TFAP2B/WWTR1/ACAT1/PAX2/SALL1/CALB1/GLI3/GATA3/FGF8/FGF1/WNT6/TCF21/BMP4/SOX9/PAX8/WNK4/PODXL/HOXD11/OSR1/ADAMTS16/NOTCH1/MYO1E/KIF26B/HEYL/SHH/GDNF/NPNT/IRX1/IRX2/BCL2/CD34/FOXC2/BASP1/IRX3/CTNNBIP1/WT1/PBX1/PTCH1/MAGI2/FAT4/DLL1/POU3F3/LHX1/HOXA11/SIX4/LIF/FOXJ1/GREB1L/PTPRO/WNT7B	51
GO:0009914	hormone transport	47/812	3.43E-12	3.34E-10	2.30E-10	CD38/TAC1/NOS2/CACNA2D2/BAIAP3/NADK/TFAP2B/SYT7/ISL1/ABCC2/PTPRN/GAL/MAP4K4/SREBF1/FGFR1/AACS/OPRK1/GNAS/LTBP4/RAB11FIP3/ITPR3/CHGA/HNF4A/SMPD3/CRYM/SFRP1/GCK/GATA3/TCIRG1/POMC/PASK/SLC2A1/CNR1/GHSR/ITPR2/LRP1/IL1B/PAX8/VGF/KCNA5/TRPM4/ANO1/SNAP25/GRP/MTNR1B/TBX3/RAC1/IL1RN/ADCYAP1/CACNA1A/ILDR2/EPHA5/CRHBP/EGFR/CRH/TCF7L2/DRD2/CACNA1C/BMP6/PRKCA/PTPRN2/SLC16A1/ADCY8/TIAM1/KCNB1/LRP5/NEUROD1/NKX6…	106
GO:0061448	connective tissue development	95/812	3.49E-12	3.35E-10	2.31E-10	CFLAR/SOX8/PAX7/RUNX3/CD44/COL11A1/PITX1/EVC/GLI2/ACAT1/FGF4/FGFR1/AACS/GNAS/TRIP11/FGF9/MAPK3/SMPD3/IMPAD1/COMP/HOXA3/HOXA5/GLI3/COL1A1/NKX3-2/ZBTB16/SOX6/HAND1/EFEMP1/PRRX1/MEF2D/HOXB3/MATN4/SNAI1/RUNX2/BMP4/SOX9/HOXD3/TRPM4/COL5A1/SORL1/COL2A1/COL6A2/OSR1/GDF7/SFRP2/CSGALNACT1/RSPO2/NOTCH1/HMGA2/ADAMTS12/POU4F2/BMP3/BMP6/GDF6/ACAN/LRP5/PKDCC/MSX1/NPPC/HAND2/UNCX/OSR2/VWA2/GREM1/SMAD3/LTBP3/AXI…	95
GO:0072006	nephron development	60/812	3.90E-12	3.69E-10	2.54E-10	CFLAR/SOX8/TFAP2B/WWTR1/ACAT1/PAX2/ANGPT2/SALL1/CALB1/GLI3/GATA3/FGF8/FGF1/WNT6/NID1/TCF21/BMP4/SOX9/PAX8/WNK4/PODXL/HOXD11/PDGFRA/PLCE1/OSR1/ADAMTS16/NOTCH1/KIRREL3/ANGPT1/MYO1E/KIF26B/HEYL/SHH/RET/GDNF/NPNT/IRX1/IRX2/BCL2/CD34/FOXC2/BASP1/IRX3/CTNNBIP1/WT1/PBX1/PTCH1/MAGI2/FAT4/DLL1/POU3F3/LHX1/HOXA11/ITGA3/SIX4/LIF/FOXJ1/GREB1L/PTPRO/WNT7B	60
GO:0007517	muscle organ development	45/812	5.01E-12	4.67E-10	3.22E-10	CYP26B1/CFLAR/SOX8/PAX7/ISL1/MYOM2/USP2/ALX4/PKP2/COL11A1/GPC1/FGFR2/HDAC4/PITX1/SPEG/EVC/SIRT6/FGFR1/TP73/KCNK2/TBX5/TLL2/ASB2/SMAD7/KLF5/FGF9/MYH14/MEOX2/FGF8/PHOX2B/SOX6/MYF6/BVES/HAND1/BCL9/MEF2D/RGS4/TNNT2/TCF21/TBX2/TWIST1/EGR2/EFNB2/BMP4/TCF15/HIVEP3/FGFRL1/SGCE/HOXD9/HOXD10/MYOD1/MYBPC3/PAX3/ITGA11/STRA6/LBX1/ZFHX3/DMRTA2/ACTA1/MYH15/MEGF10/GTF3C5/NOTCH1/VAX1/PAK1/TAGLN/MKX/POU4F1/WNT3A/C…	128
GO:0009954	proximal/distal pattern formation	23/812	6.56E-12	6.01E-10	4.14E-10	CYP26B1/FGF10/TP63/GLI2/HOXA9/GLI3/HOXD9/HOXD10/ALDH1A2/SIX3/OSR1/DLX1/EN1/SP8/IRX1/IRX2/IRX3/HOXC10/PBX1/DLL1/HOXA10/HOXA11/HOXC11	23
GO:0048167	regulation of synaptic plasticity	72/812	6.65E-12	6.01E-10	4.14E-10	CD38/SYT7/RASGRF1/CAMK2A/SCGN/RIMS1/JPH4/ITPR3/LGMN/RIMS4/FGF14/CBLN1/CALB1/GRIN2D/CRHR2/CPEB3/NR2E1/HRH2/EPHA4/TNR/SLC8A2/TSHZ3/EGR2/GIPC1/UNC13A/MAP1B/SNAP25/ITPKA/CNTN4/SNCA/CPLX2/STAR/CRH/DRD2/JPH3/ADCY8/SORCS3/DGKI/KCNB1/SQSTM1/GRIN2C/SHANK1/SHANK2/GRIK2/ADCY1/NETO1/PRRT2/FAM107A/GRM5/RGS14/DRD5/NEUROD2/SYNPO/NPAS4/HRAS/BAIAP2/RIMS2/GRIN1/SORCS2/MAPT/SHISA7/SHISA6/HRH1/NF1/SIPA1L1/ARC/SHISA9…	72
GO:0046879	hormone secretion	103/812	6.89E-12	6.14E-10	4.23E-10	CD38/TAC1/NOS2/CACNA2D2/BAIAP3/NADK/TFAP2B/SYT7/ISL1/PTPRN/GAL/MAP4K4/SREBF1/FGFR1/AACS/OPRK1/GNAS/LTBP4/RAB11FIP3/ITPR3/CHGA/HNF4A/SMPD3/SFRP1/GCK/GATA3/TCIRG1/POMC/PASK/SLC2A1/CNR1/GHSR/ITPR2/LRP1/IL1B/PAX8/VGF/KCNA5/TRPM4/ANO1/SNAP25/GRP/MTNR1B/TBX3/RAC1/IL1RN/ADCYAP1/CACNA1A/ILDR2/EPHA5/CRHBP/EGFR/CRH/TCF7L2/DRD2/CACNA1C/BMP6/PRKCA/PTPRN2/SLC16A1/ADCY8/TIAM1/KCNB1/LRP5/NEUROD1/NKX6-1/UCN/CART…	103
GO:0060537	muscle tissue development	127/812	7.61E-12	6.69E-10	4.61E-10	CYP26B1/CFLAR/SOX8/PAX7/ISL1/MYOM2/PKP2/COL11A1/GPC1/FGFR2/HDAC4/PITX1/SEMA3C/SIRT6/ACTN2/FGFR1/ITGA8/TP73/KCNK2/NOX4/TBX5/SLC9A1/TLL2/ASB2/SMAD7/KLF5/FGF9/NDRG4/PPP1R13L/MYH14/MEOX2/FGF8/PHOX2B/SOX6/MYF6/BVES/HAND1/BCL9/MEF2D/RGS4/TNNT2/TCF21/ADRA1A/TBX2/TWIST1/EGR2/EFNB2/BMP4/SOX9/HIVEP3/HOXD9/HOXD10/ALDH1A2/MYOD1/GATA5/KDM6B/MYH11/MYBPC3/PDGFRA/TBX3/STRA6/SIK1/DMRTA2/ACTA1/OSR1/MYH15/MEGF10/GT…	127
GO:0042391	regulation of membrane potential	133/812	8.33E-12	7.23E-10	4.98E-10	TAC1/CACNA1G/KCNQ1/KCNH2/PKP2/SEZ6/ACTN2/RIMS1/CHRNA3/IGSF9B/KCNK2/MTMR2/SLC9A1/NRCAM/STX1B/HCN2/CACNA1I/KCNK10/RIMS4/NTSR1/CHRNA4/SMAD7/FGF14/CBLN1/SLC17A7/MYH14/GRIN2D/KCNT1/DVL1/P2RX1/GABRA4/CUX2/KCNA1/OPRM1/BVES/FGF12/OPRD1/RGS4/CNR1/ADRA1A/KCNJ8/IFI6/KDR/KCNC1/ATP1B2/KCNA5/TRPM4/MTNR1B/NTRK3/ADCYAP1/CACNA1A/SH3GL1/CNIH3/PARP1/TMEM108/SNCA/ANK2/GABRA6/GABRB2/GLRA1/CACNA1B/DRD2/CACNA1C/ANK3/GP…	133
GO:0035136	forelimb morphogenesis	27/812	8.84E-12	7.53E-10	5.19E-10	TFAP2B/ALX4/TP63/HOXA9/TBX5/ZBTB16/TWIST1/RECK/RUNX2/HOXD9/HOXD10/ALDH1A2/TBX3/TFAP2A/OSR1/RSPO2/CACNA1C/ALX3/EN1/MSX1/SHH/OSR2/SHOX2/SALL3/HOXA11/MSX2/CRABP2	27
GO:0048880	sensory system development	118/812	8.93E-12	7.53E-10	5.19E-10	WNT16/SOX8/PAX6/TFAP2B/ISL1/MYOM2/LAMC3/PRDM1/FGF10/PAX2/FAT1/KDM2B/VSX1/LAMA1/FGF9/CALB1/PPP1R13L/SLC17A7/GLI3/LHX2/GATA3/PITX3/PHOX2B/TCIRG1/TULP1/NR2E1/GRM6/GNAT1/EFEMP1/WNT6/CRYGD/OLFM3/TBX2/TWIST1/NEUROD4/BMP4/SOX9/BFSP1/BCL11B/ALDH1A2/COL5A1/RAB11FIP4/ATP8A2/RAX/MTNR1B/PDGFRA/SKIL/TFAP2A/FOXF2/MYO7A/STRA6/CYP1B1/SIX3/FBN2/KERA/NTRK3/ADAMTS18/EPHA2/DLX1/MYH15/SDK1/EGFR/VAX1/CACNA1C/POU4F2/PO…	118
GO:0001657	ureteric bud development	46/812	1.00E-11	8.33E-10	5.74E-10	SOX8/FGFR2/PAX2/FGFR1/SMAD7/SALL1/CALB1/SFRP1/GLI3/GATA3/FGF8/SIM1/FGF1/WNT6/SDC1/TCF21/BMP4/SOX9/PAX8/HOXD11/SMAD6/OSR1/SLIT2/ADAMTS16/KIF26B/SPRY1/BMPER/SHH/RET/SMAD3/GDNF/NPNT/BCL2/FOXC2/BASP1/CTNNBIP1/WT1/PBX1/PTCH1/FAT4/LHX1/HOXA11/SIX4/EPCAM/FOXJ1/GREB1L	46
GO:0001503	ossification	124/812	1.26E-11	1.03E-09	7.12E-10	FGR/SOX8/TAC1/MRC2/WWTR1/CYP24A1/COL11A1/SBNO2/FGFR2/CBFB/HDAC4/TP63/GLI2/MMP2/GNAS/FGF9/MAPK3/SMPD3/XYLT1/IMPAD1/SFRP1/CLEC11A/COMP/DLX5/HOXA2/GLI3/MINPP1/KAZALD1/SUFU/COL1A1/ZBTB16/TCIRG1/MEF2D/TWIST1/EGR2/SNAI1/RUNX2/BMP4/SOX9/GFRA4/TRPM4/KREMEN2/KL/DHX9/GPNMB/TFAP2A/ITGA11/SMAD6/FBN2/COL2A1/DHH/TNFRSF11A/EPHA2/OSR1/SFRP2/EGFR/IGFBP3/CSGALNACT1/RSPO2/NOTCH1/BMP3/BMP6/WNT3A/MMP16/CREB3L1/SKI/LR…	124
GO:0022604	regulation of cell morphogenesis	144/812	1.31E-11	1.06E-09	7.32E-10	FGR/HECW1/SARM1/PLXND1/CD44/FSTL4/NGEF/SYT1/SEMA3C/PLXNA2/CAPZB/MAP2/RIMS1/CHRNA3/EPB41L3/MT3/DNM1L/NRCAM/DPYSL2/PALMD/PALM/HCK/ARHGEF7/CORO1A/ARHGEF18/MYH14/PTPRS/CACNG7/DVL1/CORO1C/CAPRIN2/CUX2/RASAL1/UST/BVES/NR2E1/PLXNA1/TLX2/EPHA4/TNR/NEUROG3/LRP1/MACF1/KDR/UNC13A/MAP1B/ZSWIM4/NGF/PLXNC1/RAC1/TBR1/SKIL/ITPKA/ADAM10/SHROOM3/RHOF/NTRK3/BARHL2/SLIT2/MYO10/RASA1/GNA12/DOCK5/FAM171A1/GAS2/PAK1/EP…	144
GO:0007498	mesoderm development	57/812	1.38E-11	1.11E-09	7.63E-10	FGFR2/TP63/PAX2/FGFR1/ITGA8/DLL3/HCK/FOXF1/AMH/ETV2/MEST/LHX2/FGF8/HAND1/TLX2/SNAI1/BMP4/TCF15/ITGB4/KDM6B/TBX3/SECTM1/EPHA2/OSR1/SFRP2/CRB2/TBX6/HMGA2/ITGB1/POU4F1/WNT3A/ETS2/TAL1/EOMES/TBX20/SHH/SOX17/SMAD3/ZFPM2/OVOL1/FOXC2/IRX3/DAND5/EXT1/TBX1/IKZF1/POFUT2/MIR1-1/BMPR2/TRIM15/MIR150/ITGB3/LHX1/HOXA11/ITGA3/BTK/FOXH1	57
GO:0042471	ear morphogenesis	52/812	1.54E-11	1.21E-09	8.33E-10	COL11A1/FGFR2/FGF10/GLI2/CELSR1/PAX2/FGFR1/ITGA8/POU4F3/MYO3A/FGF9/MAPK3/SALL1/DLX5/HOXA1/HOXA2/DVL1/GATA3/FGF8/NKX3-2/SOBP/PRRX1/KCNQ4/TWIST1/SOX9/PAX8/ATP8A2/SPRY2/TFAP2A/MYO7A/COL2A1/OSR1/LRIG1/ZIC1/WNT3A/GRHL3/ABR/MSX1/OSR2/GBX2/PRKRA/NEUROG1/TBX1/HMX3/HMX2/MAFB/SLC44A4/USH1C/SIX4/OTX1/SLITRK6/TIFAB	52
GO:0072163	mesonephric epithelium development	46/812	1.57E-11	1.21E-09	8.33E-10	SOX8/FGFR2/PAX2/FGFR1/SMAD7/SALL1/CALB1/SFRP1/GLI3/GATA3/FGF8/SIM1/FGF1/WNT6/SDC1/TCF21/BMP4/SOX9/PAX8/HOXD11/SMAD6/OSR1/SLIT2/ADAMTS16/KIF26B/SPRY1/BMPER/SHH/RET/SMAD3/GDNF/NPNT/BCL2/FOXC2/BASP1/CTNNBIP1/WT1/PBX1/PTCH1/FAT4/LHX1/HOXA11/SIX4/EPCAM/FOXJ1/GREB1L	46
GO:0072164	mesonephric tubule development	46/812	1.57E-11	1.21E-09	8.33E-10	SOX8/FGFR2/PAX2/FGFR1/SMAD7/SALL1/CALB1/SFRP1/GLI3/GATA3/FGF8/SIM1/FGF1/WNT6/SDC1/TCF21/BMP4/SOX9/PAX8/HOXD11/SMAD6/OSR1/SLIT2/ADAMTS16/KIF26B/SPRY1/BMPER/SHH/RET/SMAD3/GDNF/NPNT/BCL2/FOXC2/BASP1/CTNNBIP1/WT1/PBX1/PTCH1/FAT4/LHX1/HOXA11/SIX4/EPCAM/FOXJ1/GREB1L	46
GO:0051216	cartilage development	77/812	1.64E-11	1.25E-09	8.58E-10	PAX7/RUNX3/CD44/COL11A1/PITX1/EVC/GLI2/FGF4/FGFR1/GNAS/TRIP11/FGF9/MAPK3/SMPD3/IMPAD1/COMP/HOXA3/HOXA5/GLI3/COL1A1/NKX3-2/ZBTB16/SOX6/HAND1/EFEMP1/PRRX1/MEF2D/HOXB3/MATN4/SNAI1/RUNX2/BMP4/SOX9/HOXD3/COL2A1/COL6A2/OSR1/SFRP2/CSGALNACT1/RSPO2/HMGA2/ADAMTS12/BMP3/BMP6/GDF6/ACAN/PKDCC/MSX1/NPPC/HAND2/UNCX/OSR2/VWA2/GREM1/SMAD3/LTBP3/AXIN2/SHOX2/CYTL1/CHST11/LEP/ALX1/ANXA2/HYAL3/COL14A1/HOXC4/BMPR2/CO…	77
GO:0060541	respiratory system development	74/812	1.83E-11	1.38E-09	9.50E-10	FLT4/FGFR2/FGF10/SREBF1/GLI2/CELSR1/FGFR1/PGR/ADAMTS2/TBX5/LAMA1/FGF9/MAPK3/SMPD3/CRISPLD2/FOXF1/DLX5/HOXA5/AGR2/GLI3/LHX3/FGF8/PHOX2B/FGF1/TCF21/TBX4/BMP4/SOX9/FGFRL1/ALDH1A2/PDGFRA/SPRY2/TNS3/NKX2-8/NKX2-1/STRA6/ASCL1/CCDC40/EGFR/CRH/RSPO2/NOTCH1/HYDIN/SKI/SIM2/PDPN/PKDCC/SPRY1/SHH/LTBP3/ZFPM2/BASP1/SOX11/MSC/CCBE1/WT1/EIF4EBP1/STK40/ADAMTSL2/BMPR2/ITGA3/GRHL2/SIX4/ESRP2/SPDEF/ID1/LIF/FOXA1/FOX…	74
GO:0031589	cell-substrate adhesion	113/812	1.91E-11	1.42E-09	9.80E-10	ITGAL/CD44/EPHA3/LAMC3/LIMCH1/MAP4K4/ACTN1/ACTN2/ITGA8/COL5A3/NID2/PXN/SLC9A1/LAMB1/ITGA6/ANGPT2/SORBS1/MADCAM1/FERMT1/ARHGEF7/MSLN/CORO1A/FOXF1/SFRP1/AGR2/COL1A1/VWF/CORO1C/GCNT2/BVES/SMOC2/ITGA4/NID1/HOXA7/LRP1/CCR7/MACF1/SGCE/KDR/HOXD3/ITGB4/RAC1/ITGA11/SMAD6/CUZD1/ITGB7/FBLN5/CDH13/TBCD/MUC4/RASA1/DOCK5/NOTCH1/FERMT3/ITGB1/ADAMTS12/SPOCK1/THY1/ANGPT1/EPHB1/TIAM1/RADIL/ZYX/LYPD5/ITGB2/PDPN/VCA…	113
GO:0098742	cell-cell adhesion via plasma-membrane adhesion molecules	93/812	2.27E-11	1.67E-09	1.15E-09	ITGAL/CELSR3/CLDN18/CELSR1/IGSF9B/PCDHB4/PCDHA6/PCDHGA2/FAT1/CBLN1/PTPRS/MDGA1/PCDHB3/PCDHB7/PCDHB15/IGSF21/PCDH17/SLITRK3/FGFRL1/PALLD/GATA5/DSC3/CLDN10/PCDH8/IL1RN/PCDH10/CDH13/PTPRF/CNTN4/CDH18/SDK1/CRB2/KIRREL3/MPZL2/CDH22/ITGB1/CDH8/ROBO3/CLDN8/PCDH1/UNC5D/CLSTN2/CLDN14/ITGB2/NEXN/NTNG1/VCAM1/CADM3/CLDN19/LRFN5/RET/CDH16/ROBO1/ITGAM/CDH2/DSCAM/CLSTN1/BSG/DAB1/PTPRM/DSCAML1/SLITRK1/LGALS7B/CD…	93
GO:0048839	inner ear development	72/812	2.85E-11	2.07E-09	1.42E-09	KCNQ1/COL11A1/FGFR2/FGF10/GLI2/CELSR1/PAX2/FGFR1/ITGA8/KCNK2/POU4F3/MYO3A/TRIP11/FGF9/CALB1/DLX5/HOXA1/GLI3/LHX3/DVL1/GATA3/FGF8/PHOX2B/LIN7A/SOBP/EPHA4/PRRX1/KCNQ4/BMP4/SOX9/PAX8/ATP8A2/SPRY2/ANP32B/TFAP2A/MYO7A/ADAM10/COL2A1/NTRK3/LRIG1/GABRB2/NOTCH1/ZIC1/WNT3A/GRHL3/ABR/NEUROD1/BMPER/SHH/GJB2/GABRB3/GBX2/CYTL1/KCNK3/NEUROG1/TBX1/GABRA5/HMX3/HMX2/FAT4/DLL1/MAFB/SLC44A4/OC90/USH1C/PVALB/SIX4/ESR…	72
GO:0014706	striated muscle tissue development	121/812	3.02E-11	2.17E-09	1.49E-09	CYP26B1/CFLAR/SOX8/PAX7/ISL1/MYOM2/PKP2/COL11A1/GPC1/FGFR2/HDAC4/PITX1/SEMA3C/SIRT6/ACTN2/FGFR1/TP73/KCNK2/NOX4/TBX5/SLC9A1/TLL2/ASB2/SMAD7/KLF5/FGF9/NDRG4/PPP1R13L/MYH14/MEOX2/FGF8/PHOX2B/SOX6/MYF6/BVES/HAND1/BCL9/MEF2D/RGS4/TNNT2/TCF21/ADRA1A/TBX2/TWIST1/EGR2/EFNB2/BMP4/HIVEP3/HOXD9/HOXD10/ALDH1A2/MYOD1/GATA5/KDM6B/MYH11/MYBPC3/PDGFRA/TBX3/SIK1/DMRTA2/ACTA1/MYH15/MEGF10/GTF3C5/NOTCH1/VAX1/PAK1/…	121
GO:0003007	heart morphogenesis	89/812	3.61E-11	2.56E-09	1.76E-09	WNT16/PLXND1/ISL1/MYOM2/PKP2/COL11A1/FGFR2/SEMA3C/SIRT6/TBX5/SMAD7/NDRG4/FOXF1/PPP1R13L/GATA3/FGF8/SUFU/ZMIZ1/HAND1/TNNT2/NRP2/TBX2/TWIST1/SNAI1/BMP4/SOX9/FGFRL1/ALDH1A2/COL5A1/GATA5/MICAL2/MYBPC3/TBX3/SMAD6/LBX1/COL2A1/CCDC40/SLIT2/SFRP2/NOTCH1/TBX6/POU4F1/WNT3A/NRG1/ACTC1/DHRS3/MSX1/HEYL/SPRY1/PITX2/HAND2/NPY1R/NPY5R/TBX20/SHH/SOX17/SMAD3/AXIN2/SHOX2/ROBO1/ZFPM2/FOXC2/SOX11/ZFPM1/NKX2-5/TBX1/CL…	89
GO:0018212	peptidyl-tyrosine modification	115/812	3.88E-11	2.72E-09	1.87E-09	FGR/MATK/ISL1/CNTN1/CD44/MAP2K3/FLT4/EPHA3/TNK2/LTK/FGFR2/TNFRSF1A/FGF10/EPHA8/FGFR1/EPHA6/NOX4/PTK6/ANGPT4/HCK/FLT1/MAPK3/CSK/EHD4/SFRP1/MET/FGF8/CAMKK2/IL23A/THBS4/CBLB/EFEMP1/EPHA4/ARHGEF2/ADRA1A/FLT3/MAP2K2/KDR/TPST2/EPO/SH3BP5/PDGFRA/EGF/IGF1R/NTRK3/CBLC/EPHA2/ABL2/EPHA5/SFRP2/PDGFC/TSLP/TTBK1/EGFR/IL18/BMP6/THY1/ANGPT1/LRRK1/WNT3A/EPHB1/NRG1/ACE/ITGB2/TAL1/JAK1/PKDCC/RYK/MST1R/IL22RA2/RET/G…	115
GO:0021545	cranial nerve development	30/812	4.13E-11	2.86E-09	1.97E-09	ISL1/PAX2/POU4F3/SALL1/HOXA1/HOXA3/GLI3/PHOX2B/TCIRG1/NRP2/HOXB3/HOXB1/EGR2/NKX2-2/HOXD3/TFAP2A/POU4F1/EPHB1/PHOX2A/NAV2/HES3/NEUROG1/TBX1/NTRK1/MAFB/PLXNA4/ERBB3/SIX4/SLITRK6/TIFAB	30
GO:1903305	regulation of regulated secretory pathway	63/812	4.46E-11	3.06E-09	2.11E-09	FGR/CACNA1G/BAIAP3/SYT7/APBA2/SYT1/CAMK2A/RIMS1/DNM1L/STX1B/CACNA1I/RIMS4/CHRNA4/FOXF1/NAPA/DVL1/P2RX1/SYT10/GNAI2/CNR1/ADRA1A/GIPC1/PRKCG/SYT5/SYT6/CPLX2/NOTCH1/DRD2/DGKI/KCNB1/ABR/ITGB2/ADCY1/CACNB2/PRKCB/CPLX1/PTAFR/ITGAM/CDK5R2/RIMS2/RPH3AL/CHRM2/FES/BACE1/HYAL3/CACNA1H/GRIN3A/SYT3/LYN/SYT13/CD84/FCGR2B/CEACAM1/HMOX1/STX1A/CCR2/ADGRE2/PRAM1/SYT8/F2RL1/CD300A/CHRNA5/ADORA2B	63
GO:0060349	bone morphogenesis	50/812	4.66E-11	3.16E-09	2.18E-09	CYP26B1/FOXN3/FGFR2/FGF4/GNAS/TRIP11/SMPD3/IMPAD1/COMP/DLX5/GLI3/COL1A1/CDX1/MEF2D/TWIST1/MATN4/RUNX2/BMP4/SOX9/PAX1/TFAP2A/COL2A1/COL6A2/SFRP2/CSGALNACT1/BMP6/MMP16/SKI/LRP5/DHRS3/ALPL/MSX1/NPPC/OSR2/FREM1/VWA2/LTBP3/AXIN2/SHOX2/PHOSPHO1/NEUROG1/ANXA2/COL14A1/RIPPLY2/BMPR2/SP5/HOXA11/MSX2/IHH/TIFAB	50
GO:0018108	peptidyl-tyrosine phosphorylation	114/812	4.88E-11	3.27E-09	2.26E-09	FGR/MATK/ISL1/CNTN1/CD44/MAP2K3/FLT4/EPHA3/TNK2/LTK/FGFR2/TNFRSF1A/FGF10/EPHA8/FGFR1/EPHA6/NOX4/PTK6/ANGPT4/HCK/FLT1/MAPK3/CSK/EHD4/SFRP1/MET/FGF8/CAMKK2/IL23A/THBS4/CBLB/EFEMP1/EPHA4/ARHGEF2/ADRA1A/FLT3/MAP2K2/KDR/EPO/SH3BP5/PDGFRA/EGF/IGF1R/NTRK3/CBLC/EPHA2/ABL2/EPHA5/SFRP2/PDGFC/TSLP/TTBK1/EGFR/IL18/BMP6/THY1/ANGPT1/LRRK1/WNT3A/EPHB1/NRG1/ACE/ITGB2/TAL1/JAK1/PKDCC/RYK/MST1R/IL22RA2/RET/GREM1/G…	114
GO:0071805	potassium ion transmembrane transport	78/812	4.93E-11	3.27E-09	2.26E-09	KCNG1/KCNQ1/KCNH2/SLC9A3/KCNAB2/GAL/TRPM5/ACTN2/KCNK2/OPRK1/SLC9A1/HCN2/KCNK10/KCNA7/ATP4A/KCNT1/KCNA1/SLC12A7/KCNQ4/RGS4/KCNJ8/KCNS1/SLC12A5/WNK4/TMEM175/KCNC1/ATP1B2/KCNA6/KCNA5/DPP6/KCNC3/SNAP25/MTNR1B/SLC24A4/ANK2/SLC12A9/FXYD4/ANK3/KCNJ1/KCNMA1/KCNS2/KCNJ6/KCNB1/ATP1A1/HCN1/KCNV1/WNK2/KCNC2/NETO1/KCNK9/KCNS3/KCNK3/KCNK7/DPP10/KCNA3/SLC9A4/KCNE1/KCNA4/GALR2/LRRC55/KCNQ3/KCNJ12/KCNK12/KCNH7/KC…	78
GO:0035115	embryonic forelimb morphogenesis	23/812	5.35E-11	3.52E-09	2.42E-09	ALX4/TP63/HOXA9/TBX5/TWIST1/RECK/RUNX2/HOXD9/ALDH1A2/TBX3/TFAP2A/OSR1/RSPO2/CACNA1C/ALX3/EN1/MSX1/SHH/OSR2/SHOX2/HOXA11/MSX2/CRABP2	23
GO:0010959	regulation of metal ion transport	121/812	6.27E-11	4.08E-09	2.81E-09	HECW1/CNTN1/KCNG1/KCNQ1/KCNH2/PKP2/KCNAB2/GAL/CAMK2A/ACTN2/OPRK1/GNAO1/REM1/TESC/NOS1/FXYD3/SLC9A1/JPH4/NTSR1/NKAIN4/FGF14/CORO1A/HOMER2/GCK/P2RX1/STIM2/KCNA1/GRM6/PDE4D/STC2/FGF12/GNAI2/OPRD1/RGS4/RAMP3/KCNS1/AHNAK/WNK4/KCNC1/ATP1B2/KCNA5/DPP6/EPO/MTNR1B/DYSF/EGF/ADCYAP1/STAC2/SIK1/PSEN2/OSR1/STAC/SNCA/ANK2/CRH/CACNA1B/DRD2/TMC2/FXYD4/CACNA1C/ANK3/GPD1L/THY1/JPH3/KCNS2/SPTBN4/ATP1A1/UCN/WNK2/CAC…	121
GO:0030072	peptide hormone secretion	86/812	7.22E-11	4.64E-09	3.20E-09	CD38/NOS2/CACNA2D2/BAIAP3/NADK/TFAP2B/SYT7/ISL1/PTPRN/GAL/MAP4K4/SREBF1/AACS/LTBP4/ITPR3/CHGA/HNF4A/SMPD3/SFRP1/GCK/TCIRG1/PASK/SLC2A1/CNR1/GHSR/ITPR2/LRP1/IL1B/PAX8/VGF/KCNA5/TRPM4/ANO1/SNAP25/GRP/MTNR1B/RAC1/IL1RN/ADCYAP1/CACNA1A/ILDR2/EPHA5/CRHBP/EGFR/CRH/TCF7L2/DRD2/CACNA1C/PRKCA/PTPRN2/SLC16A1/ADCY8/TIAM1/KCNB1/LRP5/NEUROD1/NKX6-1/UCN/CARTPT/KCNC2/RAB8B/MIDN/CPLX1/IRS1/KCNS3/TRH/PRKCE/ADCY5/…	86
GO:0060538	skeletal muscle organ development	65/812	7.31E-11	4.65E-09	3.21E-09	CYP26B1/CFLAR/SOX8/PAX7/MYOM2/GPC1/HDAC4/PITX1/TLL2/ASB2/KLF5/MYH14/MEOX2/PHOX2B/MYF6/BVES/BCL9/MEF2D/TCF21/TWIST1/EGR2/HIVEP3/FGFRL1/HOXD9/HOXD10/MYOD1/STRA6/DMRTA2/ACTA1/MYH15/MEGF10/GTF3C5/NOTCH1/VAX1/WNT3A/EPHB1/SKI/EOMES/HEYL/SHH/SOX17/ANKRD2/SHOX2/VAMP5/VGLL2/FOS/BCL2/NR1D2/BASP1/SOX11/MSC/FOXL2/TBX1/WT1/P2RX2/DNER/PAX5/RYR1/NF1/DLL1/MIR1-1/ACTN3/XK/SIX4/KEL	65
GO:0061326	renal tubule development	44/812	7.50E-11	4.73E-09	3.26E-09	SOX8/TFAP2B/WWTR1/ACAT1/PAX2/SALL1/CALB1/GLI3/GATA3/FGF8/FGF1/WNT6/TCF21/BMP4/SOX9/PAX8/WNK4/HOXD11/OSR1/ADAMTS16/NOTCH1/KIF26B/HEYL/SHH/GDNF/NPNT/IRX1/IRX2/BCL2/IRX3/CTNNBIP1/WT1/PBX1/PTCH1/COL4A1/FAT4/DLL1/POU3F3/LHX1/HOXA11/SIX4/LIF/GREB1L/WNT7B	44
GO:0031960	response to corticosteroid	63/812	8.27E-11	5.11E-09	3.52E-09	CFLAR/ISL1/ABCC2/PTPRU/GSTP1/DNMT3B/ALDH3A1/COL1A1/IGFBP2/SDC1/CPN1/DUSP1/GHSR/FLT3/GPR83/CDKN1A/FOSB/MYOD1/CDO1/EPO/SSTR4/IL1RN/NTRK3/ADCYAP1/PARP1/CNGA3/SLIT2/EGFR/STAR/CRH/NOTCH1/HNMT/FOXO1/BMP6/ALPL/UCN/GJB2/AVPR1A/ABCA3/FAM107A/PTAFR/FOS/TRH/BCL2/NPAS4/FIBIN/SSTR2/SLIT3/SMYD3/EIF4EBP1/SRC/BGLAP/NEFL/PTGS2/AREG/PCK1/PDX1/CYBB/FOSL1/WNT7B/AIF1/TNF/UGT1A1	63
GO:0150063	visual system development	114/812	8.60E-11	5.26E-09	3.63E-09	WNT16/SOX8/PAX6/TFAP2B/MYOM2/LAMC3/PRDM1/FGF10/PAX2/FAT1/KDM2B/VSX1/LAMA1/FGF9/CALB1/PPP1R13L/SLC17A7/GLI3/LHX2/GATA3/PITX3/TCIRG1/TULP1/NR2E1/GRM6/GNAT1/EFEMP1/WNT6/CRYGD/OLFM3/TBX2/TWIST1/NEUROD4/BMP4/SOX9/BFSP1/BCL11B/ALDH1A2/COL5A1/RAB11FIP4/ATP8A2/RAX/MTNR1B/PDGFRA/SKIL/TFAP2A/FOXF2/MYO7A/STRA6/CYP1B1/SIX3/FBN2/KERA/NTRK3/ADAMTS18/EPHA2/DLX1/MYH15/SDK1/EGFR/VAX1/CACNA1C/POU4F2/BMP6/THY1/EPHB…	114
GO:0035137	hindlimb morphogenesis	24/812	8.71E-11	5.28E-09	3.64E-09	TFAP2B/ALX4/PITX1/TP63/FGF4/GNAS/FGF8/ZBTB16/TWIST1/BMP4/HOXD9/HOXD10/TBX3/OSR1/AFF3/RSPO2/NOTCH1/ALX3/MSX1/SHH/OSR2/PTCH1/SALL3/MSX2	24
GO:0051961	negative regulation of nervous system development	102/812	8.94E-11	5.37E-09	3.70E-09	CD38/SOX8/PAX6/ISL1/FSTL4/NGEF/MAP4K4/CRMP1/SEMA3C/MAP2/TP73/MTMR2/MT3/DLL3/STX1B/STMN2/PTPRS/HOXA2/GLI3/LHX2/PITX3/SUFU/PHOX2B/RFX4/NR2E1/DPYSL3/DGUOK/TLX2/EPHA4/TNR/ARHGEF2/LRP1/EFNB2/SOX9/IL1B/NKX2-2/LDLR/RAP1GAP2/EDNRB/SORL1/SIX3/LBX1/ASCL1/HMG20A/NTRK3/ADCYAP1/DLX1/CNTN4/PTPRG/SLIT2/NOTCH1/VAX1/TBX6/POU4F2/SPOCK1/FEZF2/THY1/WNT3A/NRG1/SKI/ISL2/LMX1A/NKX6-1/RYK/TERT/TLX3/SHH/NEUROD2/ID4/DAB1/…	102
GO:0006813	potassium ion transport	83/812	1.14E-10	6.70E-09	4.62E-09	KCNG1/KCNQ1/KCNH2/SLC9A3/KCNAB2/GAL/TRPM5/ACTN2/KCNK2/OPRK1/NOS1/FXYD3/SLC9A1/HCN2/KCNK10/KCNA7/ATP4A/GCK/KCNT1/KCNA1/SLC12A7/KCNQ4/RGS4/KCNJ8/KCNS1/SLC12A5/WNK4/TMEM175/KCNC1/ATP1B2/KCNA6/KCNA5/DPP6/KCNC3/SNAP25/MTNR1B/SLC24A4/ADCYAP1/ANK2/SLC12A9/DRD2/FXYD4/ANK3/KCNJ1/KCNMA1/KCNS2/KCNJ6/KCNB1/ATP1A1/HCN1/KCNV1/WNK2/KCNC2/NETO1/KCNK9/KCNS3/KCNK3/KCNK7/DPP10/KCNA3/SLC9A4/KCNE1/KCNA4/GALR2/LRRC55/…	83
GO:0072080	nephron tubule development	43/812	1.32E-10	7.68E-09	5.29E-09	SOX8/TFAP2B/WWTR1/ACAT1/PAX2/SALL1/CALB1/GLI3/GATA3/FGF8/FGF1/WNT6/TCF21/BMP4/SOX9/PAX8/WNK4/HOXD11/OSR1/ADAMTS16/NOTCH1/KIF26B/HEYL/SHH/GDNF/NPNT/IRX1/IRX2/BCL2/IRX3/CTNNBIP1/WT1/PBX1/PTCH1/FAT4/DLL1/POU3F3/LHX1/HOXA11/SIX4/LIF/GREB1L/WNT7B	43
GO:0035282	segmentation	45/812	1.51E-10	8.76E-09	6.03E-09	SEMA3C/PLXNA2/DLL3/FOXF1/SFRP1/HOXA2/LFNG/COBL/MEOX2/MYF6/TBX18/CDX1/NRP2/EGR2/BMP4/PAX1/TCF15/ALDH1A2/TBX3/PCDH8/PCSK6/OSR1/SFRP2/CRB2/NOTCH1/TBX6/WNT3A/SMAD3/AXIN2/ZEB2/IRX1/IRX2/FOXB1/DMRT2/HOXD8/FOXC2/BASP1/IRX3/NEUROG1/WT1/DLL1/RIPPLY2/MAFB/LHX1/TIFAB	45
GO:0030324	lung development	65/812	1.76E-10	1.01E-08	6.94E-09	FLT4/FGFR2/FGF10/SREBF1/GLI2/CELSR1/FGFR1/PGR/ADAMTS2/TBX5/LAMA1/FGF9/MAPK3/SMPD3/CRISPLD2/FOXF1/HOXA5/AGR2/GLI3/LHX3/FGF8/FGF1/TCF21/TBX4/BMP4/SOX9/ALDH1A2/PDGFRA/SPRY2/TNS3/NKX2-8/NKX2-1/STRA6/ASCL1/CCDC40/EGFR/CRH/RSPO2/NOTCH1/SIM2/PDPN/PKDCC/SPRY1/SHH/LTBP3/ZFPM2/SOX11/CCBE1/EIF4EBP1/STK40/ADAMTSL2/BMPR2/ITGA3/GRHL2/ESRP2/SPDEF/ID1/LIF/FOXA1/FOXJ1/CHI3L1/ABCA12/SLC7A11/WNT7B/TNF	65
GO:0046883	regulation of hormone secretion	88/812	1.79E-10	1.02E-08	7.01E-09	CD38/TAC1/NOS2/CACNA2D2/BAIAP3/NADK/TFAP2B/SYT7/ISL1/GAL/MAP4K4/SREBF1/FGFR1/AACS/OPRK1/GNAS/RAB11FIP3/ITPR3/CHGA/HNF4A/SFRP1/GCK/TCIRG1/POMC/PASK/SLC2A1/CNR1/GHSR/ITPR2/LRP1/IL1B/PAX8/KCNA5/TRPM4/ANO1/SNAP25/GRP/MTNR1B/RAC1/ADCYAP1/CACNA1A/EPHA5/CRHBP/EGFR/CRH/TCF7L2/DRD2/CACNA1C/BMP6/PRKCA/SLC16A1/ADCY8/TIAM1/KCNB1/LRP5/NEUROD1/NKX6-1/UCN/CARTPT/KCNC2/RAB8B/GALR1/MIDN/IRS1/KCNS3/TRH/PRKCE/ADCY5…	88
GO:0046578	regulation of Ras protein signal transduction	82/812	1.82E-10	1.02E-08	7.04E-09	TRIO/PREX2/RASGRF1/PSD/NGEF/FGF10/MAP4K4/ARHGEF10L/ARHGEF1/ARHGEF7/ARHGEF10/ARHGEF18/RASIP1/MET/RAPGEF1/ARHGEF17/KCTD10/RASAL1/RASGRF2/ARHGEF2/TRIM67/MAPKAP1/ADRA1A/STAMBP/MCF2L/EPO/ARHGEF16/VAV3/NGF/ARHGEF4/SPRY2/RAC1/MMD2/PLCE1/ARHGEF19/ABL2/IQSEC1/RASA1/TIAM2/NOTCH1/ITGB1/EPS8/FARP1/OBSCN/FGD5/FLCN/PSD3/TIAM1/NRG1/DGKI/AUTS2/ABR/VAV2/SQSTM1/SPRY1/FBP1/ROBO1/PLEKHG5/HRAS/GRB2/SPATA13/RASA3/PLEK…	82
GO:0002064	epithelial cell development	74/812	2.05E-10	1.13E-08	7.79E-09	SOX8/PAX6/COL23A1/PRDM1/TNFRSF1A/TP63/FGFR1/PGR/FAT1/ESR1/HNF4A/KLF5/PTPRS/MET/HOXA5/RAPGEF1/NKX3-2/EXPH5/PDE4D/HRH2/SDC1/TJP2/CDKN1A/BMP4/SOX9/IL1B/NKX2-2/BFSP1/BCL11B/PODXL/PALLD/DMRT1/MYO7A/SIX3/SHROOM3/FRMD6/EPHA2/ADAMTSL4/NOTCH1/ST14/BMP6/HYDIN/MYO1E/F11R/HOXB13/NKX6-1/ONECUT1/INSM1/SFN/FOXC2/MYADM/SLC9A4/COL18A1/CLDN5/MAGI2/NTRK1/DLL1/SOX18/NOTCH4/S1PR3/GRHL2/VSIG1/ONECUT2/SPDEF/ID1/FOXA1/F…	74
GO:0030073	insulin secretion	74/812	2.05E-10	1.13E-08	7.79E-09	CD38/NOS2/CACNA2D2/BAIAP3/NADK/TFAP2B/SYT7/ISL1/PTPRN/GAL/MAP4K4/SREBF1/AACS/ITPR3/CHGA/HNF4A/SFRP1/GCK/TCIRG1/SLC2A1/CNR1/GHSR/ITPR2/LRP1/IL1B/VGF/KCNA5/TRPM4/ANO1/SNAP25/MTNR1B/RAC1/IL1RN/ADCYAP1/CACNA1A/ILDR2/EPHA5/CRH/TCF7L2/DRD2/CACNA1C/PRKCA/PTPRN2/SLC16A1/ADCY8/TIAM1/KCNB1/LRP5/NEUROD1/NKX6-1/CARTPT/KCNC2/MIDN/CPLX1/IRS1/KCNS3/TRH/PRKCE/ADCY5/BRSK2/LEP/RIMS2/RPH3AL/MAFA/EFNA5/PLA2G6/CACNA1…	74
GO:0021517	ventral spinal cord development	28/812	2.43E-10	1.33E-08	9.16E-09	PAX6/ISL1/DMRT3/GLI2/EVX1/GLI3/LHX3/SUFU/DBX1/LHX4/NKX2-2/HOXD10/LBX1/ASCL1/MDGA2/LMO4/ISL2/NKX6-1/TBX20/SHH/PHOX2A/DAB1/OLIG3/HOXC10/SOX1/PTCH1/OLIG2/LHX1	28
GO:0090276	regulation of peptide hormone secretion	74/812	2.64E-10	1.43E-08	9.87E-09	CD38/NOS2/CACNA2D2/BAIAP3/NADK/TFAP2B/SYT7/ISL1/MAP4K4/SREBF1/AACS/ITPR3/CHGA/HNF4A/SFRP1/GCK/TCIRG1/PASK/SLC2A1/CNR1/GHSR/ITPR2/LRP1/IL1B/PAX8/KCNA5/TRPM4/ANO1/SNAP25/GRP/MTNR1B/RAC1/ADCYAP1/CACNA1A/EPHA5/CRHBP/EGFR/CRH/TCF7L2/DRD2/CACNA1C/PRKCA/SLC16A1/ADCY8/TIAM1/KCNB1/LRP5/NEUROD1/NKX6-1/UCN/CARTPT/KCNC2/RAB8B/MIDN/IRS1/KCNS3/TRH/PRKCE/ADCY5/BRSK2/LEP/RPH3AL/EFNA5/PLA2G6/CACNA1E/ARL2/RASL10B/…	74
GO:0010769	regulation of cell morphogenesis involved in differentiation	97/812	2.84E-10	1.53E-08	1.05E-08	HECW1/SARM1/PLXND1/FSTL4/NGEF/SEMA3C/PLXNA2/MAP2/CHRNA3/MT3/DNM1L/NRCAM/DPYSL2/ARHGEF7/PTPRS/CORO1C/CAPRIN2/CUX2/UST/NR2E1/PLXNA1/TLX2/EPHA4/TNR/NEUROG3/LRP1/MACF1/MAP1B/ZSWIM4/NGF/PLXNC1/RAC1/TBR1/SKIL/ITPKA/ADAM10/NTRK3/BARHL2/SLIT2/DOCK5/PAK1/POU4F2/FEZF2/THY1/TNIK/WNT3A/CHODL/TIAM1/PDPN/NKX6-1/RYK/RET/ISLR2/SHOX2/SDC2/ZEB2/ROBO1/CDH2/DSCAM/KNDC1/DAB1/BRSK2/FBXW8/BAIAP2/BDNF/GRIN1/SLITRK1/CDH4…	97
GO:0050900	leukocyte migration	143/812	2.88E-10	1.54E-08	1.06E-08	ITGAL/CCL26/CD9/SLC7A9/CD44/F7/GPC1/STK10/TBX21/ADD2/ITGA6/ANGPT2/MADCAM1/SLC16A8/LGMN/CHGA/ANGPT4/HCK/FLT1/CORO1A/MAPK3/SMPD3/SLC7A5/TNFRSF10A/PIK3R2/RARRES2/DOCK8/GATA3/COL1A1/SELPLG/IL23A/CCR6/THBS4/PDE4D/ITGA4/SDC1/CD58/NKX2-3/DUSP1/HOXA7/IL1B/CCR7/ATP1B2/TRPM4/SLC7A10/VAV3/DYSF/LRCH1/EDNRB/RAC1/IL1RN/GYPC/ADAM10/CH25H/ITGB7/SLC16A3/TNFRSF11A/ITGA9/SLIT2/DOK2/ITGB1/VEGFC/EPS8/ADAM8/THY1/ANGPT…	143
GO:0060348	bone development	76/812	3.52E-10	1.86E-08	1.28E-08	CYP26B1/FOXN3/CLDN18/FGFR2/FGF4/GNAS/TRIP11/SMPD3/XYLT1/IMPAD1/COMP/DLX5/GLI3/FGF8/COL1A1/CDX1/FOXP1/MEF2D/TWIST1/MATN4/RUNX2/BMP4/SOX9/PAX1/TTC9/TFAP2A/COL2A1/COL6A2/SFRP2/PDGFC/CSGALNACT1/FLI1/BMP6/LRRK1/MMP16/SKI/LRP5/TAL1/DHRS3/ALPL/MSX1/NPPC/PITX2/OSR2/FREM1/VWA2/FBN1/GREM1/ANKRD11/LTBP3/AXIN2/SHOX2/PHOSPHO1/LEP/SH3PXD2B/FAM20C/ZFPM1/NEUROG1/ANXA2/HOXB4/SEMA4D/COL14A1/FAT4/RYR1/SRC/RIPPLY2/B…	76
GO:0010721	negative regulation of cell development	107/812	3.55E-10	1.86E-08	1.28E-08	CD38/SOX8/PAX6/ISL1/FSTL4/NGEF/CLDN18/GAL/MAP4K4/CRMP1/SEMA3C/MAP2/TP73/MT3/DLL3/STX1B/STMN2/PTPRS/HOXA2/GLI3/LHX2/PITX3/PHOX2B/CORO1C/NR2E1/DPYSL3/DGUOK/TLX2/EPHA4/TNR/ARHGEF2/RGS4/LRP1/EFNB2/SOX9/IL1B/NKX2-2/LDLR/RAP1GAP2/EDNRB/SORL1/SIX3/LBX1/ASCL1/HMG20A/NTRK3/ADCYAP1/DLX1/CNTN4/PTPRG/SLIT2/NOTCH1/VAX1/PAK1/TBX6/POU4F2/SPOCK1/FEZF2/THY1/WNT3A/NRG1/SKI/ISL2/LMX1A/NPPC/NKX6-1/RYK/TERT/TLX3/SHH/…	107
GO:0043087	regulation of GTPase activity	138/812	4.00E-10	2.08E-08	1.44E-08	PLXND1/CCL26/EPHA3/PREX2/TBC1D22A/RASGRF1/TNK2/TBC1D1/NGEF/MAP4K4/ARHGEF10L/RASAL2/RGS11/PLXNA2/ARHGEF1/GNAO1/DNM1L/ASAP3/ITGA6/RGS17/RIN3/SEC23B/ARHGEF7/TSC2/SFRP1/ARHGEF10/RASIP1/ADAP1/DOCK8/RAPGEF1/CORO1C/RASAL1/FZD10/BVES/PLXNA1/APC2/ELMOD3/EPHA4/RGS4/ARAP3/ARHGAP9/CCR7/DOCK4/SH3BP4/ARHGEF16/TBC1D5/LLGL1/RAP1GAP2/TBC1D14/RIN2/STARD13/SBF2/VAV3/DOCK2/DOCK10/PLXNC1/LRCH1/SPRY2/GIT2/NTRK3/ADCYAP…	138
GO:0007519	skeletal muscle tissue development	61/812	4.20E-10	2.17E-08	1.49E-08	CYP26B1/CFLAR/SOX8/PAX7/MYOM2/GPC1/HDAC4/PITX1/TLL2/ASB2/KLF5/MYH14/MEOX2/PHOX2B/MYF6/BVES/BCL9/MEF2D/TCF21/TWIST1/EGR2/HIVEP3/HOXD9/HOXD10/MYOD1/DMRTA2/ACTA1/MYH15/MEGF10/GTF3C5/NOTCH1/VAX1/WNT3A/EPHB1/SKI/EOMES/HEYL/SHH/SOX17/ANKRD2/SHOX2/VAMP5/VGLL2/FOS/BCL2/NR1D2/SOX11/MSC/FOXL2/TBX1/P2RX2/DNER/PAX5/RYR1/NF1/DLL1/MIR1-1/ACTN3/XK/SIX4/KEL	61
GO:0001654	eye development	111/812	4.27E-10	2.19E-08	1.51E-08	WNT16/SOX8/PAX6/TFAP2B/MYOM2/LAMC3/PRDM1/FGF10/PAX2/FAT1/KDM2B/VSX1/LAMA1/FGF9/CALB1/PPP1R13L/SLC17A7/GLI3/LHX2/GATA3/PITX3/TCIRG1/TULP1/NR2E1/GRM6/GNAT1/EFEMP1/WNT6/CRYGD/OLFM3/TBX2/TWIST1/NEUROD4/BMP4/SOX9/BFSP1/BCL11B/ALDH1A2/COL5A1/RAB11FIP4/ATP8A2/RAX/MTNR1B/PDGFRA/SKIL/TFAP2A/FOXF2/MYO7A/STRA6/CYP1B1/SIX3/FBN2/KERA/NTRK3/ADAMTS18/EPHA2/DLX1/MYH15/SDK1/EGFR/VAX1/CACNA1C/POU4F2/BMP6/THY1/EPHB…	111
GO:0050768	negative regulation of neurogenesis	95/812	4.52E-10	2.29E-08	1.57E-08	CD38/SOX8/PAX6/ISL1/FSTL4/NGEF/MAP4K4/CRMP1/SEMA3C/MAP2/TP73/MT3/DLL3/STX1B/STMN2/PTPRS/HOXA2/GLI3/LHX2/PITX3/PHOX2B/NR2E1/DPYSL3/DGUOK/TLX2/EPHA4/TNR/ARHGEF2/LRP1/EFNB2/SOX9/IL1B/NKX2-2/LDLR/RAP1GAP2/EDNRB/SORL1/SIX3/LBX1/ASCL1/HMG20A/NTRK3/ADCYAP1/DLX1/CNTN4/PTPRG/SLIT2/NOTCH1/VAX1/TBX6/POU4F2/SPOCK1/FEZF2/THY1/WNT3A/NRG1/SKI/ISL2/LMX1A/NKX6-1/RYK/TERT/TLX3/SHH/ID4/DAB1/SOX11/IRX3/GAK/IDH2/RGMA…	95
GO:0050770	regulation of axonogenesis	67/812	4.54E-10	2.29E-08	1.57E-08	PLXND1/FSTL4/SEMA3C/PLXNA2/MAP2/MT3/NRCAM/DPYSL2/PTPRS/UST/PLXNA1/EPHA4/TNR/LRP1/MACF1/MAP1B/ZSWIM4/NGF/PLXNC1/TBR1/SKIL/NTRK3/BARHL2/SLIT2/PAK1/POU4F2/FEZF2/THY1/WNT3A/CHODL/TIAM1/NKX6-1/RYK/RET/ISLR2/SHOX2/ZEB2/ROBO1/CDH2/DSCAM/DAB1/BRSK2/BDNF/GRIN1/SLITRK1/CDH4/EFNA5/SEMA4B/MAPT/DCC/SEMA4D/SEMA4A/SIPA1L1/KIF13B/BMPR2/PLXNA4/CYFIP1/NEFL/XK/SEMA4G/MAG/APOE/CRABP2/PTPRO/EFNA1/EPHB3/KEL	67
GO:0035249	synaptic transmission, glutamatergic	42/812	5.36E-10	2.66E-08	1.84E-08	SYT1/SLC17A6/SLC17A7/NAPA/CACNG7/P2RX1/GRM6/TNR/CNR1/GRIA2/TSHZ3/GRM4/UNC13A/ADCYAP1/CACNG8/CNIH3/EGFR/DRD2/CDH8/GRM1/DGKI/SHANK1/SHANK2/UCN/GRIK3/GRIK2/GRM5/CDH2/CNIH2/GRIN1/NRXN1/PLA2G6/NPY2R/GRM7/NF1/NTRK1/CACNG3/PTGS2/CCL2/KMO/CCR2/TNF	42
GO:0030323	respiratory tube development	65/812	5.41E-10	2.66E-08	1.84E-08	FLT4/FGFR2/FGF10/SREBF1/GLI2/CELSR1/FGFR1/PGR/ADAMTS2/TBX5/LAMA1/FGF9/MAPK3/SMPD3/CRISPLD2/FOXF1/HOXA5/AGR2/GLI3/LHX3/FGF8/FGF1/TCF21/TBX4/BMP4/SOX9/ALDH1A2/PDGFRA/SPRY2/TNS3/NKX2-8/NKX2-1/STRA6/ASCL1/CCDC40/EGFR/CRH/RSPO2/NOTCH1/SIM2/PDPN/PKDCC/SPRY1/SHH/LTBP3/ZFPM2/SOX11/CCBE1/EIF4EBP1/STK40/ADAMTSL2/BMPR2/ITGA3/GRHL2/ESRP2/SPDEF/ID1/LIF/FOXA1/FOXJ1/CHI3L1/ABCA12/SLC7A11/WNT7B/TNF	65
GO:0051384	response to glucocorticoid	57/812	5.42E-10	2.66E-08	1.84E-08	CFLAR/ISL1/ABCC2/PTPRU/GSTP1/DNMT3B/ALDH3A1/IGFBP2/SDC1/CPN1/DUSP1/GHSR/FLT3/GPR83/CDKN1A/FOSB/MYOD1/CDO1/EPO/SSTR4/IL1RN/NTRK3/ADCYAP1/SLIT2/EGFR/STAR/CRH/HNMT/FOXO1/BMP6/ALPL/UCN/GJB2/AVPR1A/ABCA3/FAM107A/PTAFR/FOS/TRH/BCL2/NPAS4/FIBIN/SSTR2/SLIT3/SMYD3/EIF4EBP1/BGLAP/NEFL/PTGS2/AREG/PCK1/PDX1/FOSL1/WNT7B/AIF1/TNF/UGT1A1	57
GO:0050905	neuromuscular process	46/812	6.16E-10	3.00E-08	2.07E-08	CTNNA2/KCNAB2/POU4F3/JPH4/GRIN2D/COMP/HOXA1/DVL1/KCNA1/FGF12/TNR/TCF15/SLURP1/HOXD10/ATP8A2/MYO7A/STRA6/SLC6A3/GLRA1/DRD2/POU4F2/POU4F1/JPH3/UCHL1/ABR/GRIN2C/SHANK1/UCN/PRRT2/CAMTA1/ADCY5/IGDCC3/GRIN1/NRXN1/HOXC10/PENK/GPR88/NEUROG1/CSMD1/BACE1/HMX3/GRIN3A/NEFL/USH1C/SLITRK6/TIFAB	46
GO:0007416	synapse assembly	65/812	7.11E-10	3.44E-08	2.37E-08	PLXND1/ADD2/PCDHB4/NRCAM/CBLN1/PTPRS/DVL1/NRXN2/CUX2/MDGA1/PCDHB3/EIF4G1/PCDH17/GHSR/SLITRK3/EFNB2/MAP1B/NTRK3/LRTM1/SNCA/GABRB2/SDK1/DRD2/KIRREL3/CNTN5/POU4F1/FARP1/WNT3A/EPHB1/LHFPL4/NRG1/CLSTN2/SHANK1/SHANK2/RYK/SLITRK5/LRFN5/GABRB3/CDH2/CEL/DSCAM/CLSTN1/NPAS4/BDNF/GRIN1/SLITRK1/NRXN1/EFNA5/FLRT2/THBS2/SLIT1/MAGI2/SEMA4D/DNER/AGRN/IL1RAP/SEMA4A/DNM3/NTRK1/LRRC24/SIX4/RAB17/ADGRF1/EPHB3/SLITRK6	65
GO:0060993	kidney morphogenesis	42/812	8.06E-10	3.87E-08	2.67E-08	SOX8/WWTR1/FGF10/PAX2/SALL1/CALB1/GLI3/GATA3/FGF8/FGF1/WNT6/TCF21/BMP4/SOX9/PAX8/WNK4/HOXD11/FRAS1/OSR1/ADAMTS16/KIF26B/SHH/GDNF/NPNT/IRX1/IRX2/BCL2/BASP1/IRX3/CTNNBIP1/WT1/PBX1/PTCH1/FAT4/LHX1/HOXA11/SIX4/LIF/FOXJ1/GCNT3/GREB1L/WNT7B	42
GO:0099003	vesicle-mediated transport in synapse	74/812	9.06E-10	4.30E-08	2.96E-08	SYT7/APBA2/SNAP91/SYT1/CAMK2A/SNCB/PLD1/AMPH/RIMS1/DNM1L/SLC17A6/STX1B/RIMS4/DNAJC5/CHRNA4/SLC32A1/FGF14/SLC17A7/NAPA/DVL1/P2RX1/CNR1/PCDH17/ADRA1A/PPP3CC/GIPC1/EFNB2/PRKCG/SYT5/UNC13A/DDC/SNAP25/SYT6/STON2/SH3GL1/SNCA/CPLX2/DRD2/WNT3A/GRIP1/SYN2/DGKI/ADCY1/SLC18A2/CACNB2/PRKCB/PRRT2/CPLX1/GSG1L/CDH2/CEL/CLSTN1/BRSK2/RIMS2/GAK/NRXN1/CHRM2/BTBD9/SYN3/BACE1/MAGI2/ERC2/PRKAR1B/DNM3/ARC/GRIN3A/ITGB3/…	74
GO:0030534	adult behavior	56/812	9.10E-10	4.30E-08	2.96E-08	NRXN3/PREX2/SEZ6/DMRT3/CHRNA3/OPRK1/NTSR1/CHRNA4/HOMER2/GRIN2D/NRXN2/OPRM1/FGF12/EPHA4/OPRD1/PCDH17/HOXB8/GHSR/NPY/HOXD9/HOXD10/CHL1/SNCA/CRHBP/GLRA1/SDK1/DRD2/KLHL1/EPS8/ZIC1/UCHL1/SPTBN4/SHANK1/SHANK2/EN1/CARTPT/SLITRK5/GDNF/TRH/ALK/DAB1/CNTNAP2/LEP/GRIN1/SLITRK1/NRXN1/BTBD9/CEND1/PAX5/MAFG/INPP5F/FOXA2/SLC7A11/CHRNA5/SLITRK6/NTF4	56
GO:0042472	inner ear morphogenesis	43/812	1.02E-09	4.80E-08	3.31E-08	COL11A1/FGFR2/FGF10/GLI2/CELSR1/PAX2/FGFR1/ITGA8/POU4F3/MYO3A/FGF9/DLX5/HOXA1/DVL1/GATA3/FGF8/SOBP/PRRX1/KCNQ4/SOX9/PAX8/ATP8A2/SPRY2/TFAP2A/MYO7A/COL2A1/LRIG1/ZIC1/WNT3A/GRHL3/ABR/GBX2/NEUROG1/TBX1/HMX3/HMX2/MAFB/SLC44A4/USH1C/SIX4/OTX1/SLITRK6/TIFAB	43
GO:0090287	regulation of cellular response to growth factor stimulus	93/812	1.30E-09	6.08E-08	4.19E-08	CFLAR/CREBBP/TFAP2B/DKK3/CYFIP2/GPC1/FGF10/FGF4/FGFR1/ITGA8/MT3/LTBP4/FERMT1/SMAD7/FGF9/FLT1/ZNF423/SFRP1/GRB10/GATA3/SNX25/SMOC2/FGF1/GIPC1/PMEPA1/RUNX2/BMP4/IL1B/RASL11B/SPRY2/NKX2-1/SKIL/SORL1/SMAD6/MYOF/FBN2/PCSK6/NTRK3/PRDM16/DLX1/TMEM108/SLIT2/SFRP2/PRDM14/CRB2/NOTCH1/VEGFC/ADAMTS12/FLCN/ADAMTS3/CREB3L1/SKI/XDH/MSX1/SPRY1/BMPER/OTX2/HTRA1/FBN1/PRKCB/RBPMS2/GREM1/SMAD3/NPNT/ROBO1/ONECUT1/CHS…	93
GO:0048483	autonomic nervous system development	26/812	1.42E-09	6.57E-08	4.53E-08	SOX8/TFAP2B/TP63/GATA3/PHOX2B/TLX2/NRP2/HOXB1/EGR2/EDNRB/TFAP2A/ASCL1/VCAM1/HAND2/PHOX2A/RET/NAV2/GBX2/GDNF/INSM1/HES3/SOX11/TBX1/NF1/NTRK1/PLXNA4	26
GO:1904888	cranial skeletal system development	33/812	1.49E-09	6.83E-08	4.71E-08	FOXN3/FGFR2/TP63/FGF4/GNAS/TBX15/HOXA1/HOXA2/GLI3/PRRX1/TWIST1/RUNX2/BMP4/PDGFRA/TFAP2A/CEP55/MMP16/ALX3/FREM1/SMAD3/CHST11/SH3PXD2B/FOXC2/IRX5/FOXE1/NEUROG1/TBX1/PAX5/LHX1/GRHL2/SIX4/MSX2/TIFAB	33
GO:0021543	pallium development	62/812	1.82E-09	8.31E-08	5.73E-08	PAX6/SYNE2/NDE1/NCOA1/LHX5/LAMB1/SLC32A1/PTPRS/GLI3/LHX2/LHX6/FGF8/KCNA1/PHACTR1/NR2E1/SLC2A1/NPY/LRP1/KDM6B/BTBD3/BCAN/EMX1/NKX2-1/TBR1/TACC2/ASCL1/DMRTA2/DLX1/TMEM108/SLIT2/EPHA5/EGFR/FEZ1/KIRREL3/FEZF2/WNT3A/HTR6/IGF2BP1/LMX1A/NEUROD1/EOMES/TRAPPC9/MFSD2A/ZEB2/ROBO1/EMX2/DCLK2/CDH2/ALK/CDK5R2/ID4/DAB1/CNTNAP2/BNIP3/GRIN1/PAX5/FAT4/NF1/POU3F3/CCDC85C/NEFL/P2RY12	62
GO:0048762	mesenchymal cell differentiation	75/812	1.84E-09	8.33E-08	5.74E-08	WNT16/SOX8/ISL1/WWTR1/EPHA3/FGFR2/FGF10/SEMA3C/PAX2/FGFR1/TBX5/SMAD7/MAPK3/SFRP1/FGF8/COL1A1/PHOX2B/CORO1C/GCNT2/MAD2L2/NRP2/TCF21/TWIST1/SNAI1/BMP4/SOX9/IL1B/ALDH1A2/GATA5/EDNRB/NKX2-1/FOXF2/OSR1/SFRP2/CRB2/NOTCH1/TCF7L2/HMGA2/TIAM1/NRG1/FGF19/PDPN/MSX1/EOMES/HEYL/SPRY1/PITX2/HAND2/SHH/RET/NOLC1/GREM1/SMAD3/GBX2/GDNF/AXIN2/ZEB2/NRTN/BCL2/FOXC2/SOX11/ALX1/TBX1/SEMA4B/POFUT2/SEMA4D/SEMA4A/PDCD6/SE…	75
GO:0007215	glutamate receptor signaling pathway	43/812	2.19E-09	9.83E-08	6.78E-08	RASGRF1/ACTN2/NECAB2/HOMER2/GRIN2D/CACNG7/OPRM1/GRM6/GRIA2/GRM4/UNC13A/CACNG8/CNIH3/CRHBP/CRH/DLG2/GRIA4/GRM1/GNAQ/TIAM1/KCNB1/GRIN2C/SHANK1/SHANK2/GRIK3/GRIK2/NETO1/GRM5/GSG1L/CNIH2/GRIN1/SHISA7/SHISA6/GRM7/ARC/GRIN3A/SHISA9/GRIN2B/NEFL/CACNG3/CCL2/CCR2/SSTR1	43
GO:0099504	synaptic vesicle cycle	68/812	2.21E-09	9.83E-08	6.78E-08	SYT7/APBA2/SNAP91/SYT1/CAMK2A/SNCB/PLD1/AMPH/RIMS1/DNM1L/SLC17A6/STX1B/RIMS4/DNAJC5/CHRNA4/SLC32A1/FGF14/SLC17A7/NAPA/DVL1/P2RX1/CNR1/PCDH17/ADRA1A/PPP3CC/GIPC1/PRKCG/SYT5/UNC13A/DDC/SNAP25/SYT6/STON2/SH3GL1/SNCA/CPLX2/DRD2/WNT3A/SYN2/DGKI/ADCY1/SLC18A2/CACNB2/PRKCB/PRRT2/CPLX1/CDH2/CEL/BRSK2/RIMS2/GAK/NRXN1/CHRM2/BTBD9/SYN3/BACE1/MAGI2/ERC2/PRKAR1B/DNM3/GRIN3A/CYFIP1/P2RX7/STX1A/SYT8/RAB3B/CHRNA…	68
GO:0001649	osteoblast differentiation	76/812	2.31E-09	1.02E-07	7.04E-08	SOX8/MRC2/WWTR1/CYP24A1/FGFR2/CBFB/HDAC4/TP63/GLI2/GNAS/FGF9/SFRP1/DLX5/HOXA2/GLI3/SUFU/COL1A1/TCIRG1/MEF2D/TWIST1/SNAI1/RUNX2/BMP4/TRPM4/DHX9/GPNMB/ITGA11/SMAD6/FBN2/DHH/EPHA2/SFRP2/IGFBP3/RSPO2/NOTCH1/BMP3/BMP6/WNT3A/CREB3L1/SKI/LRP5/ALPL/NPPC/HAND2/SHH/NELL1/GREM1/SMAD3/TPM4/AXIN2/NPNT/SHOX2/ID4/SH3PXD2B/SOX11/FAM20C/CTNNBIP1/PENK/IFITM1/PTCH1/WWOX/SEMA4D/NF1/SND1/SMOC1/BMPR2/CLIC1/BGLAP/GDF10…	76
GO:0007269	neurotransmitter secretion	62/812	2.39E-09	1.04E-07	7.18E-08	BAIAP3/SYT7/APBA2/SYT1/CHAT/CAMK2A/RIMS1/CHRNA3/DNM1L/RPH3A/STX1B/RIMS4/DNAJC5/HRH3/CHRNA4/SLC32A1/NAPA/DVL1/P2RX1/NRXN2/LIN7A/SLC5A7/CNR1/ADRA1A/GIPC1/GRM4/PRKCG/GAD1/SYT5/UNC13A/SNAP25/SYT6/GAD2/PPFIA4/SNCA/CPLX2/CACNA1B/DRD2/PTPRN2/SYN2/DGKI/ADCY1/SLC18A2/CACNB2/PRKCB/PRRT2/CPLX1/RIMS2/NRXN1/CHRM2/SYN3/BACE1/ERC2/SLC18A3/NF1/GRIN3A/P2RX7/STX1A/KMO/SYT8/CHRNA5/ADORA2B	62
GO:0099643	signal release from synapse	62/812	2.39E-09	1.04E-07	7.18E-08	BAIAP3/SYT7/APBA2/SYT1/CHAT/CAMK2A/RIMS1/CHRNA3/DNM1L/RPH3A/STX1B/RIMS4/DNAJC5/HRH3/CHRNA4/SLC32A1/NAPA/DVL1/P2RX1/NRXN2/LIN7A/SLC5A7/CNR1/ADRA1A/GIPC1/GRM4/PRKCG/GAD1/SYT5/UNC13A/SNAP25/SYT6/GAD2/PPFIA4/SNCA/CPLX2/CACNA1B/DRD2/PTPRN2/SYN2/DGKI/ADCY1/SLC18A2/CACNB2/PRKCB/PRRT2/CPLX1/RIMS2/NRXN1/CHRM2/SYN3/BACE1/ERC2/SLC18A3/NF1/GRIN3A/P2RX7/STX1A/KMO/SYT8/CHRNA5/ADORA2B	62
GO:1904062	regulation of cation transmembrane transport	104/812	2.50E-09	1.08E-07	7.47E-08	HECW1/KCNG1/KCNQ1/KCNH2/RASGRF1/KCNAB2/GAL/ACTN2/OPRK1/REM1/TESC/NOS1/FXYD3/SLC9A1/JPH4/MMP9/NTSR1/FGF14/CORO1A/CACNG7/STIM2/TCIRG1/KCNA1/OPRM1/PDE4D/FGF12/RGS4/GRIA2/RAMP3/TWIST1/KCNS1/AHNAK/WNK4/KCNC1/ATP1B2/DPP6/EPO/MTNR1B/DYSF/STAC2/CACNG8/CNIH3/PSEN2/OSR1/STAC/SNCA/ANK2/CRHBP/CRH/DRD2/TMC2/FXYD4/DLG2/CACNA1C/ANK3/GRIA4/GPD1L/THY1/JPH3/KCNS2/SHANK1/SHANK2/WNK2/CACNB2/KCNC2/NETO1/STIM1/GSG1L/S…	104
GO:0048645	animal organ formation	32/812	2.63E-09	1.13E-07	7.80E-08	ISL1/FGFR2/FGF10/TP63/GLI2/PAX2/FGFR1/TBX5/MAPK3/HOXA3/GLI3/FGF8/NKX3-2/FGF1/BMP4/PAX8/GATA5/TBR1/NOTCH1/WNT3A/SPRY1/HAND2/SHH/SOX17/GDNF/AXIN2/ROBO1/WT1/HOXA11/HOXC11/FOXH1/NTF4	32
GO:0048546	digestive tract morphogenesis	27/812	2.90E-09	1.24E-07	8.53E-08	FGFR2/FGF10/TP63/GLI2/FOXF1/SFRP1/AGR2/GLI3/TCF21/NKX2-3/BMP4/HOXD13/PDGFRA/STRA6/SFRP2/EGFR/NOTCH1/SHH/SOX17/RBPMS2/SMAD3/SHOX2/BCL2/SOX11/OVOL2/IHH/EPHB3	27
GO:0003205	cardiac chamber development	62/812	3.11E-09	1.32E-07	9.10E-08	PLXND1/ISL1/PKP2/PRDM1/COL11A1/FGFR2/SEMA3C/KCNK2/TBX5/TRIP11/SMAD7/FOXF1/SALL1/PPP1R13L/GATA3/FGF8/SUFU/HAND1/TNNT2/NRP2/TBX2/BMP4/PAX8/FGFRL1/MYBPC3/TBX3/SMAD6/STRA6/LMO4/SLIT2/ANK2/SFRP2/NOTCH1/TBX6/POU4F1/NRG1/DHRS3/HEYL/HAND2/NPY5R/TBX20/SHOX2/ROBO1/ZFPM2/FOXC2/SOX11/DAND5/ZFPM1/NKX2-5/TBX1/SLIT3/NPY2R/RXRA/MYH6/RYR2/MIR1-1/BMPR2/GRHL2/MSX2/OVOL2/GREB1L/FOXH1	62
GO:0003231	cardiac ventricle development	32/812	3.55E-09	1.49E-07	1.02E-07	ISL1/PKP2/PRDM1/COL11A1/FGFR2/SEMA3C/KCNK2/TBX5/TRIP11/SMAD7/FOXF1/SALL1/PPP1R13L/GATA3/SUFU/HAND1/TNNT2/BMP4/PAX8/FGFRL1/MYBPC3/TBX3/SMAD6/STRA6/LMO4/SLIT2/SFRP2/NOTCH1/POU4F1/NRG1/HEYL/HAND2/NPY5R/TBX20/ROBO1/ZFPM2/FOXC2/SOX11/DAND5/ZFPM1/NKX2-5/SLIT3/NPY2R/RXRA/MYH6/RYR2/MIR1-1/BMPR2/GRHL2/GREB1L/FOXH1	51
GO:0031346	positive regulation of cell projection organization	113/812	3.57E-09	1.49E-07	1.02E-07	CFLAR/PLXND1/ZMYND10/CNTN1/EPHA3/CROCC/LTK/SYT1/HDAC4/FSCN1/PLXNA2/FGFR1/RIMS1/DNM1L/ITGA6/PALM/KCTD17/PLEK2/PTK6/ARHGEF7/NDRG4/STMN2/CACNG7/COBL/RAPGEF1/DVL1/CPEB3/CORO1C/CAPRIN2/CUX2/RASAL1/DPYSL3/PLXNA1/EPHA4/CNR1/TRIM67/LRP1/CCR7/MACF1/EPO/UNC13A/MAP1B/ATP8A2/NGF/PLXNC1/RAC1/SKIL/ITPKA/NTRK3/ADCYAP1/ABL2/SLIT2/LCN2/PAK1/FEZ1/EPS8/POU4F2/WNT3A/CHODL/PROM2/GRIP1/TIAM1/AUTS2/SHANK1/SHANK2/RET/RA…	113
GO:0022898	regulation of transmembrane transporter activity	86/812	3.61E-09	1.49E-07	1.03E-07	HECW1/KCNG1/RASGRF1/GAL/ACTN2/REM1/TESC/NOS1/FXYD3/SLC9A1/JPH4/MMP9/NTSR1/FGF14/CACNG7/STIM2/KCNA1/OPRM1/PDE4D/FGF12/GRIA2/TWIST1/KCNS1/AHNAK/WNK4/KCNC1/ATP1B2/EPO/MTNR1B/DYSF/STAC2/CACNG8/CNIH3/OSR1/STAC/SNCA/ANK2/CRHBP/CRH/DRD2/FXYD4/DLG2/ANK3/GRIA4/GPD1L/JPH3/KCNS2/SHANK1/SHANK2/WNK2/CACNB2/KCNC2/NETO1/STIM1/GRM5/GSG1L/PTAFR/SLN/PRKCE/BCL2/CNIH2/GRIN1/KCNE1/GALR2/LRRC55/PLA2G6/PDE4B/SHISA7/SHI…	86
GO:0098693	regulation of synaptic vesicle cycle	46/812	3.68E-09	1.51E-07	1.04E-07	APBA2/SYT1/CAMK2A/PLD1/RIMS1/DNM1L/STX1B/RIMS4/DNAJC5/CHRNA4/FGF14/SLC17A7/NAPA/DVL1/P2RX1/CNR1/PCDH17/ADRA1A/PPP3CC/GIPC1/PRKCG/SH3GL1/SNCA/CPLX2/DRD2/DGKI/ADCY1/CACNB2/PRKCB/CPLX1/CDH2/BRSK2/RIMS2/NRXN1/CHRM2/BTBD9/BACE1/MAGI2/PRKAR1B/DNM3/GRIN3A/CYFIP1/STX1A/RAB3B/CHRNA5/ADORA2B	46
GO:0007612	learning	55/812	3.71E-09	1.51E-07	1.04E-07	TAC1/NRXN3/VDAC3/OPRK1/JPH4/LGMN/NTSR1/NDRG4/NPTX2/NRXN2/HRH2/TNR/SLC8A2/SLC12A5/ATXN1/C1QL1/SNAP25/TBR1/PAK6/STRA6/ADCY3/CRH/DRD2/ITGB1/JPH3/SORCS3/SLC6A1/DGKI/SHANK1/SHANK2/EN1/UCN/NETO1/GRM5/RGS14/DRD5/FOS/NEUROD2/FOXB1/SYNPO/CNTNAP2/NPAS4/GRIN1/NRXN1/GPR88/CLDN5/GABRA5/CCK/HRH1/NF1/HTT/ARC/PTGS2/SLC7A11/FOSL1	55
GO:0043010	camera-type eye development	98/812	3.99E-09	1.62E-07	1.12E-07	WNT16/SOX8/PAX6/TFAP2B/MYOM2/LAMC3/FGF10/PAX2/FAT1/KDM2B/VSX1/LAMA1/CALB1/PPP1R13L/SLC17A7/GLI3/LHX2/GATA3/PITX3/TCIRG1/TULP1/NR2E1/GRM6/GNAT1/EFEMP1/WNT6/CRYGD/TBX2/TWIST1/NEUROD4/BMP4/SOX9/BFSP1/BCL11B/ALDH1A2/RAB11FIP4/ATP8A2/RAX/MTNR1B/PDGFRA/SKIL/TFAP2A/FOXF2/STRA6/CYP1B1/SIX3/FBN2/KERA/NTRK3/EPHA2/DLX1/MYH15/SDK1/EGFR/VAX1/CACNA1C/POU4F2/THY1/EPHB1/MEGF11/SKI/GRHL3/LRP5/NEUROD1/PITX2/HCN1/S…	98
GO:0050796	regulation of insulin secretion	63/812	4.17E-09	1.68E-07	1.16E-07	CD38/NOS2/CACNA2D2/BAIAP3/NADK/TFAP2B/SYT7/ISL1/MAP4K4/SREBF1/AACS/ITPR3/CHGA/HNF4A/SFRP1/GCK/TCIRG1/SLC2A1/CNR1/GHSR/ITPR2/LRP1/IL1B/KCNA5/TRPM4/ANO1/SNAP25/MTNR1B/RAC1/CACNA1A/EPHA5/CRH/TCF7L2/DRD2/CACNA1C/PRKCA/SLC16A1/ADCY8/TIAM1/KCNB1/LRP5/NEUROD1/NKX6-1/CARTPT/KCNC2/MIDN/IRS1/KCNS3/TRH/PRKCE/ADCY5/BRSK2/LEP/RPH3AL/EFNA5/PLA2G6/CACNA1E/ARL2/STX1A/FOXA2/PDX1/FAM3D/TNF	63
GO:0072511	divalent inorganic cation transport	136/812	4.22E-09	1.69E-07	1.16E-07	CACNA1G/CACNA2D2/SLC11A1/ABCC2/TRPC7/CAMK2A/TRPM5/MT3/GNAO1/DNM1L/REM1/NOS1/SLC9A1/JPH4/ITPR3/CACNA1I/NTSR1/CHRNA4/FGF14/CORO1A/HOMER2/TRPA1/TUSC3/GRIN2D/CACNG7/GCK/P2RX1/STIM2/PANX1/OPRM1/GRM6/PDE4D/STC2/GNAI2/SLC30A3/OPRD1/RGS4/SLC8A2/ADRA1A/RAMP3/ITPR2/AHNAK/CCR7/EPO/CACNG6/TRPM4/PKDREJ/SLC41A1/TCN1/DYSF/PLCB2/PLCE1/SLC40A1/EGF/SLC24A4/STAC2/CACNA1A/CACNG8/PSEN2/STAC/SNCA/ANK2/CRH/SLC39A4/CACN…	136
GO:0022612	gland morphogenesis	48/812	4.80E-09	1.91E-07	1.32E-07	CFLAR/PLXND1/PAX6/BTBD7/FGFR2/FGF10/TP63/GLI2/SEMA3C/FGFR1/PGR/ESR1/LAMA1/SFRP1/GLI3/FGF8/PLXNA1/NKX2-3/TBX2/BMP4/SOX9/HOXD13/TBX3/EPHA2/GDF7/EGFR/NOTCH1/WNT3A/HOXB13/LRP5/SHH/BCL2/ID4/PLAG1/CSF1R/NRG3/PTCH1/RXRA/BSX/SRC/SERPINB5/CEACAM1/ESRP2/AREG/MSX2/FOXA1/ELF3/TNF	48
GO:0021536	diencephalon development	35/812	4.99E-09	1.97E-07	1.36E-07	PAX6/ISL1/PITX1/FGF10/GLI2/NCOA1/SALL1/LHX3/FGF8/NRP2/BMP4/ALDH1A2/KCNC1/RAX/NKX2-1/SIX3/ADCYAP1/SLC6A3/CRH/DRD2/POU4F1/MSX1/PITX2/SHH/KCNC2/GBX2/ZEB2/GSX1/OTP/FOXB1/CNTNAP2/NKX2-6/OLIG2/OTX1/SOX3	35
GO:0035116	embryonic hindlimb morphogenesis	19/812	5.31E-09	2.08E-07	1.43E-07	ALX4/PITX1/TP63/FGF4/GNAS/FGF8/ZBTB16/TWIST1/BMP4/TBX3/OSR1/AFF3/RSPO2/NOTCH1/ALX3/MSX1/SHH/OSR2/MSX2	19
GO:0001505	regulation of neurotransmitter levels	47/812	5.33E-09	2.08E-07	1.43E-07	NOS2/BAIAP3/SYT7/APBA2/SYT1/RORA/CHAT/CAMK2A/NAALAD2/RIMS1/CHRNA3/HSP90AA1/DNM1L/RPH3A/NOS1/STX1B/RIMS4/DNAJC5/HRH3/NTSR1/CHRNA4/SLC32A1/SLC6A2/SLC17A7/NAPA/DVL1/P2RX1/NRXN2/CHKA/LIN7A/SLC5A7/RGS4/CNR1/ADRA1A/GIPC1/GRM4/IL1B/PRKCG/SYNGR3/GAD1/SYT5/UNC13A/SLC6A11/DDC/SNAP25/SYT6/RAC1/GAD2/CYP1B1/SLC6A3/PPFIA4/SNCA/CPLX2/SLC22A3/DPYS/CACNA1B/DRD2/HNMT/DDAH1/PTPRN2/SLC6A1/SYN2/DGKI/ITGB2/ADCY1/SLC18…	106
GO:0006816	calcium ion transport	124/812	5.36E-09	2.08E-07	1.43E-07	CACNA1G/CACNA2D2/TRPC7/CAMK2A/TRPM5/GNAO1/DNM1L/REM1/NOS1/SLC9A1/JPH4/ITPR3/CACNA1I/NTSR1/CHRNA4/FGF14/CORO1A/HOMER2/TRPA1/GRIN2D/CACNG7/GCK/P2RX1/STIM2/PANX1/OPRM1/GRM6/PDE4D/STC2/GNAI2/OPRD1/RGS4/SLC8A2/ADRA1A/RAMP3/ITPR2/AHNAK/CCR7/EPO/CACNG6/TRPM4/PKDREJ/DYSF/PLCB2/PLCE1/EGF/SLC24A4/STAC2/CACNA1A/CACNG8/PSEN2/STAC/SNCA/ANK2/CRH/CACNA1B/DRD2/TMC2/PLCH2/PLCB3/CACNA2D4/CACNA1C/THY1/JPH3/WNT3A/CA…	124
GO:0045665	negative regulation of neuron differentiation	75/812	5.67E-09	2.18E-07	1.50E-07	CD38/SOX8/PAX6/ISL1/FSTL4/NGEF/MAP4K4/CRMP1/SEMA3C/MAP2/TP73/MT3/STX1B/STMN2/PTPRS/HOXA2/GLI3/PHOX2B/NR2E1/DPYSL3/DGUOK/TLX2/EPHA4/TNR/LRP1/EFNB2/SOX9/NKX2-2/RAP1GAP2/EDNRB/SIX3/LBX1/ASCL1/HMG20A/DLX1/CNTN4/PTPRG/SLIT2/NOTCH1/TBX6/POU4F2/SPOCK1/FEZF2/THY1/WNT3A/ISL2/LMX1A/RYK/TLX3/SHH/ID4/DAB1/IRX3/GAK/RGMA/SEMA4B/CIB1/PBX1/DCC/SEMA4D/SEMA4A/DNM3/ZNF536/DLL1/INPP5F/OLIG2/SEMA4G/MAG/BCL11A/ID1/KLK…	75
GO:0070371	ERK1 and ERK2 cascade	97/812	6.00E-09	2.29E-07	1.58E-07	CFLAR/CCL26/CD44/FLT4/LMO3/FGFR2/FGF10/FGF4/GSTP1/NOX4/MT3/FLT1/MAPK3/NDRG4/NECAB2/CSK/RAPGEF1/FGF8/GCNT2/OPRM1/GNAI2/DUSP1/ADRA1A/FLT3/RAMP3/LRP1/BMP4/SOX9/IL1B/CCR7/MAP2K2/KDR/EPO/TRAF7/SSTR4/PTPN22/PDGFRA/HAVCR2/SPRY2/GPNMB/EGF/ADCYAP1/TNFRSF11A/EPHA2/PDGFC/EGFR/MFHAS1/NOTCH1/DRD2/PTPRR/ANGPT1/PRKCA/FLCN/EPHB1/TIAM1/FGF19/SPRY1/HAND2/NPY5R/BMPER/WNK2/NPNT/RGS14/HRAS/NLRP6/CSF1R/CIB1/SPRY4/PLA2…	97
GO:0070372	regulation of ERK1 and ERK2 cascade	93/812	6.01E-09	2.29E-07	1.58E-07	CFLAR/CCL26/CD44/FLT4/LMO3/FGFR2/FGF10/FGF4/GSTP1/NOX4/MT3/FLT1/MAPK3/NDRG4/NECAB2/CSK/RAPGEF1/FGF8/GCNT2/OPRM1/GNAI2/DUSP1/ADRA1A/FLT3/RAMP3/LRP1/BMP4/IL1B/CCR7/KDR/EPO/TRAF7/SSTR4/PTPN22/PDGFRA/HAVCR2/SPRY2/GPNMB/ADCYAP1/TNFRSF11A/EPHA2/PDGFC/EGFR/MFHAS1/NOTCH1/DRD2/PTPRR/ANGPT1/PRKCA/FLCN/EPHB1/TIAM1/FGF19/SPRY1/HAND2/NPY5R/BMPER/WNK2/NPNT/RGS14/HRAS/NLRP6/CSF1R/CIB1/SPRY4/PLA2G2A/SLC30A10/SRC…	93
GO:0019722	calcium-mediated signaling	73/812	7.23E-09	2.73E-07	1.88E-07	HDAC4/LAT2/NOS1/SLC9A1/JPH4/NFATC2/HOMER2/GRIN2D/CAMKK2/CCR6/PDE4D/FHL2/NR5A2/PPP3CC/CCRL2/PTGFR/CCR7/KDR/TRPM4/NFATC1/EDNRB/NR5A1/PLCE1/CDH13/ANK2/EGFR/CACNA1C/JPH3/NRG1/CXCR5/GRIN2C/TPCN2/VCAM1/CXCR1/AVPR1A/GRM5/CALML6/KSR2/NEUROD2/CAMTA1/AZU1/RCAN2/NUDT4/GRIN1/C10orf71/BHLHA15/SLC8A1/CIB1/MAPT/P2RX2/HTT/RYR2/MIR1-1/ACTN3/GRIN2B/BTK/CD22/ERBB3/PTPRC/P2RX7/JPH1/ZAP70/PLEK/CCR2/ATP1B1/CCR5/CCR1/C…	73
GO:0051480	regulation of cytosolic calcium ion concentration	47/812	7.44E-09	2.78E-07	1.92E-07	CD38/TAC1/TBXA2R/PTGER3/TRPC7/SCGN/NOS1/ESR1/JPH4/ITPR3/NTSR1/CORO1A/TRPA1/CALB1/GRIN2D/P2RX1/CCR6/PDE4D/TACR1/CNR1/ADRA1A/CCRL2/PTGFR/RAMP3/ITPR2/LRP1/CCR7/KCNA5/EPO/TRPM4/MTNR1B/PDGFRA/EDNRB/HCRTR2/PLCB2/PLCE1/ADCYAP1/CACNA1A/ABL2/SNCA/ANK2/GPR6/DRD2/PLCH2/PLCB3/CACNA1C/GRM1/THY1/JPH3/ADCY8/CXCR5/GRIN2C/TPCN2/CXCR1/CACNB2/AVPR1A/RIC3/GALR1/SMAD3/PTGDR/GRM5/ADRA1B/PRKCE/KCNK3/BCL2/C3AR1/SYNPO/AD…	106
GO:0048013	ephrin receptor signaling pathway	38/812	7.45E-09	2.78E-07	1.92E-07	EPHA3/NGEF/EPHA8/EPHA6/MMP2/EFNA2/MMP9/ARHGEF7/ACTR3/EPHA4/EFNB2/ARPC1B/VAV3/RAC1/NTRK3/EPHA2/PSEN2/EPHA5/RASA1/PAK1/EPHB1/TIAM1/VAV2/SDC2/HRAS/GRIN1/AP2A2/EPHA10/EFNA5/EPHB4/SRC/SIPA1L1/NTRK1/LYN/GRIN2B/EFNA3/EFNA1/EPHB3	38
GO:0060078	regulation of postsynaptic membrane potential	53/812	7.67E-09	2.85E-07	1.96E-07	SEZ6/RIMS1/CHRNA3/IGSF9B/MTMR2/STX1B/NTSR1/CHRNA4/FGF14/CBLN1/SLC17A7/GRIN2D/DVL1/P2RX1/GABRA4/CUX2/KCNA1/OPRM1/RGS4/ADCYAP1/SH3GL1/TMEM108/SNCA/GABRA6/GABRB2/GLRA1/DRD2/GRM1/DGKI/GRIN2C/SHANK1/SHANK2/GRIK3/GRIK2/GABRB3/NETO1/GRM5/NPAS4/BAIAP2/RIMS2/GRIN1/NRXN1/GABRG3/NPY2R/GABRA5/P2RX2/CHRNG/GRIN3A/GABBR1/GRIN2B/P2RX7/STX1A/CHRNA5	53
GO:0050803	regulation of synapse structure or activity	75/812	8.75E-09	3.23E-07	2.23E-07	CTNNA2/NGEF/DNM1L/NRCAM/SLC17A6/STX1B/CBLN1/SLC17A7/PTPRS/CAPRIN2/CUX2/MDGA1/EIF4G1/EPHA4/NRP2/GHSR/SLITRK3/PCDH8/ITPKA/ADAM10/NTRK3/LRTM1/SNCA/DRD2/CDH8/WNT3A/EPHB1/TIAM1/LHFPL4/CLSTN2/SLITRK5/LRFN5/C1QL3/CDH2/NEUROD2/CLSTN1/BAIAP2/BDNF/GRIN1/SLITRK1/NRXN1/EFNA5/FLRT2/THBS2/SLIT1/SEMA4D/SHISA7/AGRN/SHISA6/IL1RAP/SEMA4A/TUBB/SIPA1L1/DNM3/NTRK1/ARC/LRRC24/GRIN2B/CYFIP1/SRCIN1/FCGR2B/SIX4/IL10RA/RA…	75
GO:0032412	regulation of ion transmembrane transporter activity	83/812	8.80E-09	3.23E-07	2.23E-07	HECW1/KCNG1/RASGRF1/GAL/ACTN2/REM1/TESC/NOS1/FXYD3/SLC9A1/JPH4/MMP9/NTSR1/FGF14/CACNG7/STIM2/KCNA1/OPRM1/PDE4D/FGF12/GRIA2/KCNS1/AHNAK/WNK4/KCNC1/ATP1B2/EPO/MTNR1B/DYSF/STAC2/CACNG8/CNIH3/OSR1/STAC/ANK2/CRHBP/CRH/DRD2/FXYD4/DLG2/ANK3/GRIA4/GPD1L/JPH3/KCNS2/SHANK1/SHANK2/WNK2/CACNB2/KCNC2/NETO1/STIM1/GRM5/GSG1L/PTAFR/SLN/PRKCE/CNIH2/GRIN1/KCNE1/GALR2/LRRC55/PLA2G6/PDE4B/SHISA7/SHISA6/HTT/WWP2/ARC/…	83
GO:0007218	neuropeptide signaling pathway	43/812	9.26E-09	3.37E-07	2.33E-07	TAC1/NPFFR2/GAL/OPRK1/NTSR1/SORCS1/OPRM1/POMC/OPRD1/PRLHR/NPY/GPR83/PYY/SSTR4/GRP/HCRTR2/ADCYAP1/PTH2/NXPH2/GLRA1/MCHR2/SORCS3/UCN/NPY1R/NPY5R/CARTPT/GALR1/PNOC/ECEL1/RXFP4/GPR149/SSTR2/PENK/RXFP3/GALR2/SORCS2/NPY2R/QRFPR/NMB/NMS/NMU/SSTR1/GPR1	43
GO:0009953	dorsal/ventral pattern formation	39/812	9.30E-09	3.37E-07	2.33E-07	PAX6/PAX7/DMRT3/GLI2/SFRP1/HOXA2/EVX1/GLI3/LHX2/LHX3/FGF8/SUFU/DBX1/RFX4/MDFI/BMP4/NKX2-2/HOXD11/NKX2-1/LMX1B/SMAD6/SIX3/ASCL1/WNT3A/EN1/NKX6-1/TBX20/SP8/SHH/GREM1/DSCAML1/SOX1/PTCH1/TRAF3IP1/NOTO/LHX1/HOXA11/OVOL2/FOXA1	39
GO:0006865	amino acid transport	53/812	1.02E-08	3.69E-07	2.54E-07	SLC6A13/SLC7A14/SLC11A1/SLC7A9/SYT1/SLC6A15/RIMS1/SLC17A6/HRH3/NTSR1/SLC32A1/SLC7A5/OCA2/SLC17A7/SLC6A12/RGS4/SLC25A2/GIPC1/SLC7A10/SLC6A6/SLC6A11/SNAP25/LRRC8A/PPFIA4/SNCA/SLC6A1/PDPN/SLC6A20/NPY5R/SLC6A18/SLC6A5/AVPR1A/SLC38A8/SLC43A2/CPLX1/TRH/LRRC8C/LRRC8D/SLC6A19/LEP/SLC25A22/CCK/GRM7/NF1/SLC6A17/XK/P2RX7/SLC7A4/STX1A/KMO/ACE2/SLC7A11/SLC6A14	53
GO:0021522	spinal cord motor neuron differentiation	21/812	1.04E-08	3.71E-07	2.56E-07	PAX6/ISL1/GLI2/GLI3/LHX3/SUFU/LHX4/NKX2-2/HOXD10/LBX1/MDGA2/LMO4/ISL2/NKX6-1/TBX20/SHH/PHOX2A/OLIG3/HOXC10/PTCH1/OLIG2	21
GO:0048566	embryonic digestive tract development	21/812	1.04E-08	3.71E-07	2.56E-07	FGFR2/FGF10/GLI2/FGF9/FOXF1/SALL1/RARRES2/GLI3/TCF21/ALDH1A2/PDGFRA/FOXF2/STRA6/PKDCC/SHH/RBPMS2/SHOX2/SOX11/OVOL2/IHH/TNF	21
GO:0070838	divalent metal ion transport	133/812	1.06E-08	3.75E-07	2.58E-07	CACNA1G/CACNA2D2/SLC11A1/TRPC7/CAMK2A/TRPM5/MT3/GNAO1/DNM1L/REM1/NOS1/SLC9A1/JPH4/ITPR3/CACNA1I/NTSR1/CHRNA4/FGF14/CORO1A/HOMER2/TRPA1/TUSC3/GRIN2D/CACNG7/GCK/P2RX1/STIM2/PANX1/OPRM1/GRM6/PDE4D/STC2/GNAI2/SLC30A3/OPRD1/RGS4/SLC8A2/ADRA1A/RAMP3/ITPR2/AHNAK/CCR7/EPO/CACNG6/TRPM4/PKDREJ/SLC41A1/DYSF/PLCB2/PLCE1/EGF/SLC24A4/STAC2/CACNA1A/CACNG8/PSEN2/STAC/SNCA/ANK2/CRH/SLC39A4/CACNA1B/DRD2/TMC2/PLCH2…	133
GO:0016049	cell growth	134/812	1.13E-08	3.98E-07	2.74E-07	CD38/EXTL3/PRDM11/BCAR1/FSTL4/CYFIP2/SYT1/IP6K2/GAL/SEMA3C/SIRT6/MAP2/RIMS1/HSP90AA1/EPB41L3/MT3/KDM2B/LTBP4/SLC9A1/POU4F3/NRCAM/DPYSL2/HNF4A/ADNP2/SFRP1/PTPRS/CACNG7/COBL/LHX2/DVL1/KAZALD1/TMEM97/CAPRIN2/RASAL1/PLXNA1/EIF4G1/ITGA4/TNR/MAD2L2/RGS4/NRP2/SGK1/SOCS2/ADRA1A/CDKN2C/LRP1/CDKN1A/SOX9/MACF1/INO80/SH3BP4/UNC13A/SESN2/MAP1B/DCLK1/NGF/ACVR1B/EMX1/ADAM10/PLCE1/FBLN5/NTRK3/RPTOR/IGFBP4/BARHL2…	134
GO:2001257	regulation of cation channel activity	63/812	1.14E-08	3.98E-07	2.74E-07	KCNG1/RASGRF1/GAL/ACTN2/REM1/NOS1/JPH4/MMP9/NTSR1/FGF14/CACNG7/STIM2/KCNA1/OPRM1/PDE4D/FGF12/GRIA2/KCNS1/AHNAK/KCNC1/EPO/MTNR1B/DYSF/STAC2/CACNG8/CNIH3/STAC/ANK2/CRHBP/CRH/DRD2/DLG2/ANK3/GRIA4/JPH3/KCNS2/SHANK1/SHANK2/CACNB2/KCNC2/NETO1/STIM1/GSG1L/CNIH2/GRIN1/KCNE1/GALR2/LRRC55/PLA2G6/PDE4B/SHISA7/SHISA6/HTT/ARC/MIR1-1/SHISA9/GRIN2B/NEFL/CACNG3/JPH1/CCL2/CCR2/GPR35	63
GO:0048592	eye morphogenesis	55/812	1.15E-08	4.00E-07	2.75E-07	WNT16/SOX8/PAX6/TFAP2B/PRDM1/PAX2/FAT1/KDM2B/VSX1/CALB1/GLI3/PITX3/TULP1/GNAT1/EFEMP1/OLFM3/TBX2/TWIST1/BMP4/SOX9/COL5A1/ATP8A2/TFAP2A/FOXF2/MYO7A/STRA6/SIX3/FBN2/EPHA2/SDK1/THY1/EPHB1/MEGF11/SKI/LRP5/PITX2/HCN1/FBN1/PTF1A/DSCAM/BCL2/PTPRM/IRX5/SOX11/FJX1/TSKU/SOX1/FOXL2/FSCN2/NF1/DLL1/LHX1/USH1C/AQP5/IHH	55
GO:0055074	calcium ion homeostasis	131/812	1.22E-08	4.23E-07	2.91E-07	CD38/TAC1/TBXA2R/TFAP2B/PTGER3/TRPC7/SCGN/NOS1/ESR1/JPH4/ITPR3/KCTD17/NTSR1/CORO1A/TRPA1/CALB1/GRIN2D/P2RX1/STIM2/TCIRG1/CCR6/PDE4D/STC2/TACR1/SLC8A2/CNR1/ADRA1A/CCRL2/PTGFR/RAMP3/ITPR2/LRP1/GCM2/CCR7/KCNA5/EPO/TRPM4/KL/MTNR1B/PDGFRA/EDNRB/HCRTR2/PLCB2/PLCE1/SLC24A4/ADCYAP1/CACNA1A/ABL2/SNCA/ANK2/GPR6/DRD2/PLCH2/PLCB3/CACNA1C/GRM1/THY1/JPH3/ADCY8/CXCR5/GRIN2C/TPCN2/CXCR1/GRIK2/PDZD8/CACNB2/AVPR1A…	131
GO:0048608	reproductive structure development	122/812	1.29E-08	4.44E-07	3.06E-07	SOX8/MGST1/PTPRN/PRDM1/CASP8/FGFR2/FGF10/TP63/GLI2/HOXA9/PGR/NCOA1/TFAP2C/ESR1/COL9A3/BIK/FGF9/MAPK3/SALL1/SFRP1/STK3/AMH/ETV2/LFNG/GLI3/LHX3/GATA3/FGF8/MDFI/HAND1/STC2/SDC1/TCF21/LHX4/GHSR/SNAI1/BMP4/SOX9/VGF/HOXD13/PDGFRA/TBX3/NKX2-1/NR5A1/DMRT1/FOXF2/STRA6/LHCGR/DHH/ADCYAP1/ETNK2/OSR1/GDF7/SLIT2/SFRP2/EGFR/STAR/NOTCH1/GAS2/ST14/BMP6/HOXB13/LHX8/EOMES/SHH/GJB2/HTRA1/ZFPM2/BCL2/UTF1/ID4/BSG/STOX…	122
GO:0032409	regulation of transporter activity	88/812	1.30E-08	4.45E-07	3.07E-07	HECW1/KCNG1/RASGRF1/GAL/ACTN2/REM1/TESC/NOS1/FXYD3/SLC9A1/JPH4/MMP9/NTSR1/FGF14/CACNG7/STIM2/KCNA1/OPRM1/PDE4D/FGF12/SGK1/GRIA2/TWIST1/KCNS1/AHNAK/WNK4/SYNGR3/KCNC1/ATP1B2/EPO/MTNR1B/DYSF/STAC2/CACNG8/CNIH3/OSR1/STAC/SNCA/ANK2/CRHBP/CRH/DRD2/FXYD4/DLG2/ANK3/GRIA4/GPD1L/JPH3/KCNS2/SHANK1/SHANK2/WNK2/CACNB2/KCNC2/NETO1/STIM1/GRM5/GSG1L/PTAFR/SLN/PRKCE/BCL2/CNIH2/GRIN1/KCNE1/GALR2/LRRC55/PLA2G6/PDE4…	88
GO:0017157	regulation of exocytosis	72/812	1.41E-08	4.82E-07	3.32E-07	FGR/CACNA1G/BAIAP3/SYT7/APBA2/SYT1/CAMK2A/RIMS1/DNM1L/STX1B/CACNA1I/RIMS4/CHRNA4/SMPD3/FOXF1/NAPA/DVL1/P2RX1/EXPH5/SYT10/GNAI2/SDC1/CNR1/ADRA1A/GIPC1/PRKCG/SYT5/VPS4A/SYT6/SNCA/CPLX2/NOTCH1/DRD2/DGKI/KCNB1/ABR/ITGB2/ADCY1/CACNB2/RAB8B/PRKCB/CPLX1/PTAFR/ITGAM/CDK5R2/RIMS2/RPH3AL/CHRM2/FES/PLA2G6/BACE1/HYAL3/CACNA1H/GRIN3A/SYT3/LYN/SYT13/CD84/FCGR2B/CEACAM1/HMOX1/STX1A/CCR2/ADGRE2/PRAM1/SYT8/F2RL1/…	72
GO:0001709	cell fate determination	23/812	1.44E-08	4.89E-07	3.37E-07	CYP26B1/PAX6/ISL1/PAX2/HOXA2/GATA3/PRRX1/TBX2/BMP4/NKX2-2/MYOD1/LBX1/ASCL1/BARHL2/FEZF2/SOX17/DSCAML1/PTCH1/DLL1/NOTCH4/TRIM15/EBF2/NTF4	23
GO:0050807	regulation of synapse organization	72/812	1.75E-08	5.88E-07	4.05E-07	CTNNA2/NGEF/DNM1L/NRCAM/CBLN1/PTPRS/CAPRIN2/CUX2/MDGA1/EIF4G1/EPHA4/NRP2/GHSR/SLITRK3/PCDH8/ITPKA/ADAM10/NTRK3/LRTM1/SNCA/DRD2/CDH8/WNT3A/EPHB1/TIAM1/LHFPL4/CLSTN2/SLITRK5/LRFN5/C1QL3/CDH2/NEUROD2/CLSTN1/BAIAP2/BDNF/GRIN1/SLITRK1/NRXN1/EFNA5/FLRT2/THBS2/SLIT1/SEMA4D/SHISA7/AGRN/SHISA6/IL1RAP/SEMA4A/TUBB/SIPA1L1/DNM3/NTRK1/ARC/LRRC24/GRIN2B/CYFIP1/SRCIN1/FCGR2B/SIX4/IL10RA/RAB17/KLK8/APOE/LILRB2/A…	72
GO:0007613	memory	46/812	1.89E-08	6.29E-07	4.34E-07	TAC1/RASGRF1/ITGA8/KCNK2/ITPR3/KCNK10/LGMN/CALB1/SLC17A7/CPEB3/CUX2/HRH2/SLC8A2/CNR1/SGK1/ATXN1/LDLR/NGF/PAK6/DRD2/JPH3/ADCY8/SORCS3/SHANK1/LMX1A/ADCY1/NETO1/RGS14/NPAS4/BDNF/GRIN1/BTBD9/PLA2G6/NTF3/MAPT/CCK/SHISA7/HRH1/ARC/ITGA3/PTGS2/KLK8/APOE/ADGRF1/CX3CR1/NTF4	46
GO:0061458	reproductive system development	122/812	1.99E-08	6.61E-07	4.56E-07	SOX8/MGST1/PTPRN/PRDM1/CASP8/FGFR2/FGF10/TP63/GLI2/HOXA9/PGR/NCOA1/TFAP2C/ESR1/COL9A3/BIK/FGF9/MAPK3/SALL1/SFRP1/STK3/AMH/ETV2/LFNG/GLI3/LHX3/GATA3/FGF8/MDFI/HAND1/STC2/SDC1/TCF21/LHX4/GHSR/SNAI1/BMP4/SOX9/VGF/HOXD13/PDGFRA/TBX3/NKX2-1/NR5A1/DMRT1/FOXF2/STRA6/LHCGR/DHH/ADCYAP1/ETNK2/OSR1/GDF7/SLIT2/SFRP2/EGFR/STAR/NOTCH1/GAS2/ST14/BMP6/HOXB13/LHX8/EOMES/SHH/GJB2/HTRA1/ZFPM2/BCL2/UTF1/ID4/BSG/STOX…	122
GO:0007422	peripheral nervous system development	34/812	2.06E-08	6.81E-07	4.69E-07	SOX8/ISL1/RUNX3/GPC1/NEFH/ARHGEF10/NEUROG3/EGR2/HOXD9/HOXD10/NGF/EDNRB/NTRK3/POU4F1/NRG1/SKI/RUNX1/ISL2/NFASC/HAND2/GDNF/UGT8/BDNF/EGR3/NTF3/POU3F1/NF1/SCN8A/PLXNA4/ERBB3/FA2H/ONECUT2/SH3TC2/NTF4	34
GO:0048333	mesodermal cell differentiation	21/812	2.17E-08	7.13E-07	4.91E-07	FGFR2/PAX2/FGFR1/ITGA8/FOXF1/ETV2/BMP4/ITGB4/KDM6B/SFRP2/HMGA2/ITGB1/WNT3A/TAL1/SOX17/FOXC2/TRIM15/MIR150/ITGB3/HOXA11/ITGA3	21
GO:0043491	protein kinase B signaling	84/812	2.23E-08	7.28E-07	5.02E-07	F7/FGFR2/FGF10/FGF22/FGF4/PAX2/FGFR1/PPP2R5C/HSP90AA1/PHLPP1/NOX4/MT3/ESR1/FGF9/SMPD3/TSC2/MAZ/STK3/MEIS3/PIK3R2/MET/RAPGEF1/GATA3/FGF8/GAB1/GCNT2/FGF1/F3/RAMP3/SOX9/IL1B/CCR7/KDR/SESN2/PIK3C2B/KL/PDGFRA/SPRY2/RAC1/FGF5/EGF/IGF1R/PIK3R5/EPHA2/EGFR/MFHAS1/TCF7L2/DRD2/ITGB1/IL18/ADAM8/ANGPT1/FLCN/NRG1/XDH/NRG2/FGF19/MST1R/RET/IRS1/PIK3CD/PHLDA3/LEP/GRB2/TSPYL5/CIB1/FGF3/MAGI2/SRC/INPP5F/MIR34B/PDCD…	84
GO:0030278	regulation of ossification	68/812	2.30E-08	7.48E-07	5.15E-07	TAC1/FGFR2/HDAC4/TP63/GNAS/MAPK3/SFRP1/COMP/HOXA2/GLI3/SUFU/ZBTB16/TCIRG1/TWIST1/EGR2/RUNX2/BMP4/SOX9/GFRA4/TRPM4/KREMEN2/KL/TFAP2A/SMAD6/FBN2/OSR1/SFRP2/NOTCH1/BMP6/SKI/LRP5/DHRS3/PKDCC/NPPC/HAND2/OSR2/NELL1/GREM1/SMAD3/LTBP3/AXIN2/NPNT/BCL2/PHOSPHO1/SOX11/FAM20C/CTNNBIP1/SLC8A1/PBX1/IFITM1/PTCH1/SEMA4D/SMOC1/SMURF1/BMPR2/CLIC1/BGLAP/GDF10/P2RX7/AREG/MSX2/ID1/TOB1/AHSG/CCR1/RFLNA/WNT7B/TNF	68
GO:0060021	roof of mouth development	38/812	2.34E-08	7.58E-07	5.22E-07	ALX4/DLX5/MEOX2/GLI3/PRRX1/TCF21/TBX2/TWIST1/SNAI1/PDGFRA/TBX3/ANP32B/TFAP2A/FOXF2/FRAS1/COL2A1/PRDM16/OSR1/VAX1/WNT3A/SKI/DHRS3/PKDCC/MSX1/HAND2/SHH/OSR2/GABRB3/BNC2/SOX11/MSC/FOXE1/ALX1/TBX1/CLDN5/COL11A2/IRF6/EPHB3	38
GO:0019226	transmission of nerve impulse	33/812	2.38E-08	7.64E-07	5.27E-07	CACNA1G/DMRT3/NRCAM/CACNA1I/MYH14/CACNG7/P2RX1/KCNA1/FGF12/TNR/GHSR/MTNR1B/NTRK3/CACNG8/GLRA1/ANK3/SPTBN4/NFASC/CLDN19/CARTPT/GRIK2/AVPR1A/DRD5/CNTNAP2/GPR88/CACNA1H/SCN8A/CACNG3/SCN4A/MAG/OTOA/SCN11A/GPR35	33
GO:0051056	regulation of small GTPase mediated signal transduction	100/812	2.40E-08	7.68E-07	5.29E-07	TRIO/PREX2/RASGRF1/PSD/NGEF/FGF10/MAP4K4/ARHGEF10L/ARHGEF1/ARHGEF7/TSC2/ARHGEF10/ARHGEF18/RASIP1/PIK3R2/MET/RAPGEF1/ARHGEF17/KCTD10/RASAL1/RASGRF2/ARHGEF2/TRIM67/MAPKAP1/ARAP3/ADRA1A/ARHGAP9/STAMBP/MCF2L/EPO/ARHGEF16/RAP1GAP2/STARD13/VAV3/NGF/ARHGEF4/SPRY2/RAC1/MMD2/PLCE1/RHOF/ARHGEF19/ABL2/IQSEC1/SLIT2/RASA1/TIAM2/NOTCH1/ITGB1/EPS8/FARP1/OBSCN/FGD5/FLCN/PSD3/TIAM1/NRG1/DGKI/AUTS2/ABR/VAV2/SQSTM1…	100
GO:0003206	cardiac chamber morphogenesis	49/812	2.45E-08	7.81E-07	5.38E-07	ISL1/PKP2/COL11A1/FGFR2/SEMA3C/TBX5/SMAD7/FOXF1/PPP1R13L/GATA3/FGF8/HAND1/TNNT2/NRP2/TBX2/BMP4/FGFRL1/MYBPC3/TBX3/SMAD6/SLIT2/SFRP2/NOTCH1/POU4F1/NRG1/DHRS3/HEYL/HAND2/NPY5R/TBX20/SHOX2/ROBO1/ZFPM2/FOXC2/SOX11/ZFPM1/NKX2-5/TBX1/SLIT3/NPY2R/RXRA/MYH6/RYR2/MIR1-1/BMPR2/GRHL2/MSX2/OVOL2/FOXH1	49
GO:0006874	cellular calcium ion homeostasis	127/812	2.46E-08	7.81E-07	5.38E-07	CD38/TAC1/TBXA2R/PTGER3/TRPC7/SCGN/NOS1/ESR1/JPH4/ITPR3/KCTD17/NTSR1/CORO1A/TRPA1/CALB1/GRIN2D/P2RX1/STIM2/TCIRG1/CCR6/PDE4D/STC2/TACR1/SLC8A2/CNR1/ADRA1A/CCRL2/PTGFR/RAMP3/ITPR2/LRP1/GCM2/CCR7/KCNA5/EPO/TRPM4/MTNR1B/PDGFRA/EDNRB/HCRTR2/PLCB2/PLCE1/SLC24A4/ADCYAP1/CACNA1A/ABL2/SNCA/ANK2/GPR6/DRD2/PLCH2/PLCB3/CACNA1C/GRM1/THY1/JPH3/ADCY8/CXCR5/GRIN2C/TPCN2/CXCR1/GRIK2/PDZD8/CACNB2/AVPR1A/RIC3/PRKC…	127
GO:0048638	regulation of developmental growth	102/812	2.51E-08	7.92E-07	5.46E-07	CACNA2D2/FSTL4/FGFR2/SYT1/GAL/SEMA3C/FGFR1/MAP2/TP73/RIMS1/KCNK2/MT3/TBX5/NRCAM/DPYSL2/TLL2/LGMN/FGF9/SFRP1/STK3/PTPRS/CACNG7/AGR2/FGF8/RAI1/RASAL1/WWC1/STC2/TNR/RGS4/SOCS2/TBX2/GHSR/LRP1/CDKN1A/BMP4/MACF1/MYOD1/UNC13A/MAP1B/ATP8A2/NGF/NTRK3/SLC6A3/BARHL2/PLAC8/SFRP2/NOTCH1/PAK1/DRD2/POU4F2/WNT3A/SPTBN4/NPPC/NKX6-1/RYK/NPY1R/TBX20/ISLR2/ZFPM2/DSCAM/BCL2/LEP/SH3PXD2B/RIMS2/FOXC2/BDNF/BASP1/GJD4/CD…	102
GO:0003151	outflow tract morphogenesis	35/812	2.66E-08	8.33E-07	5.74E-07	PLXND1/ISL1/FGFR2/SEMA3C/FGF8/NRP2/TBX2/TWIST1/BMP4/TBX3/SMAD6/SFRP2/NOTCH1/DHRS3/HEYL/PITX2/HAND2/NPY1R/NPY5R/TBX20/SOX17/ROBO1/ZFPM2/FOXC2/SOX11/ZFPM1/NKX2-5/TBX1/CLDN5/NPY2R/RYR1/SOX18/BMPR2/MSX2/FOXH1	35
GO:0015837	amine transport	41/812	2.71E-08	8.46E-07	5.83E-07	SLC22A16/SYT7/SYT1/CHRNA3/OPRK1/CHGA/HRH3/NTSR1/CHRNA4/SYT10/RGS4/CNR1/GHSR/SYT5/DDC/SYT6/SNCA/CRH/DRD2/SLC6A1/KCNB1/UCN/NPY5R/CARTPT/SLC18A2/AVPR1A/GDNF/TRH/LEP/NPY2R/CCK/GRM7/SYT3/SYT13/P2RX7/STX1A/KMO/ACE2/SYT8/RAB3B/P2RY12	41
GO:1901214	regulation of neuron death	94/812	2.83E-08	8.79E-07	6.06E-07	SARM1/TFAP2B/TFAP2D/ISL1/CASP8/HDAC4/SNCB/MT3/KDM2B/LGMN/CHGA/DNAJC5/CORO1A/GATA3/FGF8/PITX3/EIF4G1/LRP1/STAMBP/GRM4/EFNB2/PRKCG/TRAF2/EPO/CHL1/NGF/MTNR1B/FAIM2/GPNMB/TFAP2A/SORL1/ASCL1/PARP1/DLX1/SNCA/RASA1/GABRB2/STAR/ADAM8/POU4F1/ANGPT1/WNT3A/EPHB1/KCNB1/ITGB2/CAPN2/EN1/UCN/TERT/GRIK2/EN2/GABRB3/GDNF/ITGAM/FOS/BCL2/FOXB1/CD34/TLR6/HRAS/BDNF/GRIN1/NQO1/HSF1/NTF3/GABRA5/BACE1/MAPT/DCC/SLC30A10/N…	94
GO:0007156	homophilic cell adhesion via plasma membrane adhesion molecules	59/812	2.85E-08	8.79E-07	6.06E-07	CELSR3/CELSR1/IGSF9B/PCDHB4/PCDHA6/PCDHGA2/FAT1/PCDHB3/PCDHB7/PCDHB15/IGSF21/PCDH17/PALLD/DSC3/PCDH8/PCDH10/CDH13/CNTN4/CDH18/SDK1/KIRREL3/MPZL2/CDH22/ITGB1/CDH8/ROBO3/PCDH1/CLSTN2/NEXN/CADM3/RET/CDH16/ROBO1/CDH2/DSCAM/CLSTN1/BSG/PTPRM/DSCAML1/CDH4/CADM1/PTPRT/FAT4/DCHS2/PCDHA7/PCDHA2/PCDHAC1/PCDHGB1/PCDHGA4/PCDH20/CD84/CDHR2/CDH17/CEACAM1/CEACAM6/CDHR5/CEACAM5/VSTM2L/DSG3	59
GO:0051897	positive regulation of protein kinase B signaling	61/812	2.92E-08	8.97E-07	6.18E-07	F7/FGFR2/FGF10/FGF22/FGF4/FGFR1/HSP90AA1/NOX4/ESR1/FGF9/MAZ/STK3/MEIS3/PIK3R2/MET/GATA3/FGF8/GAB1/GCNT2/FGF1/F3/RAMP3/CCR7/KL/PDGFRA/SPRY2/RAC1/FGF5/EGF/IGF1R/PIK3R5/EGFR/MFHAS1/TCF7L2/ITGB1/IL18/ADAM8/ANGPT1/NRG1/NRG2/FGF19/MST1R/RET/IRS1/PIK3CD/LEP/GRB2/TSPYL5/FGF3/SRC/ERBB3/AREG/EREG/GDF15/CHI3L1/PIK3AP1/CX3CR1/P2RY12/BTC/HCLS1/TNF	61
GO:0072088	nephron epithelium morphogenesis	34/812	3.11E-08	9.50E-07	6.55E-07	SOX8/PAX2/SALL1/GLI3/GATA3/FGF8/FGF1/WNT6/TCF21/BMP4/SOX9/PAX8/WNK4/HOXD11/OSR1/ADAMTS16/KIF26B/SHH/GDNF/NPNT/IRX1/IRX2/BCL2/IRX3/CTNNBIP1/WT1/PBX1/PTCH1/FAT4/LHX1/HOXA11/SIX4/LIF/GREB1L	34
GO:0042475	odontogenesis of dentin-containing tooth	38/812	3.37E-08	1.03E-06	7.08E-07	DMRT3/FGF10/TP63/GLI2/FGF4/GNAO1/ITGA6/SMPD3/GLI3/FGF8/TCIRG1/HAND1/WNT6/NKX2-3/RUNX2/BMP4/BCL11B/ITGB4/PDGFRA/SLC24A4/DLX1/RSPO2/FOXO1/LHX8/MSX1/HAND2/SHH/HTRA1/STIM1/ANKRD11/KLK4/BSG/FAM20C/TBX1/PERP/CSF3R/MSX2/AMTN	38
GO:0021700	developmental maturation	87/812	3.39E-08	1.03E-06	7.08E-07	SOX8/BAIAP3/POU2F2/PTPRN/SEZ6/CBFB/GAL/EPHA8/TRIP13/PAX2/FGFR1/PGR/MMP2/MAEA/NRCAM/PALM/VSX1/FERMT1/XYLT1/SLC17A7/HOXA5/LHX6/GATA3/CCR6/IGSF21/RECK/CDKN1A/RUNX2/BFSP1/ALDH1A2/EPO/UNC13A/C1QL1/MAP1B/BCAN/EDNRB/SIX3/ASCL1/SRRM4/ABHD2/RERE/TBX6/B4GALT5/HOXB13/SPTBN4/SHANK1/TAL1/NFIA/TRIM58/NPPC/NFASC/NKX6-1/RET/GREM1/CDK5R2/NEUROD2/CLSTN1/BCL2/PDE3A/PHOSPHO1/CNTNAP2/LEP/IRX5/GRIN1/FAM20C/ZBTB7A/NRXN…	87
GO:0001764	neuron migration	56/812	3.43E-08	1.03E-06	7.12E-07	PAX6/CELSR3/CTNNA2/CAMK2A/NDE1/CELSR1/FGFR1/NRCAM/LHX6/GATA3/PHOX2B/PHACTR1/MDGA1/ARHGEF2/NRP2/TWIST1/NEUROD4/FEZF1/MAP1B/DCLK1/CHL1/RAC1/NKX2-1/ASCL1/NTRK3/BARHL2/VAX1/DRD2/KIRREL3/ASTN1/SPOCK1/FEZF2/SH3RF1/UNC5D/NRG1/AUTS2/NKX6-1/APBB2/TLX3/TBX20/ULK4/SOX14/CDK5R2/DAB1/OLIG3/SOX1/FLRT2/NRG3/CCK/DCC/DNER/SCRT2/SCRT1/LHX1/ITGA3/NDNF	56
GO:0007178	transmembrane receptor protein serine/threonine kinase signaling pathway	102/812	3.47E-08	1.04E-06	7.17E-07	CREBBP/TFAP2B/ZC3H3/WWTR1/DKK3/FGF10/ITGA8/NLK/PXN/LTBP4/HNF4A/FERMT1/SMAD7/FGF9/MAPK3/ZNF423/SMPD3/SFRP1/ARHGEF18/AMH/COMP/ETV2/DLX5/FGF8/SNX25/GCNT2/SPTBN1/GIPC1/PMEPA1/RUNX2/BMP4/RASL11B/ACVR1B/NKX2-1/SKIL/DMRT1/SORL1/SMAD6/FBN2/PCSK6/PRDM16/CGN/PARP1/GDF7/DLX1/SFRP2/CRB2/NOTCH1/BTBD11/BMP3/BMP6/FLCN/GDF6/RBPMS/SKI/F11R/ZYX/MSX1/PPM1L/HPGD/TBX20/BMPER/SHH/HTRA1/FBN1/RBPMS2/GREM1/SMAD3/LTBP3/NP…	102
GO:0007204	positive regulation of cytosolic calcium ion concentration	95/812	3.76E-08	1.12E-06	7.70E-07	CD38/TAC1/TBXA2R/PTGER3/NOS1/ESR1/JPH4/ITPR3/NTSR1/CORO1A/TRPA1/GRIN2D/CCR6/PDE4D/TACR1/CNR1/ADRA1A/CCRL2/PTGFR/RAMP3/ITPR2/LRP1/CCR7/EPO/TRPM4/PDGFRA/EDNRB/PLCB2/PLCE1/ADCYAP1/CACNA1A/ABL2/SNCA/ANK2/GPR6/DRD2/PLCH2/PLCB3/CACNA1C/GRM1/THY1/JPH3/ADCY8/CXCR5/GRIN2C/TPCN2/CXCR1/CACNB2/AVPR1A/RIC3/GALR1/PTGDR/ADRA1B/PRKCE/BCL2/C3AR1/SYNPO/ADCY5/GRIN1/GALR2/SLC8A1/PLA2G6/NPY2R/RASA3/P2RX2/RYR1/HTT/NMB…	95
GO:0002062	chondrocyte differentiation	47/812	3.79E-08	1.12E-06	7.70E-07	RUNX3/COL11A1/GLI2/FGFR1/TRIP11/FGF9/SMPD3/IMPAD1/COMP/GLI3/NKX3-2/ZBTB16/SOX6/EFEMP1/MEF2D/MATN4/RUNX2/BMP4/SOX9/COL2A1/COL6A2/OSR1/SFRP2/HMGA2/ADAMTS12/BMP6/GDF6/ACAN/PKDCC/NPPC/OSR2/VWA2/GREM1/SMAD3/LTBP3/AXIN2/SHOX2/CYTL1/CHST11/ANXA2/COL14A1/BMPR2/HOXA11/SCIN/MSX2/IHH/RFLNA	47
GO:0072503	cellular divalent inorganic cation homeostasis	134/812	3.80E-08	1.12E-06	7.70E-07	CD38/TAC1/TBXA2R/SLC11A1/PTGER3/TRPC7/SCGN/MT3/NOS1/ESR1/JPH4/ITPR3/KCTD17/NTSR1/CORO1A/TRPA1/CALB1/GRIN2D/P2RX1/STIM2/TCIRG1/CCR6/PDE4D/STC2/SLC30A3/TACR1/SLC8A2/CNR1/ADRA1A/CCRL2/PTGFR/RAMP3/ITPR2/LRP1/GCM2/MT2A/CCR7/KCNA5/EPO/TRPM4/SLC41A1/MTNR1B/PDGFRA/EDNRB/HCRTR2/PLCB2/PLCE1/SLC24A4/ADCYAP1/CACNA1A/ABL2/SNCA/ANK2/GPR6/SLC39A4/DRD2/PLCH2/PLCB3/CACNA1C/GRM1/THY1/JPH3/ADCY8/SLC30A2/CXCR5/GRIN2…	134
GO:0042692	muscle cell differentiation	110/812	3.87E-08	1.14E-06	7.82E-07	CYP26B1/CFLAR/CACNA2D2/SPAG9/CD9/MYOM2/PRDM6/CTNNA2/FGFR2/HDAC4/RORA/FGF10/TCF3/SPEG/ACTN2/ITGA8/NOX4/TBX5/NOS1/SLC9A1/NFATC2/KLF5/FGF9/FOXF1/COMP/HDAC5/EHD1/SOX6/MYF6/BVES/SDC1/BCL9/RGS4/TNNT2/ADRA1A/TBX2/LDB3/EFNB2/BMP4/SOX9/MYOD1/TNNT3/NFATC1/KDM6B/MYH11/MYBPC3/PDGFRA/TBX3/DYSF/CAPN9/EDNRB/MYOF/SIK1/ACTA1/ANK2/MEGF10/NOTCH1/ADAM12/PAK1/ITGB1/UCHL1/WNT3A/OBSCN/SORBS2/NRG1/SKI/ACTC1/CAPN2/MSX1/S…	110
GO:0051966	regulation of synaptic transmission, glutamatergic	32/812	4.17E-08	1.21E-06	8.34E-07	SYT1/CACNG7/GRM6/TNR/CNR1/TSHZ3/GRM4/UNC13A/ADCYAP1/CACNG8/EGFR/DRD2/GRM1/DGKI/SHANK1/SHANK2/UCN/GRIK3/GRIK2/GRM5/CDH2/NRXN1/PLA2G6/NPY2R/GRM7/NTRK1/CACNG3/PTGS2/CCL2/KMO/CCR2/TNF	32
GO:0061005	cell differentiation involved in kidney development	27/812	4.57E-08	1.32E-06	9.09E-07	WWTR1/PAX2/MMP9/SALL1/GLI3/GATA3/TCF21/BMP4/PAX8/PODXL/OSR1/NOTCH1/MYO1E/SHH/GDNF/CD34/FOXC2/BASP1/WT1/PTCH1/MAGI2/FAT4/POU3F3/LHX1/LIF/FOXJ1/PTPRO	27
GO:0072189	ureter development	13/812	4.61E-08	1.33E-06	9.14E-07	SOX8/PAX2/FOXF1/GATA3/BMP4/SOX9/ALDH1A2/OSR1/NFIA/SHH/RET/EMX2/LHX1	13
GO:0048332	mesoderm morphogenesis	34/812	4.63E-08	1.33E-06	9.14E-07	FGFR2/PAX2/FGFR1/ITGA8/FOXF1/ETV2/HAND1/TLX2/SNAI1/BMP4/ITGB4/KDM6B/TBX3/EPHA2/SFRP2/CRB2/TBX6/HMGA2/ITGB1/WNT3A/TAL1/EOMES/TBX20/SOX17/SMAD3/FOXC2/POFUT2/MIR1-1/BMPR2/TRIM15/MIR150/ITGB3/HOXA11/ITGA3	34
GO:0021761	limbic system development	43/812	4.83E-08	1.38E-06	9.48E-07	FGFR2/FGFR1/NCOA1/LHX5/SLC32A1/PTPRS/GLI3/KCNA1/NR2E1/NRP2/KDM6B/BCAN/RAX/TBX3/NKX2-1/TBR1/DLX1/TMEM108/EPHA5/CRH/DRD2/FEZ1/KIRREL3/FEZF2/WNT3A/LMX1A/NEUROD1/MFSD2A/ZEB2/GSX1/EMX2/DCLK2/ALK/CDK5R2/OTP/FOXB1/ID4/DAB1/CNTNAP2/NKX2-6/NF1/NEFL/SOX3	43
GO:0021527	spinal cord association neuron differentiation	12/812	5.14E-08	1.46E-06	1.00E-06	PAX7/LHX5/LHX3/MDGA1/LBX1/ASCL1/LMO4/GDF7/WNT3A/TAL1/GSX1/LHX1	12
GO:0002791	regulation of peptide secretion	135/812	5.20E-08	1.47E-06	1.01E-06	FGR/CD38/NOS2/CACNA2D2/BAIAP3/NADK/TFAP2B/SYT7/ISL1/MAP4K4/SREBF1/AACS/DNM1L/RAB11FIP3/ITPR3/CHGA/HNF4A/FERMT1/MAPK3/SFRP1/GCK/GATA3/PANX1/TCIRG1/EXPH5/OPRM1/FOXP1/IL1A/SPTBN1/IL1R2/PASK/CD58/SLC2A1/CNR1/GHSR/TWIST1/ITPR2/LRP1/IL1B/PAX8/CCR7/TRAF2/KCNA5/TRPM4/ANO1/SNAP25/PTPN22/VTCN1/GRP/MTNR1B/HAVCR2/DHX9/RAC1/CASP1/ADCYAP1/CACNA1A/EPHA5/CRHBP/TSLP/EGFR/CRH/TCF7L2/DRD2/VEGFC/CACNA1C/FRMD4A/ADAM8…	135
GO:0043524	negative regulation of neuron apoptotic process	53/812	5.24E-08	1.47E-06	1.01E-06	TFAP2B/TFAP2D/ISL1/SNCB/MT3/KDM2B/LGMN/DNAJC5/CORO1A/FGF8/LRP1/STAMBP/PRKCG/CHL1/NGF/MTNR1B/FAIM2/DLX1/SNCA/RASA1/GABRB2/STAR/ADAM8/POU4F1/ANGPT1/EN1/TERT/GRIK2/EN2/GABRB3/GDNF/BCL2/FOXB1/HRAS/BDNF/GRIN1/NTF3/GABRA5/SLC30A10/NTRK1/NEFL/ERBB3/HMOX1/SIX4/TOX3/MAG/CCL2/APOE/VSTM2L/FOXQ1/CX3CR1/NDNF/NTF4	53
GO:0070374	positive regulation of ERK1 and ERK2 cascade	70/812	5.24E-08	1.47E-06	1.01E-06	CFLAR/CCL26/CD44/FLT4/FGFR2/FGF10/FGF4/NOX4/MT3/FLT1/MAPK3/NDRG4/NECAB2/RAPGEF1/FGF8/GCNT2/OPRM1/GNAI2/ADRA1A/FLT3/RAMP3/LRP1/BMP4/CCR7/KDR/EPO/SSTR4/PTPN22/PDGFRA/HAVCR2/SPRY2/GPNMB/ADCYAP1/TNFRSF11A/PDGFC/EGFR/MFHAS1/NOTCH1/DRD2/ANGPT1/PRKCA/FGF19/HAND2/NPY5R/BMPER/NPNT/HRAS/CSF1R/CIB1/PLA2G2A/SLC30A10/SRC/NTRK1/PTPRC/CCL2/APOE/CHI3L1/CD36/SCIMP/CCR1/F2RL1/RASGRP1/ALKAL1/TNF/CCL4/CCL15/CCL4L1/C…	70
GO:0072078	nephron tubule morphogenesis	33/812	5.43E-08	1.51E-06	1.04E-06	SOX8/PAX2/SALL1/GLI3/GATA3/FGF8/FGF1/WNT6/TCF21/BMP4/SOX9/PAX8/WNK4/HOXD11/OSR1/ADAMTS16/KIF26B/SHH/GDNF/NPNT/IRX1/IRX2/BCL2/IRX3/CTNNBIP1/WT1/PBX1/PTCH1/FAT4/LHX1/HOXA11/SIX4/GREB1L	33
GO:0048545	response to steroid hormone	109/812	5.58E-08	1.55E-06	1.07E-06	CFLAR/CD38/ISL1/ABCC2/LMO3/PTPRU/CBFB/RORA/SREBF1/TP63/PGR/GSTP1/NCOA1/DNMT3B/ESR1/HNF4A/AXIN1/SFRP1/ALDH3A1/COL1A1/NR2E1/FOXP1/IGFBP2/FHL2/SDC1/NR5A2/TCF21/CPN1/DUSP1/GHSR/FLT3/GPR83/PMEPA1/CDKN1A/CNOT1/BMP4/FOSB/NKX2-2/MYOD1/CDO1/EPO/SSTR4/IL1RN/NR5A1/ABHD2/NTRK3/ADCYAP1/ACTA1/PARP1/CNGA3/NR1I2/SLIT2/EGFR/STAR/CRH/NOTCH1/PAK1/HNMT/FOXO1/POU4F2/BMP6/GRIP1/SST/RUNX1/PRMT2/ALPL/ATP1A1/UCN/HEYL/GJB…	109
GO:0090130	tissue migration	104/812	5.72E-08	1.58E-06	1.09E-06	PLXND1/TAC1/TBXA2R/MAP2K3/FLT4/BCAR1/FGF10/MAP4K4/FGF4/FGFR1/FAP/PXN/ANGPT2/CARD10/LGMN/MMP9/ANGPT4/FERMT1/FOXF1/MET/MEOX2/GATA3/FGF8/HDAC5/CORO1C/NR2E1/CCR6/SMOC2/FGF1/FOXP1/NRP2/GIPC1/EFNB2/BMP4/SOX9/MACF1/KDR/STARD13/CYP1B1/DNAJA4/CDH13/EPHA2/ACTA1/IQSEC1/PTPRG/SLIT2/DOCK5/NOTCH1/ITGB1/VEGFC/PTPRR/ANGPT1/PRKCA/MIA3/ACTC1/ITGB2/BMPER/AMOTL1/GREM1/ZEB2/ROBO1/PRKCE/PLEKHG5/PTPRM/CLEC14A/FOXC2/EGR…	104
GO:0042733	embryonic digit morphogenesis	29/812	6.12E-08	1.68E-06	1.16E-06	CREBBP/ALX4/GLI2/SALL1/IMPAD1/GLI3/ZBTB16/ECE1/TBX2/TWIST1/BMP4/HOXD13/TBX3/OSR1/SFRP2/GNA12/NOTCH1/MSX1/HAND2/SHH/OSR2/HOXD12/CHST11/TRAF3IP1/HOXA11/GRHL2/MSX2/HOXC11/IHH	29
GO:0001704	formation of primary germ layer	46/812	6.31E-08	1.73E-06	1.19E-06	LAMA3/COL11A1/FGFR2/PAX2/FGFR1/ITGA8/MMP2/LAMB1/MMP9/FOXF1/ETV2/HAND1/ITGA4/TLX2/SNAI1/BMP4/COL5A1/ITGB4/KDM6B/COL4A2/ELF5/EPHA2/SFRP2/CRB2/TBX6/HMGA2/ITGB1/WNT3A/ETS2/ITGB2/TAL1/EOMES/TBX20/SOX17/SMAD3/FOXC2/POFUT2/LAMB3/MIR1-1/BMPR2/TRIM15/MIR150/ITGB3/LHX1/HOXA11/ITGA3	46
GO:0003015	heart process	88/812	6.52E-08	1.78E-06	1.22E-06	TAC1/CACNA1G/CACNA2D2/WWTR1/MAP2K3/KCNQ1/KCNH2/PKP2/HDAC4/SREBF1/NOX4/GNAO1/DNM1L/NOS1/FXYD3/SLC9A1/ITPR3/CHGA/SMAD7/PPP1R13L/CACNG7/BVES/PDE4D/FGF12/GNAI2/TNNI3K/RGS4/SLC8A2/TNNT2/ADRA1A/TBX2/KCNJ8/RAMP3/ITPR2/ATP1B2/KCNA5/CACNG6/TRPM4/TNNT3/MYBPC3/PDE5A/CACNG8/CORIN/ANK2/CACNA1B/DRD2/FXYD4/CACNA2D4/CACNA1C/GPD1L/CACNA2D3/ACTC1/ACE/SPTBN4/NPPC/ATP1A1/UCN/CACNB2/AVPR1A/STIM1/TACR3/ADRA1B/KCNK3/DE…	88
GO:0061333	renal tubule morphogenesis	34/812	6.84E-08	1.85E-06	1.27E-06	SOX8/PAX2/SALL1/GLI3/GATA3/FGF8/FGF1/WNT6/TCF21/BMP4/SOX9/PAX8/WNK4/HOXD11/OSR1/ADAMTS16/KIF26B/SHH/GDNF/NPNT/IRX1/IRX2/BCL2/IRX3/CTNNBIP1/WT1/PBX1/PTCH1/COL4A1/FAT4/LHX1/HOXA11/SIX4/GREB1L	34
GO:0072028	nephron morphogenesis	34/812	6.84E-08	1.85E-06	1.27E-06	SOX8/PAX2/SALL1/GLI3/GATA3/FGF8/FGF1/WNT6/TCF21/BMP4/SOX9/PAX8/WNK4/HOXD11/OSR1/ADAMTS16/KIF26B/SHH/GDNF/NPNT/IRX1/IRX2/BCL2/IRX3/CTNNBIP1/WT1/PBX1/PTCH1/FAT4/LHX1/HOXA11/SIX4/LIF/GREB1L	34
GO:0030902	hindbrain development	54/812	6.97E-08	1.87E-06	1.29E-06	CNTN1/SEZ6/CTNNA2/RORA/GLI2/PLXNA2/NCOA1/KDM2B/LHX5/CBLN1/PTPRS/HOXA2/PHOX2B/HOXB3/HOXB1/NEUROG3/EGR2/ALDH1A2/KCNC1/FAIM2/TBR1/EGF/ASCL1/RERE/PAK1/ITGB1/KLHL1/POU4F1/LMX1A/NEUROD1/EN1/SHH/EN2/PHOX2A/PTF1A/GBX2/CDK5R2/NEUROD2/BCL2/KNDC1/DAB1/HES3/GRIN1/SSTR2/CEND1/DLL1/MAFB/LHX1/FCGR2B/OTX1/SSTR1/CD3E/AIF1/TRNP1	54
GO:0014031	mesenchymal cell development	36/812	6.99E-08	1.87E-06	1.29E-06	SOX8/ISL1/SEMA3C/MAPK3/PHOX2B/CORO1C/NRP2/TWIST1/BMP4/SOX9/ALDH1A2/EDNRB/NOTCH1/NRG1/FGF19/HEYL/PITX2/HAND2/SHH/RET/NOLC1/GBX2/GDNF/ZEB2/NRTN/BCL2/FOXC2/SOX11/ALX1/TBX1/SEMA4B/SEMA4D/SEMA4A/PDCD6/SEMA4G/OVOL2	36
GO:1990138	neuron projection extension	58/812	7.40E-08	1.97E-06	1.36E-06	CYFIP2/SYT1/SEMA3C/MAP2/RIMS1/HSP90AA1/MT3/POU4F3/NRCAM/DPYSL2/PTPRS/CACNG7/LHX2/DVL1/RASAL1/PLXNA1/ITGA4/TNR/NRP2/LRP1/MACF1/UNC13A/MAP1B/DCLK1/EMX1/NTRK3/BARHL2/TMEM108/SLIT2/PAK1/ITGB1/POU4F2/WNT3A/TIAM1/AUTS2/NKX6-1/RYK/ISLR2/DSCAM/RIMS2/ULK1/CDH4/SLIT3/SEMA4B/MAPT/SLIT1/SEMA4D/SEMA4A/ITSN2/SMURF1/BMPR2/SYT3/PLXNA4/CYFIP1/SEMA4G/MAG/BCL11A/APOE	58
GO:0010092	specification of animal organ identity	20/812	7.53E-08	2.00E-06	1.38E-06	ISL1/FGFR2/FGF10/PAX2/FGFR1/GLI3/FGF8/FGF1/BMP4/PAX8/GATA5/TBR1/WNT3A/SPRY1/GDNF/AXIN2/ROBO1/HOXA11/HOXC11/FOXH1	20
GO:0051146	striated muscle cell differentiation	88/812	7.74E-08	2.05E-06	1.41E-06	CYP26B1/CFLAR/CACNA2D2/SPAG9/CD9/MYOM2/HDAC4/ACTN2/NOX4/TBX5/NOS1/SLC9A1/NFATC2/KLF5/COMP/HDAC5/EHD1/SOX6/MYF6/BVES/SDC1/BCL9/RGS4/TNNT2/ADRA1A/LDB3/EFNB2/BMP4/MYOD1/TNNT3/KDM6B/MYH11/MYBPC3/PDGFRA/TBX3/DYSF/CAPN9/MYOF/SIK1/ACTA1/NOTCH1/ADAM12/PAK1/ITGB1/UCHL1/WNT3A/OBSCN/SORBS2/NRG1/SKI/ACTC1/CAPN2/MSX1/SHH/ANKRD2/AVPR1A/GREM1/SHOX2/CDH2/BCL2/BDNF/TRIM72/NKX2-6/BHLHA15/SLC8A1/NKX2-5/TBX1/WT1/SMY…	88
GO:0006936	muscle contraction	104/812	7.77E-08	2.05E-06	1.41E-06	CD38/CACNA1G/TBXA2R/MAP2K3/MYOM2/PTGER3/KCNQ1/KCNH2/PKP2/HDAC4/ACTN2/CHRNA3/GNAO1/PXN/NOS1/SLC9A1/SORBS1/CHGA/SMAD7/PPP1R13L/MYH14/COMP/P2RX1/KCNA1/PDE4D/FGF12/TACR1/TNNI3K/TNNT2/ADRA1A/KCNJ8/GHSR/DOCK4/KCNA5/TRPM4/TNNT3/ATP8A2/MYH11/MYBPC3/DTNA/DYSF/EDNRB/MYOF/PLCE1/PDE5A/STAC2/TPM3/ACTA1/STAC/ANK2/GLRA1/DOCK5/HTR7/DRD2/CACNA1C/GPD1L/KCNMA1/ACTC1/TPCN2/ATP1A1/UCN/TBX20/ANKRD2/CACNB2/TPM4/GDNF/NP…	104
GO:0031644	regulation of nervous system process	50/812	7.93E-08	2.08E-06	1.43E-06	RIMS1/IGSF9B/OPRK1/MTMR2/SLC9A1/STX1B/NTSR1/CBLN1/GRIN2D/NPTX2/DVL1/CUX2/OPRM1/FGF12/TNR/OPRD1/RGS4/GHSR/MTNR1B/EDNRB/SH3GL1/TMEM108/GLRA1/GRM1/SHANK1/SHANK2/CARTPT/AVPR1A/NETO1/PTAFR/CNIH2/BAIAP2/RIMS2/GRIN1/NRXN1/NPY2R/CCK/SHISA7/SHISA6/SRC/SHISA9/MAG/STX1A/NMU/MYRF/KLK8/ITGAX/SCN11A/GPR35/ZNF488	50
GO:0001707	mesoderm formation	33/812	8.07E-08	2.11E-06	1.45E-06	FGFR2/PAX2/FGFR1/ITGA8/FOXF1/ETV2/HAND1/TLX2/SNAI1/BMP4/ITGB4/KDM6B/EPHA2/SFRP2/CRB2/TBX6/HMGA2/ITGB1/WNT3A/TAL1/EOMES/TBX20/SOX17/SMAD3/FOXC2/POFUT2/MIR1-1/BMPR2/TRIM15/MIR150/ITGB3/HOXA11/ITGA3	33
GO:0048588	developmental cell growth	74/812	8.49E-08	2.21E-06	1.52E-06	FSTL4/CYFIP2/SYT1/GAL/SEMA3C/SIRT6/MAP2/RIMS1/HSP90AA1/MT3/POU4F3/NRCAM/DPYSL2/PTPRS/CACNG7/COBL/LHX2/DVL1/RASAL1/PLXNA1/ITGA4/TNR/RGS4/NRP2/ADRA1A/LRP1/SOX9/MACF1/UNC13A/MAP1B/DCLK1/NGF/EMX1/NTRK3/BARHL2/TMEM108/SLIT2/PAK1/ITGB1/POU4F2/WNT3A/SORBS2/TIAM1/AUTS2/PRMT2/NKX6-1/RYK/ISLR2/ZEB2/DSCAM/RIMS2/BDNF/ULK1/CDH4/FOXL2/SLIT3/EFNA5/SEMA4B/MAPT/SLIT1/DCC/SEMA4D/SEMA4A/ITSN2/SMURF1/BMPR2/SYT3/PLXN…	74
GO:0022600	digestive system process	40/812	8.97E-08	2.32E-06	1.60E-06	TAC1/PTGER3/KCNQ1/FGF10/OPRK1/NPR3/HRH2/SGK1/TJP2/GHSR/SOX9/WNK4/LDLR/MUC4/CRH/F11R/NEUROD1/UCN/MOGAT2/CEL/LEP/SLC9A4/NEUROG1/MUC6/STK39/NPC1L1/SNX10/VSIG1/KCNN4/NMU/PLS1/CD36/GCNT3/ABCG8/TFF3/TFF2/TFF1/AQP5/MUC13/TIFAB	40
GO:0010976	positive regulation of neuron projection development	85/812	9.06E-08	2.34E-06	1.61E-06	CFLAR/PLXND1/CNTN1/EPHA3/LTK/SYT1/PLXNA2/FGFR1/RIMS1/DNM1L/ITGA6/PTK6/NDRG4/STMN2/CACNG7/COBL/RAPGEF1/DVL1/CPEB3/CAPRIN2/CUX2/RASAL1/DPYSL3/PLXNA1/EPHA4/CNR1/TRIM67/LRP1/MACF1/EPO/UNC13A/MAP1B/ATP8A2/NGF/PLXNC1/SKIL/ITPKA/NTRK3/ADCYAP1/ABL2/SLIT2/PAK1/FEZ1/POU4F2/WNT3A/CHODL/GRIP1/TIAM1/SHANK1/SHANK2/RET/ISLR2/SHOX2/ZEB2/ROBO1/ALK/DSCAM/FBXW8/BAIAP2/RIMS2/BDNF/SLITRK1/CDH4/FES/CAMK1D/EFNA5/MAPT/M…	85
GO:0051952	regulation of amine transport	38/812	9.63E-08	2.47E-06	1.70E-06	SYT7/SYT1/CHRNA3/OPRK1/CHGA/HRH3/NTSR1/CHRNA4/SYT10/RGS4/CNR1/GHSR/SYT5/SYT6/SNCA/CRH/DRD2/SLC6A1/KCNB1/UCN/NPY5R/CARTPT/AVPR1A/GDNF/TRH/LEP/NPY2R/CCK/GRM7/SYT3/SYT13/P2RX7/STX1A/KMO/ACE2/SYT8/RAB3B/P2RY12	38
GO:0042063	gliogenesis	87/812	9.69E-08	2.48E-06	1.71E-06	SOX8/PAX6/CD9/LAMC3/SYNE2/GPC1/FGF10/PAX2/TP73/GSTP1/MT3/LAMB1/MAPK3/CSK/ARHGEF10/GLI3/PITX3/PHOX2B/SOX6/NR2E1/EPHA4/LEPR/EGR2/CDKN2C/NEUROD4/LRP1/SOX9/IL1B/NKX2-2/LDLR/EMX1/NKX2-1/FGF5/ASCL1/NTRK3/ADCYAP1/DLX1/TTBK1/EGFR/NOTCH1/PRDM8/TIAM1/NRG1/SKI/B4GALT5/SLC45A3/TAL1/NKX6-1/TERT/SHH/CDH2/CDK5R2/ID4/AZU1/DAB1/BNIP3/SOX11/PENK/PLAG1/IDH2/CSF1R/ASCL2/OLIG1/POU3F1/MAPT/DNER/NF1/DLL1/GJC2/OLIG2/MIR…	87
GO:0043523	regulation of neuron apoptotic process	68/812	1.02E-07	2.61E-06	1.80E-06	TFAP2B/TFAP2D/ISL1/HDAC4/SNCB/MT3/KDM2B/LGMN/DNAJC5/CORO1A/GATA3/FGF8/PITX3/LRP1/STAMBP/GRM4/PRKCG/CHL1/NGF/MTNR1B/FAIM2/TFAP2A/ASCL1/PARP1/DLX1/SNCA/RASA1/GABRB2/STAR/ADAM8/POU4F1/ANGPT1/KCNB1/EN1/TERT/GRIK2/EN2/GABRB3/GDNF/ITGAM/BCL2/FOXB1/HRAS/BDNF/GRIN1/NQO1/NTF3/GABRA5/BACE1/SLC30A10/NF1/NTRK1/MIR200A/MIR125B1/NEFL/ERBB3/HMOX1/SIX4/TOX3/MAG/CCL2/APOE/VSTM2L/FOXQ1/CX3CR1/NDNF/NTF4/TNF	68
GO:0021872	forebrain generation of neurons	28/812	1.08E-07	2.74E-06	1.89E-06	PAX6/FGFR2/FGFR1/LHX5/SALL1/DLX5/GLI3/LHX6/FGF8/NR2E1/NRP2/BCL11B/NKX2-1/TBR1/ASCL1/DLX1/SLIT2/FEZF2/WNT3A/LHX8/UNCX/GBX2/ROBO1/DCLK2/OTP/CSF1R/SOX1/SALL3	28
GO:0016331	morphogenesis of embryonic epithelium	53/812	1.13E-07	2.84E-06	1.95E-06	WNT16/SOX8/FGFR2/FGF10/TP63/GLI2/CELSR1/PAX2/KDM2B/TSC2/SFRP1/STK3/COBL/LHX2/DVL1/GATA3/FGF8/SUFU/TBX18/HAND1/WNT6/TWIST1/BMP4/SOX9/PAX8/ALDH1A2/PCDH8/TFAP2A/SHROOM3/LMO4/OSR1/GDF7/SFRP2/ST14/VEGFC/SKI/GRHL3/SHH/RET/GDNF/ZEB2/IRX1/IRX2/SOX11/IRX3/ALX1/PTCH1/TRIM71/GRHL2/SIX4/OVOL2/PDX1/WNT7B	53
GO:0061351	neural precursor cell proliferation	53/812	1.13E-07	2.84E-06	1.95E-06	PAX6/FGFR2/RORA/NDE1/GLI2/FGFR1/KDM2B/LHX5/GLI3/LHX2/RAPGEF1/FGF8/PITX3/KCNA1/NR2E1/GNAI2/ARHGEF2/NEUROD4/KIF1A/EMX1/SIX3/EGF/ASCL1/ADCYAP1/RERE/DMRTA2/NOTCH1/VAX1/DRD2/VEGFC/FOXO1/WNT3A/EPHB1/IGF2BP1/RYK/SHH/GBX2/ZEB2/EMX2/CDH2/SHCBP1/OTP/ID4/INSM1/CEND1/NF1/GJC2/POU3F3/TRIM71/LYN/LHX1/CX3CR1/TRNP1	53
GO:0070997	neuron death	100/812	1.17E-07	2.94E-06	2.03E-06	SARM1/TFAP2B/TFAP2D/ISL1/CASP8/HDAC4/TP63/SNCB/MT3/KDM2B/SLC9A1/POU4F3/LGMN/CHGA/DNAJC5/CORO1A/GATA3/FGF8/PITX3/EIF4G1/CIT/LRP1/STAMBP/GRM4/EFNB2/PRKCG/TRAF2/EPO/CHL1/NGF/MTNR1B/FAIM2/GPNMB/TFAP2A/SORL1/ASCL1/PARP1/DLX1/SNCA/RASA1/GABRB2/STAR/DPYSL4/ADAM8/POU4F1/ANGPT1/WNT3A/EPHB1/KCNB1/ITGB2/CAPN2/EN1/UCN/TERT/GRIK2/EN2/GABRB3/GDNF/ITGAM/FOS/BCL2/FOXB1/CD34/TLR6/HRAS/BNIP3/BDNF/GRIN1/NQO1/HSF1/N…	100
GO:0021871	forebrain regionalization	16/812	1.30E-07	3.25E-06	2.24E-06	PAX6/GLI3/LHX2/FGF8/BMP4/FEZF1/EMX1/NKX2-1/SIX3/DMRTA2/FEZF2/EOMES/SHH/EMX2/LHX1/WNT7B	16
GO:0009410	response to xenobiotic stimulus	87/812	1.36E-07	3.38E-06	2.33E-06	CYP26B1/CFLAR/ABCB4/TAC1/MGST1/FMO1/DPEP1/ABCC2/F7/RORA/CYP2W1/OPRK1/GSTP1/GNAO1/DNMT3B/RGS17/PTGS1/CYP26A1/HNF4A/HOMER2/PITX3/CYP2C18/ALDH3A1/HDAC5/OPRM1/RGS4/CNR1/GHSR/FOSB/PRKCG/APOBEC3A/CDO1/EPO/CYP2E1/CYP1B1/SLC6A3/EPHX1/NR1I2/SNCA/CRHBP/SDK1/EGFR/STAR/CRH/RGS10/DRD2/HNMT/FOXO1/ACSL1/ADCY8/TIAM1/SLC6A1/SLITRK5/GJB2/SLC18A2/UGT1A6/PTAFR/DRD5/TACR3/PRKCE/ARNT2/GRIN1/FIBIN/NQO1/PENK/SLC8A1/HSF1…	87
GO:0060425	lung morphogenesis	25/812	1.44E-07	3.55E-06	2.45E-06	FGFR2/FGF10/CELSR1/LAMA1/MAPK3/FOXF1/HOXA5/FGF8/TCF21/BMP4/SOX9/SPRY2/NKX2-1/RSPO2/SPRY1/SHH/SOX11/STK40/GRHL2/ESRP2/ID1/LIF/FOXA1/WNT7B/TNF	25
GO:0046717	acid secretion	46/812	1.48E-07	3.65E-06	2.52E-06	SLC22A16/ABCB4/NOS2/ABCC2/PTGER3/KCNQ1/SYT1/RIMS1/HRH3/NTSR1/SLC17A7/HRH2/SGK1/GIPC1/IL1B/SNAP25/SSTR4/TNFRSF11A/PPFIA4/SNCA/DRD2/SLC6A1/ACE/UCN/NPY5R/AVPR1A/PROCA1/CPLX1/TRH/LEP/SLC9A4/PLA2G6/CCK/PLA2G2A/GRM7/NF1/NMB/OC90/PLA2G10/SNX10/P2RX7/STX1A/NMU/KMO/TFF2/PLA2G4F	46
GO:1903522	regulation of blood circulation	88/812	1.52E-07	3.73E-06	2.57E-06	CD38/TAC1/CACNA1G/TBXA2R/CACNA2D2/KCNQ1/KCNH2/PKP2/HDAC4/SREBF1/GNAO1/NOS1/FXYD3/SLC9A1/ITPR3/CHGA/SMAD7/CACNG7/P2RX1/BVES/PDE4D/HRH2/TNNI3K/RGS4/ECE1/SLC8A2/TNNT2/ADRA1A/TBX2/ITPR2/DOCK4/ATP1B2/KCNA5/CACNG6/TRPM4/PDE5A/CACNG8/CORIN/ANK2/EGFR/DOCK5/CACNA1B/DRD2/FXYD4/CACNA2D4/CACNA1C/GPD1L/CACNA2D3/ACE/SPTBN4/NPPC/ATP1A1/UCN/CACNB2/AVPR1A/STIM1/PTAFR/TACR3/ADRA1B/KCNK3/LEP/DES/IRX5/KCNE1/CHRM2/SL…	88
GO:0021514	ventral spinal cord interneuron differentiation	13/812	1.64E-07	4.02E-06	2.77E-06	PAX6/DMRT3/GLI2/EVX1/GLI3/LHX3/SUFU/DBX1/NKX2-2/ASCL1/LMO4/NKX6-1/SOX1	13
GO:0090132	epithelium migration	101/812	1.73E-07	4.19E-06	2.89E-06	PLXND1/TAC1/TBXA2R/MAP2K3/FLT4/BCAR1/FGF10/MAP4K4/FGF4/FGFR1/FAP/PXN/ANGPT2/CARD10/LGMN/MMP9/ANGPT4/FERMT1/MET/MEOX2/GATA3/FGF8/HDAC5/CORO1C/NR2E1/CCR6/SMOC2/FGF1/FOXP1/NRP2/GIPC1/EFNB2/BMP4/SOX9/MACF1/KDR/STARD13/CYP1B1/DNAJA4/CDH13/EPHA2/IQSEC1/PTPRG/SLIT2/DOCK5/NOTCH1/ITGB1/VEGFC/PTPRR/ANGPT1/PRKCA/MIA3/ITGB2/BMPER/AMOTL1/GREM1/ZEB2/ROBO1/PRKCE/PLEKHG5/PTPRM/CLEC14A/FOXC2/EGR3/CCBE1/CIB1/SP1/S…	101
GO:0007015	actin filament organization	111/812	1.77E-07	4.29E-06	2.96E-06	TAC1/CCL26/GAS7/MYOM2/CAPG/BCAR1/LIMCH1/CTNNA2/SPTB/ACTN1/ARHGEF10L/ADD2/FSCN1/ACTN2/CAPZB/FAT1/NOX4/ASAP3/PXN/SLC9A1/SORBS1/EFS/HCK/CORO1A/COTL1/SFRP1/ARHGEF10/MET/COBL/FSCN3/CORO1C/PHACTR1/DPYSL3/ACTR3/SPTBN1/ARHGEF2/MAD2L2/RGS4/GHSR/CIT/CCR7/BAIAP2L2/ARPC1B/KANK4/MICAL2/MYBPC3/VILL/RAC1/SPTBN5/SHROOM3/RHOF/TPM3/ACTA1/TMEFF2/ESPNL/SLIT2/IQGAP2/RASA1/FAM171A1/PAK1/EPS8/PDLIM3/SORBS2/FMN2/ACTC1/Z…	111
GO:0048017	inositol lipid-mediated signaling	61/812	1.80E-07	4.35E-06	3.00E-06	FGR/WNT16/FLT4/PREX2/LTK/PLD1/FGFR1/PPP2R5C/FLT1/MAPK3/TSC2/MAZ/PIK3R2/GATA3/GAB1/NPR3/FLT3/TWIST1/STAMBP/SOX9/KDR/EPO/PIK3C2B/NGF/PDGFRA/PLCB2/CEP55/PLCE1/IGF1R/NTRK3/PIK3R5/PDGFC/EGFR/PLCH2/PLCB3/IL18/ANGPT1/IRS1/PTAFR/PIK3CD/LEP/CSF1R/NTF3/SEMA4D/NF1/SRC/NTRK1/INPP5F/LIME1/LYN/ERBB3/CEACAM1/PLCH1/HCST/PIK3AP1/NCF1/F2RL1/RASGRP1/HCLS1/MUC5AC/TNF	61
GO:0050920	regulation of chemotaxis	69/812	1.81E-07	4.36E-06	3.00E-06	CCL26/F7/FGF10/SEMA3C/FGF4/FGFR1/GSTP1/ANGPT2/LGMN/MAPK3/MET/RARRES2/IL23A/CCR6/SMOC2/THBS4/FGF1/F3/DUSP1/EFNB2/CCR7/KDR/ZSWIM4/PDGFRA/DYSF/RAC1/TBR1/ADAM10/NTRK3/CDH13/SLIT2/NOTCH1/VEGFC/POU4F2/FEZF2/WNT3A/TIAM1/RYK/GREM1/SMAD3/ROBO1/DSCAM/C3AR1/AZU1/CAMK1D/SEMA4B/NTF3/SEMA4D/SEMA4A/ELANE/STK39/BMPR2/PLXNA4/LYN/SEMA4G/CCL2/CCR2/NCKAP1L/GPR18/PLA2G7/PTPRO/CCR1/F2RL1/P2RY12/SCG2/S100A14/AIF1/MMP28…	69
GO:0021516	dorsal spinal cord development	15/812	2.08E-07	4.98E-06	3.43E-06	PAX7/LHX5/LHX3/MDGA1/HOXB8/LBX1/ASCL1/LMO4/GDF7/WNT3A/TAL1/UNCX/GDNF/GSX1/LHX1	15
GO:0060579	ventral spinal cord interneuron fate commitment	12/812	2.16E-07	5.12E-06	3.53E-06	PAX6/DMRT3/GLI2/EVX1/GLI3/LHX3/SUFU/DBX1/NKX2-2/ASCL1/NKX6-1/SOX1	12
GO:0060581	cell fate commitment involved in pattern specification	12/812	2.16E-07	5.12E-06	3.53E-06	PAX6/DMRT3/GLI2/EVX1/GLI3/LHX3/SUFU/DBX1/NKX2-2/ASCL1/NKX6-1/SOX1	12
GO:0048015	phosphatidylinositol-mediated signaling	60/812	2.28E-07	5.38E-06	3.71E-06	FGR/WNT16/FLT4/PREX2/LTK/FGFR1/PPP2R5C/FLT1/MAPK3/TSC2/MAZ/PIK3R2/GATA3/GAB1/NPR3/FLT3/TWIST1/STAMBP/SOX9/KDR/EPO/PIK3C2B/NGF/PDGFRA/PLCB2/CEP55/PLCE1/IGF1R/NTRK3/PIK3R5/PDGFC/EGFR/PLCH2/PLCB3/IL18/ANGPT1/IRS1/PTAFR/PIK3CD/LEP/CSF1R/NTF3/SEMA4D/NF1/SRC/NTRK1/INPP5F/LIME1/LYN/ERBB3/CEACAM1/PLCH1/HCST/PIK3AP1/NCF1/F2RL1/RASGRP1/HCLS1/MUC5AC/TNF	60
GO:0001659	temperature homeostasis	58/812	2.33E-07	5.49E-06	3.79E-06	PTGER3/SIRT6/GNAS/SCD/NTSR1/ZNF423/NOVA2/GRB10/PHOX2B/LAMA4/NPR3/IL1A/LEPR/CNR1/G0S2/IL1B/SLC27A1/KDM6B/EDNRB/IRF4/TLE3/IGF1R/ADCYAP1/TNFRSF11A/PRDM16/PTH2R/PLAC8/PDGFC/LCN2/NOTCH1/DRD2/IL18/FOXO1/ACSL1/ADAMTS5/FLCN/PLCL2/NAPEPLD/ACOT11/SLN/KSR2/LEP/CIDEA/FOXC2/HOXC10/EHMT1/HSF1/ADRB3/ESRRG/EBF2/ACTN3/PTGS2/NMU/CCR2/ID1/CD36/DIO2/TNF	58
GO:0048864	stem cell development	35/812	2.44E-07	5.69E-06	3.92E-06	SOX8/ISL1/SEMA3C/MAPK3/PHOX2B/CORO1C/NRP2/TWIST1/BMP4/SOX9/ALDH1A2/EDNRB/MSI2/NRG1/FGF19/PITX2/HAND2/SHH/RET/NOLC1/GBX2/GDNF/ZEB2/NRTN/FOXC2/SOX11/ALX1/TBX1/SEMA4B/SEMA4D/SEMA4A/PDCD6/PTPRC/SEMA4G/OVOL2	35
GO:0021521	ventral spinal cord interneuron specification	10/812	2.44E-07	5.69E-06	3.92E-06	PAX6/DMRT3/GLI2/EVX1/GLI3/LHX3/SUFU/DBX1/NKX6-1/SOX1	10
GO:0060573	cell fate specification involved in pattern specification	10/812	2.44E-07	5.69E-06	3.92E-06	PAX6/DMRT3/GLI2/EVX1/GLI3/LHX3/SUFU/DBX1/NKX6-1/SOX1	10
GO:0051896	regulation of protein kinase B signaling	75/812	2.51E-07	5.83E-06	4.02E-06	F7/FGFR2/FGF10/FGF22/FGF4/FGFR1/PPP2R5C/HSP90AA1/PHLPP1/NOX4/ESR1/FGF9/TSC2/MAZ/STK3/MEIS3/PIK3R2/MET/RAPGEF1/GATA3/FGF8/GAB1/GCNT2/FGF1/F3/RAMP3/CCR7/KL/PDGFRA/SPRY2/RAC1/FGF5/EGF/IGF1R/PIK3R5/EPHA2/EGFR/MFHAS1/TCF7L2/DRD2/ITGB1/IL18/ADAM8/ANGPT1/FLCN/NRG1/XDH/NRG2/FGF19/MST1R/RET/IRS1/PIK3CD/PHLDA3/LEP/GRB2/TSPYL5/CIB1/FGF3/MAGI2/SRC/INPP5F/MIR34B/PDCD6/ERBB3/AREG/EREG/GDF15/CHI3L1/PIK3AP1/CX3C…	75
GO:0021520	spinal cord motor neuron cell fate specification	11/812	2.53E-07	5.86E-06	4.03E-06	PAX6/ISL1/GLI2/GLI3/LHX3/SUFU/HOXD10/ISL2/NKX6-1/OLIG3/HOXC10	11
GO:0048863	stem cell differentiation	78/812	2.60E-07	5.99E-06	4.12E-06	SOX8/ISL1/PSMA4/FGFR2/CBFB/TCF3/TP63/SEMA3C/PAX2/TP73/TBX5/ESR1/MAPK3/SFRP1/KDM4C/GATA3/PHOX2B/SOX6/CORO1C/NRP2/TBX2/HOXA7/TWIST1/RUNX2/BMP4/SOX9/ALDH1A2/PDGFRA/EDNRB/SIX3/ASCL1/OSR1/NOTCH1/HMGA2/MSI2/WNT3A/NRG1/RUNX1/ACE/FGF19/TAL1/MSX1/EOMES/PSMD6/PITX2/HAND2/SHH/SOX17/RET/NOLC1/GREM1/LTBP3/GBX2/GDNF/ZEB2/NRTN/FOXC2/SOX11/ALX1/HOXB4/NKX2-5/TBX1/SEMA4B/SEMA4D/SEMA4A/SOX18/PSMB8/PDCD6/PTPRC/SEMA4…	78
GO:0071695	anatomical structure maturation	72/812	2.87E-07	6.56E-06	4.52E-06	SOX8/POU2F2/CBFB/GAL/EPHA8/TRIP13/PAX2/FGFR1/PGR/MMP2/MAEA/NRCAM/VSX1/FERMT1/XYLT1/HOXA5/LHX6/GATA3/CCR6/RECK/CDKN1A/RUNX2/BFSP1/ALDH1A2/EPO/C1QL1/EDNRB/SIX3/ASCL1/SRRM4/ABHD2/RERE/TBX6/B4GALT5/HOXB13/SPTBN4/TAL1/TRIM58/NPPC/NFASC/NKX6-1/RET/GREM1/CDK5R2/BCL2/PDE3A/PHOSPHO1/CNTNAP2/LEP/IRX5/GRIN1/FAM20C/ZBTB7A/BHLHA15/CEND1/SEMA4D/AGRN/FAT4/RYR1/NF1/SOX18/BTK/BCL11A/MSX2/EREG/FOXA1/SPINK5/IHH/CX3…	72
GO:0035914	skeletal muscle cell differentiation	30/812	2.89E-07	6.59E-06	4.54E-06	CYP26B1/SOX8/PAX7/GPC1/ASB2/KLF5/PHOX2B/MYF6/BCL9/MEF2D/EGR2/HIVEP3/MYOD1/DMRTA2/MEGF10/GTF3C5/NOTCH1/VAX1/WNT3A/EPHB1/EOMES/HEYL/ANKRD2/FOS/NR1D2/SOX11/TBX1/PAX5/MIR1-1/SIX4	30
GO:0023019	signal transduction involved in regulation of gene expression	14/812	3.26E-07	7.41E-06	5.10E-06	PAX6/HNF4A/FGF8/PDGFRA/FGF5/PARP1/TBX6/NEUROD1/MSX1/SOX17/SMAD3/DAND5/EPCAM/MSX2	14
GO:0016358	dendrite development	72/812	3.45E-07	7.80E-06	5.38E-06	HECW1/SARM1/PREX2/ARID1B/FSTL4/SEZ6/CTNNA2/NGEF/CAMK2A/MAP2/CHRNA3/DNM1L/PTPRS/COBL/DVL1/CPEB3/CAPRIN2/CUX2/TULP1/PHACTR1/NR2E1/TLX2/EPHA4/NEUROG3/SLC12A5/MAP1B/BTBD3/DCLK1/DOCK10/ITPKA/ADAM10/RERE/SDK1/ITGB1/KLHL1/FARP1/FEZF2/TNIK/EPHB1/GRIP1/TIAM1/SHANK1/SHANK2/CSMD3/SLITRK5/SDC2/CTNND2/ALK/DSCAM/KNDC1/DAB1/FBXW8/BAIAP2/GRIN1/CAMK1D/DCC/SEMA4D/SIPA1L1/DNM3/ARC/GRIN3A/CUX1/CYFIP1/SRCIN1/BCL11A/R…	72
GO:0014902	myotube differentiation	42/812	3.60E-07	8.11E-06	5.59E-06	CYP26B1/CFLAR/CD9/HDAC4/NOS1/NFATC2/KLF5/HDAC5/EHD1/MYF6/BCL9/MYOD1/MYOF/SIK1/ACTA1/NOTCH1/ADAM12/SKI/CAPN2/SHH/ANKRD2/AVPR1A/SHOX2/BCL2/BDNF/TRIM72/BHLHA15/NKX2-5/TBX1/SMYD3/P2RX2/DNER/RYR1/CACNA1H/MIR1-1/MIR200B/XK/SIX4/CEACAM5/GDF15/CD53/KEL	42
GO:0051047	positive regulation of secretion	116/812	3.62E-07	8.12E-06	5.59E-06	FGR/CD38/TAC1/CACNA1G/BAIAP3/NADK/SYT7/ISL1/SYT1/GAL/FGFR1/AACS/OPRK1/DNM1L/STX1B/CACNA1I/NTSR1/FERMT1/MAPK3/SMPD3/GCK/GATA3/PANX1/EXPH5/SYT10/GNAI2/IL1A/SPTBN1/SDC1/CD58/CNR1/TWIST1/LRP1/IL1B/UNC13A/TRPM4/ANO1/VPS4A/SSTR4/PTPN22/VTCN1/GRP/HAVCR2/DHX9/EDNRB/RAC1/CASP1/ADCYAP1/TNFRSF11A/SNCA/TSLP/EGFR/CRH/TCF7L2/DRD2/VEGFC/FRMD4A/ADAM8/BMP6/ADCY8/SLC6A1/KCNB1/ITGB2/NKX6-1/UCN/CARTPT/CACNB2/RAB8B/A…	116
GO:0072089	stem cell proliferation	44/812	4.01E-07	8.97E-06	6.18E-06	PAX6/FGFR2/NDE1/SIRT6/FGFR1/MECOM/FERMT1/GLI3/RNF43/KCNA1/NR2E1/ARHGEF2/NEUROD4/TBX3/SIX3/ETV6/ASCL1/DMRTA2/SFRP2/NOTCH1/VAX1/DRD2/HMGA2/VEGFC/WNT3A/RUNX1/ACE/TERT/SHH/SOX17/LTBP3/OTP/ID4/OVOL1/CD34/SOX11/NF1/SOX18/TRIM71/PTPRC/EPCAM/OVOL2/CX3CR1/WNT7B	44
GO:0010631	epithelial cell migration	99/812	4.11E-07	9.16E-06	6.31E-06	PLXND1/TAC1/TBXA2R/MAP2K3/FLT4/BCAR1/FGF10/MAP4K4/FGF4/FGFR1/FAP/PXN/ANGPT2/CARD10/LGMN/MMP9/ANGPT4/FERMT1/MET/MEOX2/GATA3/HDAC5/CORO1C/NR2E1/CCR6/SMOC2/FGF1/FOXP1/NRP2/GIPC1/EFNB2/BMP4/SOX9/MACF1/KDR/STARD13/CYP1B1/DNAJA4/CDH13/EPHA2/IQSEC1/PTPRG/SLIT2/DOCK5/NOTCH1/ITGB1/VEGFC/PTPRR/ANGPT1/PRKCA/MIA3/ITGB2/BMPER/AMOTL1/GREM1/ZEB2/ROBO1/PRKCE/PLEKHG5/PTPRM/CLEC14A/FOXC2/EGR3/CCBE1/CIB1/SP1/SEMA4A…	99
GO:0032535	regulation of cellular component size	103/812	4.13E-07	9.19E-06	6.33E-06	CCL26/CAPG/FSTL4/CTNNA2/SPTB/SEMA3C/ADD2/ACTN2/CAPZB/MAP2/MT3/NRCAM/DPYSL2/HCK/CORO1A/COTL1/PTPRS/SLC12A7/ACTR3/SPTBN1/TNR/CIT/LRP1/SLC12A5/CCR7/MACF1/BAIAP2L2/ARPC1B/MAP1B/RAP1GAP2/KANK4/VAV3/NGF/VILL/RAC1/LRRC8A/SPTBN5/NTRK3/RPTOR/BARHL2/SLIT2/IQGAP2/RASA1/SLC12A9/PAK1/EPS8/POU4F2/WNT3A/FMN2/KCNMA1/VAV2/SPTBN4/NKX6-1/RYK/UCN/RET/ISLR2/CDC42EP5/PRKCE/DSCAM/BAIAP2/BDNF/GRB2/CDH4/MYADM/EFNA5/PRR16…	103
GO:0021879	forebrain neuron differentiation	24/812	4.16E-07	9.22E-06	6.35E-06	PAX6/FGFR2/LHX5/SALL1/DLX5/LHX6/FGF8/NRP2/BCL11B/NKX2-1/TBR1/ASCL1/DLX1/SLIT2/FEZF2/LHX8/UNCX/GBX2/ROBO1/DCLK2/OTP/CSF1R/SOX1/SALL3	24
GO:0060047	heart contraction	83/812	4.60E-07	1.01E-05	6.98E-06	TAC1/CACNA1G/CACNA2D2/MAP2K3/KCNQ1/KCNH2/PKP2/HDAC4/SREBF1/GNAO1/DNM1L/NOS1/FXYD3/SLC9A1/ITPR3/CHGA/SMAD7/PPP1R13L/CACNG7/BVES/PDE4D/FGF12/TNNI3K/RGS4/SLC8A2/TNNT2/ADRA1A/TBX2/KCNJ8/ITPR2/ATP1B2/KCNA5/CACNG6/TRPM4/TNNT3/MYBPC3/PDE5A/CACNG8/CORIN/ANK2/CACNA1B/DRD2/FXYD4/CACNA2D4/CACNA1C/GPD1L/CACNA2D3/ACTC1/ACE/SPTBN4/NPPC/ATP1A1/UCN/CACNB2/AVPR1A/STIM1/TACR3/ADRA1B/KCNK3/DES/IRX5/KCNE1/CHRM2/SLC8…	83
GO:0007187	G protein-coupled receptor signaling pathway, coupled to cyclic nucleotide second messenger	77/812	4.61E-07	1.01E-05	6.98E-06	TBXA2R/PTGER3/OPRK1/GNAO1/GNAS/NOS1/PALM/CHGA/HRH3/CRHR2/OPRM1/GRM6/NPR3/PDE4D/HRH2/GNAT1/GNAI2/OPRD1/CNR1/ADRA1A/PTGFR/NPY/RAMP3/GRM4/ADCY4/SSTR4/MTNR1B/ADCY3/LHCGR/GNAL/ADCYAP1/GNA12/HTR7/DRD2/GPHA2/PRKCA/GPR26/GPR78/ADCY8/GNAQ/HTR6/ADCY9/GRIK3/NPY1R/HTR4/ADCY1/GALR1/DRD5/ADRA1B/GPR37/ADRA1D/ADCY5/HTR1A/SSTR2/CHRM4/CHRM2/GALR2/NPY2R/ADRB3/GRM7/HRH1/GRK5/MIR1-1/GABBR1/S1PR3/CCL2/ADGRE2/ADGRE3/SS…	77
GO:0003012	muscle system process	125/812	5.00E-07	1.09E-05	7.52E-06	CFLAR/CD38/CACNA1G/TBXA2R/MAP2K3/MYOM2/PTGER3/KCNQ1/KCNH2/PKP2/TNFRSF1A/HDAC4/ACTN2/CHRNA3/GNAO1/PXN/NOS1/SLC9A1/SORBS1/CHGA/SMAD7/PPP1R13L/MYH14/COMP/P2RX1/KCNA1/PDE4D/FGF12/TACR1/TNNI3K/RGS4/TNNT2/ADRA1A/KCNJ8/GHSR/IL1B/DOCK4/MYOD1/KCNA5/TRPM4/TNNT3/GATA5/ATP8A2/MYH11/MYBPC3/DTNA/DYSF/EDNRB/MYOF/PLCE1/PDE5A/STAC2/TPM3/ACTA1/PARP1/STAC/ANK2/GLRA1/DOCK5/NOTCH1/HTR7/PAK1/DRD2/FOXO1/CACNA1C/GPD1L/P…	125
GO:0050708	regulation of protein secretion	125/812	5.00E-07	1.09E-05	7.52E-06	FGR/CD38/NOS2/CACNA2D2/BAIAP3/NADK/TFAP2B/SYT7/ISL1/MAP4K4/SREBF1/AACS/DNM1L/RAB11FIP3/ITPR3/CHGA/HNF4A/FERMT1/MAPK3/SFRP1/GCK/GATA3/PANX1/TCIRG1/EXPH5/OPRM1/FOXP1/IL1A/SPTBN1/IL1R2/CD58/SLC2A1/CNR1/GHSR/TWIST1/ITPR2/LRP1/IL1B/CCR7/TRAF2/KCNA5/TRPM4/ANO1/SNAP25/PTPN22/VTCN1/MTNR1B/HAVCR2/DHX9/RAC1/CASP1/CACNA1A/EPHA5/TSLP/EGFR/CRH/TCF7L2/DRD2/VEGFC/CACNA1C/FRMD4A/ADAM8/BMP6/ANGPT1/PRKCA/SLC16A1/A…	125
GO:0072171	mesonephric tubule morphogenesis	29/812	5.05E-07	1.10E-05	7.56E-06	SOX8/PAX2/SALL1/GLI3/GATA3/FGF8/FGF1/WNT6/TCF21/BMP4/SOX9/PAX8/HOXD11/OSR1/ADAMTS16/KIF26B/SHH/GDNF/NPNT/BCL2/CTNNBIP1/WT1/PBX1/PTCH1/FAT4/LHX1/HOXA11/SIX4/GREB1L	29
GO:0003208	cardiac ventricle morphogenesis	31/812	5.19E-07	1.12E-05	7.73E-06	ISL1/PKP2/COL11A1/FGFR2/SEMA3C/TBX5/SMAD7/FOXF1/PPP1R13L/GATA3/HAND1/TNNT2/MYBPC3/SFRP2/NOTCH1/POU4F1/NRG1/HEYL/HAND2/NPY5R/TBX20/ZFPM2/FOXC2/SOX11/NKX2-5/NPY2R/RXRA/MYH6/RYR2/GRHL2/FOXH1	31
GO:0033555	multicellular organismal response to stress	31/812	5.19E-07	1.12E-05	7.73E-06	TAC1/VDAC3/NOS1/SLC6A2/TRPA1/NR2E1/THBS4/EIF4G1/TACR1/LRP11/PRKCG/EDNRB/ADCYAP1/CRH/CACNA1B/CAPN2/UCN/GRIK2/RET/NPAS2/NEUROD2/BCL2/HTR1A/PENK/LPAR5/NPY2R/GABRA5/CCK/P2RX2/NTRK1/APOE	31
GO:0001508	action potential	47/812	5.73E-07	1.23E-05	8.50E-06	TAC1/CACNA1G/KCNQ1/KCNH2/PKP2/SLC9A1/NRCAM/HCN2/CACNA1I/NTSR1/CHRNA4/MYH14/P2RX1/KCNA1/FGF12/CNR1/ADRA1A/KCNJ8/KCNA5/TRPM4/MTNR1B/NTRK3/ANK2/GLRA1/CACNA1C/ANK3/GPD1L/GNAQ/KCNB1/GJD2/ATP1A1/CLDN19/GRIK2/CACNB2/KCNE1/GPR88/SLC8A1/CACNA1H/SCN8A/RYR2/MIR1-1/SCN4A/PTPN3/CD36/ATP1B1/SCN11A/GPR35	47
GO:0070588	calcium ion transmembrane transport	91/812	6.08E-07	1.30E-05	8.97E-06	CACNA1G/CACNA2D2/TRPC7/TRPM5/REM1/NOS1/SLC9A1/JPH4/ITPR3/CACNA1I/NTSR1/FGF14/CORO1A/TRPA1/GRIN2D/CACNG7/STIM2/PANX1/OPRM1/PDE4D/SLC8A2/RAMP3/ITPR2/AHNAK/CCR7/CACNG6/TRPM4/PKDREJ/DYSF/PLCB2/PLCE1/SLC24A4/STAC2/CACNA1A/CACNG8/PSEN2/STAC/SNCA/ANK2/CACNA1B/DRD2/TMC2/PLCH2/PLCB3/CACNA2D4/CACNA1C/THY1/JPH3/WNT3A/CACNA2D3/GRIN2C/TPCN2/CACNB2/STIM1/SLN/PRKCE/TMEM37/PARL/GRIN1/BHLHA15/ANXA2/SLC8A1/PLA2G6/…	91
GO:0043270	positive regulation of ion transport	81/812	6.09E-07	1.30E-05	8.97E-06	ABCB4/CNTN1/KCNQ1/KCNH2/PKP2/GAL/CAMK2A/ACTN2/OPRK1/TESC/NOS1/SLC9A1/NTSR1/FGF14/P2RX1/STIM2/KCNA1/GRM6/FGF12/FABP3/RAMP3/IL1B/WNK4/KCNC1/ATP1B2/SSTR4/ATP8A2/TNFRSF11A/STAC2/STAC/SNCA/ANK2/CRH/DRD2/ANK3/GPD1L/THY1/SLC6A1/UCN/WNK2/CACNB2/KCNC2/AVPR1A/STIM1/GDNF/PTAFR/TRH/LEP/GRIN1/KCNE1/GALR2/ANXA2/NKX2-5/LRRC55/PLA2G6/NPY2R/CCK/P2RX2/HTT/ARC/RYR2/STK39/GJC2/MIR1-1/CACNG3/PRSS8/ATP2C2/PLA2G10/P2RX…	81
GO:0048593	camera-type eye morphogenesis	43/812	6.57E-07	1.40E-05	9.65E-06	WNT16/SOX8/PAX6/TFAP2B/PAX2/FAT1/KDM2B/VSX1/CALB1/GLI3/PITX3/TBX2/TWIST1/BMP4/SOX9/ATP8A2/TFAP2A/FOXF2/STRA6/SIX3/EPHA2/SDK1/THY1/EPHB1/MEGF11/SKI/LRP5/PITX2/HCN1/PTF1A/DSCAM/PTPRM/IRX5/SOX11/FJX1/TSKU/SOX1/NF1/DLL1/LHX1/USH1C/AQP5/IHH	43
GO:0015849	organic acid transport	94/812	6.69E-07	1.42E-05	9.78E-06	ABCB4/NOS2/SLC6A13/SLC7A14/SLC11A1/SLC7A9/ABCC2/SYT1/SLC6A15/RIMS1/NCOA1/SLC26A4/SLC17A6/SLC16A8/HRH3/NTSR1/SLC32A1/SLC7A5/OCA2/SLC17A7/PRKAG2/SLC6A12/SLC27A6/RGS4/SLC16A7/SLC25A2/FABP3/GIPC1/IL1B/SLC27A1/SLC7A10/SLC6A6/SLC6A11/SNAP25/SSTR4/LRRC8A/STRA6/SLC13A5/SLC16A3/TNFRSF11A/PPFIA4/OSR1/SLC10A4/SNCA/DRD2/ACSL1/SLC16A1/SLC6A1/ACE/PDPN/SLC6A20/NPY5R/SLC6A18/SLC6A5/AVPR1A/SLC38A8/PROCA1/SLC43A2/…	94
GO:0071772	response to BMP	56/812	7.14E-07	1.50E-05	1.03E-05	TFAP2B/SMAD7/MAPK3/ZNF423/SMPD3/SFRP1/AMH/COMP/ETV2/DLX5/GATA3/FGF8/PHOX2B/RUNX2/BMP4/SOX9/GATA5/SKIL/SORL1/SMAD6/COL2A1/PCSK6/GDF7/DLX1/SFRP2/CRB2/NOTCH1/ADAMTS12/BMP6/GDF6/SKI/MSX1/HEYL/BMPER/HTRA1/FBN1/RBPMS2/GREM1/VSTM2A/RGMB/SOX11/DAND5/RGMA/NKX2-5/TMPRSS6/VWC2/MYH6/RYR2/SMURF1/BMPR2/ITGA3/MSX2/ID1/GDF15/AMHR2/TOB1	56
GO:0071773	cellular response to BMP stimulus	56/812	7.14E-07	1.50E-05	1.03E-05	TFAP2B/SMAD7/MAPK3/ZNF423/SMPD3/SFRP1/AMH/COMP/ETV2/DLX5/GATA3/FGF8/PHOX2B/RUNX2/BMP4/SOX9/GATA5/SKIL/SORL1/SMAD6/COL2A1/PCSK6/GDF7/DLX1/SFRP2/CRB2/NOTCH1/ADAMTS12/BMP6/GDF6/SKI/MSX1/HEYL/BMPER/HTRA1/FBN1/RBPMS2/GREM1/VSTM2A/RGMB/SOX11/DAND5/RGMA/NKX2-5/TMPRSS6/VWC2/MYH6/RYR2/SMURF1/BMPR2/ITGA3/MSX2/ID1/GDF15/AMHR2/TOB1	56
GO:0014032	neural crest cell development	33/812	7.14E-07	1.50E-05	1.03E-05	SOX8/ISL1/SEMA3C/MAPK3/PHOX2B/CORO1C/NRP2/TWIST1/BMP4/SOX9/ALDH1A2/EDNRB/NRG1/FGF19/PITX2/HAND2/SHH/RET/NOLC1/GBX2/GDNF/ZEB2/NRTN/FOXC2/SOX11/ALX1/TBX1/SEMA4B/SEMA4D/SEMA4A/PDCD6/SEMA4G/OVOL2	33
GO:0032355	response to estradiol	47/812	7.34E-07	1.54E-05	1.06E-05	CFLAR/CD38/F7/CASP8/FGF10/GSTP1/NCOA1/DNMT3B/ESR1/SFRP1/COL1A1/IGFBP2/DUSP1/SOCS2/GHSR/PTGFR/RAMP3/ALDH1A2/MYOD1/ARPC1B/MAP1B/DHH/CRHBP/EGFR/POU4F2/POU4F1/SLC6A1/UCN/HPGD/GJB2/TACR3/ARNT2/LEP/SSTR2/NQO1/PENK/HSF1/PTCH1/NCOR2/STRN3/PTGS2/AREG/MSX2/FOXA1/SSTR1/IHH/UGT1A1	47
GO:0098657	import into cell	61/812	7.72E-07	1.61E-05	1.11E-05	KCNH2/SLC9A3/NOS1/SLC9A1/HCN2/NTSR1/SLC6A2/CACNG7/ATP4A/SLC12A7/RGS4/KCNJ8/FABP3/RAMP3/SLC12A5/EFNB2/WNK4/SYNGR3/ATP1B2/SLC27A1/TRPM4/SLC6A11/SNAP25/SLC6A3/CACNG8/CNGA3/SNCA/SLC22A3/SLC12A9/SLC39A4/DRD2/KCNJ1/ACSL1/SLC6A1/KCNJ6/VPS28/ATP1A1/WNK2/SLC18A2/SLC6A5/GDNF/GSG1L/KCNK9/SLC9A4/MAPK15/SLC8A1/KCNJ12/ATP4B/DNM3/ARC/NEURL1B/ITGB3/CACNG3/IL10RA/SLC9A2/ATP1A4/CD36/SLC27A2/ATP1B1/SLC7A11/RAB3B	61
GO:0007263	nitric oxide mediated signal transduction	17/812	7.79E-07	1.62E-05	1.11E-05	NOS2/NOS1/MT2A/PDE5A/EGFR/GUCY1A2/DDAH1/NEUROD1/KCNC2/MAFA/NPY2R/DDAH2/APOE/CD36/PDX1/FPR1/NDNF	17
GO:0021602	cranial nerve morphogenesis	17/812	7.79E-07	1.62E-05	1.11E-05	PAX2/HOXA1/HOXA3/GLI3/NRP2/HOXB3/HOXB1/EGR2/HOXD3/TFAP2A/EPHB1/PHOX2A/NEUROG1/TBX1/MAFB/PLXNA4/TIFAB	17
GO:0035850	epithelial cell differentiation involved in kidney development	22/812	8.03E-07	1.66E-05	1.14E-05	WWTR1/PAX2/MMP9/SALL1/GATA3/BMP4/PAX8/PODXL/OSR1/NOTCH1/MYO1E/GDNF/CD34/FOXC2/BASP1/WT1/MAGI2/FAT4/LHX1/LIF/FOXJ1/PTPRO	22
GO:0048485	sympathetic nervous system development	14/812	8.20E-07	1.69E-05	1.16E-05	TFAP2B/TP63/GATA3/PHOX2B/NRP2/ASCL1/HAND2/PHOX2A/GDNF/INSM1/SOX11/NF1/NTRK1/PLXNA4	14
GO:0007616	long-term memory	18/812	8.56E-07	1.76E-05	1.21E-05	TAC1/RASGRF1/CALB1/SLC17A7/CPEB3/SGK1/LDLR/DRD2/ADCY8/SHANK1/ADCY1/RGS14/NPAS4/GRIN1/BTBD9/ARC/APOE/NTF4	18
GO:0021954	central nervous system neuron development	32/812	8.70E-07	1.78E-05	1.23E-05	FGFR2/GLI2/MAP2/HSP90AA1/LHX6/FGF8/PHOX2B/NR2E1/EPHA4/NRP2/NPY/DCLK1/ASCL1/SLIT2/DRD2/FEZF2/EPHB1/B4GALT5/SPTBN4/LHX8/GBX2/ZEB2/ROBO1/DCLK2/LEP/TSKU/SOX1/MAPT/DCC/PLXNA4/SALL3/EPHB3	32
GO:1900449	regulation of glutamate receptor signaling pathway	28/812	8.80E-07	1.80E-05	1.24E-05	RASGRF1/ACTN2/NECAB2/CACNG7/OPRM1/GRIA2/UNC13A/CACNG8/CNIH3/CRHBP/CRH/DLG2/GRIA4/SHANK1/SHANK2/NETO1/GSG1L/CNIH2/GRIN1/SHISA7/SHISA6/ARC/SHISA9/GRIN2B/NEFL/CACNG3/CCL2/CCR2	28
GO:0099173	postsynapse organization	54/812	9.15E-07	1.86E-05	1.28E-05	NGEF/ACTN1/MTMR2/DNM1L/NRCAM/NEFH/LGMN/CBLN1/PTPRS/DVL1/NRXN2/CAPRIN2/CUX2/EPHA4/NRP2/GHSR/DOCK10/ITPKA/ADAM10/IGF1R/NTRK3/TMEM108/INA/DLG2/EPHB1/TIAM1/LHFPL4/SHANK1/SHANK2/GDNF/CTNND2/CDH2/CEL/BAIAP2/NRXN1/MAGI2/SHISA7/SHISA6/IL1RAP/SIPA1L1/DNM3/ARC/GRIN2B/SRCIN1/NEFL/ITGA3/FCGR2B/APOE/LILRB2/ABHD17C/SLC7A11/EFNA1/ZNF804A/EPHB3	54
GO:0060326	cell chemotaxis	87/812	9.19E-07	1.86E-05	1.28E-05	CCL26/BCAR1/F7/FGF4/FGFR1/GSTP1/LGMN/CHGA/FLT1/CORO1A/MAPK3/MET/RARRES2/GAB1/IL23A/CCR6/SMOC2/THBS4/PDE4D/FGF1/DUSP1/CCRL2/IL1B/CCR7/KDR/DOCK4/TRPM4/ARHGEF16/VAV3/PDGFRA/DYSF/EDNRB/RAC1/IL1RN/ADAM10/CH25H/TNFRSF11A/EPHA2/ITGA9/SLIT2/NOTCH1/VEGFC/ADAM8/EPHB1/TIAM1/ITGB2/CXCR5/VCAM1/CXCR1/GREM1/HOXB9/PIK3CD/PLEKHG5/C3AR1/AZU1/EGR3/CAMK1D/PDE4B/HRH1/STK39/LYN/CCL2/PF4V1/BIN2/CSF3R/CCR2/NCKAP1L/CXCL6…	87
GO:1901888	regulation of cell junction assembly	61/812	9.41E-07	1.90E-05	1.31E-05	EPHA3/LIMCH1/CBFB/MAP4K4/SLC9A1/CBLN1/SFRP1/PTPRS/RAPGEF1/CORO1C/CUX2/MDGA1/EIF4G1/GHSR/SLITRK3/LRP1/SNAI1/MACF1/KDR/RAC1/NTRK3/EPHA2/LRTM1/SNCA/THY1/WNT3A/EPHB1/LHFPL4/CLSTN2/RUNX1/ACE/SLITRK5/LRFN5/SMAD3/FAM107A/CLSTN1/BDNF/GRIN1/SLITRK1/NRXN1/GPBAR1/CLDN5/EFNA5/FLRT2/THBS2/SLIT1/SEMA4D/AGRN/IL1RAP/SEMA4A/SRC/S100A10/MYO1C/NTRK1/LRRC24/SIX4/RAB17/ACE2/EPHB3/SLITRK6/TNF	61
GO:0051588	regulation of neurotransmitter transport	48/812	9.45E-07	1.90E-05	1.31E-05	BAIAP3/APBA2/SYT1/CAMK2A/RIMS1/CHRNA3/DNM1L/NOS1/STX1B/RIMS4/HRH3/NTSR1/CHRNA4/NAPA/DVL1/P2RX1/RGS4/CNR1/ADRA1A/GIPC1/PRKCG/UNC13A/SNCA/CPLX2/CRH/DRD2/SLC6A1/DGKI/ADCY1/CACNB2/PRKCB/GDNF/CPLX1/TRH/RIMS2/HTR1A/CHRM2/BACE1/NF1/GRIN3A/ITGB3/P2RX7/LILRB1/STX1A/KMO/RAB3B/CHRNA5/ADORA2B	48
GO:0099565	chemical synaptic transmission, postsynaptic	40/812	9.85E-07	1.98E-05	1.36E-05	SEZ6/RIMS1/CHRNA3/IGSF9B/MTMR2/STX1B/NTSR1/CHRNA4/CBLN1/SLC17A7/GRIN2D/DVL1/P2RX1/CUX2/OPRM1/RGS4/SH3GL1/TMEM108/SNCA/GLRA1/DRD2/DGKI/GRIN2C/SHANK1/SHANK2/GRIK2/GABRB3/NETO1/NPAS4/BAIAP2/RIMS2/GRIN1/NRXN1/NPY2R/P2RX2/CHRNG/GRIN2B/P2RX7/STX1A/CHRNA5	40
GO:0051402	neuron apoptotic process	72/812	1.00E-06	2.01E-05	1.39E-05	TFAP2B/TFAP2D/ISL1/HDAC4/TP63/SNCB/MT3/KDM2B/POU4F3/LGMN/DNAJC5/CORO1A/GATA3/FGF8/PITX3/CIT/LRP1/STAMBP/GRM4/PRKCG/CHL1/NGF/MTNR1B/FAIM2/TFAP2A/ASCL1/PARP1/DLX1/SNCA/RASA1/GABRB2/STAR/ADAM8/POU4F1/ANGPT1/KCNB1/EN1/TERT/GRIK2/EN2/GABRB3/GDNF/ITGAM/BCL2/FOXB1/HRAS/BNIP3/BDNF/GRIN1/NQO1/NTF3/GABRA5/BACE1/SLC30A10/NF1/NTRK1/MIR200A/MIR125B1/NEFL/ERBB3/HMOX1/SIX4/TOX3/MAG/CCL2/APOE/VSTM2L/FOXQ1/CX3CR1…	72
GO:0007631	feeding behavior	38/812	1.16E-06	2.31E-05	1.59E-05	GAL/OPRK1/OPRM1/OPRD1/LEPR/CNR1/PRLHR/GHSR/NPY/TCF15/PYY/ATP8A2/TBR1/HCRTR2/STRA6/DRD2/POU4F1/UCHL1/NAPEPLD/EN1/UCN/HAND2/NPY1R/NPY5R/CARTPT/TACR3/FOS/TRH/RXFP4/LEP/GRIN1/GALR2/NPY2R/CCK/BSX/NMU/ACE2/GDF15	38
GO:0043405	regulation of MAP kinase activity	94/812	1.19E-06	2.36E-05	1.63E-05	SPAG9/MAP2K3/FGF10/TRIB2/FGFR1/TP73/GSTP1/NOX4/MAPKAPK5/FLT1/MAPK3/CSK/SFRP1/RAPGEF1/DUSP16/FZD10/FGF1/EPHA4/RGS4/DUSP1/MAPK8IP1/FLT3/GRM4/BMP4/IL1B/MAP2K2/TRAF2/TRAF7/PTPN22/NGF/TAOK3/SPRY2/SORL1/PLCE1/PDE5A/EGF/MAPK8IP3/PDE6H/IGF1R/NTRK3/KSR1/PIK3R5/TNFRSF11A/CBLC/MAP3K6/SFRP2/PDGFC/EGFR/PAK1/ADAM8/GRM1/UCHL1/TNIK/TIAM1/NRG1/SPRY1/MST1R/CARTPT/RET/RGS14/ZEB2/ROBO1/ALK/MOS/TLR6/HRAS/ERN1/NTF3/SP…	94
GO:2000027	regulation of animal organ morphogenesis	75/812	1.20E-06	2.36E-05	1.63E-05	CFLAR/SOX8/CELSR3/BTBD7/ISL1/PSMA4/DMRT3/FGFR2/FGF10/SEMA3C/CELSR1/PAX2/FGFR1/TBX5/ESR1/SFRP1/DVL1/GATA3/FGF8/FGF1/WNT6/TBX2/TWIST1/RUNX2/BMP4/SOX9/PAX8/HOXD13/GATA5/RAC1/TFAP2A/ARHGEF19/SFRP2/RSPO2/NOTCH1/WNT3A/TIAM1/GRHL3/MSX1/PSMD6/PRICKLE2/RYK/SPRY1/HAND2/SHH/SOX17/GREM1/GDNF/ROBO1/BCL2/VANGL1/CD34/FOXC2/BASP1/AP2A2/GPC6/TBX1/WT1/RXRA/MAGI2/SP6/AJAP1/SMURF1/PAX9/BMPR2/PSMB8/LHX1/HOXA11/CEACAM…	75
GO:0035023	regulation of Rho protein signal transduction	48/812	1.20E-06	2.36E-05	1.63E-05	TRIO/PREX2/RASGRF1/NGEF/ARHGEF10L/ARHGEF1/ARHGEF7/ARHGEF10/ARHGEF18/RASIP1/MET/ARHGEF17/KCTD10/RASGRF2/ARHGEF2/ADRA1A/MCF2L/ARHGEF16/VAV3/ARHGEF4/RAC1/ARHGEF19/ABL2/TIAM2/ITGB1/EPS8/FARP1/OBSCN/FGD5/FLCN/TIAM1/ABR/VAV2/ROBO1/PLEKHG5/SPATA13/PLEKHG7/ITSN2/ITGA3/PLEKHG6/GPR18/APOE/EPS8L1/GPR65/FGD2/F2RL1/GPR35/EPS8L3	48
GO:0048934	peripheral nervous system neuron differentiation	10/812	1.23E-06	2.42E-05	1.66E-05	ISL1/RUNX3/NEFH/HOXD9/HOXD10/POU4F1/RUNX1/ISL2/HAND2/ONECUT2	10
GO:0048935	peripheral nervous system neuron development	10/812	1.23E-06	2.42E-05	1.66E-05	ISL1/RUNX3/NEFH/HOXD9/HOXD10/POU4F1/RUNX1/ISL2/HAND2/ONECUT2	10
GO:0015844	monoamine transport	35/812	1.23E-06	2.42E-05	1.66E-05	SYT7/SYT1/OPRK1/NOS1/CHGA/HRH3/CHRNA4/SLC6A2/P2RX1/SYT10/CNR1/GHSR/SYT5/SYT6/SLC6A3/SNCA/SLC22A3/CRH/DRD2/KCNB1/UCN/CARTPT/SLC18A2/GDNF/HTR1A/MAPK15/NPY2R/SYT3/ITGB3/SYT13/LILRB1/STX1A/SYT8/RAB3B/P2RY12	35
GO:0060675	ureteric bud morphogenesis	28/812	1.29E-06	2.52E-05	1.73E-05	SOX8/PAX2/SALL1/GLI3/GATA3/FGF8/FGF1/WNT6/TCF21/BMP4/SOX9/PAX8/HOXD11/ADAMTS16/KIF26B/SHH/GDNF/NPNT/BCL2/CTNNBIP1/WT1/PBX1/PTCH1/FAT4/LHX1/HOXA11/SIX4/GREB1L	28
GO:0048701	embryonic cranial skeleton morphogenesis	22/812	1.31E-06	2.55E-05	1.76E-05	FGFR2/GNAS/TBX15/HOXA1/HOXA2/PRRX1/TWIST1/RUNX2/BMP4/PDGFRA/TFAP2A/MMP16/ALX3/SMAD3/CHST11/FOXC2/IRX5/TBX1/PAX5/LHX1/GRHL2/SIX4	22
GO:0021987	cerebral cortex development	41/812	1.35E-06	2.62E-05	1.80E-05	PAX6/SYNE2/NDE1/NCOA1/LAMB1/PTPRS/GLI3/LHX2/LHX6/PHACTR1/NR2E1/SLC2A1/NPY/LRP1/BTBD3/EMX1/NKX2-1/TBR1/TACC2/ASCL1/DMRTA2/SLIT2/EGFR/HTR6/EOMES/TRAPPC9/ROBO1/EMX2/CDH2/CDK5R2/DAB1/CNTNAP2/BNIP3/GRIN1/PAX5/FAT4/NF1/POU3F3/CCDC85C/NEFL/P2RY12	41
GO:0042445	hormone metabolic process	70/812	1.58E-06	3.03E-05	2.09E-05	CYP26B1/IYD/DKK3/GAL/CHAT/FGFR1/AKR1B1/ESR1/CYP26A1/CRYM/GATA3/CYP2C18/HSD17B1/STC2/RBP1/SLC5A7/ECE1/PRLHR/CHST8/TRERF1/IL1B/PAX8/PCSK2/SRD5A3/ALDH1A2/NGF/PDGFRA/NR5A1/CYP1B1/DUOXA1/DUOXA2/DUOX2/PCSK6/ECE2/CORIN/STAR/CRH/TCF7L2/BMP6/ACE/DHRS3/ATP1A1/PLB1/SHH/CRABP1/SDR16C5/LEP/PCSK1/FOXE1/CACNA1H/BCO2/SLC44A4/SRD5A2/CYP3A5/TPO/FOXA1/ACE2/BCO1/CYP2C9/CRABP2/CYP3A4/CPA3/KLK6/AKR1B10/AKR1C4/DIO2/AKR…	70
GO:0097305	response to alcohol	70/812	1.58E-06	3.03E-05	2.09E-05	TBXA2R/F7/CASP8/CLDN18/FGFR2/AACS/OPRK1/GSTP1/MLC1/SFRP1/GATA3/RECQL5/APOBEC1/OPRM1/XRN1/RGS4/CNR1/PTGFR/ITPR2/CDKN1A/FOSB/CCR7/CDO1/CYP2E1/ADCY3/NTRK3/ADCYAP1/SLC6A3/PARP1/SLIT2/CRHBP/GLRA1/STAR/CRH/DRD2/EPS8/ADCY8/ACTC1/VCAM1/NPPC/HPGD/ADCY1/CA3/KCNC2/AVPR1A/CYP7A1/PTGDR/FOS/TRH/PRKCE/ADCY5/NPAS4/LEP/GRIN1/NQO1/PENK/SLIT3/EFNA5/PTCH1/EIF4EBP1/GRIN3A/BGLAP/GRIN2B/NEFL/SPI1/MAP4K1/CCR5/CYBB/FOSL1…	70
GO:0030098	lymphocyte differentiation	97/812	1.67E-06	3.20E-05	2.21E-05	CYP26B1/PGLYRP1/RUNX3/NCAPH2/POU2F2/PRDM1/CBFB/HDAC4/RORA/TCF3/TBX21/GLI2/TPD52/NFATC2/SMAD7/SFRP1/LFNG/GLI3/GATA3/ZMIZ1/HDAC5/ZBTB16/TCIRG1/IL23A/CCR6/FOXP1/ITGA4/IL1RL2/LEPR/NKX2-3/FLT3/RUNX2/BMP4/PAX1/CCR7/BCL11B/PTPN22/DOCK2/DOCK10/LRRC8A/IRF4/ITGB1/IL18/ADAM8/CD8A/CEBPG/SH3RF1/PLCL2/CD1D/RUNX1/PGLYRP2/VCAM1/EOMES/SHH/LY6D/ONECUT1/PIK3CD/BCL2/LEP/ZBTB7A/EGR3/ZFPM1/IKZF1/SEMA4A/CARD11/NTRK1/DL…	97
GO:1901215	negative regulation of neuron death	64/812	1.78E-06	3.40E-05	2.35E-05	TFAP2B/TFAP2D/ISL1/SNCB/MT3/KDM2B/LGMN/CHGA/DNAJC5/CORO1A/FGF8/EIF4G1/LRP1/STAMBP/PRKCG/TRAF2/EPO/CHL1/NGF/MTNR1B/FAIM2/GPNMB/SORL1/DLX1/SNCA/RASA1/GABRB2/STAR/ADAM8/POU4F1/ANGPT1/WNT3A/EN1/UCN/TERT/GRIK2/EN2/GABRB3/GDNF/BCL2/FOXB1/CD34/HRAS/BDNF/GRIN1/HSF1/NTF3/GABRA5/SLC30A10/NTRK1/NEFL/ERBB3/HMOX1/SIX4/TOX3/MAG/CCL2/APOE/VSTM2L/SLC7A11/FOXQ1/CX3CR1/NDNF/NTF4	64
GO:0046942	carboxylic acid transport	92/812	1.81E-06	3.45E-05	2.38E-05	ABCB4/NOS2/SLC6A13/SLC7A14/SLC11A1/SLC7A9/ABCC2/SYT1/SLC6A15/RIMS1/NCOA1/SLC26A4/SLC17A6/SLC16A8/HRH3/NTSR1/SLC32A1/SLC7A5/OCA2/SLC17A7/PRKAG2/SLC6A12/SLC27A6/RGS4/SLC16A7/SLC25A2/FABP3/GIPC1/IL1B/SLC27A1/SLC7A10/SLC6A6/SLC6A11/SNAP25/SSTR4/LRRC8A/STRA6/SLC13A5/SLC16A3/TNFRSF11A/PPFIA4/SLC10A4/SNCA/DRD2/ACSL1/SLC16A1/SLC6A1/ACE/PDPN/SLC6A20/NPY5R/SLC6A18/SLC6A5/AVPR1A/SLC38A8/PROCA1/SLC43A2/MFSD2…	92
GO:0001658	branching involved in ureteric bud morphogenesis	26/812	1.82E-06	3.46E-05	2.38E-05	SOX8/PAX2/SALL1/GLI3/FGF8/FGF1/WNT6/TCF21/BMP4/SOX9/PAX8/HOXD11/ADAMTS16/SHH/GDNF/NPNT/BCL2/CTNNBIP1/WT1/PBX1/PTCH1/FAT4/LHX1/HOXA11/SIX4/GREB1L	26
GO:0007188	adenylate cyclase-modulating G protein-coupled receptor signaling pathway	67/812	1.84E-06	3.49E-05	2.41E-05	TBXA2R/PTGER3/OPRK1/GNAO1/GNAS/NOS1/PALM/CHGA/HRH3/CRHR2/OPRM1/GRM6/NPR3/PDE4D/GNAT1/GNAI2/OPRD1/CNR1/ADRA1A/PTGFR/RAMP3/GRM4/ADCY4/SSTR4/ADCY3/LHCGR/GNAL/ADCYAP1/GNA12/DRD2/GPHA2/PRKCA/GPR26/GPR78/ADCY8/GNAQ/ADCY9/GRIK3/NPY1R/ADCY1/GALR1/DRD5/ADRA1B/GPR37/ADRA1D/ADCY5/HTR1A/SSTR2/CHRM4/CHRM2/GALR2/NPY2R/ADRB3/GRM7/GRK5/MIR1-1/GABBR1/S1PR3/ADGRE2/ADGRE3/GPR65/ADGRF1/P2RY12/ADORA2B/FPR1/ADGRE1/HTR…	67
GO:0002573	myeloid leukocyte differentiation	63/812	1.86E-06	3.52E-05	2.42E-05	CASP8/SBNO2/CLDN18/GNAS/TESC/EFNA2/MMP9/SFRP1/GATA3/TCIRG1/IL23A/FOXP1/NKX2-3/HOXA7/GLO1/BMP4/CCR7/CBFA2T3/ZBTB46/IRF4/TNFRSF11A/EPHA2/PARP1/POU4F2/POU4F1/PRKCA/LRRK1/RUNX1/TAL1/CARTPT/FBN1/FOS/PIK3CD/FAM20C/CTNNBIP1/ZFPM1/FES/CSF1R/ANXA2/MITF/NF1/SRC/MAFB/MIR125B1/BGLAP/LYN/SPI1/CEACAM1/SNX10/CEBPE/LILRB1/LIF/IL34/C1QC/GAB3/CCR1/F2RL1/DCSTAMP/HCLS1/EVI2B/LILRB4/LILRB3/TNF	63
GO:0021513	spinal cord dorsal/ventral patterning	14/812	1.89E-06	3.55E-05	2.44E-05	PAX6/DMRT3/GLI2/EVX1/GLI3/LHX3/SUFU/DBX1/RFX4/NKX2-2/ASCL1/NKX6-1/SHH/SOX1	14
GO:0030878	thyroid gland development	14/812	1.89E-06	3.55E-05	2.44E-05	FGF10/MAPK3/HOXA3/HOXA5/FGF8/HOXB3/PAX8/HOXD3/NKX2-1/SHH/SMAD3/FOXE1/NKX2-5/TBX1	14
GO:0046058	cAMP metabolic process	14/812	1.89E-06	3.55E-05	2.44E-05	PDE4A/PDE4C/PDE10A/PDE8B/PDE4D/ADCY4/ADCY3/EPHA2/ADCY10/ADCY8/ADCY9/ADCY1/ADCY5/PDE4B	14
GO:0007229	integrin-mediated signaling pathway	38/812	2.03E-06	3.80E-05	2.62E-05	FGR/ITGAL/BCAR1/LAMA3/ADAM11/ITGA8/ITGAE/ITGA6/MADCAM1/FERMT1/HCK/ITGA4/ITGB4/VAV3/ITGA11/ADAM10/ITGB7/ITGA9/FERMT3/ITGB1/DST/THY1/ZYX/ITGB2/ITGAM/SRC/ITGBL1/EMP2/ITGB3/ITGA3/CDH17/CEACAM1/FYB1/ITGB8/PLEK/PRAM1/ITGAX/ITGAD	38
GO:0043547	positive regulation of GTPase activity	108/812	2.07E-06	3.85E-05	2.65E-05	CCL26/PREX2/TBC1D22A/RASGRF1/TBC1D1/MAP4K4/ARHGEF10L/RASAL2/RGS11/ARHGEF1/GNAO1/DNM1L/ASAP3/ITGA6/RGS17/RIN3/SEC23B/ARHGEF7/TSC2/SFRP1/ARHGEF10/ADAP1/DOCK8/RAPGEF1/CORO1C/RASAL1/FZD10/APC2/ELMOD3/RGS4/ARAP3/ARHGAP9/CCR7/DOCK4/ARHGEF16/TBC1D5/LLGL1/RAP1GAP2/TBC1D14/RIN2/STARD13/VAV3/DOCK2/DOCK10/GIT2/NTRK3/ADCYAP1/TBCD/EVI5L/EPHA2/ARHGEF19/IQSEC1/TBCK/RASA1/TIAM2/DOCK5/RGS20/USP6NL/RGS10/ITGB1/ASA…	108
GO:2000177	regulation of neural precursor cell proliferation	34/812	2.07E-06	3.85E-05	2.65E-05	PAX6/GLI2/KDM2B/LHX5/GLI3/LHX2/RAPGEF1/PITX3/NR2E1/GNAI2/EMX1/SIX3/EGF/ASCL1/ADCYAP1/DMRTA2/NOTCH1/VAX1/DRD2/VEGFC/FOXO1/WNT3A/SHH/CDH2/SHCBP1/OTP/INSM1/CEND1/NF1/GJC2/TRIM71/LYN/LHX1/CX3CR1	34
GO:0008344	adult locomotory behavior	31/812	2.08E-06	3.85E-05	2.65E-05	PREX2/SEZ6/DMRT3/NTSR1/GRIN2D/FGF12/EPHA4/OPRD1/HOXB8/HOXD9/HOXD10/CHL1/SNCA/GLRA1/DRD2/KLHL1/EPS8/ZIC1/UCHL1/SPTBN4/EN1/GDNF/TRH/DAB1/GRIN1/BTBD9/CEND1/INPP5F/FOXA2/SLITRK6/NTF4	31
GO:0001756	somitogenesis	29/812	2.21E-06	4.08E-05	2.81E-05	SEMA3C/PLXNA2/DLL3/FOXF1/SFRP1/LFNG/COBL/MEOX2/MYF6/TBX18/CDX1/PAX1/TCF15/ALDH1A2/PCDH8/SFRP2/CRB2/NOTCH1/TBX6/WNT3A/SMAD3/AXIN2/ZEB2/FOXB1/DMRT2/FOXC2/DLL1/RIPPLY2/LHX1	29
GO:0010001	glial cell differentiation	66/812	2.31E-06	4.25E-05	2.93E-05	SOX8/PAX6/CD9/LAMC3/GPC1/FGF10/PAX2/TP73/GSTP1/MT3/MAPK3/CSK/ARHGEF10/GLI3/PHOX2B/SOX6/NR2E1/EPHA4/EGR2/CDKN2C/NEUROD4/LRP1/SOX9/IL1B/NKX2-2/LDLR/EMX1/NKX2-1/FGF5/ASCL1/NTRK3/DLX1/TTBK1/EGFR/NOTCH1/PRDM8/NRG1/SKI/B4GALT5/SLC45A3/TAL1/NKX6-1/SHH/CDH2/ID4/DAB1/BNIP3/SOX11/OLIG1/POU3F1/MAPT/DNER/NF1/DLL1/OLIG2/LYN/ERBB3/FA2H/MAG/MYRF/LIF/IL34/SH3TC2/C1QA/TNF/ZNF488	66
GO:0031279	regulation of cyclase activity	21/812	2.33E-06	4.27E-05	2.94E-05	NOS2/GUCA1A/NPFFR2/NOS1/PALM/MAPK3/NPR3/GNAI2/EDNRB/CACNA1C/GALR1/STIM1/DRD5/GALR2/GRM7/NF1/CCR2/GPR87/ADORA2B/PDZD3/P2RY13	21
GO:0110110	positive regulation of animal organ morphogenesis	32/812	2.33E-06	4.27E-05	2.94E-05	CFLAR/SOX8/FGFR2/FGF10/SEMA3C/PAX2/FGFR1/GATA3/FGF8/FGF1/WNT6/TWIST1/BMP4/SOX9/PAX8/GATA5/TFAP2A/NOTCH1/WNT3A/SPRY1/HAND2/GDNF/ROBO1/CD34/BASP1/WT1/LHX1/HOXA11/SIX4/HOXC11/LIF/AMTN	32
GO:0060079	excitatory postsynaptic potential	37/812	2.54E-06	4.62E-05	3.18E-05	SEZ6/RIMS1/CHRNA3/MTMR2/STX1B/CHRNA4/CBLN1/SLC17A7/GRIN2D/DVL1/P2RX1/CUX2/OPRM1/RGS4/SH3GL1/TMEM108/SNCA/GLRA1/DRD2/DGKI/GRIN2C/SHANK1/SHANK2/GRIK2/NETO1/NPAS4/BAIAP2/RIMS2/GRIN1/NRXN1/NPY2R/P2RX2/CHRNG/GRIN2B/P2RX7/STX1A/CHRNA5	37
GO:0099601	regulation of neurotransmitter receptor activity	30/812	2.55E-06	4.62E-05	3.18E-05	RASGRF1/ACTN2/CACNG7/NPTX2/OPRM1/GRIA2/SLURP1/CACNG8/CNIH3/CRHBP/CRH/DLG2/GRIA4/SHANK1/SHANK2/NETO1/GSG1L/CNIH2/GRIN1/SHISA7/SHISA6/SRC/ARC/SHISA9/GRIN2B/NEFL/CACNG3/CCL2/CCR2/PSCA	30
GO:0001558	regulation of cell growth	110/812	2.57E-06	4.65E-05	3.21E-05	CD38/EXTL3/PRDM11/BCAR1/FSTL4/SYT1/IP6K2/GAL/SEMA3C/MAP2/RIMS1/EPB41L3/MT3/KDM2B/LTBP4/SLC9A1/NRCAM/DPYSL2/HNF4A/ADNP2/SFRP1/PTPRS/CACNG7/KAZALD1/TMEM97/CAPRIN2/RASAL1/EIF4G1/TNR/MAD2L2/RGS4/SGK1/SOCS2/CDKN2C/LRP1/CDKN1A/MACF1/INO80/SH3BP4/UNC13A/SESN2/MAP1B/NGF/ACVR1B/ADAM10/PLCE1/FBLN5/NTRK3/RPTOR/IGFBP4/BARHL2/SLIT2/SFRP2/EGFR/IGFBP3/PAK1/POU4F2/SPOCK1/WNT3A/FLCN/LMX1A/MSX1/NKX6-1/APBB2/RYK/UC…	110
GO:0060512	prostate gland morphogenesis	16/812	2.65E-06	4.78E-05	3.29E-05	FGFR2/FGF10/TP63/GLI2/ESR1/SFRP1/BMP4/SOX9/HOXD13/NOTCH1/HOXB13/SHH/ID4/RXRA/SERPINB5/FOXA1	16
GO:0061053	somite development	34/812	2.80E-06	5.03E-05	3.47E-05	SEMA3C/PLXNA2/DLL3/FOXF1/SFRP1/LFNG/COBL/MEOX2/MYF6/TBX18/CDX1/PAX1/TCF15/ALDH1A2/PCDH8/SFRP2/CRB2/NOTCH1/TBX6/WNT3A/SHH/SMAD3/AXIN2/ZEB2/FOXB1/DMRT2/FOXC2/SOX11/PTCH1/DLL1/RIPPLY2/LHX1/SIX4/IHH	34
GO:0031016	pancreas development	31/812	2.88E-06	5.16E-05	3.55E-05	PAX6/ISL1/FGF10/HNF4A/MSLN/FOXF1/MET/NKX3-2/NR5A2/NEUROG3/BMP4/SOX9/NKX2-2/ALDH1A2/CCDC40/ILDR2/TCF7L2/FOXO1/BMP6/NEUROD1/NKX6-1/SHH/PTF1A/ONECUT1/INSM1/DLL1/ONECUT2/FOXA2/HNF1A/PDX1/IHH	31
GO:0090092	regulation of transmembrane receptor protein serine/threonine kinase signaling pathway	71/812	2.91E-06	5.20E-05	3.59E-05	CREBBP/TFAP2B/ZC3H3/WWTR1/DKK3/FGF10/ITGA8/LTBP4/FERMT1/SMAD7/FGF9/ZNF423/SFRP1/SNX25/SPTBN1/GIPC1/PMEPA1/BMP4/RASL11B/ACVR1B/NKX2-1/SKIL/DMRT1/SORL1/SMAD6/FBN2/PCSK6/PRDM16/PARP1/GDF7/DLX1/SFRP2/CRB2/NOTCH1/BMP3/BMP6/FLCN/GDF6/RBPMS/SKI/MSX1/TBX20/BMPER/SHH/HTRA1/FBN1/RBPMS2/GREM1/SMAD3/NPNT/ONECUT1/CHST11/CIDEA/SOX11/ZBTB7A/DAND5/TMPRSS6/MAGI2/VWC2/ADAMTSL2/SMURF1/BMPR2/GDF10/ITGA3/ONECUT2/MSX2…	71
GO:0014065	phosphatidylinositol 3-kinase signaling	49/812	2.92E-06	5.22E-05	3.59E-05	FGR/WNT16/FLT4/PREX2/LTK/FGFR1/PPP2R5C/FLT1/MAPK3/TSC2/MAZ/PIK3R2/GATA3/GAB1/FLT3/TWIST1/STAMBP/SOX9/KDR/EPO/PIK3C2B/PDGFRA/CEP55/IGF1R/NTRK3/PIK3R5/PDGFC/EGFR/IL18/ANGPT1/IRS1/PIK3CD/LEP/NTF3/SEMA4D/NF1/SRC/NTRK1/LIME1/LYN/ERBB3/CEACAM1/HCST/PIK3AP1/NCF1/F2RL1/RASGRP1/HCLS1/TNF	49
GO:1902105	regulation of leukocyte differentiation	78/812	3.03E-06	5.38E-05	3.71E-05	CYP26B1/PGLYRP1/RUNX3/PRDM1/CASP8/CLDN18/CBFB/TBX21/GLI2/GNAS/TESC/NFATC2/SMAD7/SFRP1/GLI3/GATA3/ZMIZ1/ZBTB16/IL23A/FOXP1/IL1RL2/HOXA7/BMP4/ZBTB46/IRF4/IL18/POU4F2/ADAM8/POU4F1/PRKCA/SH3RF1/RUNX1/PGLYRP2/TAL1/CARTPT/SHH/FBN1/FOS/CTNNBIP1/EGR3/ZFPM1/FES/MITF/NF1/CARD11/TOX/MAFB/MIR125B1/BGLAP/LYN/BTK/FCGR2B/CEACAM1/PTPRC/LILRB1/ZAP70/TMEM131L/CCR2/SASH3/NCKAP1L/LIF/FOXJ1/LILRB2/SPINK5/IL34/C1QC/PG…	78
GO:0001755	neural crest cell migration	25/812	3.17E-06	5.63E-05	3.88E-05	SOX8/ISL1/SEMA3C/PHOX2B/CORO1C/NRP2/TWIST1/BMP4/EDNRB/FGF19/PITX2/HAND2/SHH/RET/GBX2/GDNF/ZEB2/NRTN/ALX1/TBX1/SEMA4B/SEMA4D/SEMA4A/SEMA4G/OVOL2	25
GO:0061572	actin filament bundle organization	32/812	3.47E-06	6.13E-05	4.23E-05	TAC1/LIMCH1/ACTN1/ARHGEF10L/ADD2/FSCN1/NOX4/ASAP3/PXN/SLC9A1/SORBS1/SFRP1/ARHGEF10/MET/FSCN3/PHACTR1/DPYSL3/BAIAP2L2/RAC1/RHOF/TMEFF2/ESPNL/FAM171A1/PAK1/EPS8/FMN2/ZYX/SHANK1/SHROOM1/SMAD3/FAM107A/SYNPO/SYNPO2/SH3PXD2B/BAIAP2/FSCN2/PFN3/SRC/S100A10/BAIAP2L1/USH1C/WAS/ARHGAP28/PLEK/PLS1/ID1/LCP1/GPR65/RFLNA/AIF1/SPIRE2	51
GO:0008217	regulation of blood pressure	57/812	3.48E-06	6.13E-05	4.23E-05	TAC1/TBXA2R/NOS2/NOS1/PTGS1/CHGA/NTSR1/P2RX1/NPR3/PDE4D/POMC/ECE1/CNR1/SGK1/ADRA1A/NPY/EDNRB/CORIN/ADAMTS16/CRH/CACNA1B/DRD2/PLCB3/VEGFC/DDAH1/F11R/ACE/LRP5/ATP1A1/UCN/NPY1R/CARTPT/AVPR1A/NAV2/SMAD3/PTAFR/DRD5/TACR3/ADRA1B/CD34/LEP/P2RX2/ADRB3/MYH6/STK39/DLL1/BMPR2/EMP2/RASL10B/PTGS2/HMOX1/NMU/ACE2/PTPRO/CPA3/F2RL1/CYP4F12	57
GO:0051017	actin filament bundle assembly	50/812	3.55E-06	6.24E-05	4.30E-05	TAC1/LIMCH1/ACTN1/ARHGEF10L/ADD2/FSCN1/NOX4/ASAP3/PXN/SLC9A1/SORBS1/SFRP1/ARHGEF10/MET/FSCN3/PHACTR1/DPYSL3/BAIAP2L2/RAC1/RHOF/TMEFF2/ESPNL/FAM171A1/PAK1/EPS8/FMN2/ZYX/SHANK1/SHROOM1/SMAD3/FAM107A/SYNPO/SYNPO2/SH3PXD2B/BAIAP2/FSCN2/PFN3/SRC/S100A10/BAIAP2L1/USH1C/WAS/ARHGAP28/PLEK/PLS1/ID1/LCP1/GPR65/AIF1/SPIRE2	50
GO:0008016	regulation of heart contraction	73/812	3.56E-06	6.24E-05	4.30E-05	TAC1/CACNA1G/CACNA2D2/KCNQ1/KCNH2/PKP2/HDAC4/SREBF1/GNAO1/NOS1/FXYD3/SLC9A1/ITPR3/CHGA/SMAD7/CACNG7/BVES/PDE4D/TNNI3K/RGS4/SLC8A2/TNNT2/ADRA1A/TBX2/ITPR2/ATP1B2/KCNA5/CACNG6/TRPM4/PDE5A/CACNG8/CORIN/ANK2/CACNA1B/DRD2/FXYD4/CACNA2D4/CACNA1C/GPD1L/CACNA2D3/SPTBN4/NPPC/ATP1A1/UCN/CACNB2/AVPR1A/STIM1/TACR3/ADRA1B/KCNK3/DES/IRX5/KCNE1/CHRM2/SLC8A1/NKX2-5/KCNJ12/PDE4B/KCNIP4/RYR1/CACNA1H/MYH6/RYR2/RYR3…	73
GO:0019935	cyclic-nucleotide-mediated signaling	64/812	3.62E-06	6.33E-05	4.36E-05	TBXA2R/PTGER3/PDE4A/GAL/GNAS/NOS1/CHGA/MGRN1/RUNDC3A/OPRM1/PDE10A/PDE4D/GNAI2/PEX5L/ADRA1A/PTGFR/RAMP3/SOX9/ADCY4/SSTR4/MTNR1B/EDNRB/ADCY3/LHCGR/KSR1/GNAL/ADCYAP1/EPHA5/CRH/DRD2/GPHA2/PRKCA/GPR26/GPR78/ADCY8/GNAQ/ADCY9/NPPC/UCN/ADCY1/KCNC2/GALR1/DRD5/ADRA1B/ADRA1D/PDE3A/ADCY5/NUDT4/RIMS2/GALR2/NPY2R/PRKAR1B/ADRB3/MIR1-1/ADGRE2/PDE11A/APOE/ADGRE3/CD36/GPR65/ADGRF1/ADORA2B/PDZD3/ADGRE1	64
GO:0051048	negative regulation of secretion	70/812	3.63E-06	6.33E-05	4.36E-05	PTGER3/TNFRSF1A/MAP4K4/SREBF1/OPRK1/RAB11FIP3/CHGA/HRH3/FOXF1/SFRP1/OPRM1/GNAI2/IL1R2/CNR1/GHSR/IL1B/WNK4/PTPN22/MTNR1B/EGF/SNCA/CRHBP/CRH/NOTCH1/DRD2/FRMD4A/ANGPT1/NRG1/KCNB1/ABR/UCN/NPY5R/CARTPT/MIDN/IRS1/TRH/CD34/TLR6/LEP/CIDEA/SSC5D/NEUROG1/IDH2/NPY2R/GRM7/NF1/NMB/STK39/TRIM27/SRCIN1/CD22/ERBB3/CD84/FCGR2B/CEACAM1/HMOX1/TLR8/LILRB1/NMU/CCR2/LIF/APOE/NLRP12/TFF2/F2RL1/CD300A/P2RY12/FAM3D/TNF/T…	70
GO:0072659	protein localization to plasma membrane	75/812	3.67E-06	6.38E-05	4.40E-05	ANK1/EPHA3/PKP2/TNFRSF1A/ACTN2/EPB41L3/TESC/SORBS1/PALM/CSK/ANXA13/CLIP3/AGR2/SPTBN1/RAMP3/LRP1/MACF1/DPP6/ARHGEF16/VPS4A/MAP7/KIF13A/STAC2/EPHA2/STAC/ANK2/EGFR/ITGB1/ANK3/TNIK/WNT3A/GRIP1/KCNB1/F11R/SPTBN4/SQSTM1/GRASP/CNST/PKDCC/NFASC/TTC7B/CACNB2/RAB8B/TSPAN5/VAMP5/CDH2/PRKCE/BSG/DPP10/ZDHHC22/GAK/MYADM/ANXA2/PKP3/CIB1/KCNIP4/PTCH1/NHLRC1/S100A10/SMURF1/EMP2/SLC4A1/ITGA3/ATP2C2/FYB1/KRT18/PLS1…	75
GO:0014033	neural crest cell differentiation	34/812	3.75E-06	6.50E-05	4.48E-05	SOX8/ISL1/SEMA3C/MAPK3/SFRP1/PHOX2B/CORO1C/NRP2/TWIST1/BMP4/SOX9/ALDH1A2/EDNRB/NRG1/FGF19/PITX2/HAND2/SHH/RET/NOLC1/GBX2/GDNF/ZEB2/NRTN/FOXC2/SOX11/ALX1/TBX1/SEMA4B/SEMA4D/SEMA4A/PDCD6/SEMA4G/OVOL2	34
GO:0048675	axon extension	42/812	3.79E-06	6.54E-05	4.51E-05	SEMA3C/MAP2/HSP90AA1/MT3/POU4F3/NRCAM/DPYSL2/PTPRS/LHX2/DVL1/TNR/NRP2/LRP1/MACF1/MAP1B/DCLK1/NTRK3/BARHL2/SLIT2/PAK1/ITGB1/POU4F2/WNT3A/AUTS2/NKX6-1/RYK/ISLR2/DSCAM/ULK1/CDH4/SLIT3/SEMA4B/MAPT/SLIT1/SEMA4D/SEMA4A/BMPR2/PLXNA4/CYFIP1/SEMA4G/MAG/APOE	42
GO:0033627	cell adhesion mediated by integrin	28/812	3.80E-06	6.54E-05	4.51E-05	EPHA8/TESC/FERMT1/ITGA4/PODXL/ITGB4/ITGA11/CYP1B1/ITGB7/EPHA2/SFRP2/FERMT3/ITGB1/ITGB2/RET/FBN1/NPNT/FOXC2/CIB1/ITGBL1/LYN/ITGB3/ITGB8/NCKAP1L/EFNA1/P2RY12/MUC1/CD3E	28
GO:0045471	response to ethanol	43/812	3.82E-06	6.57E-05	4.52E-05	TBXA2R/CASP8/CLDN18/FGFR2/AACS/OPRK1/GSTP1/GATA3/APOBEC1/OPRM1/RGS4/CNR1/ITPR2/CDO1/CYP2E1/NTRK3/ADCYAP1/SLC6A3/CRHBP/GLRA1/STAR/CRH/DRD2/EPS8/ACTC1/VCAM1/NPPC/HPGD/CA3/KCNC2/TRH/PRKCE/LEP/GRIN1/NQO1/PENK/EIF4EBP1/GRIN3A/BGLAP/GRIN2B/SPI1/CYBB/UGT1A1	43
GO:0043542	endothelial cell migration	78/812	4.09E-06	7.02E-05	4.84E-05	PLXND1/TBXA2R/MAP2K3/FLT4/BCAR1/FGF4/FGFR1/FAP/PXN/ANGPT2/CARD10/LGMN/ANGPT4/MET/MEOX2/GATA3/HDAC5/NR2E1/SMOC2/FGF1/FOXP1/NRP2/GIPC1/EFNB2/BMP4/KDR/STARD13/CYP1B1/DNAJA4/CDH13/EPHA2/SLIT2/NOTCH1/ITGB1/VEGFC/ANGPT1/PRKCA/MIA3/ITGB2/BMPER/AMOTL1/GREM1/ROBO1/PLEKHG5/PTPRM/CLEC14A/FOXC2/EGR3/CCBE1/CIB1/SP1/SEMA4A/EPHB4/NF1/S100A2/MIR135B/MIR129-2/SOX18/BMPR2/MIR200A/MIR200B/MIR10B/MIR150/MIR196A2/MIR…	78
GO:0048286	lung alveolus development	20/812	4.15E-06	7.09E-05	4.89E-05	FLT4/FGFR2/FGF10/PGR/SMPD3/FOXF1/HOXA5/TCF21/BMP4/TNS3/NKX2-1/STRA6/PKDCC/LTBP3/STK40/BMPR2/LIF/FOXA1/ABCA12/SLC7A11	20
GO:0090102	cochlea development	23/812	4.38E-06	7.48E-05	5.15E-05	GLI2/PAX2/KCNK2/MYO3A/CALB1/HOXA1/DVL1/GATA3/SOBP/EPHA4/SOX9/ADAM10/NTRK3/GABRB2/GRHL3/GABRB3/KCNK3/NEUROG1/TBX1/GABRA5/PVALB/SLITRK6/TIFAB	23
GO:0046777	protein autophosphorylation	69/812	4.53E-06	7.71E-05	5.31E-05	FGR/VRK2/FLT4/TNK2/FGFR2/CAMK2A/EPHA8/STK10/FGFR1/PPP2R5C/MKNK1/NLK/MAPKAPK5/MYO3A/PTK6/HCK/STK24/FLT1/MAPK3/CSK/CAMKK2/GRK7/PASK/EPHA4/NEK6/FLT3/PRKCG/MAP2K2/KDR/PDGFRA/TAOK3/ACVR1B/GPNMB/IGF1R/SIK1/ABL2/PDGFC/EGFR/PAK1/VEGFC/THY1/TNIK/EPHB1/ACE/WNK2/GREM1/GFRA2/ALK/MOS/ULK1/ERN1/MAPK15/FES/CSF1R/MEX3B/EPHB4/SRC/NTRK1/STK39/GRK5/LYN/BTK/PTPRC/MAP4K1/ZAP70/NEK2/NLRP12/SLA/EPHB3	69
GO:0060706	cell differentiation involved in embryonic placenta development	15/812	4.65E-06	7.87E-05	5.42E-05	PRDM1/CASP8/STK3/MDFI/HAND1/SNAI1/ST14/EOMES/ASCL2/SOCS3/GRHL2/LIF/KRT8/KRT19/GJB5	15
GO:0060740	prostate gland epithelium morphogenesis	15/812	4.65E-06	7.87E-05	5.42E-05	FGFR2/FGF10/TP63/GLI2/ESR1/SFRP1/BMP4/SOX9/HOXD13/NOTCH1/HOXB13/SHH/ID4/RXRA/FOXA1	15
GO:0045667	regulation of osteoblast differentiation	43/812	4.83E-06	8.14E-05	5.61E-05	FGFR2/HDAC4/TP63/GNAS/SFRP1/HOXA2/GLI3/SUFU/TCIRG1/TWIST1/RUNX2/BMP4/TRPM4/SMAD6/FBN2/SFRP2/NOTCH1/BMP6/SKI/LRP5/NPPC/HAND2/NELL1/GREM1/SMAD3/AXIN2/NPNT/SOX11/FAM20C/CTNNBIP1/IFITM1/PTCH1/SEMA4D/SMOC1/BMPR2/CLIC1/GDF10/AREG/MSX2/ID1/TOB1/WNT7B/TNF	43
GO:0060441	epithelial tube branching involved in lung morphogenesis	16/812	4.95E-06	8.29E-05	5.71E-05	FGFR2/FGF10/CELSR1/LAMA1/FOXF1/HOXA5/BMP4/SOX9/SPRY2/NKX2-1/RSPO2/SPRY1/SHH/ESRP2/FOXA1/TNF	16
GO:0001101	response to acid chemical	93/812	4.96E-06	8.29E-05	5.71E-05	CYP26B1/CD38/ABCB4/CD9/ABCC2/EPHA3/F7/LTK/FGFR2/SREBF1/PAX2/AACS/GSTP1/NCOA1/AKR1B1/MMP2/TESC/CYP26A1/SCD/PTK6/ADNP2/SFRP1/HOXA2/CPEB3/COL1A1/FZD10/IGFBP2/WNT6/DUSP1/LRP11/FABP3/PTGFR/SOX9/CCR7/KDR/ALDH1A2/CDO1/SH3BP4/LDLR/CYP2E1/SESN2/PDGFRA/ASCL1/NTRK3/RPTOR/ABL2/OSR1/PDGFC/GLRA1/EGFR/FOXO1/ACSL1/BMP6/WNT3A/SST/CAPN2/GJB2/RET/AVPR1A/PTGDR/IRS1/PTAFR/PRKCE/LEP/LPL/BAIAP2/GRIN1/GLDC/NQO1/COL18A1/…	93
GO:0003176	aortic valve development	17/812	4.98E-06	8.29E-05	5.71E-05	TNFRSF1A/GATA3/TWIST1/SNAI1/BMP4/SOX9/GATA5/NFATC1/SMAD6/SLIT2/NOTCH1/HEYL/TBX20/ROBO1/SLIT3/BMPR2/EFNA1	17
GO:0003338	metanephros morphogenesis	17/812	4.98E-06	8.29E-05	5.71E-05	SOX8/FGF10/PAX2/SALL1/CALB1/BMP4/SOX9/PAX8/FRAS1/KIF26B/GDNF/BASP1/WT1/LHX1/LIF/FOXJ1/WNT7B	17
GO:0038128	ERBB2 signaling pathway	17/812	4.98E-06	8.29E-05	5.71E-05	MATK/PTPN18/HSP90AA1/PTK6/GAB1/EGF/EGFR/PTPRR/PRKCA/NRG1/NRG2/GRB2/SRC/ERBB3/EREG/GRB7/BTC	17
GO:0046850	regulation of bone remodeling	22/812	5.09E-06	8.44E-05	5.82E-05	CD38/SYT7/IL20RA/CLDN18/CSK/SFRP1/LEPR/TNFRSF11A/EGFR/ADAM8/PRKCA/CARTPT/GREM1/LTBP3/LEP/CSF1R/NF1/SRC/BGLAP/ITGB3/P2RX7/DCSTAMP	22
GO:0048557	embryonic digestive tract morphogenesis	12/812	5.21E-06	8.61E-05	5.93E-05	FGFR2/FGF10/FOXF1/GLI3/TCF21/PDGFRA/SHH/RBPMS2/SHOX2/SOX11/OVOL2/IHH	12
GO:0072079	nephron tubule formation	12/812	5.21E-06	8.61E-05	5.93E-05	SOX8/PAX2/GATA3/WNT6/SOX9/PAX8/OSR1/GDNF/IRX1/IRX2/IRX3/SIX4	12
GO:0071466	cellular response to xenobiotic stimulus	56/812	5.28E-06	8.70E-05	6.00E-05	CYP26B1/CFLAR/MGST1/FMO1/DPEP1/ABCC2/RORA/CYP2W1/GSTP1/DNMT3B/PTGS1/CYP26A1/HNF4A/CYP2C18/ALDH3A1/OPRM1/APOBEC3A/CDO1/CYP2E1/CYP1B1/EPHX1/NR1I2/CRHBP/EGFR/STAR/CRH/FOXO1/ACSL1/ADCY8/GJB2/UGT1A6/ARNT2/GRIN1/NQO1/SLC8A1/HSF1/SMYD3/EIF4EBP1/RYR1/CYP2B6/RYR2/RYR3/AKR7L/UGT1A10/AOC1/GSTO2/CYP3A5/AADAC/PCK1/CYP2C9/CYP3A4/AKR7A3/CMBL/AIF1/UGT1A1/UGT1A8	56
GO:0009612	response to mechanical stimulus	63/812	5.39E-06	8.86E-05	6.10E-05	COL11A1/CASP8/TNFRSF1A/HDAC4/KCNK2/SLC9A1/ANGPT2/NFKBIA/MAPK3/TRPA1/TNFRSF10A/COL1A1/NRXN2/KCNA1/IGFBP2/SLC2A1/PPL/LRP11/TNFRSF8/SOX9/IL1B/FOSB/KCNC1/KCNA5/PKDREJ/MAP1B/ATP8A2/RAC1/CASP1/STRA6/ACTA1/EGFR/DRD2/TMC2/BAG3/BMP6/ATP1A1/UCN/FOS/CNTNAP2/BNIP3/NRXN1/NEUROG1/SLC8A1/PTCH1/BACE1/SRC/HTT/NTRK1/RYR2/BGLAP/PTGS2/P2RX7/TLR8/MAG/PKD2L1/CHI3L1/SCEL/IHH/FOSL1/SLITRK6/TLR7/TIFAB	63
GO:0007219	Notch signaling pathway	59/812	5.55E-06	9.06E-05	6.24E-05	PLXND1/CREBBP/CNTN1/EPN1/FGF10/TP63/DLL3/NFKBIA/ANGPT4/ZNF423/ETV2/LFNG/ZMIZ1/DTX4/GMDS/WWC1/TBX2/NEUROD4/SNAI1/SOX9/HOXD3/KCNA5/GATA5/TRAF7/LLGL1/ADAM10/EGF/ASCL1/PSEN2/DLX1/EGFR/NOTCH1/GAS2/BEND6/SORBS2/HEYL/TSPAN5/ROBO1/ONECUT1/SUSD5/FOXC2/ZBTB7A/MAML2/DLK1/PBX1/DNER/NKAPL/FAT4/MAML3/WWP2/DLL1/RIPPLY2/NOTCH4/S1PR3/NEURL1B/PERP/FOXA1/ELF3/KRT19	59
GO:1901654	response to ketone	59/812	5.55E-06	9.06E-05	6.24E-05	CFLAR/CD38/ABCB4/TBXA2R/ABCC2/F7/SREBF1/AACS/NCOA1/AKR1B1/DNMT3B/SFRP1/XRN1/DUSP1/GHSR/PTGFR/CDKN1A/FOSB/NKX2-2/CCR7/HOXD13/EPO/ADCY3/ABHD2/NTRK3/PARP1/SLIT2/EGFR/STAR/CRH/FOXO1/ADCY8/HOXB13/ADCY1/GJB2/AVPR1A/PTGDR/UGT3A2/PTAFR/FOS/TRH/PRKCE/ADCY5/NPAS4/FIBIN/SLIT3/EFNA5/HSF1/SMYD3/EIF4EBP1/SRC/BGLAP/NEFL/MAP4K1/CA9/PCK1/CYBB/FOSL1/CLDN4	59
GO:0032835	glomerulus development	26/812	5.59E-06	9.11E-05	6.28E-05	CFLAR/WWTR1/PAX2/ANGPT2/NID1/TCF21/BMP4/PODXL/PDGFRA/PLCE1/OSR1/NOTCH1/KIRREL3/ANGPT1/MYO1E/HEYL/RET/BCL2/CD34/FOXC2/BASP1/WT1/MAGI2/LHX1/FOXJ1/PTPRO	26
GO:0030879	mammary gland development	47/812	5.78E-06	9.36E-05	6.45E-05	FGFR2/FGF10/GLI2/HOXA9/PGR/NCOA1/ESR1/FOXF1/HOXA5/GLI3/GATA3/SOCS2/TBX2/BMP4/SOX9/HOXD9/CDO1/TBX3/ELF5/EGF/TNFRSF11A/SLC6A3/EPHA2/WNT3A/NRG1/XDH/HK2/LRP5/MSX1/ROBO1/HOXB9/FOXB1/CSF1R/NRG3/PTCH1/BSX/NCOR2/SRC/APRT/NOTCH4/ATP2C2/AREG/IRF6/MSX2/ELF3/IQGAP3/WNT7B	47
GO:0048813	dendrite morphogenesis	47/812	5.78E-06	9.36E-05	6.45E-05	HECW1/SARM1/PREX2/CTNNA2/NGEF/CAMK2A/MAP2/CHRNA3/DNM1L/DVL1/CAPRIN2/CUX2/PHACTR1/NR2E1/TLX2/EPHA4/NEUROG3/BTBD3/DCLK1/DOCK10/ITPKA/ADAM10/RERE/ITGB1/FARP1/TNIK/EPHB1/TIAM1/SHANK1/SHANK2/SLITRK5/SDC2/CTNND2/DSCAM/KNDC1/FBXW8/BAIAP2/GRIN1/SEMA4D/SIPA1L1/DNM3/ARC/CUX1/SRCIN1/ID1/EFNA1/EPHB3	47
GO:0060525	prostate glandular acinus development	9/812	5.91E-06	9.56E-05	6.59E-05	FGFR2/TP63/ESR1/SFRP1/HOXD13/NOTCH1/HOXB13/RXRA/FOXA1	9
GO:0007369	gastrulation	57/812	6.09E-06	9.82E-05	6.76E-05	LAMA3/COL11A1/FGFR2/PAX2/FGFR1/ITGA8/MMP2/LAMB1/MMP9/HNF4A/FOXF1/SFRP1/ETV2/DVL1/FGF8/HAND1/ITGA4/TLX2/SNAI1/BMP4/COL5A1/ITGB4/KDM6B/COL4A2/ELF5/IL1RN/EPHA2/OSR1/SFRP2/CRB2/TBX6/HMGA2/ITGB1/WNT3A/ETS2/ITGB2/LRP5/TAL1/EOMES/TBX20/SOX17/OTX2/SMAD3/FOXC2/MYADM/EXT1/POFUT2/LAMB3/MIR1-1/BMPR2/TRIM15/MIR150/ITGB3/LHX1/HOXA11/ITGA3/FOXA2	57
GO:0022409	positive regulation of cell-cell adhesion	73/812	6.61E-06	0.000106173	7.32E-05	RUNX3/CD44/PTPRU/CBFB/GLI2/ITGA6/SMAD7/CORO1A/CSK/GLI3/DOCK8/GATA3/ZMIZ1/ZBTB16/CD5/IL23A/GCNT2/ITGA4/IGFBP2/IL1RL2/EFNB2/IL1B/CCR7/PODXL/EPO/VTCN1/HAVCR2/RAC1/MYO10/PAK1/IL18/ANK3/ADAM8/THY1/WNT3A/CD1D/RUNX1/ITGB2/PDPN/VCAM1/KIF26B/SHH/CCDC88B/PTAFR/LEP/GRB2/EGR3/PDCD1/SRC/ELANE/CARD11/LYN/PTPRC/CEACAM6/LILRB1/RASAL3/EBI3/CCL2/ZAP70/CCR2/SASH3/NCKAP1L/FOXA2/FOXA1/LILRB2/IHH/RASGRP1/CLECL1/BTLA/L…	73
GO:0021983	pituitary gland development	20/812	6.62E-06	0.000106173	7.32E-05	PAX6/ISL1/PITX1/FGF10/GLI2/SALL1/LHX3/FGF8/BMP4/ALDH1A2/NKX2-1/SIX3/ADCYAP1/SLC6A3/DRD2/MSX1/PITX2/GSX1/OTP/SOX3	20
GO:0051937	catecholamine transport	30/812	6.66E-06	0.000106371	7.33E-05	SYT7/SYT1/OPRK1/CHGA/HRH3/CHRNA4/SLC6A2/SYT10/CNR1/GHSR/SYT5/SYT6/SLC6A3/SNCA/SLC22A3/CRH/DRD2/KCNB1/UCN/CARTPT/SLC18A2/GDNF/MAPK15/NPY2R/SYT3/SYT13/STX1A/SYT8/RAB3B/P2RY12	30
GO:0046677	response to antibiotic	89/812	6.66E-06	0.000106371	7.33E-05	TBXA2R/CASP8/CLDN18/FGFR2/PAX2/HSP90AA1/AACS/OPRK1/GSTP1/GNAO1/SLC9A1/STK24/SMPD3/TRPA1/MET/GATA3/COL1A1/APOBEC1/OPRM1/XRN1/SDC1/RGS4/CNR1/DUSP1/ITPR2/CDO1/KCNA5/CYP2E1/KDM6B/ADCY3/CYP1B1/NTRK3/ADCYAP1/SLC6A3/CRHBP/GLRA1/STAR/CRH/LCN2/DRD2/FOXO1/EPS8/ADCY8/ACTC1/JAK1/ALPL/VCAM1/CAPN2/NPPC/HPGD/ADCY1/CA3/GJB2/KCNC2/GPR37/TRH/PRKCE/BCL2/ADCY5/LEP/BNIP3/GRIN1/NQO1/EHMT1/PENK/SLC8A1/EFNA5/HSF1/HYAL3/…	89
GO:0015711	organic anion transport	125/812	6.77E-06	0.000107845	7.43E-05	ABCB4/NOS2/SLC6A13/SLC7A14/SLC11A1/SLC7A9/ABCC2/SYT1/ATP11A/SLC6A15/RIMS1/NCOA1/SLC26A4/SLC17A6/SLC16A8/HRH3/NTSR1/SLC32A1/SLC7A5/OCA2/SLC17A7/PRKAG2/SLC2A9/SLC6A12/SLC27A6/PLSCR4/SCP2/RGS4/SLC2A1/SLC16A7/SLC25A2/ABCC11/FABP3/GIPC1/IL1B/LDLR/APOC1/ATP8B3/SLC27A1/SLC7A10/SLC6A6/RTBDN/SLC6A11/SNAP25/SSTR4/ATP8A2/SLC37A2/LRRC8A/SLCO5A1/STRA6/SLC13A5/SLC16A3/TNFRSF11A/PPFIA4/SLC10A4/SNCA/ANO7/DRD2/AC…	125
GO:0019233	sensory perception of pain	37/812	7.35E-06	0.000116736	8.04E-05	TAC1/OPRK1/SLC9A1/NTSR1/CHRNA4/MAPK3/TRPA1/GRIN2D/KCNA1/OPRM1/OPRD1/CNR1/HOXB8/HOXD1/PRDM12/ANO1/EDNRB/ADCYAP1/DLG2/GRM1/UCHL1/EPHB1/NPY1R/PTAFR/GRIN1/PENK/NPY2R/BACE1/CCK/NTRK1/PTGS2/P2RX7/CCL2/NMU/CCR2/SCN11A/ALOXE3	37
GO:0003158	endothelium development	44/812	7.53E-06	0.00011933	8.22E-05	COL23A1/TNFRSF1A/PTPRS/ETV2/MET/RAPGEF1/PDE4D/FGF1/FOXP1/TJP2/BMP4/IL1B/KDR/KDM6B/STARD13/SLC40A1/NOTCH1/ADAMTS12/BMP6/NRG1/XDH/F11R/PDPN/SOX17/CD34/FOXC2/MYADM/ANXA2/COL18A1/CLDN5/DLL1/MIR1-1/SOX18/BMPR2/NOTCH4/MIR150/S1PR3/CEACAM1/ID1/ITGAX/MARVELD2/F2RL1/WNT7B/TNF	44
GO:0003279	cardiac septum development	39/812	7.61E-06	0.000120204	8.28E-05	PLXND1/ISL1/PRDM1/FGFR2/SEMA3C/TBX5/TRIP11/SMAD7/SALL1/GATA3/FGF8/SUFU/HAND1/NRP2/TBX2/BMP4/PAX8/FGFRL1/TBX3/SMAD6/STRA6/LMO4/SLIT2/ANK2/NOTCH1/DHRS3/HEYL/TBX20/ROBO1/ZFPM2/SOX11/DAND5/ZFPM1/NKX2-5/TBX1/SLIT3/MIR1-1/BMPR2/MSX2	39
GO:0014066	regulation of phosphatidylinositol 3-kinase signaling	42/812	7.67E-06	0.000120862	8.33E-05	FGR/WNT16/FLT4/FGFR1/PPP2R5C/FLT1/MAPK3/TSC2/MAZ/GAB1/FLT3/TWIST1/STAMBP/SOX9/KDR/EPO/PDGFRA/CEP55/IGF1R/NTRK3/PIK3R5/PDGFC/EGFR/IL18/ANGPT1/PIK3CD/LEP/NTF3/SEMA4D/SRC/NTRK1/LIME1/LYN/ERBB3/CEACAM1/HCST/PIK3AP1/NCF1/F2RL1/RASGRP1/HCLS1/TNF	42
GO:0050772	positive regulation of axonogenesis	32/812	7.79E-06	0.000122421	8.44E-05	PLXND1/PLXNA2/PLXNA1/LRP1/MACF1/MAP1B/NGF/PLXNC1/SKIL/NTRK3/SLIT2/PAK1/POU4F2/WNT3A/CHODL/TIAM1/ISLR2/SHOX2/ZEB2/ROBO1/DSCAM/BDNF/SLITRK1/CDH4/EFNA5/MAPT/SEMA4D/BMPR2/PLXNA4/CYFIP1/NEFL/CRABP2	32
GO:0021511	spinal cord patterning	14/812	8.16E-06	0.00012797	8.82E-05	PAX6/DMRT3/GLI2/EVX1/GLI3/LHX3/SUFU/DBX1/RFX4/NKX2-2/ASCL1/NKX6-1/SHH/SOX1	14
GO:0042110	T cell activation	118/812	8.56E-06	0.000133906	9.23E-05	MAD1L1/CYP26B1/ITGAL/SLC11A1/RUNX3/NCAPH2/CD44/PRDM1/CASP8/CBFB/RORA/TBX21/GLI2/NFATC2/SMAD7/CORO1A/CSK/LFNG/GLI3/DOCK8/GATA3/ZMIZ1/ZBTB16/CD5/TCIRG1/IL23A/TREML2/CCR6/CCND3/FOXP1/IGFBP2/IL1RL2/LEPR/NKX2-3/MAPK8IP1/RUNX2/EFNB2/BMP4/IL1B/PAX1/CCR7/BCL11B/EPO/PTPN22/VTCN1/DOCK2/HAVCR2/GPNMB/RAC1/IRF4/PDE5A/PAK1/IL18/ADAM8/CD8A/THY1/SH3RF1/CD1D/RUNX1/VCAM1/EOMES/SHH/SMAD3/CCDC88B/PIK3CD/BCL2/IL20RB/…	118
GO:0001964	startle response	15/812	8.77E-06	0.000136166	9.38E-05	CTNNA2/GRIN2D/DVL1/KCNA1/SLC6A3/GLRA1/DRD2/UCN/GRIN1/NRXN1/PENK/CSMD1/BACE1/GRIN3A/SLITRK6	15
GO:0003148	outflow tract septum morphogenesis	15/812	8.77E-06	0.000136166	9.38E-05	ISL1/FGFR2/SEMA3C/FGF8/NRP2/TBX2/BMP4/SMAD6/TBX20/ROBO1/ZFPM2/NKX2-5/TBX1/BMPR2/MSX2	15
GO:0060384	innervation	15/812	8.77E-06	0.000136166	9.38E-05	ISL1/ITGA4/PRKCG/UNC13A/LRIG1/GABRB2/POU4F1/VCAM1/RET/GABRB3/GABRA5/COL25A1/NTRK1/SLITRK6/NTF4	15
GO:0008361	regulation of cell size	55/812	9.61E-06	0.000148446	0.000102287	FSTL4/SEMA3C/MAP2/MT3/NRCAM/DPYSL2/PTPRS/SLC12A7/TNR/LRP1/SLC12A5/MACF1/MAP1B/RAP1GAP2/VAV3/NGF/RAC1/LRRC8A/NTRK3/RPTOR/BARHL2/SLC12A9/PAK1/POU4F2/WNT3A/KCNMA1/VAV2/NKX6-1/RYK/UCN/RET/ISLR2/DSCAM/BDNF/CDH4/EFNA5/PRR16/SEMA4B/MAPT/DCC/SEMA4D/SEMA4A/BMPR2/PLXNA4/CYFIP1/XK/P2RX7/SEMA4G/KCNN4/MAG/PLEK/APOE/CRABP2/IQGAP3/KEL	55
GO:0048771	tissue remodeling	55/812	9.61E-06	0.000148446	0.000102287	WNT16/CD38/SYT7/IL20RA/FLT4/CLDN18/FGF10/SEMA3C/NOX4/MMP2/EFNA2/CSK/SFRP1/HOXA3/FGF8/TCIRG1/IL23A/THBS4/IL1A/LEPR/GPNMB/RAC1/TNFRSF11A/EPHA2/EGFR/IL18/ADAM8/PRKCA/LRRK1/ACE/ABR/LRP5/HAND2/CARTPT/GREM1/LTBP3/LEP/FOXC2/CSF1R/MITF/BSX/NF1/SRC/BMPR2/MIR34B/BGLAP/ITGB3/CEACAM1/SNX10/P2RX7/CCR2/LIF/ELF3/IHH/DCSTAMP	55
GO:0003018	vascular process in circulatory system	54/812	1.01E-05	0.000154987	0.000106794	CD38/TBXA2R/NOS1/CHGA/COMP/P2RX1/HRH2/ECE1/ADRA1A/DOCK4/KCNA5/TRPM4/MTNR1B/EDNRB/ADCYAP1/SLIT2/EGFR/DOCK5/HTR7/BMP6/DDAH1/ANGPT1/KCNMA1/ACE/ABR/NPPC/UCN/AVPR1A/MFSD2A/PTAFR/DRD5/ADRA1B/AZU1/PDE3A/PTPRM/LEP/FOXC2/HTR1A/CTNNBIP1/SLC8A1/PLA2G6/ADRB3/HRH1/SRC/BMPR2/PTGS2/CEACAM1/HMOX1/APOE/ACE2/F2RL1/ADORA2B/HTR1D/KEL	54
GO:0046849	bone remodeling	33/812	1.09E-05	0.000167037	0.000115097	WNT16/CD38/SYT7/IL20RA/CLDN18/NOX4/EFNA2/CSK/SFRP1/TCIRG1/LEPR/RAC1/TNFRSF11A/EPHA2/EGFR/ADAM8/PRKCA/LRRK1/LRP5/CARTPT/GREM1/LTBP3/LEP/CSF1R/MITF/NF1/SRC/BGLAP/ITGB3/SNX10/P2RX7/IHH/DCSTAMP	33
GO:0051924	regulation of calcium ion transport	72/812	1.11E-05	0.000169759	0.000116972	CAMK2A/GNAO1/REM1/NOS1/SLC9A1/JPH4/NTSR1/FGF14/CORO1A/HOMER2/P2RX1/STIM2/GRM6/PDE4D/STC2/GNAI2/OPRD1/RGS4/RAMP3/AHNAK/EPO/DYSF/EGF/STAC2/PSEN2/STAC/SNCA/ANK2/CRH/CACNA1B/DRD2/TMC2/CACNA1C/THY1/JPH3/UCN/CACNB2/STIM1/SLN/PRKCE/BCL2/GRIN1/ANXA2/SLC8A1/PLA2G6/PDE4B/P2RX2/HTT/RYR2/GJC2/MIR1-1/LIME1/TRIM27/LYN/ATP2C2/CD84/PTGS2/P2RX7/CEMIP/JPH1/LILRB1/CD33/CCL2/LILRB2/ATP1B1/CCR1/P2RY12/GRAMD2A/CRACR2B…	72
GO:0031214	biomineral tissue development	32/812	1.14E-05	0.000174361	0.000120143	FGR/SBNO2/FGFR2/SMPD3/COMP/MINPP1/COL1A1/TCIRG1/WNT6/TWIST1/BMP4/SOX9/TRPM4/KL/GPNMB/TFAP2A/FBN2/OSR1/RSPO2/NOTCH1/FOXO1/BMP6/ALPL/PKDCC/OSR2/NELL1/GREM1/SMAD3/STIM1/KLK4/LTBP3/AXIN2/PHOSPHO1/LEP/FAM20C/FAM83H/ANXA2/SLC8A1/TBX1/BMPR2/BGLAP/OC90/PTGS2/SNX10/P2RX7/MSX2/TUFT1/AHSG/CCR1/RFLNA/AMTN	51
GO:0110148	biomineralization	32/812	1.14E-05	0.000174361	0.000120143	FGR/SBNO2/FGFR2/SMPD3/COMP/MINPP1/COL1A1/TCIRG1/WNT6/TWIST1/BMP4/SOX9/TRPM4/KL/GPNMB/TFAP2A/FBN2/OSR1/RSPO2/NOTCH1/FOXO1/BMP6/ALPL/PKDCC/OSR2/NELL1/GREM1/SMAD3/STIM1/KLK4/LTBP3/AXIN2/PHOSPHO1/LEP/FAM20C/FAM83H/ANXA2/SLC8A1/TBX1/BMPR2/BGLAP/OC90/PTGS2/SNX10/P2RX7/MSX2/TUFT1/AHSG/CCR1/RFLNA/AMTN	51
GO:0009187	cyclic nucleotide metabolic process	19/812	1.18E-05	0.000178567	0.000123041	PDE4A/RORA/PDE4C/PDE10A/PDE8B/PDE4D/PDE1A/ADCY4/ADCY3/PDE5A/EPHA2/ADCY10/GUCY1A2/ADCY8/ADCY9/NPPC/ADCY1/ADCY5/PDE4B	19
GO:0072210	metanephric nephron development	19/812	1.18E-05	0.000178567	0.000123041	SOX8/TFAP2B/PAX2/SALL1/TCF21/BMP4/SOX9/PAX8/PDGFRA/OSR1/KIF26B/RET/GDNF/IRX1/IRX2/CD34/WT1/LHX1/LIF	19
GO:0045216	cell-cell junction organization	56/812	1.31E-05	0.000197772	0.000136275	CD9/PKP2/CBFB/MAP4K4/FSCN1/EPB41L3/SMAD7/CSK/SNAI1/KIFC3/CDH13/TBCD/EPHA2/IQSEC1/ANK2/CDH18/SDK1/CDH22/MPP7/CDH8/BMP6/PRKCA/FLCN/F11R/RUNX1/ACE/CADM3/NFASC/CLDN19/GJB2/RAB8B/PLEKHA7/SMAD3/CTNND2/CDH2/UGT8/CDH4/GPBAR1/CSF1R/CADM1/CLDN5/PKP3/SRC/MYO1C/ARL2/CDH17/GRHL2/PERP/ACE2/CRB3/MARVELD3/PTPRO/MARVELD2/F2RL1/GJB1/TNF	56
GO:0003156	regulation of animal organ formation	18/812	1.31E-05	0.000197772	0.000136275	ISL1/FGF10/FGFR1/TBX5/FGF8/FGF1/BMP4/GATA5/NOTCH1/WNT3A/SPRY1/HAND2/SHH/GDNF/ROBO1/WT1/HOXA11/HOXC11	18
GO:0071542	dopaminergic neuron differentiation	18/812	1.31E-05	0.000197772	0.000136275	SFRP1/FGF8/PITX3/PHOX2B/LMX1B/DMRTA2/SFRP2/RSPO2/WNT3A/TIAM1/LMX1A/EN1/RYK/SHH/PHOX2A/OTX2/FOXA2/FOXA1	18
GO:1905314	semi-lunar valve development	18/812	1.31E-05	0.000197772	0.000136275	TNFRSF1A/GATA3/TWIST1/SNAI1/BMP4/SOX9/GATA5/NFATC1/SMAD6/STRA6/SLIT2/NOTCH1/HEYL/TBX20/ROBO1/SLIT3/BMPR2/EFNA1	18
GO:0022407	regulation of cell-cell adhesion	104/812	1.33E-05	0.000198878	0.000137037	MAD1L1/CD9/RUNX3/CD44/PTPRU/CBFB/TBX21/GLI2/ITGA6/SMAD7/CORO1A/CSK/GLI3/DOCK8/GATA3/ZMIZ1/ZBTB16/CD5/IL23A/GCNT2/MDGA1/ITGA4/IGFBP2/IL1RL2/TNR/MAD2L2/EFNB2/BMP4/IL1B/CCR7/PODXL/EPO/PTPN22/VTCN1/HAVCR2/PCDH8/GPNMB/RAC1/IL1RN/PDE5A/ADAMTS18/MYO10/PAK1/FERMT3/IL18/ANK3/ADAM8/BMP6/THY1/PRKCA/MIA3/WNT3A/CD1D/RUNX1/ITGB2/PDPN/VCAM1/KIF26B/SHH/B4GALNT2/CCDC88B/PTAFR/IL20RB/LEP/GRB2/EGR3/MYADM/CLEC4G/EFN…	104
GO:0014068	positive regulation of phosphatidylinositol 3-kinase signaling	32/812	1.36E-05	0.000203504	0.000140224	FGR/WNT16/FLT4/FGFR1/FLT1/MAZ/GAB1/FLT3/SOX9/KDR/EPO/PDGFRA/IGF1R/NTRK3/PIK3R5/PDGFC/IL18/ANGPT1/PIK3CD/LEP/NTF3/SEMA4D/SRC/NTRK1/LYN/ERBB3/HCST/PIK3AP1/NCF1/F2RL1/HCLS1/TNF	32
GO:0001947	heart looping	25/812	1.37E-05	0.000203504	0.000140224	NDRG4/FGF8/SUFU/HAND1/TBX2/MICAL2/TBX3/LBX1/CCDC40/NOTCH1/TBX6/WNT3A/HAND2/TBX20/SHH/SOX17/SMAD3/NKX2-5/TBX1/DLL1/SOX18/NOTO/OVOL2/FOXH1/IHH	25
GO:0034113	heterotypic cell-cell adhesion	25/812	1.37E-05	0.000203504	0.000140224	CD44/PKP2/NRCAM/MADCAM1/GCNT2/ITGA4/CD58/IL1B/IL1RN/ITGB7/ITGB1/THY1/CD1D/ITGB2/VCAM1/NFASC/MYADM/ITGB3/PTPRC/CEACAM6/PERP/LILRB2/ITGAX/ITGAD/TNF	25
GO:0031128	developmental induction	17/812	1.44E-05	0.000213786	0.000147309	SOX8/FGF10/FGFR1/SALL1/FGF8/FGF1/BMP4/SOX9/GATA5/NKX2-1/SIX3/WNT3A/SPRY1/GDNF/ROBO1/HOXA11/HOXC11	17
GO:0032147	activation of protein kinase activity	89/812	1.44E-05	0.000213786	0.000147309	SPAG9/SLC11A1/MAP2K3/FGF10/MAP4K4/STK10/TP73/CHRNA3/MT3/MAPKAPK5/CARD10/ANGPT4/STK24/MAPK3/AXIN1/STK3/TNFRSF10A/PRKAG2/RAPGEF1/IL23A/FGF1/MAPKAP1/GRM4/BMP4/IL1B/MAP2K2/TRAF2/ADCY4/EPO/TRAF7/NGF/TAOK3/PAK6/ADCY3/PLCE1/EGF/MAPK8IP3/PDE6H/NTRK3/RPTOR/MAP3K6/PDGFC/EGFR/PAK1/DRD2/IL18/GRM1/ANGPT1/TNIK/ADCY8/NRG1/ADCY9/UCN/CARTPT/ADCY1/RET/GREM1/ALK/MOS/ADCY5/TLR6/LEP/ERN1/EFNA5/NTF3/NRG3/PRKAR1B/SRC/M…	89
GO:0050730	regulation of peptidyl-tyrosine phosphorylation	72/812	1.48E-05	0.000219401	0.000151178	ISL1/CNTN1/CD44/TNK2/TNFRSF1A/FGF10/NOX4/PTK6/ANGPT4/EHD4/SFRP1/FGF8/IL23A/THBS4/CBLB/EPHA4/ARHGEF2/ADRA1A/FLT3/EPO/SH3BP5/EGF/CBLC/SFRP2/PDGFC/TSLP/EGFR/IL18/BMP6/THY1/ANGPT1/LRRK1/WNT3A/NRG1/ACE/ITGB2/TAL1/IL22RA2/GREM1/GRM5/PRKCE/LEP/DOK7/BDNF/STAP2/CSF1R/EFNA5/SOCS3/HSF1/NTF3/CCK/SEMA4D/SRC/INPP5F/LYN/ITGB3/SRCIN1/GPRC5A/ERBB3/PTPRC/AREG/EREG/LIF/CD36/SAMSN1/NCF1/CD300A/EFNA1/HCLS1/ALKAL1/CD3…	72
GO:0003401	axis elongation	16/812	1.54E-05	0.00022679	0.000156269	FGFR2/FGF10/ESR1/SFRP1/FGF1/BMP4/SOX9/HOXD13/SPRY2/SFRP2/WNT3A/SPRY1/SHH/MAGI2/SIX4/AREG	16
GO:0050901	leukocyte tethering or rolling	14/812	1.56E-05	0.000228481	0.000157435	ADD2/MADCAM1/SELPLG/ITGA4/ITGB7/ITGB1/VCAM1/PTAFR/LEP/ELANE/CCR2/CX3CR1/SPN/TNF	14
GO:0051953	negative regulation of amine transport	14/812	1.56E-05	0.000228481	0.000157435	CHGA/HRH3/RGS4/CNR1/GHSR/SNCA/CRH/DRD2/UCN/NPY5R/TRH/LEP/GRM7/P2RY12	14
GO:0003180	aortic valve morphogenesis	15/812	1.58E-05	0.000232007	0.000159865	GATA3/TWIST1/SNAI1/BMP4/SOX9/GATA5/NFATC1/SMAD6/SLIT2/NOTCH1/HEYL/TBX20/ROBO1/SLIT3/EFNA1	15
GO:0035690	cellular response to drug	110/812	1.79E-05	0.000261926	0.00018048	CFLAR/NOS2/DPEP1/ABCC2/KCNQ1/KCNH2/PDE4A/PAX2/CHRNA3/NCOA1/MT3/GNAO1/GNAS/DNMT3B/PALM/HRH3/CHRNA4/MAPK3/SMPD3/SFRP1/MET/RECQL5/OPRM1/HRH2/XRN1/GNAI2/ARHGEF2/RGS4/ITPR2/MT2A/SOX9/IL1B/TRAF2/KDR/KCNC1/KLF16/TRPM4/DDC/KDM6B/PTPN22/ADCY3/CYP1B1/SLIT2/CRHBP/GLRA1/EGFR/STAR/CRH/LCN2/HTR7/RGS10/DRD2/HMGA2/FOXO1/ADCY8/GNAQ/HTR6/MSX1/RNF149/HTR4/ADCY1/FBP1/GJB2/KCNC2/PPP1R14A/UGT3A2/PTAFR/DRD5/GPR37/ALK/P…	110
GO:0045995	regulation of embryonic development	43/812	1.81E-05	0.000263582	0.000181622	LAMA3/CELSR1/FGFR1/HNF4A/LAMA1/SFRP1/STK3/LFNG/DVL1/GATA3/SUFU/LAMA4/TBX18/CDX1/TBX2/RBM19/SNAI1/BMP4/COL5A1/IL1RN/OSR1/SFRP2/CRB2/NOTCH1/WNT3A/GRHL3/B4GALT5/SHH/SOX17/OTX2/GDNF/DMRT2/NR2C2/MYADM/EHMT1/PHLDA2/DLL1/MIR1-1/TRAF3IP1/MIR150/LHX1/SIX4/FOXA2	43
GO:0072175	epithelial tube formation	43/812	1.81E-05	0.000263582	0.000181622	SOX8/FGFR2/FGF10/CELSR1/PAX2/KDM2B/TSC2/SFRP1/STK3/COBL/LHX2/DVL1/GATA3/FGF8/SUFU/HAND1/WNT6/TWIST1/BMP4/SOX9/PAX8/PODXL/SHROOM3/LMO4/OSR1/GDF7/SFRP2/ST14/SKI/GRHL3/RET/GDNF/ZEB2/IRX1/IRX2/SOX11/IRX3/ALX1/PTCH1/TRIM71/GRHL2/SIX4/OVOL2	43
GO:0060350	endochondral bone morphogenesis	28/812	1.89E-05	0.000272754	0.000187941	GNAS/TRIP11/SMPD3/IMPAD1/COMP/DLX5/COL1A1/MEF2D/MATN4/RUNX2/BMP4/SOX9/COL2A1/COL6A2/CSGALNACT1/BMP6/MMP16/ALPL/NPPC/VWA2/AXIN2/SHOX2/PHOSPHO1/ANXA2/COL14A1/BMPR2/HOXA11/IHH	28
GO:0030111	regulation of Wnt signaling pathway	95/812	1.89E-05	0.000272754	0.000187941	HECW1/ISL1/WWTR1/PSMA4/DKK3/CDK14/PTPRU/TLE2/FGFR2/CBFB/FGF10/NLK/ESR1/RSPO4/FERMT1/FGF9/AXIN1/TSC2/SALL1/SFRP1/DKK4/STK3/DLX5/GRB10/GLI3/RAPGEF1/DVL1/CCNY/RNF43/COL1A1/CAPRIN2/MDFI/TBX18/APC2/IGFBP2/MAD2L2/RECK/LRP1/SOX9/MACF1/TRPM4/NFATC1/KREMEN2/BARX1/SIX3/EGF/TLE3/IGFBP4/SFRP2/EGFR/RSPO2/NOTCH1/TCF7L2/FOXO1/TCF7L1/LRRK1/WNT3A/DKK2/GNAQ/WIF1/TIAM1/SKI/RUNX1/PSMD6/TERT/SHH/SOX17/WNK2/GREM1/SMAD…	95
GO:0014013	regulation of gliogenesis	41/812	1.89E-05	0.000272754	0.000187941	SOX8/TP73/PITX3/NR2E1/EPHA4/LRP1/IL1B/NKX2-2/LDLR/EMX1/NTRK3/ADCYAP1/DLX1/TTBK1/NOTCH1/TIAM1/SKI/SLC45A3/NKX6-1/TERT/SHH/CDH2/ID4/DAB1/SOX11/PLAG1/IDH2/ASCL2/NF1/GJC2/OLIG2/MIR125B1/LYN/MAG/CCR2/LIF/IL34/CX3CR1/P2RY12/TNF/ZNF488	41
GO:0009880	embryonic pattern specification	25/812	1.91E-05	0.000274896	0.000189417	FGFR2/FGF10/COBL/MEOX2/ZBTB16/NRP2/TBX3/SMAD6/PCSK6/TBX6/SIM2/SHH/SMAD3/HOXD8/BASP1/NEUROG1/WT1/PTCH1/DLL1/RIPPLY2/NOTO/LHX1/IHH/RIPPLY3/TIFAB	25
GO:0032623	interleukin-2 production	25/812	1.91E-05	0.000274896	0.000189417	SLC11A1/TBX21/HOMER2/GATA3/PDE4D/IL1A/SPTBN1/IL1B/TRAF2/VTCN1/HAVCR2/IRF4/IL18/RUNX1/CD34/IL20RB/PDE4B/IL1RAP/CARD11/TRIM27/PTPRC/CCR2/SASH3/CLEC7A/CD3E	25
GO:0016079	synaptic vesicle exocytosis	40/812	1.92E-05	0.000275009	0.000189495	SYT7/APBA2/SYT1/CAMK2A/RIMS1/DNM1L/STX1B/RIMS4/DNAJC5/CHRNA4/NAPA/DVL1/P2RX1/CNR1/ADRA1A/GIPC1/PRKCG/SYT5/UNC13A/SNAP25/SYT6/SNCA/CPLX2/DRD2/DGKI/ADCY1/CACNB2/PRKCB/PRRT2/CPLX1/RIMS2/CHRM2/BACE1/ERC2/GRIN3A/P2RX7/STX1A/SYT8/CHRNA5/ADORA2B	40
GO:0002065	columnar/cuboidal epithelial cell differentiation	38/812	1.95E-05	0.000279014	0.000192255	PAX6/PRDM1/FGFR2/TP63/FGFR1/POU4F3/HNF4A/PTK6/KLF5/HOXA5/AGR2/FGF8/NKX3-2/NPY/CDKN1A/BMP4/NKX2-2/GATA5/PYY/EMX1/MYO7A/ASCL1/NOTCH1/BMP6/NEUROD1/NKX6-1/CDH2/INSM1/SOX11/FAM20C/RXRA/DLL1/USH1C/ESRP1/SPDEF/FOXA1/PDX1/SLITRK6	38
GO:0032526	response to retinoic acid	37/812	1.95E-05	0.000279014	0.000192255	CYP26B1/CD38/EPHA3/LTK/FGFR2/SREBF1/PAX2/NCOA1/TESC/CYP26A1/PTK6/ADNP2/HOXA2/COL1A1/FZD10/IGFBP2/WNT6/DUSP1/SOX9/ALDH1A2/ASCL1/NTRK3/ABL2/OSR1/BMP6/WNT3A/GJB2/RET/LEP/TBX1/PTCH1/RXRA/GJB3/LYN/PCK1/WNT7B/BRINP2	37
GO:0014074	response to purine-containing compound	47/812	1.96E-05	0.000279014	0.000192255	KCNQ1/PTPRN/SREBF1/AACS/NOX4/DNMT3B/HCN2/AQP8/RAPGEF1/P2RX1/ALDH3A1/COL1A1/PANX1/XRN1/SDC1/DUSP1/ITPR2/IL1B/FOSB/VGF/CDO1/TRPM4/DUOX2/SLC6A3/CNGA3/CRHBP/STAR/SLC6A1/HCN1/PTAFR/FOS/BSG/PDE3A/KCNE1/PENK/SLC8A1/WT1/P2RX2/RYR1/RYR2/RYR3/PTGS2/P2RX7/AREG/PCK1/P2RY12/FOSL1	47
GO:0006814	sodium ion transport	63/812	1.99E-05	0.000283339	0.000195235	HECW1/CNTN1/PKP2/SLC9A3/TRPM5/SLC6A15/TESC/NOS1/FXYD3/SLC9A1/SLC17A6/HCN2/NKAIN4/SLC17A7/ATP4A/SCNN1A/FGF12/SLC5A7/SLC8A2/SGK1/WNK4/ATP1B2/TRPM4/SLC41A1/SLC24A4/SLC13A5/SIK1/OSR1/SLC10A4/DRD2/FXYD4/ANK3/GPD1L/SPTBN4/ATP1A1/HCN1/WNK2/NETO1/SLC38A8/SLC20A2/PRKCE/SLC9A4/SLC8A1/NKX2-5/NKAIN3/ATP4B/SCN8A/SLC34A3/STK39/FXYD7/SLC5A8/SCN4A/PRSS8/PTPN3/SLC4A11/P2RX7/PKD2L1/SLC9A2/SLC6A8/ATP1A4/KCNK1/ATP1B…	63
GO:0008038	neuron recognition	21/812	2.02E-05	0.00028609	0.000197131	CELSR3/EPHA3/NRCAM/CRTAC1/EPHA4/CNR1/PALLD/CNTN4/FEZF2/ROBO3/NCAM2/NEXN/ROBO1/DSCAM/BSG/CNTNAP2/DSCAML1/NTM/OPCML/VSTM2L/EPHB3	21
GO:0035050	embryonic heart tube development	29/812	2.03E-05	0.000286644	0.000197512	NDRG4/FGF8/SUFU/HAND1/TBX2/MICAL2/TBX3/LBX1/CCDC40/NOTCH1/TBX6/WNT3A/HAND2/TBX20/SHH/SOX17/SMAD3/FOXC2/NKX2-6/NKX2-5/TBX1/RYR2/DLL1/SOX18/TRAF3IP1/NOTO/OVOL2/FOXH1/IHH	29
GO:0007605	sensory perception of sound	46/812	2.03E-05	0.000286644	0.000197512	KCNQ1/COL11A1/FGFR1/POU4F3/SLC26A4/MYO3A/CRYM/HOMER2/MYH14/HOXA1/COL1A1/EYA4/SOBP/KCNQ4/EML2/PAX3/SPRY2/TFAP2A/MYO7A/COL2A1/SRRM4/ESPNL/LRIG1/GABRB2/TMC2/CNTN5/POU4F2/SPTBN4/UCN/GJB2/GABRB3/NAV2/KCNE1/TBX1/GABRA5/P2RX2/GRM7/COL11A2/USH1C/SLC52A3/CEMIP/MARVELD2/OTOA/TMPRSS3/MYO1A/SLITRK6	46
GO:0001701	in utero embryonic development	97/812	2.04E-05	0.000287506	0.000198106	SOX8/APBA2/PRDM1/EPN1/CASP8/FGFR2/ATP11A/PTPN18/GLI2/FGFR1/NCOA1/HM13/FOXF1/STK3/ELL/ETV2/GLI3/KDM4C/GATA3/ZMIZ1/SOX6/MDFI/HAND1/SLC5A7/PPP4R4/TWIST1/SNAI1/DSC3/PDGFRA/TBX3/ACVR1B/EMX1/NMT1/SKIL/LMX1B/ADAM10/CMTM3/ETNK2/GNA12/EGFR/PRDM14/NOTCH1/ST8SIA6/ST14/ITGB1/PTPRR/CMIP/ANGPT1/WNT3A/FLCN/ADAMTS3/MYO1E/HS3ST6/ADCY9/CAPN2/MSX1/EOMES/HAND2/SOX17/SMAD3/ANKRD11/NXN/TM4SF1/ZFPM2/CHST11/HOPX/ARNT2/H…	97
GO:0015893	drug transport	60/812	2.05E-05	0.000287815	0.000198319	SYT7/SLC11A1/ABCC2/SYT1/GAL/CHRNA3/OPRK1/HBQ1/SLC17A6/NTSR1/CHRNA4/SLC32A1/SLC7A5/SLC6A2/SLC17A7/SYT10/RGS4/CNR1/SLC25A2/GHSR/SYT5/SLC7A10/RTBDN/SYT6/TCN1/STRA6/SLC13A5/SLC6A3/SLC47A1/NR1I2/SNCA/SLC22A3/CRH/DRD2/UCN/SLC6A20/NGB/SLC18A2/SLC6A5/GALR1/GDNF/SLC25A22/MAPK15/NPY2R/SLC6A17/SLC44A4/HBM/SYT3/SLC5A8/SYT13/SLC4A11/SLC52A3/SLC6A8/SYT8/SLC7A11/AQP5/AMN/RAB3B/HBA2/HBA1	60
GO:0050731	positive regulation of peptidyl-tyrosine phosphorylation	57/812	2.07E-05	0.000290514	0.000200179	ISL1/CNTN1/CD44/TNK2/TNFRSF1A/FGF10/NOX4/PTK6/ANGPT4/EHD4/FGF8/IL23A/THBS4/EPHA4/ARHGEF2/ADRA1A/FLT3/EPO/EGF/TSLP/IL18/BMP6/ANGPT1/LRRK1/WNT3A/NRG1/ACE/TAL1/GREM1/GRM5/LEP/DOK7/BDNF/STAP2/CSF1R/EFNA5/SOCS3/HSF1/NTF3/CCK/SEMA4D/SRC/LYN/ITGB3/SRCIN1/ERBB3/PTPRC/AREG/EREG/LIF/CD36/NCF1/EFNA1/HCLS1/ALKAL1/CD3E/TNF	57
GO:0015800	acidic amino acid transport	26/812	2.14E-05	0.000298844	0.000205919	SYT1/RIMS1/SLC17A6/HRH3/NTSR1/SLC17A7/GIPC1/SNAP25/LRRC8A/PPFIA4/SNCA/SLC6A1/NPY5R/AVPR1A/CPLX1/TRH/LRRC8C/LRRC8D/SLC25A22/CCK/GRM7/NF1/P2RX7/STX1A/KMO/SLC7A11	26
GO:0017156	calcium-ion regulated exocytosis	26/812	2.14E-05	0.000298844	0.000205919	CACNA1G/BAIAP3/SYT7/SYT1/RIMS1/STX1B/CACNA1I/RIMS4/SYT10/GNAI2/SYT5/UNC13A/SYT6/NOTCH1/SYN2/KCNB1/CDK5R2/RIMS2/RPH3AL/HYAL3/CACNA1H/SYT3/SCIN/SYT13/STX1A/SYT8	26
GO:0002028	regulation of sodium ion transport	31/812	2.25E-05	0.000312879	0.000215589	HECW1/CNTN1/PKP2/TESC/NOS1/FXYD3/SLC9A1/NKAIN4/FGF12/WNK4/ATP1B2/SIK1/OSR1/DRD2/FXYD4/ANK3/GPD1L/SPTBN4/ATP1A1/WNK2/NETO1/PRKCE/SLC8A1/NKX2-5/NKAIN3/STK39/FXYD7/PRSS8/PTPN3/P2RX7/ATP1B1	31
GO:0048639	positive regulation of developmental growth	55/812	2.32E-05	0.000321905	0.000221808	CACNA2D2/FGFR2/SYT1/FGFR1/RIMS1/TBX5/FGF9/CACNG7/AGR2/FGF8/RASAL1/TBX2/GHSR/LRP1/MACF1/MYOD1/UNC13A/MAP1B/ATP8A2/NGF/NTRK3/SLC6A3/NOTCH1/PAK1/DRD2/POU4F2/WNT3A/SPTBN4/TBX20/ISLR2/ZFPM2/DSCAM/BCL2/LEP/SH3PXD2B/RIMS2/BDNF/BASP1/CDH4/EFNA5/WT1/HSF1/MAPT/SEMA4D/AGRN/ITSN2/DLL1/SMURF1/BMPR2/SYT3/ACTN3/CYFIP1/PLS1/SASH3/CRABP2	55
GO:0072091	regulation of stem cell proliferation	27/812	2.35E-05	0.000325669	0.000224403	PAX6/SIRT6/FERMT1/GLI3/NR2E1/TBX3/SIX3/DMRTA2/NOTCH1/VAX1/DRD2/HMGA2/VEGFC/ACE/TERT/SHH/SOX17/LTBP3/OTP/OVOL1/SOX11/NF1/SOX18/PTPRC/EPCAM/OVOL2/CX3CR1	27
GO:0051668	localization within membrane	33/812	2.39E-05	0.000330413	0.000227671	ITGAL/SEC31B/SAR1A/MADCAM1/SEC23B/CACNG7/DVL1/NRXN2/ITGA4/DOCK2/RAC1/ITGB7/CDH13/CACNG8/DLG2/THY1/MIA3/LHFPL4/ITGB2/GRIK2/CDH2/MAL/CNIH2/NRXN1/MAGI2/SHISA7/AGRN/SHISA6/CACNG3/PTPRC/APOE/ATP1B1/SLC7A11	33
GO:0032330	regulation of chondrocyte differentiation	22/812	2.45E-05	0.00033761	0.00023263	GLI2/GLI3/NKX3-2/ZBTB16/SOX6/EFEMP1/RUNX2/BMP4/SOX9/ADAMTS12/BMP6/GDF6/PKDCC/GREM1/SMAD3/LTBP3/AXIN2/SHOX2/ANXA2/HOXA11/SCIN/RFLNA	22
GO:2000179	positive regulation of neural precursor cell proliferation	22/812	2.45E-05	0.00033761	0.00023263	PAX6/GLI2/LHX5/GLI3/LHX2/PITX3/NR2E1/GNAI2/EGF/ASCL1/DMRTA2/NOTCH1/DRD2/VEGFC/WNT3A/SHH/OTP/INSM1/GJC2/LYN/LHX1/CX3CR1	22
GO:0061337	cardiac conduction	46/812	2.47E-05	0.00033854	0.000233271	CACNA1G/CACNA2D2/KCNQ1/KCNH2/PKP2/NOS1/FXYD3/SLC9A1/ITPR3/CACNG7/PDE4D/TNNI3K/SLC8A2/ITPR2/ATP1B2/KCNA5/CACNG6/TRPM4/CACNG8/CORIN/ANK2/FXYD4/CACNA2D4/CACNA1C/CACNA2D3/SPTBN4/NPPC/ATP1A1/CACNB2/STIM1/KCNK3/KCNE1/SLC8A1/NKX2-5/KCNJ12/KCNIP4/RYR1/RYR2/RYR3/MIR1-1/FXYD7/CACNG3/ACE2/ATP1A4/KCNK1/ATP1B1	46
GO:0043266	regulation of potassium ion transport	36/812	2.47E-05	0.00033854	0.000233271	KCNG1/KCNQ1/KCNH2/KCNAB2/GAL/ACTN2/OPRK1/NOS1/GCK/KCNA1/RGS4/KCNS1/WNK4/KCNC1/ATP1B2/KCNA5/DPP6/MTNR1B/ADCYAP1/ANK2/DRD2/ANK3/KCNS2/WNK2/KCNC2/NETO1/DPP10/KCNE1/GALR2/LRRC55/KCNIP4/WWP2/STK39/MIR1-1/ATP1B1/KEL	36
GO:0060602	branch elongation of an epithelium	12/812	2.50E-05	0.000341132	0.000235057	FGFR2/FGF10/ESR1/FGF1/BMP4/SOX9/HOXD13/SPRY2/SPRY1/SHH/SIX4/AREG	12
GO:0072234	metanephric nephron tubule development	12/812	2.50E-05	0.000341132	0.000235057	SOX8/WWTR1/ACAT1/PAX2/CALB1/SOX9/PAX8/OSR1/FAT4/POU3F3/LIF/WNT7B	12
GO:0038127	ERBB signaling pathway	45/812	2.56E-05	0.000348777	0.000240325	MATK/BCAR1/EPN1/PTPN18/DGKD/HSP90AA1/LGMN/MMP9/PTK6/ARHGEF7/AGR2/GAB1/CBLB/STAM2/EFEMP1/SOX9/IFI6/SPRY2/PLCE1/EGF/PDE6H/CDH13/CBLC/EGFR/FAM83A/PTPRR/PRKCA/NRG1/NRG2/SPRY1/GRB2/SLC30A10/SRC/GPRC5A/ERBB3/PTPN3/CEACAM1/AREG/EREG/GRB7/NCF1/FAM83B/SH3TC2/BTC/PDE6G	45
GO:0031646	positive regulation of nervous system process	25/812	2.65E-05	0.000359852	0.000247956	RIMS1/IGSF9B/STX1B/NTSR1/DVL1/CUX2/TNR/RGS4/MTNR1B/SHANK1/SHANK2/CARTPT/NETO1/PTAFR/BAIAP2/RIMS2/GRIN1/NRXN1/CCK/MAG/STX1A/NMU/MYRF/ITGAX/ZNF488	25
GO:0072347	response to anesthetic	29/812	2.69E-05	0.000364235	0.000250976	TAC1/F7/OPRK1/GNAO1/DNMT3B/HOMER2/PITX3/HDAC5/OPRM1/RGS4/CNR1/FOSB/PRKCG/SLC6A3/SNCA/CRHBP/SDK1/CRH/DRD2/HNMT/ADCY8/TIAM1/SLC6A1/DRD5/TACR3/PRKCE/GRIN1/PENK/AIF1	29
GO:2000300	regulation of synaptic vesicle exocytosis	29/812	2.69E-05	0.000364235	0.000250976	APBA2/SYT1/CAMK2A/RIMS1/DNM1L/STX1B/RIMS4/CHRNA4/NAPA/DVL1/P2RX1/CNR1/ADRA1A/GIPC1/PRKCG/CPLX2/DRD2/DGKI/ADCY1/CACNB2/PRKCB/CPLX1/RIMS2/CHRM2/BACE1/GRIN3A/STX1A/CHRNA5/ADORA2B	29
GO:1900181	negative regulation of protein localization to nucleus	15/812	2.75E-05	0.000371553	0.000256019	CLDN18/POLR1A/FERMT1/SUFU/DCLK1/TRIM29/MFHAS1/ANGPT1/FLCN/PKIG/DCLK2/NF1/CD36/LILRB4/TRIM40	15
GO:0001660	fever generation	8/812	2.78E-05	0.00037543	0.00025869	PTGER3/IL1A/CNR1/IL1B/EDNRB/TNFRSF11A/PTGS2/TNF	8
GO:0030279	negative regulation of ossification	30/812	2.82E-05	0.000379668	0.000261611	HDAC4/SFRP1/HOXA2/SUFU/TWIST1/SOX9/GFRA4/TRPM4/KREMEN2/SMAD6/NOTCH1/SKI/LRP5/HAND2/GREM1/SMAD3/LTBP3/AXIN2/BCL2/PTCH1/SEMA4D/SMURF1/GDF10/AREG/ID1/TOB1/AHSG/CCR1/RFLNA/TNF	30
GO:1903078	positive regulation of protein localization to plasma membrane	23/812	2.87E-05	0.000385335	0.000265515	EPHA3/SORBS1/ANXA13/CLIP3/AGR2/SPTBN1/RAMP3/LRP1/ARHGEF16/STAC2/EPHA2/STAC/EGFR/ITGB1/WNT3A/SQSTM1/CNST/PRKCE/DPP10/CIB1/ITGA3/PLS1/TNF	23
GO:0003143	embryonic heart tube morphogenesis	26/812	2.92E-05	0.00039026	0.000268909	NDRG4/FGF8/SUFU/HAND1/TBX2/MICAL2/TBX3/LBX1/CCDC40/NOTCH1/TBX6/WNT3A/HAND2/TBX20/SHH/SOX17/SMAD3/NKX2-5/TBX1/RYR2/DLL1/SOX18/NOTO/OVOL2/FOXH1/IHH	26
GO:0061371	determination of heart left/right asymmetry	26/812	2.92E-05	0.00039026	0.000268909	NDRG4/FGF8/SUFU/HAND1/TBX2/MICAL2/TBX3/LBX1/CCDC40/NOTCH1/TBX6/WNT3A/HAND2/TBX20/SHH/SOX17/SMAD3/DAND5/NKX2-5/TBX1/DLL1/SOX18/NOTO/OVOL2/FOXH1/IHH	26
GO:0006029	proteoglycan metabolic process	33/812	3.07E-05	0.000409115	0.000281901	EXTL3/COL11A1/GPC1/XYLT1/IMPAD1/B3GAT1/UST/HS3ST2/CHST8/HS3ST3B1/IDUA/NCAN/BCAN/CHST12/COL2A1/CSGALNACT1/TCF7L2/ADAMTS12/ACAN/HS3ST6/EGFLAM/CYTL1/CANT1/CHST11/GAL3ST3/CHST15/EXT1/HS6ST3/BMPR2/IHH/NDNF/FOXL1/HS3ST5	33
GO:0006939	smooth muscle contraction	37/812	3.09E-05	0.000411879	0.000283806	CD38/TBXA2R/PTGER3/CHRNA3/COMP/P2RX1/PDE4D/TACR1/ADRA1A/GHSR/DOCK4/MYH11/EDNRB/PLCE1/DOCK5/HTR7/DRD2/KCNMA1/TPCN2/GDNF/NPNT/PTAFR/TACR3/ADRA1B/SSTR2/CHRM2/NEUROG1/SLC8A1/SETD3/PLA2G6/NPY2R/P2RX2/PTGS2/NMU/ADORA2B/HTR1D/TIFAB	37
GO:0044344	cellular response to fibroblast growth factor stimulus	45/812	3.11E-05	0.000412949	0.000284543	CD44/GPC1/FGFR2/FGF10/FGF22/FGF4/FGFR1/FGF9/MAPK3/SFRP1/GATA3/FGF8/COL1A1/SMOC2/FGF1/FGF12/RUNX2/FGFRL1/KL/SPRY2/FGF5/SNCA/STAR/PRDM14/CREB3L1/FGF19/SPRY1/OTX2/HNRNPF/SHCBP1/FAM20C/GRB2/EGR3/TBX1/FLRT2/FGF3/SPRY4/FAT4/MIR1-1/TRIM71/LHX1/ESRP2/ESRP1/CCL2/FGFBP1	45
GO:0043647	inositol phosphate metabolic process	27/812	3.16E-05	0.000419095	0.000288778	MTMR7/INPP5A/IP6K2/SYNJ2/MTMR2/ITPK1/NTSR1/MINPP1/ITPKA/PLCB2/LHCGR/PLCE1/SNCA/PLCH2/PLCB3/INPP1/PLCL2/PTAFR/NUDT4/GALR2/PLCD1/HRH1/PLCH1/PLEK/CD244/PLCD3/PLD4	27
GO:0007265	Ras protein signal transduction	112/812	3.18E-05	0.000420822	0.000289968	TRIO/PREX2/USP28/RASGRF1/PSD/NGEF/RASSF1/FGF10/MAP4K4/ARHGEF10L/CELSR1/PLD1/ARHGEF1/MAPKAPK5/ARHGEF7/ARHGEF10/ARHGEF18/RASIP1/MET/RAPGEF1/ARHGEF17/KCTD10/RASAL1/RASGRF2/ARHGEF2/TRIM67/MAPKAP1/ADRA1A/STAMBP/CDKN1A/MCF2L/EPO/ARHGEF16/VAV3/NGF/ARHGEF4/SPRY2/RAC1/MMD2/PLCE1/RHOF/CDH13/KSR1/RAB40B/ARHGEF19/ABL2/IQSEC1/RASA1/TIAM2/GNA12/DOK2/NOTCH1/ITGB1/EPS8/FARP1/OBSCN/FGD5/FLCN/ELMO1/PSD3/TIAM1/NRG1…	112
GO:2000648	positive regulation of stem cell proliferation	18/812	3.25E-05	0.000429014	0.000295612	PAX6/SIRT6/GLI3/NR2E1/TBX3/DMRTA2/NOTCH1/DRD2/HMGA2/VEGFC/TERT/SHH/LTBP3/OTP/SOX11/PTPRC/EPCAM/CX3CR1	18
GO:0010469	regulation of signaling receptor activity	32/812	3.41E-05	0.000448775	0.000309229	DKK3/RASGRF1/ACTN2/DKK4/CACNG7/NPTX2/OPRM1/PDE4D/CBLB/CNRIP1/GRIA2/RAMP3/SLURP1/EGF/CBLC/CACNG8/CNIH3/MUC4/CRHBP/CRH/ITGB1/DLG2/GRIA4/DKK2/LY6E/SHANK1/SHANK2/TAL1/NETO1/GREM1/GSG1L/CNIH2/GRIN1/LY6H/PHLDA2/SHISA7/SHISA6/SRC/ARC/SHISA9/GRIN2B/NEFL/CACNG3/GPRC5A/FCGR2B/CCL2/CCR2/EREG/NCF1/PSCA/CLEC12B	51
GO:0002067	glandular epithelial cell differentiation	20/812	3.53E-05	0.000463254	0.000319205	PAX6/FGFR2/TP63/HNF4A/HOXA5/AGR2/FGF8/BMP4/NKX2-2/ASCL1/NOTCH1/BMP6/NEUROD1/NKX6-1/INSM1/RXRA/DLL1/SPDEF/FOXA1/PDX1	20
GO:0002673	regulation of acute inflammatory response	20/812	3.53E-05	0.000463254	0.000319205	TAC1/PTGER3/GSTP1/CNR1/IL1B/CCR7/EDNRB/ADCYAP1/TNFRSF11A/OSMR/ADAM8/NPY5R/IL20RB/DNASE1/BTK/FCGR2B/PTGS2/F12/DNASE1L3/TNF	20
GO:0050954	sensory perception of mechanical stimulus	50/812	3.59E-05	0.000469562	0.000323552	KCNQ1/COL11A1/FGFR1/POU4F3/SLC26A4/MYO3A/CRYM/HOMER2/TRPA1/MYH14/HOXA1/COL1A1/KCNA1/EYA4/SOBP/KCNQ4/EML2/PAX3/SPRY2/TFAP2A/MYO7A/COL2A1/SRRM4/ESPNL/LRIG1/GABRB2/TMC2/CNTN5/POU4F2/SPTBN4/UCN/GJB2/GABRB3/NAV2/KCNE1/TBX1/GABRA5/BACE1/P2RX2/GRM7/NTRK1/COL11A2/USH1C/SLC52A3/CEMIP/MARVELD2/OTOA/TMPRSS3/MYO1A/SLITRK6	50
GO:0035148	tube formation	46/812	3.61E-05	0.000471677	0.000325009	SOX8/FGFR2/FGF10/CELSR1/PAX2/KDM2B/TSC2/SFRP1/STK3/HOXA1/COBL/LHX2/DVL1/GATA3/FGF8/SUFU/HAND1/WNT6/TWIST1/BMP4/SOX9/PAX8/PODXL/SHROOM3/LMO4/OSR1/GDF7/SFRP2/NOTCH1/ST14/SKI/GRHL3/SHH/RET/GDNF/ZEB2/IRX1/IRX2/SOX11/IRX3/ALX1/PTCH1/TRIM71/GRHL2/SIX4/OVOL2	46
GO:0035418	protein localization to synapse	30/812	3.69E-05	0.000480492	0.000331083	STX1B/CACNG7/DVL1/NRXN2/KIF17/GHSR/TERF2/SNAP25/ADAM10/MAPK8IP3/CACNG8/DLG2/GRIP1/GRIN2C/SHANK1/GRASP/NETO1/KIF5C/CPLX1/CLSTN1/HRAS/CNIH2/BAIAP2/GRIN1/NRXN1/GPC6/ANKS1B/MAPT/SHISA6/CACNG3	30
GO:0030217	T cell differentiation	67/812	3.72E-05	0.000484327	0.000333726	CYP26B1/RUNX3/NCAPH2/PRDM1/CBFB/RORA/TBX21/GLI2/NFATC2/SMAD7/LFNG/GLI3/GATA3/ZMIZ1/ZBTB16/TCIRG1/IL23A/CCR6/FOXP1/IL1RL2/LEPR/NKX2-3/RUNX2/BMP4/PAX1/CCR7/BCL11B/PTPN22/DOCK2/IRF4/IL18/ADAM8/CD8A/SH3RF1/CD1D/RUNX1/EOMES/SHH/PIK3CD/BCL2/LEP/EGR3/ZFPM1/SEMA4A/CARD11/MAFB/PTPRC/TNFSF8/ZAP70/TMEM131L/CCR2/SASH3/NCKAP1L/GPR18/FOXJ1/LILRB2/SPINK5/CD3G/IHH/CLEC4E/CLEC4D/RASGRP1/THEMIS/LILRB4/SPN/CD3E/CR1	67
GO:0022037	metencephalon development	37/812	3.87E-05	0.000502038	0.000345929	CNTN1/SEZ6/RORA/GLI2/NCOA1/LHX5/CBLN1/PTPRS/HOXB1/KCNC1/FAIM2/ASCL1/RERE/PAK1/KLHL1/LMX1A/NEUROD1/EN1/PHOX2A/PTF1A/GBX2/CDK5R2/NEUROD2/BCL2/KNDC1/DAB1/GRIN1/SSTR2/CEND1/DLL1/LHX1/FCGR2B/OTX1/SSTR1/CD3E/AIF1/TRNP1	37
GO:0035725	sodium ion transmembrane transport	44/812	3.92E-05	0.000507507	0.000349698	HECW1/SLC9A3/TRPM5/TESC/NOS1/FXYD3/SLC9A1/HCN2/SLC17A7/ATP4A/SCNN1A/FGF12/SLC8A2/WNK4/ATP1B2/TRPM4/SLC41A1/SLC24A4/OSR1/FXYD4/ANK3/GPD1L/ATP1A1/HCN1/WNK2/NETO1/SLC20A2/PRKCE/SLC9A4/SLC8A1/ATP4B/SCN8A/SLC34A3/STK39/FXYD7/SCN4A/PTPN3/SLC4A11/PKD2L1/SLC9A2/ATP1A4/KCNK1/ATP1B1/SCN11A	44
GO:0003407	neural retina development	26/812	3.95E-05	0.000510093	0.00035148	SOX8/TFAP2B/VSX1/CALB1/SLC17A7/NEUROD4/SOX9/RAB11FIP4/ATP8A2/TFAP2A/SIX3/DLX1/SDK1/POU4F2/THY1/MEGF11/NEUROD1/HCN1/PTF1A/DSCAM/PTPRM/IRX5/FJX1/LHX1/USH1C/IHH	26
GO:0030509	BMP signaling pathway	48/812	3.96E-05	0.00051107	0.000352153	TFAP2B/SMAD7/MAPK3/ZNF423/SMPD3/SFRP1/AMH/COMP/ETV2/DLX5/FGF8/RUNX2/BMP4/SKIL/SORL1/SMAD6/PCSK6/GDF7/DLX1/SFRP2/CRB2/NOTCH1/BMP6/GDF6/SKI/MSX1/BMPER/HTRA1/FBN1/RBPMS2/GREM1/RGMB/SOX11/DAND5/RGMA/NKX2-5/TMPRSS6/VWC2/MYH6/RYR2/SMURF1/BMPR2/ITGA3/MSX2/ID1/GDF15/AMHR2/TOB1	48
GO:0006022	aminoglycan metabolic process	32/812	4.05E-05	0.000521516	0.000359351	PGLYRP1/EXTL3/CD44/GPC1/SLC9A1/SMPD3/XYLT1/IMPAD1/HAS1/B3GAT1/GCNT2/UST/SDC1/HS3ST2/ITIH5/HS3ST3B1/IL1B/IDUA/NCAN/BCAN/CHST12/EGF/KERA/CSGALNACT1/ANGPT1/ACAN/B4GALT5/PGLYRP2/HS3ST6/EGFLAM/SDC2/CHST11/HPSE2/CHST2/GAL3ST3/B3GNT8/GPC5/CHST15/EXT1/GPC6/HYAL3/AGRN/B3GNT9/CEMIP/CHIT1/STAB2/GALNT5/PGLYRP4/NDNF/B3GNT3/HS3ST5	51
GO:0014072	response to isoquinoline alkaloid	16/812	4.19E-05	0.000537052	0.000370056	TAC1/OPRK1/GNAO1/PITX3/OPRM1/RGS4/CNR1/FOSB/PRKCG/DRD2/ADCY8/TACR3/PRKCE/GRIN1/PENK/AIF1	16
GO:0043278	response to morphine	16/812	4.19E-05	0.000537052	0.000370056	TAC1/OPRK1/GNAO1/PITX3/OPRM1/RGS4/CNR1/FOSB/PRKCG/DRD2/ADCY8/TACR3/PRKCE/GRIN1/PENK/AIF1	16
GO:0017158	regulation of calcium ion-dependent exocytosis	19/812	4.20E-05	0.000537152	0.000370125	CACNA1G/BAIAP3/SYT7/SYT1/CACNA1I/SYT10/GNAI2/SYT5/SYT6/NOTCH1/KCNB1/CDK5R2/RPH3AL/HYAL3/CACNA1H/SYT3/SYT13/STX1A/SYT8	19
GO:0050805	negative regulation of synaptic transmission	27/812	4.22E-05	0.000539164	0.000371511	CD38/MTMR2/CBLN1/GNAI2/TNR/PCDH17/IL1B/SNCA/DRD2/ADCY8/SORCS3/SLC6A1/DGKI/KCNB1/SHANK2/GRIK3/NPY5R/GRIK2/DRD5/PLA2G6/SORCS2/NPY2R/MAPT/NF1/ARC/PTGS2/LILRB2	27
GO:0042593	glucose homeostasis	67/812	4.29E-05	0.000546517	0.000376578	PAX6/BAIAP3/NADK/TFAP2B/MLXIPL/PTPRN/MAP4K4/PAX2/SIRT6/AACS/OPRK1/NOX4/HNF4A/PIK3R2/GCK/POMC/LEPR/CNR1/LRP1/VGF/TRPM4/SESN2/ANO1/MTNR1B/RAC1/IGF1R/EPHA5/STAR/CRH/TCF7L2/FOXO1/PTPRN2/SLC16A1/ADCY8/TIAM1/HKDC1/KCNB1/HK2/LRP5/NEUROD1/CARTPT/FOXK1/CYP7A1/IRS1/ASPSCR1/ADRA1B/PRKCE/ADCY5/BRSK2/LEP/ERN1/BHLHA15/RPH3AL/ZBTB20/CSMD1/EFNA5/PLA2G6/PTCH1/NMB/PPP1R3G/PCK1/FOXA2/FOXA1/HNF1A/PDX1/HK3/FOXA3	67
GO:0010832	negative regulation of myotube differentiation	11/812	4.35E-05	0.000552805	0.000380911	CFLAR/HDAC4/HDAC5/NOTCH1/ANKRD2/BDNF/TRIM72/BHLHA15/NKX2-5/MIR200B/CEACAM5	11
GO:0042310	vasoconstriction	28/812	4.46E-05	0.000564115	0.000388703	CD38/TBXA2R/COMP/P2RX1/HRH2/ECE1/ADRA1A/DOCK4/KCNA5/TRPM4/EDNRB/EGFR/DOCK5/HTR7/ACE/AVPR1A/PTAFR/DRD5/ADRA1B/LEP/HTR1A/SLC8A1/HRH1/BMPR2/PTGS2/ACE2/HTR1D/KEL	28
GO:0060411	cardiac septum morphogenesis	28/812	4.46E-05	0.000564115	0.000388703	ISL1/FGFR2/SEMA3C/TBX5/SMAD7/FGF8/HAND1/NRP2/TBX2/BMP4/FGFRL1/TBX3/SMAD6/SLIT2/NOTCH1/DHRS3/HEYL/TBX20/ROBO1/ZFPM2/SOX11/ZFPM1/NKX2-5/TBX1/SLIT3/MIR1-1/BMPR2/MSX2	28
GO:0032370	positive regulation of lipid transport	24/812	4.50E-05	0.000568337	0.000391613	ABCB4/TAC1/GAL/NFKBIA/NTSR1/LIPG/SCP2/FABP3/LRP1/IL1B/SSTR4/ATP8A2/TNFRSF11A/CRH/BMP6/UCN/GALR1/ANXA2/PLA2G6/PTCH1/PLA2G10/P2RX7/APOE/ABCA12	24
GO:0071559	response to transforming growth factor beta	70/812	4.56E-05	0.000575206	0.000396346	CFLAR/CREBBP/RUNX3/DKK3/FGFR2/ITGA8/NOX4/NLK/PXN/LTBP4/FERMT1/SMAD7/SFRP1/ARHGEF18/COL1A1/SNX25/SOX6/GCNT2/GIPC1/PMEPA1/SOX9/RASL11B/COL4A2/ACVR1B/NKX2-1/SKIL/SMAD6/FBN2/ZFHX3/PRDM16/CGN/PARP1/DLX1/STAR/FLCN/SKI/F11R/ZYX/HPGD/HTRA1/FBN1/SMAD3/LTBP3/NPNT/ONECUT1/FOS/CHST11/PDE3A/CIDEA/SOX11/ZBTB7A/DAND5/PENK/CLDN5/WWOX/SRC/ADAMTSL2/SMURF1/BMPR2/GDF10/ITGA3/ONECUT2/OVOL2/ID1/GDF15/AMHR2/LEFTY2/FOXH…	70
GO:0006721	terpenoid metabolic process	39/812	4.61E-05	0.000576971	0.000397562	CYP26B1/GPC1/AKR1B1/CYP26A1/RARRES2/CYP2C18/RBP1/SDC1/LRP1/ALDH1A2/CYP2E1/STRA6/CYP1B1/EGFR/STAR/CRH/NAPEPLD/DHRS3/PLB1/CRABP1/SDC2/SDR16C5/LPL/GPC5/GPC6/AGRN/BCO2/CYP3A5/APOE/HMGCS2/BCO1/CYP2C9/CRABP2/CYP3A4/AKR1B10/AKR1C4/AKR1B15/UGT1A1/UGT1A8	39
GO:0021772	olfactory bulb development	15/812	4.61E-05	0.000576971	0.000397562	CRTAC1/EFNA2/SALL1/DLX5/LHX2/NR2E1/FEZF1/SLIT2/SKI/EOMES/UNCX/ROBO1/EXT1/CSF1R/SALL3	15
GO:0032743	positive regulation of interleukin-2 production	15/812	4.61E-05	0.000576971	0.000397562	PDE4D/IL1A/SPTBN1/IL1B/TRAF2/VTCN1/IRF4/RUNX1/PDE4B/CARD11/PTPRC/CCR2/SASH3/CLEC7A/CD3E	15
GO:0048265	response to pain	15/812	4.61E-05	0.000576971	0.000397562	TAC1/SLC6A2/TRPA1/THBS4/TACR1/PRKCG/EDNRB/CRH/CACNA1B/CAPN2/UCN/RET/LPAR5/P2RX2/NTRK1	15
GO:0097061	dendritic spine organization	29/812	4.64E-05	0.000579523	0.000399321	NGEF/MTMR2/DNM1L/LGMN/DVL1/CAPRIN2/CUX2/EPHA4/DOCK10/ITPKA/ADAM10/IGF1R/EPHB1/TIAM1/SHANK1/SHANK2/CTNND2/BAIAP2/SIPA1L1/DNM3/ARC/GRIN2B/SRCIN1/ITGA3/FCGR2B/APOE/EFNA1/ZNF804A/EPHB3	29
GO:0019933	cAMP-mediated signaling	54/812	4.77E-05	0.000593795	0.000409155	TBXA2R/PTGER3/PDE4A/GAL/GNAS/NOS1/CHGA/MGRN1/OPRM1/PDE10A/PDE4D/GNAI2/PEX5L/ADRA1A/PTGFR/RAMP3/SOX9/ADCY4/SSTR4/ADCY3/LHCGR/KSR1/GNAL/ADCYAP1/EPHA5/CRH/DRD2/GPHA2/PRKCA/GPR26/GPR78/ADCY8/GNAQ/ADCY9/UCN/ADCY1/GALR1/DRD5/ADRA1B/ADRA1D/PDE3A/ADCY5/RIMS2/GALR2/NPY2R/ADRB3/MIR1-1/ADGRE2/PDE11A/ADGRE3/GPR65/ADGRF1/ADORA2B/ADGRE1	54
GO:0050679	positive regulation of epithelial cell proliferation	59/812	4.78E-05	0.000593795	0.000409155	CFLAR/CCL26/FLT4/PTPRN/FGFR2/FGF10/TP63/PAX2/SIRT6/FGFR1/LAMB1/TGM1/FGF9/SFRP1/DLX5/THBS4/FGF1/ITGA4/F3/NRP2/GHSR/TWIST1/BMP4/SOX9/KDR/DYSF/CDH13/RPTOR/OSR1/EGFR/NOTCH1/TCF7L2/VEGFC/BMP6/PRKCA/WNT3A/SHH/OSR2/HTRA1/HRAS/SOX11/EGR3/TBX1/SP1/NF1/MIR135B/BMPR2/MIR10B/PDCD6/ITGB3/HMOX1/ESRP2/AREG/ID1/FGFBP1/IHH/SCG2/IQGAP3/MMP12	59
GO:0043279	response to alkaloid	37/812	4.81E-05	0.000597506	0.000411712	TAC1/OPRK1/GNAO1/DNMT3B/HOMER2/PITX3/RECQL5/HDAC5/DHX15/OPRM1/RGS4/CNR1/FOSB/PRKCG/DDC/SLC6A3/SNCA/CRHBP/SDK1/STAR/CRH/DRD2/HNMT/ADCY8/TIAM1/SLC6A1/DRD5/TACR3/PRKCE/GRIN1/PENK/SLC8A1/RYR1/RYR2/RYR3/PDX1/AIF1	37
GO:0034103	regulation of tissue remodeling	31/812	4.89E-05	0.000604511	0.000416538	CD38/SYT7/IL20RA/FLT4/CLDN18/CSK/SFRP1/IL23A/THBS4/LEPR/GPNMB/TNFRSF11A/EGFR/IL18/ADAM8/PRKCA/ABR/HAND2/CARTPT/GREM1/LTBP3/LEP/CSF1R/NF1/SRC/MIR34B/BGLAP/ITGB3/CEACAM1/P2RX7/DCSTAMP	31
GO:0031290	retinal ganglion cell axon guidance	12/812	4.90E-05	0.000604511	0.000416538	ISL1/POU4F3/NRCAM/SLIT2/POU4F2/EPHB1/ISL2/PTPRM/EFNA5/SLIT1/PTPRO/EPHB3	12
GO:0030595	leukocyte chemotaxis	63/812	4.92E-05	0.000604511	0.000416538	CCL26/F7/LGMN/CHGA/FLT1/CORO1A/MAPK3/RARRES2/IL23A/CCR6/THBS4/PDE4D/DUSP1/IL1B/CCR7/TRPM4/VAV3/DYSF/EDNRB/RAC1/IL1RN/ADAM10/CH25H/TNFRSF11A/ITGA9/SLIT2/VEGFC/ADAM8/ITGB2/CXCR5/CXCR1/GREM1/PIK3CD/C3AR1/AZU1/CAMK1D/PDE4B/HRH1/STK39/LYN/CCL2/PF4V1/CSF3R/CCR2/NCKAP1L/CXCL6/GPR18/ADGRE2/PLA2G7/PTPRO/CCR5/CCR1/F2RL1/SCG2/S100A14/AIF1/MMP28/CCL4/CCL15/CCL4L1/CCL3L1/CCL3L3/CCL14	63
GO:0033500	carbohydrate homeostasis	67/812	4.93E-05	0.000604511	0.000416538	PAX6/BAIAP3/NADK/TFAP2B/MLXIPL/PTPRN/MAP4K4/PAX2/SIRT6/AACS/OPRK1/NOX4/HNF4A/PIK3R2/GCK/POMC/LEPR/CNR1/LRP1/VGF/TRPM4/SESN2/ANO1/MTNR1B/RAC1/IGF1R/EPHA5/STAR/CRH/TCF7L2/FOXO1/PTPRN2/SLC16A1/ADCY8/TIAM1/HKDC1/KCNB1/HK2/LRP5/NEUROD1/CARTPT/FOXK1/CYP7A1/IRS1/ASPSCR1/ADRA1B/PRKCE/ADCY5/BRSK2/LEP/ERN1/BHLHA15/RPH3AL/ZBTB20/CSMD1/EFNA5/PLA2G6/PTCH1/NMB/PPP1R3G/PCK1/FOXA2/FOXA1/HNF1A/PDX1/HK3/FOXA3	67
GO:0032663	regulation of interleukin-2 production	22/812	4.94E-05	0.000604511	0.000416538	TBX21/HOMER2/GATA3/PDE4D/IL1A/SPTBN1/IL1B/TRAF2/VTCN1/HAVCR2/IRF4/RUNX1/CD34/IL20RB/PDE4B/CARD11/TRIM27/PTPRC/CCR2/SASH3/CLEC7A/CD3E	22
GO:0046928	regulation of neurotransmitter secretion	35/812	4.95E-05	0.000604511	0.000416538	BAIAP3/APBA2/SYT1/CAMK2A/RIMS1/CHRNA3/DNM1L/STX1B/RIMS4/CHRNA4/NAPA/DVL1/P2RX1/CNR1/ADRA1A/GIPC1/PRKCG/UNC13A/SNCA/CPLX2/DRD2/DGKI/ADCY1/CACNB2/PRKCB/CPLX1/RIMS2/CHRM2/BACE1/NF1/GRIN3A/STX1A/KMO/CHRNA5/ADORA2B	35
GO:0007200	phospholipase C-activating G protein-coupled receptor signaling pathway	34/812	4.98E-05	0.000605954	0.000417533	PTGER3/ACTN2/OPRK1/ESR1/CHGA/OPRM1/NPR3/TACR1/OPRD1/ADRA1A/ANO1/GRP/NMBR/EDNRB/HCRTR2/LHCGR/PLCE1/DRD2/GRM1/GRM5/DRD5/ADRA1B/C3AR1/CHRM2/GALR2/HRH1/GPR18/GPR65/F2RL1/CX3CR1/P2RY12/KISS1/FPR1/GPR35	34
GO:0048010	vascular endothelial growth factor receptor signaling pathway	33/812	4.98E-05	0.000605954	0.000417533	FLT4/BCAR1/CYFIP2/FGF10/HSP90AA1/MT3/PXN/FGF9/FLT1/PIK3R2/GRB10/NRP2/IL1B/KDR/VAV3/RAC1/MYOF/VEGFC/ELMO1/VAV2/PRKCB/BAIAP2/FOXC2/SRC/MIR10B/PDCD6/ITGB3/CYFIP1/NCF4/NCF2/NCKAP1L/NCF1/CYBB	33
GO:0035051	cardiocyte differentiation	50/812	5.08E-05	0.000616759	0.000424978	ISL1/MYOM2/SEMA3C/ACTN2/NOX4/TBX5/SLC9A1/MAPK3/SOX6/BVES/RGS4/ADRA1A/TBX2/TWIST1/EFNB2/BMP4/KDM6B/MYH11/MYBPC3/PDGFRA/TBX3/SIK1/EGFR/NOTCH1/PAK1/ITGB1/WNT3A/SORBS2/NRG1/ACTC1/VCAM1/EOMES/SPRY1/PITX2/HAND2/SOX17/GREM1/NKX2-6/ANXA2/SLC8A1/NKX2-5/WT1/RXRA/MYH6/DLL1/MIR1-1/SOX18/MIR200B/NEBL/MYOM3	50
GO:0071774	response to fibroblast growth factor	46/812	5.23E-05	0.000633324	0.000436392	CD44/GPC1/FGFR2/FGF10/FGF22/FGF4/FGFR1/FGF9/MAPK3/SFRP1/GATA3/FGF8/COL1A1/SMOC2/FGF1/FGF12/RUNX2/FGFRL1/KCNC1/KL/SPRY2/FGF5/SNCA/STAR/PRDM14/CREB3L1/FGF19/SPRY1/OTX2/HNRNPF/SHCBP1/FAM20C/GRB2/EGR3/TBX1/FLRT2/FGF3/SPRY4/FAT4/MIR1-1/TRIM71/LHX1/ESRP2/ESRP1/CCL2/FGFBP1	46
GO:0071300	cellular response to retinoic acid	26/812	5.29E-05	0.000639784	0.000440844	CYP26B1/EPHA3/LTK/FGFR2/PAX2/TESC/PTK6/ADNP2/HOXA2/COL1A1/FZD10/WNT6/SOX9/ALDH1A2/NTRK3/ABL2/OSR1/WNT3A/RET/LEP/TBX1/GJB3/LYN/PCK1/WNT7B/BRINP2	26
GO:0007043	cell-cell junction assembly	41/812	5.32E-05	0.000642209	0.000442515	CD9/PKP2/CBFB/FSCN1/EPB41L3/SMAD7/SNAI1/CDH13/TBCD/EPHA2/ANK2/CDH18/CDH22/MPP7/CDH8/PRKCA/FLCN/F11R/RUNX1/ACE/NFASC/CLDN19/GJB2/CTNND2/CDH2/UGT8/CDH4/GPBAR1/CLDN5/PKP3/MYO1C/ARL2/CDH17/GRHL2/ACE2/CRB3/MARVELD3/PTPRO/MARVELD2/GJB1/TNF	41
GO:0007548	sex differentiation	73/812	5.45E-05	0.00065169	0.000449047	SOX8/MGST1/PTPRN/DMRT3/FGF10/TP63/HOXA9/PGR/NCOA1/TFAP2C/ESR1/COL9A3/BIK/HNF4A/FGF9/SALL1/SFRP1/AMH/LFNG/GATA3/FGF8/SDC1/TCF21/SOX9/VGF/HOXD13/PDGFRA/TBX3/ACVR1B/NKX2-1/NR5A1/DMRT1/FOXF2/STRA6/LHCGR/DHH/ADCYAP1/OSR1/SLIT2/SFRP2/LHFPL2/STAR/GAS2/BMP6/LHX8/SHH/ZFPM2/BCL2/UTF1/LEP/GPR149/BASP1/IRX5/ZFP42/NEUROG1/FOXL2/SLIT3/IMMP2L/WT1/PBX1/HYAL3/SRC/NTRK1/HOXA10/NCOA4/LHX1/SRD5A2/HOXA11/SIX4/EREG/AM…	73
GO:0045927	positive regulation of growth	73/812	5.45E-05	0.00065169	0.000449047	CD38/CACNA2D2/EXTL3/FGFR2/SYT1/FGFR1/RIMS1/KDM2B/TBX5/SLC9A1/ADNP2/FGF9/SFRP1/CACNG7/AGR2/FGF8/RASAL1/EIF4G1/TBX2/GHSR/LRP1/MACF1/INO80/MYOD1/UNC13A/MAP1B/ATP8A2/NGF/ADAM10/NTRK3/RPTOR/SLC6A3/SFRP2/EGFR/NOTCH1/PAK1/DRD2/POU4F2/WNT3A/SPTBN4/UCN/TBX20/AVPR1A/ISLR2/ZFPM2/DSCAM/SLC25A33/BCL2/LEP/SH3PXD2B/SFN/RIMS2/BDNF/BASP1/CDH4/EFNA5/WT1/CIB1/HSF1/MAPT/SEMA4D/AGRN/ITSN2/DLL1/SMURF1/BMPR2/SLC44A4/SY…	73
GO:0007171	activation of transmembrane receptor protein tyrosine kinase activity	9/812	5.47E-05	0.00065169	0.000449047	CHRNA3/ANGPT4/EGF/PDGFC/ANGPT1/NRG1/GREM1/EFNA5/NRG3	9
GO:0015812	gamma-aminobutyric acid transport	9/812	5.47E-05	0.00065169	0.000449047	SLC6A13/NTSR1/SLC32A1/SLC6A12/SLC6A11/SLC6A1/TRH/NF1/P2RX7	9
GO:0021978	telencephalon regionalization	9/812	5.47E-05	0.00065169	0.000449047	PAX6/LHX2/BMP4/EMX1/SIX3/DMRTA2/EOMES/SHH/EMX2	9
GO:0031223	auditory behavior	9/812	5.47E-05	0.00065169	0.000449047	NRXN2/STRA6/DRD2/CNTNAP2/NRXN1/NEUROG1/HTT/SLITRK6/TIFAB	9
GO:0031650	regulation of heat generation	9/812	5.47E-05	0.00065169	0.000449047	PTGER3/CNR1/IL1B/SLC27A1/EDNRB/TNFRSF11A/PTGS2/NMU/TNF	9
GO:0051058	negative regulation of small GTPase mediated signal transduction	23/812	5.57E-05	0.000662163	0.000456264	RASIP1/MET/RAPGEF1/KCTD10/RASAL1/TRIM67/MAPKAP1/ADRA1A/STAMBP/SPRY2/ABL2/SLIT2/RASA1/ITGB1/FLCN/SPRY1/FBP1/RASA3/SPRY4/NF1/ITGA3/RASAL3/ARHGAP25	23
GO:0046328	regulation of JNK cascade	54/812	5.61E-05	0.000665352	0.000458461	WNT16/SPAG9/FLT4/MAP4K4/PHLPP1/GSTP1/MECOM/AXIN1/SFRP1/STK3/RAPGEF1/FZD10/EPHA4/MAPK8IP1/UNC5CL/KLHL31/IL1B/CCR7/TRAF2/PTPN22/TAOK3/IL1RN/MAPK8IP3/IGF1R/TNFRSF11A/MAP3K6/SFRP2/EGFR/MFHAS1/PAK1/TNIK/SH3RF1/EPHB1/TIAM1/SH3RF2/FGF19/GRIK2/ULK4/ZEB2/SH3RF3/TLR6/HRAS/ERN1/MAP3K5/FCGR2B/MAP4K1/ERN2/MARVELD3/FGD2/NCF1/F2RL1/RASGRP1/WNT7B/TNF	54
GO:0002761	regulation of myeloid leukocyte differentiation	38/812	5.83E-05	0.000690046	0.000475477	CASP8/CLDN18/GNAS/TESC/SFRP1/IL23A/FOXP1/HOXA7/ZBTB46/POU4F2/POU4F1/PRKCA/RUNX1/TAL1/CARTPT/FBN1/FOS/CTNNBIP1/ZFPM1/FES/MITF/NF1/MAFB/MIR125B1/BGLAP/LYN/CEACAM1/LILRB1/LIF/IL34/C1QC/CCR1/DCSTAMP/HCLS1/EVI2B/LILRB4/LILRB3/TNF	38
GO:0048640	negative regulation of developmental growth	37/812	5.97E-05	0.000705405	0.000486059	FSTL4/GAL/SEMA3C/MAP2/TP73/KCNK2/MT3/TBX5/TLL2/LGMN/SFRP1/STK3/PTPRS/RAI1/WWC1/STC2/TNR/RGS4/SOCS2/CDKN1A/BMP4/PLAC8/SFRP2/PAK1/WNT3A/RYK/SEMA4B/PTCH1/DCC/SEMA4D/SEMA4A/MIR1-1/MIR200B/SEMA4G/MAG/BCL11A/GDF15	37
GO:0045668	negative regulation of osteoblast differentiation	21/812	6.05E-05	0.000713629	0.000491726	HDAC4/SFRP1/HOXA2/SUFU/TWIST1/TRPM4/SMAD6/NOTCH1/SKI/LRP5/HAND2/GREM1/SMAD3/AXIN2/PTCH1/SEMA4D/GDF10/AREG/ID1/TOB1/TNF	21
GO:0010830	regulation of myotube differentiation	24/812	6.13E-05	0.000720771	0.000496648	CYP26B1/CFLAR/HDAC4/NFATC2/HDAC5/EHD1/MYF6/MYOD1/SIK1/NOTCH1/CAPN2/ANKRD2/SHOX2/BCL2/BDNF/TRIM72/BHLHA15/NKX2-5/TBX1/MIR1-1/MIR200B/CEACAM5/GDF15/CD53	24
GO:0050433	regulation of catecholamine secretion	24/812	6.13E-05	0.000720771	0.000496648	SYT7/SYT1/OPRK1/CHGA/HRH3/CHRNA4/SYT10/CNR1/GHSR/SYT5/SYT6/SNCA/CRH/DRD2/KCNB1/UCN/CARTPT/GDNF/NPY2R/SYT3/SYT13/STX1A/SYT8/P2RY12	24
GO:0009798	axis specification	30/812	6.17E-05	0.000724008	0.000498878	PAX6/FGF10/SFRP1/COBL/MDFI/IRX4/CDX1/WNT6/BMP4/TBX3/SMAD6/SIX3/PCSK6/NOTCH1/TBX6/ETS2/SKI/PITX2/SHH/OTX2/HOXD8/BASP1/NEUROG1/WT1/PTCH1/DLL1/RIPPLY2/LHX1/FOXA2/TIFAB	30
GO:0014047	glutamate secretion	19/812	6.19E-05	0.000724435	0.000499172	SYT1/RIMS1/HRH3/NTSR1/SLC17A7/GIPC1/SNAP25/PPFIA4/SNCA/NPY5R/AVPR1A/CPLX1/TRH/CCK/GRM7/NF1/P2RX7/STX1A/KMO	19
GO:0048709	oligodendrocyte differentiation	33/812	6.29E-05	0.000735787	0.000506995	SOX8/PAX6/CD9/TP73/GSTP1/CSK/GLI3/SOX6/CDKN2C/SOX9/NKX2-2/NKX2-1/ASCL1/DLX1/NOTCH1/PRDM8/NRG1/B4GALT5/SLC45A3/NKX6-1/SHH/ID4/BNIP3/SOX11/OLIG1/NF1/OLIG2/LYN/FA2H/MAG/MYRF/IL34/ZNF488	33
GO:0055001	muscle cell development	54/812	6.58E-05	0.000767157	0.00052861	CFLAR/CACNA2D2/MYOM2/HDAC4/ACTN2/NFATC2/COMP/MYF6/BVES/SDC1/RGS4/TNNT2/ADRA1A/LDB3/BMP4/MYOD1/TNNT3/MYH11/MYBPC3/PDGFRA/TBX3/DYSF/CAPN9/MYOF/ACTA1/ANK2/MEGF10/NOTCH1/PAK1/ITGB1/UCHL1/OBSCN/SORBS2/SKI/ACTC1/SHOX2/BCL2/NKX2-6/SLC8A1/NKX2-5/SGCZ/SMYD3/P2RX2/DNER/RYR1/MYH6/MIR1-1/XK/NEBL/SIX4/MYOM3/KRT8/KRT19/KEL	54
GO:0048048	embryonic eye morphogenesis	16/812	6.63E-05	0.000772578	0.000532345	WNT16/PAX6/PAX2/KDM2B/EFEMP1/TBX2/TWIST1/TFAP2A/FOXF2/STRA6/SIX3/FBN2/FBN1/SOX11/FOXL2/IHH	16
GO:0021915	neural tube development	48/812	6.72E-05	0.000781388	0.000538416	PAX6/PAX7/GLI2/SEMA3C/CELSR1/PAX2/PLXNA2/KDM2B/ITPK1/TSC2/SFRP1/STK3/COBL/GLI3/LHX2/DVL1/FGF8/SUFU/TWIST1/BMP4/ALDH1A2/SHROOM3/EPHA2/LMO4/GDF7/SFRP2/FERD3L/NOTCH1/ST14/WNT3A/SKI/GRHL3/EN1/SHH/SOX17/GBX2/ZEB2/FOXB1/HES3/SOX11/ALX1/PTCH1/NF1/TRAF3IP1/TRIM71/GRHL2/OVOL2/FOXA1	48
GO:0106106	cold-induced thermogenesis	44/812	6.89E-05	0.000797665	0.000549631	SIRT6/GNAS/SCD/ZNF423/NOVA2/GRB10/PHOX2B/LAMA4/NPR3/LEPR/G0S2/KDM6B/IRF4/TLE3/IGF1R/ADCYAP1/PRDM16/PTH2R/PLAC8/PDGFC/LCN2/NOTCH1/IL18/ACSL1/ADAMTS5/FLCN/PLCL2/ACOT11/SLN/KSR2/LEP/CIDEA/FOXC2/HOXC10/EHMT1/HSF1/ADRB3/ESRRG/EBF2/ACTN3/CCR2/ID1/CD36/DIO2	44
GO:0120161	regulation of cold-induced thermogenesis	44/812	6.89E-05	0.000797665	0.000549631	SIRT6/GNAS/SCD/ZNF423/NOVA2/GRB10/PHOX2B/LAMA4/NPR3/LEPR/G0S2/KDM6B/IRF4/TLE3/IGF1R/ADCYAP1/PRDM16/PTH2R/PLAC8/PDGFC/LCN2/NOTCH1/IL18/ACSL1/ADAMTS5/FLCN/PLCL2/ACOT11/SLN/KSR2/LEP/CIDEA/FOXC2/HOXC10/EHMT1/HSF1/ADRB3/ESRRG/EBF2/ACTN3/CCR2/ID1/CD36/DIO2	44
GO:0071560	cellular response to transforming growth factor beta stimulus	68/812	6.91E-05	0.000798979	0.000550537	CFLAR/CREBBP/DKK3/FGFR2/ITGA8/NOX4/NLK/PXN/LTBP4/FERMT1/SMAD7/SFRP1/ARHGEF18/COL1A1/SNX25/SOX6/GCNT2/GIPC1/PMEPA1/SOX9/RASL11B/COL4A2/ACVR1B/NKX2-1/SKIL/SMAD6/FBN2/PRDM16/CGN/PARP1/DLX1/STAR/FLCN/SKI/F11R/ZYX/HPGD/HTRA1/FBN1/SMAD3/LTBP3/NPNT/ONECUT1/FOS/CHST11/PDE3A/CIDEA/SOX11/ZBTB7A/DAND5/PENK/CLDN5/WWOX/SRC/ADAMTSL2/SMURF1/BMPR2/GDF10/ITGA3/ONECUT2/OVOL2/ID1/GDF15/AMHR2/LEFTY2/FOXH1/CX3CR1/HTR…	68
GO:1905477	positive regulation of protein localization to membrane	39/812	6.94E-05	0.000801157	0.000552037	EPHA3/CASP8/TP63/TP73/SORBS1/NECAB2/ANXA13/CLIP3/AGR2/SPTBN1/PPP3CC/RAMP3/LRP1/ARHGEF16/NMT1/STAC2/EPHA2/STAC/EGFR/PAK1/ITGB1/ANK3/WNT3A/KCNB1/ITGB2/SQSTM1/CNST/ITGAM/PRKCE/BCL2/HRAS/DPP10/SFN/CIB1/MYO1C/ITGA3/CEMIP/PLS1/TNF	39
GO:0007159	leukocyte cell-cell adhesion	87/812	7.04E-05	0.000810769	0.000558661	MAD1L1/ITGAL/RUNX3/CD44/CBFB/STK10/TBX21/GLI2/ADD2/MADCAM1/SMAD7/CORO1A/CSK/GLI3/DOCK8/GATA3/ZMIZ1/ZBTB16/CD5/SELPLG/IL23A/ITGA4/IGFBP2/IL1RL2/EFNB2/BMP4/IL1B/CCR7/EPO/PTPN22/VTCN1/HAVCR2/GPNMB/RAC1/PDE5A/ITGB7/PAK1/FERMT3/ITGB1/IL18/ADAM8/THY1/MIA3/CD1D/RUNX1/ITGB2/VCAM1/SHH/CCDC88B/PTAFR/IL20RB/LEP/GRB2/EGR3/CLEC4G/SEMA4D/PDCD1/SRC/ELANE/CARD11/LYN/FCGR2B/CEACAM1/PTPRC/LILRB1/RASAL3/EBI3/CCL2/Z…	87
GO:0030282	bone mineralization	37/812	7.36E-05	0.000846464	0.000583257	FGR/SBNO2/FGFR2/SMPD3/COMP/MINPP1/TWIST1/BMP4/SOX9/TRPM4/KL/GPNMB/TFAP2A/FBN2/OSR1/RSPO2/BMP6/PKDCC/OSR2/NELL1/GREM1/SMAD3/LTBP3/AXIN2/PHOSPHO1/LEP/FAM20C/SLC8A1/BMPR2/BGLAP/PTGS2/SNX10/P2RX7/TUFT1/AHSG/CCR1/RFLNA	37
GO:0098815	modulation of excitatory postsynaptic potential	18/812	7.39E-05	0.000847621	0.000584054	RIMS1/MTMR2/STX1B/CBLN1/DVL1/CUX2/RGS4/SH3GL1/TMEM108/SHANK1/SHANK2/NETO1/BAIAP2/RIMS2/GRIN1/NRXN1/NPY2R/STX1A	18
GO:0021988	olfactory lobe development	15/812	7.50E-05	0.000857801	0.000591068	CRTAC1/EFNA2/SALL1/DLX5/LHX2/NR2E1/FEZF1/SLIT2/SKI/EOMES/UNCX/ROBO1/EXT1/CSF1R/SALL3	15
GO:0007158	neuron cell-cell adhesion	10/812	7.53E-05	0.000857801	0.000591068	NRXN3/NRXN2/TNR/CNTN4/ASTN1/NCAM2/RET/CEL/NINJ2/NRXN1	10
GO:0014048	regulation of glutamate secretion	10/812	7.53E-05	0.000857801	0.000591068	HRH3/NTSR1/SNCA/NPY5R/AVPR1A/TRH/CCK/GRM7/P2RX7/KMO	10
GO:0016101	diterpenoid metabolic process	36/812	7.54E-05	0.000857801	0.000591068	CYP26B1/GPC1/AKR1B1/CYP26A1/RARRES2/CYP2C18/RBP1/SDC1/LRP1/ALDH1A2/STRA6/CYP1B1/EGFR/STAR/CRH/NAPEPLD/DHRS3/PLB1/CRABP1/SDC2/SDR16C5/LPL/GPC5/GPC6/AGRN/BCO2/CYP3A5/APOE/BCO1/CRABP2/CYP3A4/AKR1B10/AKR1C4/AKR1B15/UGT1A1/UGT1A8	36
GO:0061387	regulation of extent of cell growth	36/812	7.54E-05	0.000857801	0.000591068	FSTL4/SEMA3C/MAP2/MT3/NRCAM/DPYSL2/PTPRS/TNR/LRP1/MACF1/MAP1B/NGF/NTRK3/BARHL2/PAK1/POU4F2/WNT3A/NKX6-1/RYK/ISLR2/DSCAM/BDNF/CDH4/EFNA5/SEMA4B/MAPT/DCC/SEMA4D/SEMA4A/BMPR2/PLXNA4/CYFIP1/SEMA4G/MAG/APOE/CRABP2	36
GO:0008306	associative learning	28/812	7.61E-05	0.000862125	0.000594047	TAC1/OPRK1/LGMN/NDRG4/NPTX2/HRH2/TNR/SNAP25/TBR1/ADCY3/CRH/DRD2/ITGB1/SHANK1/UCN/NETO1/RGS14/DRD5/FOS/NEUROD2/FOXB1/SYNPO/GRIN1/GABRA5/CCK/HRH1/NF1/SLC7A11	28
GO:2000243	positive regulation of reproductive process	28/812	7.61E-05	0.000862125	0.000594047	HDAC4/LFNG/CCR6/TACR1/SOX9/ACVR1B/EDNRB/NR5A1/DMRT1/PDE5A/LHFPL2/GLRA1/PRDM14/MSX1/PLB1/SHH/PTAFR/TACR3/ZFPM2/PDE3A/OVOL1/MAPK15/WT1/CIB1/HYAL3/CACNA1H/SRC/MSX2	28
GO:1905475	regulation of protein localization to membrane	54/812	7.69E-05	0.000869179	0.000598908	EPHA3/GPC1/CASP8/TP63/TP73/SORBS1/NECAB2/CSK/ANXA13/CLIP3/AGR2/SPTBN1/PPP3CC/GHSR/RAMP3/LRP1/ARHGEF16/VPS4A/NMT1/ADAM10/STAC2/EPHA2/STAC/EGFR/PAK1/ITGB1/ANK3/WNT3A/KCNB1/ITGB2/SQSTM1/GRASP/CNST/PKDCC/ITGAM/CDH2/PRKCE/BCL2/HRAS/DPP10/SFN/GPC5/KCNE1/GPC6/CIB1/NHLRC1/SHISA7/SHISA6/MYO1C/ITGA3/CEMIP/PLS1/SLC7A11/TNF	54
GO:0051963	regulation of synapse assembly	35/812	7.70E-05	0.000869179	0.000598908	CBLN1/PTPRS/CUX2/MDGA1/EIF4G1/GHSR/SLITRK3/NTRK3/LRTM1/SNCA/WNT3A/EPHB1/LHFPL4/CLSTN2/SLITRK5/LRFN5/CLSTN1/BDNF/GRIN1/SLITRK1/NRXN1/EFNA5/FLRT2/THBS2/SLIT1/SEMA4D/AGRN/IL1RAP/SEMA4A/NTRK1/LRRC24/SIX4/RAB17/EPHB3/SLITRK6	35
GO:0044262	cellular carbohydrate metabolic process	75/812	7.79E-05	0.000876369	0.000603862	MTMR7/EXTL3/HDAC4/INPP5A/RORA/SIRT6/SYNJ2/AKR1B1/MTMR2/MAEA/SORBS1/ITPK1/PYGB/NTSR1/IMPAD1/HAS1/PRKAG2/GCK/POMC/PASK/LEPR/SLC2A1/PPP1R3C/IDUA/CBFA2T3/SESN2/COQ3/DYSF/AOAH/ITPKA/LHCGR/MYOF/IGFBP4/SIK1/SNCA/IGFBP3/CSGALNACT1/FOXO1/INPP1/HKDC1/B4GALT5/SLC45A3/HK2/FOXK1/FBP1/MOGAT2/MIDN/IRS1/PTAFR/PFKFB3/PRKCE/RBKS/FGGY/LEP/GAL3ST3/B3GNT8/PHLDA2/IDH2/EXT1/NHLRC1/STK40/HRH1/SRC/PPP1R3G/B3GNT9/ACTN3/RU…	75
GO:1905954	positive regulation of lipid localization	29/812	7.79E-05	0.000876369	0.000603862	ABCB4/TAC1/GAL/NFKBIA/NTSR1/LIPG/EHD1/SCP2/FABP3/LRP1/IL1B/SSTR4/ATP8A2/TNFRSF11A/CRH/BMP6/UCN/GALR1/VSTM2A/LPL/CIDEA/ANXA2/PLA2G6/PTCH1/PLA2G10/P2RX7/APOE/CD36/ABCA12	29
GO:0060291	long-term synaptic potentiation	30/812	7.91E-05	0.000887742	0.000611699	SCGN/ITPR3/LGMN/CALB1/GRIN2D/CRHR2/NR2E1/EPHA4/TNR/SLC8A2/TSHZ3/SNAP25/SNCA/CRH/DRD2/ADCY8/SQSTM1/GRIN2C/SHANK1/SHANK2/ADCY1/FAM107A/RGS14/SHISA7/NF1/ARC/GRIN2B/APOE/LILRB2/CX3CR1	30
GO:1901379	regulation of potassium ion transmembrane transport	31/812	7.96E-05	0.000890735	0.000613762	KCNG1/KCNQ1/KCNH2/KCNAB2/GAL/ACTN2/OPRK1/KCNA1/RGS4/KCNS1/WNK4/KCNC1/ATP1B2/DPP6/MTNR1B/ANK2/ANK3/KCNS2/WNK2/KCNC2/NETO1/DPP10/KCNE1/GALR2/LRRC55/KCNIP4/WWP2/STK39/MIR1-1/ATP1B1/KEL	31
GO:0010038	response to metal ion	92/812	8.25E-05	0.000919118	0.000633318	CACNA1G/SYT7/DPEP1/ABCC2/GUCA1A/CASP8/SYT1/SNCB/MT3/ITPR3/LGMN/MMP9/MAPK3/SMPD3/TCIRG1/SYT10/KCNA1/RASAL1/APOBEC1/IL1A/SLC30A3/IGFBP2/SDC1/TNNT2/DUSP1/ANXA11/MT2A/FOSB/KCNC1/SYT5/SLC41A1/SYT6/TFAP2A/SLC40A1/ASCL1/SLC6A3/ACTA1/PARP1/CNGA3/SNCA/CRHBP/GLRA1/EGFR/STAR/DRD2/DLG2/ANK3/BMP6/ADCY8/KCNMA1/SLC6A1/SLC30A2/VCAM1/TERT/SHH/ADCY1/FBP1/KCNC2/STIM1/FOS/KCNK3/NEUROD2/BCL2/BSG/BNIP3/FIBIN/NQO1/PENK…	92
GO:0001958	endochondral ossification	14/812	8.28E-05	0.000919118	0.000633318	GNAS/SMPD3/IMPAD1/DLX5/COL1A1/MEF2D/RUNX2/BMP4/COL2A1/CSGALNACT1/BMP6/MMP16/ALPL/PHOSPHO1	14
GO:0036075	replacement ossification	14/812	8.28E-05	0.000919118	0.000633318	GNAS/SMPD3/IMPAD1/DLX5/COL1A1/MEF2D/RUNX2/BMP4/COL2A1/CSGALNACT1/BMP6/MMP16/ALPL/PHOSPHO1	14
GO:0045761	regulation of adenylate cyclase activity	14/812	8.28E-05	0.000919118	0.000633318	NPFFR2/PALM/NPR3/GNAI2/EDNRB/CACNA1C/GALR1/STIM1/DRD5/GALR2/NF1/CCR2/GPR87/P2RY13	14
GO:0042089	cytokine biosynthetic process	39/812	8.47E-05	0.000934108	0.000643647	MAP2K3/TRIB2/GATA3/IL1A/TNFRSF8/GHSR/IL1B/IGF2BP3/IRF4/IL18/CEBPG/IGF2BP1/PTAFR/AZU1/TLR6/ZFPM1/SIGIRR/IL1RAP/ELANE/CARD11/PTPRC/CEBPE/HMOX1/TLR8/LILRB1/EBI3/CCR2/EREG/FOXJ1/RNF128/NLRP12/CYBB/CX3CR1/CLEC7A/TLR7/SPN/CD3E/LTB/TNF	39
GO:0015872	dopamine transport	21/812	8.49E-05	0.000934108	0.000643647	SYT7/SYT1/OPRK1/CHRNA4/SLC6A2/SYT10/CNR1/SYT5/SYT6/SLC6A3/SNCA/SLC22A3/DRD2/SLC18A2/GDNF/MAPK15/NPY2R/SYT3/SYT13/SYT8/RAB3B	21
GO:0046580	negative regulation of Ras protein signal transduction	21/812	8.49E-05	0.000934108	0.000643647	RASIP1/MET/RAPGEF1/KCTD10/RASAL1/TRIM67/MAPKAP1/ADRA1A/STAMBP/SPRY2/ABL2/RASA1/ITGB1/FLCN/SPRY1/FBP1/RASA3/SPRY4/NF1/ITGA3/RASAL3	21
GO:0048168	regulation of neuronal synaptic plasticity	21/812	8.49E-05	0.000934108	0.000643647	RASGRF1/CAMK2A/SLC8A2/EGR2/UNC13A/SNCA/STAR/DRD2/JPH3/GRIK2/NETO1/GRM5/SYNPO/HRAS/GRIN1/SHISA7/SHISA6/NF1/ARC/SHISA9/APOE	21
GO:0072132	mesenchyme morphogenesis	21/812	8.49E-05	0.000934108	0.000643647	ISL1/FGFR1/FOXF1/FGF8/TBX2/TWIST1/SNAI1/SOX9/GATA5/ACTA1/OSR1/NOTCH1/WNT3A/ACTC1/MSX1/HEYL/TBX20/SMAD3/ROBO1/FOXC2/MSX2	21
GO:0050673	epithelial cell proliferation	107/812	8.60E-05	0.000945458	0.000651468	WNT16/CFLAR/CCL26/PAX6/ISL1/RUNX3/FLT4/PTPRN/FGFR2/FGF10/TP63/PAX2/SIRT6/FGFR1/FAP/PGR/LAMB1/ESR1/TGM1/FERMT1/FGF9/FLT1/SFRP1/DLX5/HOXA5/GATA3/THBS4/FGF1/ITGA4/F3/NRP2/GHSR/TWIST1/EFNB2/BMP4/SOX9/SLURP1/BCL11B/KDR/ALDH1A2/DYSF/EDNRB/NKX2-8/CDH13/RPTOR/IGFBP4/EPHA2/OSR1/SFRP2/EGFR/IGFBP3/NOTCH1/TCF7L2/VEGFC/BMP6/PRKCA/WNT3A/XDH/SGPP2/NKX6-1/BMPER/SHH/OSR2/HTRA1/SMAD3/ROBO1/SDR16C5/PTPRM/CD34/LEP/H…	107
GO:0031652	positive regulation of heat generation	8/812	8.63E-05	0.000945544	0.000651528	PTGER3/CNR1/IL1B/SLC27A1/TNFRSF11A/PTGS2/NMU/TNF	8
GO:0060174	limb bud formation	8/812	8.63E-05	0.000945544	0.000651528	FGFR2/FGF10/SEMA3C/PLXNA2/SOX9/COL2A1/SHH/SOX11	8
GO:0007163	establishment or maintenance of cell polarity	59/812	8.66E-05	0.000946605	0.000652258	CYP26B1/PAX6/ANK1/FGF10/NDE1/FSCN1/MAP2/HSP90AA1/FAT1/SLC9A1/FERMT1/LAMA1/FOXF1/FSCN3/LHX2/DOCK8/GATA3/LIN7A/UST/WWC1/ACTR3/ARHGEF2/MAPKAP1/TCF15/CCR7/MAP1B/LLGL1/DOCK2/MAP7/NEK3/SPRY2/RHOF/CRB2/PAK1/FEZ1/MPP7/DLG2/FRMD4A/DST/EPHB1/KIF26B/SPRY1/SHH/AMOTL1/MOS/BRSK2/FSCN2/PARVB/MYO18A/HTT/MISP/NCKAP1L/FOXJ1/PARVG/CD3G/SAPCD2/WNT7B/SPN/CCL4	59
GO:0048486	parasympathetic nervous system development	11/812	8.69E-05	0.000946976	0.000652514	PHOX2B/NRP2/HOXB1/EGR2/TFAP2A/PHOX2A/NAV2/GDNF/HES3/TBX1/PLXNA4	11
GO:0072087	renal vesicle development	11/812	8.69E-05	0.000946976	0.000652514	SOX8/PAX2/SALL1/BMP4/SOX9/PAX8/OSR1/KIF26B/GDNF/LHX1/LIF	11
GO:1902742	apoptotic process involved in development	17/812	8.75E-05	0.000951151	0.000655391	TNFRSF1A/FGF4/PAX2/PAX8/PPP2R1B/SIX3/SLIT2/MEGF10/NOTCH1/HAND2/FOXC2/NKX2-5/SLIT3/XKR4/XKR7/SPI1/XKR9	17
GO:0097186	amelogenesis	13/812	8.85E-05	0.00096108	0.000662232	ITGA6/TCIRG1/ITGB4/SLC24A4/FOXO1/STIM1/KLK4/FAM20C/TBX1/PERP/CSF3R/MSX2/AMTN	13
GO:0001759	organ induction	12/812	9.06E-05	0.000982088	0.000676708	FGF10/FGFR1/FGF8/FGF1/BMP4/GATA5/WNT3A/SPRY1/GDNF/ROBO1/HOXA11/HOXC11	12
GO:0048738	cardiac muscle tissue development	64/812	9.26E-05	0.000999954	0.000689019	ISL1/MYOM2/PKP2/COL11A1/FGFR2/SIRT6/ACTN2/FGFR1/TP73/KCNK2/NOX4/TBX5/SLC9A1/SMAD7/FGF9/NDRG4/PPP1R13L/FGF8/SOX6/BVES/HAND1/RGS4/TNNT2/ADRA1A/TBX2/EFNB2/BMP4/ALDH1A2/GATA5/KDM6B/MYH11/MYBPC3/PDGFRA/TBX3/SIK1/NOTCH1/PAK1/ITGB1/POU4F1/WNT3A/SORBS2/NRG1/ACTC1/TBX20/GREM1/ZFPM2/FOXC2/ZFPM1/NKX2-6/SLC8A1/NKX2-5/WT1/SGCZ/RXRA/FGF3/MYH6/RYR2/DLL1/MIR1-1/MIR200B/ERBB3/NEBL/MYOM3/FOXH1	64
GO:0050795	regulation of behavior	26/812	9.26E-05	0.000999954	0.000689019	HDAC4/OPRK1/HOXA1/LEPR/CNR1/GHSR/MTNR1B/HCRTR2/STRA6/ZFHX3/CRH/DRD2/NAPEPLD/UCN/TACR3/NPAS2/TRH/RXFP4/HTR1A/NRXN1/PENK/NPY2R/CCK/NMU/APOE/HTR1D	26
GO:0003281	ventricular septum development	27/812	9.60E-05	0.001034728	0.00071298	PRDM1/FGFR2/TBX5/TRIP11/SMAD7/SALL1/GATA3/SUFU/BMP4/PAX8/FGFRL1/TBX3/SMAD6/STRA6/LMO4/SLIT2/NOTCH1/HEYL/ROBO1/ZFPM2/SOX11/DAND5/ZFPM1/NKX2-5/SLIT3/MIR1-1/BMPR2	27
GO:0051899	membrane depolarization	31/812	0.000100757	0.001084358	0.000747177	CACNA1G/KCNH2/HCN2/CACNA1I/NTSR1/CHRNA4/SMAD7/FGF12/IFI6/KDR/TRPM4/CACNA1A/PARP1/ANK2/CACNA1B/CACNA1C/ANK3/GPD1L/CACNB2/BCL2/SLC8A1/CCK/CACNA1H/SCN8A/SRC/CACNA1E/MIR1-1/SCN4A/PTPN3/P2RX7/SCN11A	31
GO:0051954	positive regulation of amine transport	16/812	0.000102454	0.001100722	0.000758453	OPRK1/NTSR1/DRD2/SLC6A1/KCNB1/CARTPT/AVPR1A/GDNF/TRH/NPY2R/CCK/P2RX7/STX1A/KMO/ACE2/RAB3B	16
GO:0001838	embryonic epithelial tube formation	39/812	0.000103018	0.001102983	0.000760011	SOX8/CELSR1/PAX2/KDM2B/TSC2/SFRP1/STK3/COBL/LHX2/DVL1/GATA3/SUFU/HAND1/WNT6/TWIST1/BMP4/SOX9/PAX8/SHROOM3/LMO4/OSR1/GDF7/SFRP2/ST14/SKI/GRHL3/RET/GDNF/ZEB2/IRX1/IRX2/SOX11/IRX3/ALX1/PTCH1/TRIM71/GRHL2/SIX4/OVOL2	39
GO:0042107	cytokine metabolic process	39/812	0.000103018	0.001102983	0.000760011	MAP2K3/TRIB2/GATA3/IL1A/TNFRSF8/GHSR/IL1B/IGF2BP3/IRF4/IL18/CEBPG/IGF2BP1/PTAFR/AZU1/TLR6/ZFPM1/SIGIRR/IL1RAP/ELANE/CARD11/PTPRC/CEBPE/HMOX1/TLR8/LILRB1/EBI3/CCR2/EREG/FOXJ1/RNF128/NLRP12/CYBB/CX3CR1/CLEC7A/TLR7/SPN/CD3E/LTB/TNF	39
GO:0001837	epithelial to mesenchymal transition	43/812	0.000103878	0.001110286	0.000765043	WNT16/ISL1/WWTR1/EPHA3/FGFR2/TBX5/SMAD7/SFRP1/FGF8/COL1A1/GCNT2/MAD2L2/TWIST1/SNAI1/BMP4/SOX9/IL1B/NKX2-1/FOXF2/SFRP2/CRB2/NOTCH1/TCF7L2/HMGA2/TIAM1/PDPN/MSX1/EOMES/HEYL/SPRY1/NOLC1/GREM1/SMAD3/AXIN2/ALX1/POFUT2/PDCD6/FAM83D/MSX2/FOXA2/OVOL2/FOXA1/EFNA1	43
GO:0032970	regulation of actin filament-based process	97/812	0.000104357	0.001113503	0.00076726	TAC1/CCL26/CAPG/EPHA3/PKP2/LIMCH1/CTNNA2/SPTB/ARHGEF10L/CELSR1/ADD2/FSCN1/ACTN2/CAPZB/NOX4/ASAP3/PXN/SLC9A1/HCK/CORO1A/COTL1/SFRP1/ARHGEF10/MET/FZD10/PDE4D/ACTR3/SPTBN1/RGS4/CIT/LRP1/CCR7/BAIAP2L2/ARPC1B/TRPM4/KANK4/MYBPC3/PDGFRA/VILL/RAC1/SPTBN5/RHOF/FRMD6/NTRK3/ARHGEF19/ABL2/TMEFF2/SLIT2/EPHA5/ANK2/IQGAP2/RASA1/PAK1/CACNA1C/EPS8/FMN2/GRHL3/F11R/SPTBN4/SHANK1/PDPN/ATP1A1/SMAD3/CDC42EP5/FAM107A/P…	97
GO:0010770	positive regulation of cell morphogenesis involved in differentiation	46/812	0.000105674	0.001125628	0.000775615	PLXND1/PLXNA2/DNM1L/ARHGEF7/CAPRIN2/CUX2/PLXNA1/EPHA4/LRP1/MACF1/MAP1B/NGF/PLXNC1/RAC1/SKIL/ITPKA/NTRK3/SLIT2/DOCK5/PAK1/POU4F2/WNT3A/CHODL/TIAM1/ISLR2/SHOX2/ZEB2/ROBO1/DSCAM/FBXW8/BAIAP2/BDNF/SLITRK1/CDH4/MYADM/EFNA5/CIB1/MAPT/SEMA4D/S100A10/BMPR2/PLXNA4/CUX1/CYFIP1/NEFL/CRABP2	46
GO:0050432	catecholamine secretion	24/812	0.000110663	0.001176758	0.000810846	SYT7/SYT1/OPRK1/CHGA/HRH3/CHRNA4/SYT10/CNR1/GHSR/SYT5/SYT6/SNCA/CRH/DRD2/KCNB1/UCN/CARTPT/GDNF/NPY2R/SYT3/SYT13/STX1A/SYT8/P2RY12	24
GO:0070302	regulation of stress-activated protein kinase signaling cascade	65/812	0.000112545	0.001194738	0.000823235	WNT16/SPAG9/FLT4/MAP4K4/PHLPP1/OPRK1/GSTP1/MECOM/MAPK3/AXIN1/SFRP1/STK3/RAPGEF1/FZD10/EPHA4/DUSP1/MAPK8IP1/UNC5CL/KLHL31/IL1B/CCR7/MAP2K2/TRAF2/PTPN22/TAOK3/IL1RN/MAPK8IP3/IGF1R/TNFRSF11A/MAP3K6/SFRP2/EGFR/MFHAS1/PAK1/FOXO1/TNIK/SH3RF1/EPHB1/TIAM1/SH3RF2/GDF6/XDH/FGF19/HAND2/GRIK2/ULK4/ZEB2/SH3RF3/TLR6/LEP/HRAS/ERN1/MAP3K5/LYN/FCGR2B/MAP4K1/ERN2/MARVELD3/FGD2/NCF1/F2RL1/PBK/RASGRP1/WNT7B/TNF	65
GO:0051968	positive regulation of synaptic transmission, glutamatergic	15/812	0.000118371	0.001252328	0.000862917	CACNG7/TNR/TSHZ3/ADCYAP1/CACNG8/EGFR/SHANK1/SHANK2/NRXN1/NTRK1/CACNG3/PTGS2/CCL2/KMO/CCR2	15
GO:0043406	positive regulation of MAP kinase activity	69/812	0.000122925	0.0012983	0.000894594	SPAG9/MAP2K3/FGF10/FGFR1/TP73/NOX4/MAPKAPK5/FLT1/MAPK3/CSK/RAPGEF1/FZD10/FGF1/EPHA4/FLT3/GRM4/BMP4/IL1B/MAP2K2/TRAF2/TRAF7/NGF/TAOK3/PLCE1/PDE5A/EGF/MAPK8IP3/PDE6H/NTRK3/PIK3R5/TNFRSF11A/MAP3K6/PDGFC/EGFR/PAK1/ADAM8/GRM1/TNIK/TIAM1/NRG1/MST1R/CARTPT/RET/ZEB2/ROBO1/ALK/MOS/TLR6/HRAS/ERN1/NTF3/SRC/MAP3K5/ELANE/NTRK1/STK39/PTPRC/P2RX7/MAP4K1/GDF15/ERN2/FGD2/ADORA2B/FPR1/RASGRP1/IQGAP3/PDE6G/WNT7B/TNF	69
GO:0048469	cell maturation	32/812	0.000127335	0.001334251	0.000919366	SOX8/POU2F2/CBFB/GAL/EPHA8/TRIP13/FGFR1/PGR/MAEA/NRCAM/VSX1/HOXA5/LHX6/GATA3/CCR6/CDKN1A/RUNX2/BFSP1/EPO/C1QL1/EDNRB/SIX3/ASCL1/SRRM4/ABHD2/TBX6/B4GALT5/HOXB13/SPTBN4/TAL1/TRIM58/NPPC/NFASC/NKX6-1/RET/BCL2/PDE3A/CNTNAP2/IRX5/FAM20C/ZBTB7A/BHLHA15/AGRN/SOX18/BTK/BCL11A/EREG/FOXA1/IHH/CLEC7A/C1QA	51
GO:0097756	negative regulation of blood vessel diameter	29/812	0.000127444	0.001334251	0.000919366	CD38/TBXA2R/CHGA/COMP/P2RX1/HRH2/ECE1/ADRA1A/DOCK4/KCNA5/TRPM4/EDNRB/EGFR/DOCK5/HTR7/ACE/AVPR1A/PTAFR/DRD5/ADRA1B/LEP/HTR1A/SLC8A1/HRH1/BMPR2/PTGS2/ACE2/HTR1D/KEL	29
GO:0048644	muscle organ morphogenesis	30/812	0.000127536	0.001334251	0.000919366	PAX7/ISL1/MYOM2/PKP2/COL11A1/FGFR2/SIRT6/SMAD7/MYF6/HAND1/TNNT2/TCF15/MYBPC3/NOTCH1/POU4F1/NRG1/ACTC1/TBX20/SHOX2/ZFPM2/FOXC2/ZFPM1/NKX2-5/TBX1/RXRA/MYH6/RYR2/LIF/MYOM3/FOXH1	30
GO:0106027	neuron projection organization	30/812	0.000127536	0.001334251	0.000919366	NGEF/MTMR2/DNM1L/LGMN/DVL1/CAPRIN2/CUX2/EPHA4/DOCK10/ITPKA/ADAM10/IGF1R/EPHB1/TIAM1/SHANK1/SHANK2/CTNND2/BAIAP2/SIPA1L1/DNM3/ARC/GRIN2B/SRCIN1/ITGA3/FCGR2B/APOE/EFNA1/ZNF804A/ABCD2/EPHB3	30
GO:0050919	negative chemotaxis	19/812	0.000127825	0.001334251	0.000919366	SEMA3C/NRP2/LRTM1/SLIT2/NRG1/RYK/ROBO1/UNC5C/SLIT3/EFNA5/SEMA4B/FLRT2/NRG3/SLIT1/SEMA4D/SEMA4A/PLXNA4/ITGB3/SEMA4G	19
GO:0051339	regulation of lyase activity	19/812	0.000127825	0.001334251	0.000919366	NOS2/GUCA1A/NPFFR2/NOS1/PALM/NPR3/GNAI2/EDNRB/CACNA1C/GALR1/STIM1/DRD5/GALR2/NF1/CCR2/GPR87/ADORA2B/PDZD3/P2RY13	19
GO:0060443	mammary gland morphogenesis	19/812	0.000127825	0.001334251	0.000919366	FGFR2/FGF10/GLI2/PGR/ESR1/GLI3/TBX2/BMP4/TBX3/EPHA2/LRP5/CSF1R/NRG3/PTCH1/BSX/SRC/AREG/MSX2/ELF3	19
GO:0021781	glial cell fate commitment	9/812	0.000129318	0.001343102	0.000925465	SOX8/PAX6/SOX6/SOX9/NKX2-2/ASCL1/NRG1/TAL1/OLIG2	9
GO:0043374	CD8-positive, alpha-beta T cell differentiation	9/812	0.000129318	0.001343102	0.000925465	RUNX3/CBFB/PAX1/RUNX1/EOMES/BCL2/TNFSF8/NCKAP1L/GPR18	9
GO:0072498	embryonic skeletal joint development	9/812	0.000129318	0.001343102	0.000925465	BMP4/COL2A1/OSR1/OSR2/SHOX2/EXT1/HOXA11/HOXC11/IHH	9
GO:0038179	neurotrophin signaling pathway	17/812	0.000129932	0.001347234	0.000928312	BCAR1/CYFIP2/CORO1A/RAPGEF1/NGF/SPRY2/NTRK3/TMEM108/SPRY1/BDNF/GRB2/NTF3/MAGI2/SRC/NTRK1/CYFIP1/NTF4	17
GO:0043254	regulation of protein-containing complex assembly	105/812	0.000134579	0.0013908	0.000958331	CCL26/CAPG/CTNNA2/SPTB/ADD2/FSCN1/CAPZB/MAP2/SAR1A/HSP90AA1/DNM1L/ESR1/STX1B/BIK/HCK/RIOK3/CORO1A/COTL1/BMF/STMN2/CLIP3/NAPA/RASIP1/MET/SENP6/EIF4G1/ACTR3/SPTBN1/OPRD1/ARHGEF2/PMEPA1/EML2/CCR7/BAIAP2L2/ARPC1B/MAP1B/CHD1L/KANK4/ERCC5/HRK/VILL/RAC1/SORL1/SMAD6/SPTBN5/TBCD/PEX14/LMO4/PARP1/ANKRD53/SLIT2/SNCA/IQGAP2/RASA1/TTBK1/PAK1/MPP7/EPS8/FMN2/SPTBN4/TAL1/TBX20/PRRT2/CDC42EP5/TMC8/PRKCE/INSM1/TLR…	105
GO:0055002	striated muscle cell development	50/812	0.000135758	0.001400664	0.000965128	CFLAR/CACNA2D2/MYOM2/HDAC4/ACTN2/NFATC2/COMP/MYF6/BVES/SDC1/RGS4/TNNT2/ADRA1A/LDB3/BMP4/MYOD1/TNNT3/MYH11/MYBPC3/PDGFRA/TBX3/DYSF/CAPN9/MYOF/ACTA1/PAK1/ITGB1/UCHL1/OBSCN/SORBS2/SKI/ACTC1/SHOX2/BCL2/NKX2-6/SLC8A1/NKX2-5/SMYD3/P2RX2/DNER/RYR1/MYH6/MIR1-1/XK/NEBL/SIX4/MYOM3/KRT8/KRT19/KEL	50
GO:0002237	response to molecule of bacterial origin	87/812	0.00013644	0.001405378	0.000968376	TAC1/TBXA2R/NOS2/MGST1/FMO1/SLC11A1/ABCC2/TNIP3/CASP8/SBNO2/FGFR2/FGF10/OPRK1/GSTP1/NOS1/NFKBIA/HCK/MAPK3/HDAC5/OPRM1/PDE4D/PLSCR4/FOXP1/CNR1/GHSR/PTGFR/IL1B/CCR7/EPO/PTPN22/HAVCR2/EDNRB/IL1RN/CASP1/SMAD6/TNFRSF11A/SNCA/STAR/LCN2/NOTCH1/IL18/BMP6/PRKCA/ABR/ALPL/VCAM1/CAPN2/HPGD/GJB2/TNIP2/PTAFR/FOS/PRKCE/TLR6/SSC5D/PENK/PDE4B/HSF1/SIGIRR/ATP4B/LITAF/SRC/ELANE/LYN/FCGR2B/PTGS2/P2RX7/CEBPE/LILRB1/C…	87
GO:0046683	response to organophosphorus	41/812	0.000137218	0.001411064	0.000972294	KCNQ1/PTPRN/SREBF1/NOX4/HCN2/AQP8/RAPGEF1/P2RX1/ALDH3A1/COL1A1/PANX1/SDC1/DUSP1/ITPR2/IL1B/FOSB/VGF/CDO1/TRPM4/DUOX2/SLC6A3/CNGA3/CRHBP/STAR/HCN1/PTAFR/FOS/BSG/PDE3A/KCNE1/PENK/SLC8A1/WT1/P2RX2/RYR3/PTGS2/P2RX7/AREG/PCK1/P2RY12/FOSL1	41
GO:0003170	heart valve development	23/812	0.000138778	0.001424752	0.000981726	PRDM1/TNFRSF1A/TBX5/GATA3/TWIST1/SNAI1/BMP4/SOX9/FGFRL1/GATA5/NFATC1/SMAD6/STRA6/SLIT2/NOTCH1/HEYL/TBX20/SHOX2/ROBO1/ZFPM1/SLIT3/BMPR2/EFNA1	23
GO:0030203	glycosaminoglycan metabolic process	47/812	0.000139295	0.001427716	0.000983768	PGLYRP1/EXTL3/CD44/GPC1/SLC9A1/SMPD3/XYLT1/IMPAD1/HAS1/B3GAT1/GCNT2/UST/SDC1/HS3ST2/ITIH5/HS3ST3B1/IL1B/IDUA/NCAN/BCAN/CHST12/EGF/KERA/CSGALNACT1/ANGPT1/ACAN/B4GALT5/PGLYRP2/HS3ST6/EGFLAM/SDC2/CHST11/HPSE2/CHST2/GPC5/CHST15/EXT1/GPC6/HYAL3/AGRN/CEMIP/STAB2/GALNT5/PGLYRP4/NDNF/B3GNT3/HS3ST5	47
GO:0032609	interferon-gamma production	36/812	0.000139957	0.001432148	0.000986822	PGLYRP1/ISL1/SLC11A1/GATA3/TCIRG1/IL23A/PDE4D/IL1B/CCR7/PTPN22/VTCN1/HAVCR2/IL18/CEBPG/EOMES/IL20RB/HRAS/ZFPM1/PDE4B/TRIM27/TLR8/LILRB1/EBI3/IL18RAP/CCR2/SASH3/CD244/CD226/PGLYRP4/F2RL1/CLEC7A/RASGRP1/TLR7/SPN/CD3E/TNF	36
GO:1903039	positive regulation of leukocyte cell-cell adhesion	60/812	0.000141862	0.001449267	0.000998618	RUNX3/CD44/CBFB/GLI2/CORO1A/CSK/GLI3/DOCK8/GATA3/ZMIZ1/ZBTB16/CD5/IL23A/ITGA4/IGFBP2/IL1RL2/EFNB2/IL1B/CCR7/EPO/VTCN1/HAVCR2/RAC1/PAK1/IL18/ADAM8/THY1/CD1D/RUNX1/ITGB2/VCAM1/SHH/CCDC88B/PTAFR/LEP/GRB2/EGR3/PDCD1/SRC/ELANE/CARD11/LYN/PTPRC/LILRB1/RASAL3/EBI3/CCL2/ZAP70/CCR2/SASH3/NCKAP1L/LILRB2/IHH/RASGRP1/CLECL1/BTLA/LILRB4/CD3E/AIF1/TNF	60
GO:0071229	cellular response to acid chemical	58/812	0.000142564	0.001454059	0.00100192	CYP26B1/ABCB4/EPHA3/LTK/FGFR2/SREBF1/PAX2/MMP2/TESC/PTK6/ADNP2/SFRP1/HOXA2/CPEB3/COL1A1/FZD10/WNT6/PTGFR/SOX9/KDR/ALDH1A2/SH3BP4/LDLR/SESN2/PDGFRA/NTRK3/RPTOR/ABL2/OSR1/PDGFC/GLRA1/EGFR/WNT3A/CAPN2/RET/AVPR1A/PTGDR/IRS1/PTAFR/PRKCE/LEP/LPL/BAIAP2/TBX1/HSF1/COL4A1/GJB3/SRC/SIPA1/CPEB1/LYN/BCL11A/PCK1/CYBB/WNT7B/AKR1C4/BRINP2/TNF	58
GO:0048634	regulation of muscle organ development	46/812	0.000147838	0.001500342	0.001033811	CYP26B1/GPC1/FGFR2/HDAC4/FGFR1/TP73/KCNK2/TBX5/TLL2/FGF9/FGF8/SOX6/MYF6/RGS4/TBX2/TWIST1/EFNB2/BMP4/MYOD1/MEGF10/NOTCH1/PAK1/WNT3A/EPHB1/NRG1/SFMBT1/TBX20/SHH/SOX17/GREM1/SMAD3/SHOX2/ZFPM2/BCL2/NR1D2/NEUROG1/NKX2-5/TBX1/FGF3/DLL1/MIR1-1/MIR200B/ACTN3/ERBB3/SIX4/TIFAB	46
GO:0035296	regulation of tube diameter	43/812	0.000147887	0.001500342	0.001033811	CD38/TBXA2R/NOS1/CHGA/COMP/P2RX1/HRH2/ECE1/ADRA1A/DOCK4/KCNA5/TRPM4/MTNR1B/EDNRB/ADCYAP1/EGFR/DOCK5/HTR7/KCNMA1/ACE/NPPC/UCN/AVPR1A/PTAFR/DRD5/ADRA1B/PTPRM/LEP/FOXC2/HTR1A/SLC8A1/PLA2G6/ADRB3/HRH1/BMPR2/PTGS2/HMOX1/APOE/ACE2/F2RL1/ADORA2B/HTR1D/KEL	43
GO:0097746	regulation of blood vessel diameter	43/812	0.000147887	0.001500342	0.001033811	CD38/TBXA2R/NOS1/CHGA/COMP/P2RX1/HRH2/ECE1/ADRA1A/DOCK4/KCNA5/TRPM4/MTNR1B/EDNRB/ADCYAP1/EGFR/DOCK5/HTR7/KCNMA1/ACE/NPPC/UCN/AVPR1A/PTAFR/DRD5/ADRA1B/PTPRM/LEP/FOXC2/HTR1A/SLC8A1/PLA2G6/ADRB3/HRH1/BMPR2/PTGS2/HMOX1/APOE/ACE2/F2RL1/ADORA2B/HTR1D/KEL	43
GO:0042481	regulation of odontogenesis	13/812	0.000148784	0.001500342	0.001033811	DMRT3/FGF8/WNT6/RUNX2/BMP4/TFAP2A/RSPO2/MSX1/SHH/CD34/SP6/PAX9/AMTN	13
GO:0050926	regulation of positive chemotaxis	13/812	0.000148784	0.001500342	0.001033811	F7/FGF10/ANGPT2/F3/KDR/NTRK3/CDH13/VEGFC/SMAD3/AZU1/NTF3/F2RL1/SCG2	13
GO:0060037	pharyngeal system development	13/812	0.000148784	0.001500342	0.001033811	ISL1/PLXNA2/GATA3/FGF8/ECE1/BMP4/NKX2-6/NKX2-5/TBX1/PTCH1/BMPR2/SIX4/RIPPLY3	13
GO:0099560	synaptic membrane adhesion	13/812	0.000148784	0.001500342	0.001033811	IGSF9B/PTPRS/MDGA1/PCDH17/SLITRK3/PCDH8/PTPRF/NTNG1/LRFN5/SLITRK1/NRXN1/EFNA5/IL1RAP	13
GO:0031649	heat generation	10/812	0.000154166	0.001552099	0.001069475	PTGER3/IL1A/CNR1/IL1B/SLC27A1/EDNRB/TNFRSF11A/PTGS2/NMU/TNF	10
GO:0060428	lung epithelium development	16/812	0.000154637	0.001554338	0.001071017	FGFR2/FGF10/HOXA5/AGR2/BMP4/SOX9/NKX2-1/STRA6/ASCL1/SHH/ADAMTSL2/GRHL2/SPDEF/FOXA1/FOXJ1/WNT7B	16
GO:0032496	response to lipopolysaccharide	84/812	0.000155239	0.001557878	0.001073456	TAC1/TBXA2R/NOS2/MGST1/FMO1/SLC11A1/ABCC2/TNIP3/CASP8/SBNO2/FGFR2/FGF10/OPRK1/GSTP1/NOS1/NFKBIA/HCK/MAPK3/HDAC5/OPRM1/PDE4D/PLSCR4/FOXP1/CNR1/GHSR/PTGFR/IL1B/CCR7/EPO/PTPN22/HAVCR2/EDNRB/IL1RN/CASP1/SMAD6/TNFRSF11A/SNCA/STAR/LCN2/NOTCH1/IL18/BMP6/PRKCA/ABR/ALPL/VCAM1/CAPN2/HPGD/GJB2/TNIP2/PTAFR/FOS/PRKCE/PENK/PDE4B/HSF1/SIGIRR/ATP4B/LITAF/SRC/ELANE/LYN/PTGS2/P2RX7/CEBPE/LILRB1/CCL2/PF4V1/IL10RA/L…	84
GO:0030316	osteoclast differentiation	32/812	0.000156069	0.001563697	0.001077466	SBNO2/CLDN18/GNAS/EFNA2/SFRP1/TCIRG1/IL23A/FOXP1/GLO1/TNFRSF11A/EPHA2/POU4F2/POU4F1/LRRK1/CARTPT/FBN1/FOS/FAM20C/CSF1R/ANXA2/MITF/NF1/SRC/MAFB/BGLAP/SNX10/LILRB1/CCR1/DCSTAMP/LILRB4/LILRB3/TNF	32
GO:0032872	regulation of stress-activated MAPK cascade	64/812	0.000157662	0.00157712	0.001086716	WNT16/SPAG9/FLT4/MAP4K4/PHLPP1/OPRK1/GSTP1/MECOM/MAPK3/AXIN1/SFRP1/STK3/RAPGEF1/FZD10/EPHA4/DUSP1/MAPK8IP1/UNC5CL/KLHL31/IL1B/CCR7/MAP2K2/TRAF2/PTPN22/TAOK3/IL1RN/MAPK8IP3/IGF1R/TNFRSF11A/MAP3K6/SFRP2/EGFR/MFHAS1/PAK1/FOXO1/TNIK/SH3RF1/EPHB1/TIAM1/SH3RF2/GDF6/XDH/FGF19/HAND2/GRIK2/ULK4/ZEB2/SH3RF3/TLR6/LEP/HRAS/ERN1/MAP3K5/FCGR2B/MAP4K1/ERN2/MARVELD3/FGD2/NCF1/F2RL1/PBK/RASGRP1/WNT7B/TNF	64
GO:0036037	CD8-positive, alpha-beta T cell activation	12/812	0.000159375	0.001584106	0.001091529	RUNX3/CBFB/MAPK8IP1/PAX1/SH3RF1/RUNX1/EOMES/BCL2/LILRB1/TNFSF8/NCKAP1L/GPR18	12
GO:0060445	branching involved in salivary gland morphogenesis	12/812	0.000159375	0.001584106	0.001091529	PLXND1/BTBD7/FGFR2/FGF10/SEMA3C/FGFR1/LAMA1/FGF8/PLXNA1/SHH/ESRP2/TNF	12
GO:0072170	metanephric tubule development	12/812	0.000159375	0.001584106	0.001091529	SOX8/WWTR1/ACAT1/PAX2/CALB1/SOX9/PAX8/OSR1/FAT4/POU3F3/LIF/WNT7B	12
GO:0072243	metanephric nephron epithelium development	12/812	0.000159375	0.001584106	0.001091529	SOX8/WWTR1/ACAT1/PAX2/CALB1/SOX9/PAX8/OSR1/FAT4/POU3F3/LIF/WNT7B	12
GO:0007193	adenylate cyclase-inhibiting G protein-coupled receptor signaling pathway	30/812	0.000160572	0.001593202	0.001097797	OPRK1/PALM/HRH3/OPRM1/GRM6/NPR3/GNAI2/OPRD1/GRM4/ADCY4/ADCY3/GNAL/DRD2/ADCY8/ADCY9/GRIK3/NPY1R/ADCY1/GPR37/ADCY5/HTR1A/SSTR2/CHRM4/CHRM2/NPY2R/GRM7/GABBR1/S1PR3/P2RY12/HTR1D	30
GO:0021766	hippocampus development	28/812	0.000161311	0.001593202	0.001097797	NCOA1/LHX5/SLC32A1/PTPRS/GLI3/KCNA1/NR2E1/KDM6B/BCAN/NKX2-1/DLX1/TMEM108/EPHA5/FEZ1/KIRREL3/FEZF2/WNT3A/LMX1A/NEUROD1/MFSD2A/ZEB2/EMX2/DCLK2/ALK/CDK5R2/ID4/DAB1/NEFL	28
GO:0048708	astrocyte differentiation	28/812	0.000161311	0.001593202	0.001097797	SOX8/PAX6/LAMC3/MT3/MAPK3/SOX6/NR2E1/EPHA4/LRP1/SOX9/IL1B/NKX2-2/LDLR/NTRK3/TTBK1/EGFR/NOTCH1/TAL1/SHH/ID4/DAB1/MAPT/NF1/DLL1/MAG/LIF/C1QA/TNF	28
GO:0003215	cardiac right ventricle morphogenesis	11/812	0.000162652	0.00160138	0.001103432	ISL1/SEMA3C/PPP1R13L/GATA3/HAND1/NOTCH1/HAND2/TBX20/ZFPM2/NKX2-5/FOXH1	11
GO:0043586	tongue development	11/812	0.000162652	0.00160138	0.001103432	CYP26B1/GLI3/HOXC13/PRDM16/EGFR/HAND2/BNC2/NKX2-6/TBX1/SIX4/NTF4	11
GO:0050921	positive regulation of chemotaxis	41/812	0.000164225	0.001614321	0.001112349	CCL26/F7/FGF10/FGFR1/LGMN/MAPK3/MET/RARRES2/IL23A/CCR6/SMOC2/THBS4/F3/CCR7/KDR/DYSF/RAC1/ADAM10/NTRK3/CDH13/SLIT2/VEGFC/TIAM1/SMAD3/DSCAM/C3AR1/AZU1/CAMK1D/NTF3/STK39/BMPR2/CCR2/NCKAP1L/PLA2G7/CCR1/F2RL1/P2RY12/SCG2/S100A14/AIF1/CCL4	41
GO:0008543	fibroblast growth factor receptor signaling pathway	36/812	0.000170567	0.001668775	0.00114987	GPC1/FGFR2/FGF10/FGF22/FGF4/FGFR1/FGF9/MAPK3/GATA3/FGF8/SMOC2/FGF1/FGF12/RUNX2/FGFRL1/KL/SPRY2/FGF5/PRDM14/CREB3L1/FGF19/SPRY1/OTX2/HNRNPF/SHCBP1/FAM20C/GRB2/FLRT2/FGF3/SPRY4/FAT4/MIR1-1/TRIM71/ESRP2/ESRP1/FGFBP1	36
GO:0042035	regulation of cytokine biosynthetic process	36/812	0.000170567	0.001668775	0.00114987	MAP2K3/TRIB2/GATA3/IL1A/TNFRSF8/GHSR/IL1B/IGF2BP3/IRF4/CEBPG/IGF2BP1/PTAFR/AZU1/TLR6/ZFPM1/SIGIRR/ELANE/CARD11/PTPRC/HMOX1/TLR8/LILRB1/EBI3/CCR2/EREG/FOXJ1/RNF128/NLRP12/CYBB/CX3CR1/CLEC7A/TLR7/SPN/CD3E/LTB/TNF	36
GO:0045446	endothelial cell differentiation	36/812	0.000170567	0.001668775	0.00114987	COL23A1/TNFRSF1A/PTPRS/ETV2/MET/RAPGEF1/PDE4D/TJP2/BMP4/IL1B/KDR/KDM6B/NOTCH1/BMP6/NRG1/XDH/F11R/PDPN/SOX17/MYADM/ANXA2/COL18A1/CLDN5/DLL1/MIR1-1/SOX18/BMPR2/NOTCH4/MIR150/S1PR3/CEACAM1/ID1/MARVELD2/F2RL1/WNT7B/TNF	36
GO:0072593	reactive oxygen species metabolic process	74/812	0.00017334	0.001693249	0.001166734	CFLAR/NOS2/HDAC4/RORA/PAX2/HSP90AA1/GSTP1/HBQ1/NOX4/MT3/NOS1/GNAI2/CDKN1A/IL1B/IFI6/PXDN/SESN2/RAC1/TFAP2A/CYP1B1/FBLN5/DUOXA1/DUOXA2/DUOX2/SNCA/EGFR/FOXO1/DDAH1/XDH/FANCC/HK2/ITGB2/SLC18A2/SMAD3/DRD5/ITGAM/SLC25A33/BCL2/CD34/TLR6/LEP/SH3PXD2B/PARL/BNIP3/GRIN1/GRB2/NQO1/IMMP2L/MAPT/SLC30A10/BCO2/HBM/DDAH2/EIF6/PTGS2/P2RX7/NCF4/TPO/NCF2/ACE2/CD36/MMP3/NCF1/F2RL1/CYBB/NCF1C/CX3CR1/CLEC7A/ABCD2/NCF1…	74
GO:0010810	regulation of cell-substrate adhesion	59/812	0.000174923	0.001706043	0.00117555	EPHA3/LIMCH1/MAP4K4/SLC9A1/ITGA6/ANGPT2/FERMT1/ARHGEF7/FOXF1/SFRP1/AGR2/COL1A1/CORO1C/GCNT2/SMOC2/NID1/HOXA7/LRP1/CCR7/MACF1/KDR/RAC1/CDH13/TBCD/RASA1/DOCK5/NOTCH1/SPOCK1/THY1/PDPN/FBLN2/EDIL3/EGFLAM/SMAD3/FAM107A/NPNT/ONECUT1/PRKCE/BCL2/MYADM/EMILIN3/EFNA5/CIB1/NPY2R/VWC2/AJAP1/NF1/SRC/S100A10/ARL2/EMP2/ITGA3/CEACAM6/ONECUT2/CD36/PTPRO/NDNF/CD3E/MMP12	59
GO:0035150	regulation of tube size	43/812	0.000175677	0.001710723	0.001178774	CD38/TBXA2R/NOS1/CHGA/COMP/P2RX1/HRH2/ECE1/ADRA1A/DOCK4/KCNA5/TRPM4/MTNR1B/EDNRB/ADCYAP1/EGFR/DOCK5/HTR7/KCNMA1/ACE/NPPC/UCN/AVPR1A/PTAFR/DRD5/ADRA1B/PTPRM/LEP/FOXC2/HTR1A/SLC8A1/PLA2G6/ADRB3/HRH1/BMPR2/PTGS2/HMOX1/APOE/ACE2/F2RL1/ADORA2B/HTR1D/KEL	43
GO:0045058	T cell selection	19/812	0.000179655	0.001741315	0.001199854	TBX21/GLI3/GATA3/IL23A/CCR7/BCL11B/DOCK2/IRF4/CD1D/SHH/BCL2/ZFPM1/CARD11/PTPRC/ZAP70/CD3G/THEMIS/SPN/CD3E	19
GO:0060986	endocrine hormone secretion	19/812	0.000179655	0.001741315	0.001199854	TAC1/GAL/FGFR1/OPRK1/GNAS/RAB11FIP3/GATA3/POMC/IL1B/TBX3/CRHBP/CRH/BMP6/UCN/RAB8B/GALR1/LEP/FOXL2/KISS1	19
GO:0062237	protein localization to postsynapse	19/812	0.000179655	0.001741315	0.001199854	STX1B/CACNG7/KIF17/GHSR/SNAP25/ADAM10/CACNG8/DLG2/GRIP1/GRIN2C/GRASP/KIF5C/CPLX1/CLSTN1/HRAS/GRIN1/GPC6/SHISA6/CACNG3	19
GO:0042755	eating behavior	15/812	0.000182097	0.001762245	0.001214276	OPRK1/OPRM1/OPRD1/GHSR/TCF15/ATP8A2/UCHL1/NAPEPLD/NPY5R/TRH/LEP/CCK/BSX/NMU/GDF15	15
GO:0045453	bone resorption	23/812	0.00018446	0.001782356	0.001228133	CD38/IL20RA/CLDN18/NOX4/CSK/TCIRG1/RAC1/TNFRSF11A/EGFR/ADAM8/PRKCA/LRRK1/CARTPT/LTBP3/CSF1R/NF1/SRC/BGLAP/ITGB3/SNX10/P2RX7/IHH/DCSTAMP	23
GO:0097553	calcium ion transmembrane import into cytosol	42/812	0.000185649	0.001791068	0.001234136	NOS1/JPH4/ITPR3/NTSR1/CORO1A/TRPA1/GRIN2D/PDE4D/RAMP3/ITPR2/CCR7/PLCB2/PLCE1/SNCA/ANK2/DRD2/PLCH2/PLCB3/CACNA1C/THY1/JPH3/GRIN2C/TPCN2/PRKCE/GRIN1/SLC8A1/RASA3/RYR1/HTT/RYR2/RYR3/MIR1-1/LIME1/LYN/GRIN2B/PTPRC/P2RX7/CEMIP/JPH1/PLCH1/MCOLN2/CCR5	42
GO:0021532	neural tube patterning	17/812	0.00018939	0.001821533	0.001255128	PAX6/PAX7/GLI2/KDM2B/GLI3/FGF8/SUFU/BMP4/WNT3A/EN1/SHH/SOX17/GBX2/HES3/PTCH1/TRAF3IP1/FOXA1	17
GO:0045124	regulation of bone resorption	17/812	0.00018939	0.001821533	0.001255128	CD38/IL20RA/CLDN18/CSK/TNFRSF11A/EGFR/ADAM8/PRKCA/CARTPT/LTBP3/CSF1R/NF1/SRC/BGLAP/ITGB3/P2RX7/DCSTAMP	17
GO:0099175	regulation of postsynapse organization	32/812	0.000193363	0.001856877	0.001279482	NGEF/DNM1L/NRCAM/CBLN1/PTPRS/CAPRIN2/CUX2/EPHA4/NRP2/GHSR/ITPKA/ADAM10/NTRK3/TIAM1/CDH2/BAIAP2/NRXN1/SHISA7/SHISA6/IL1RAP/SIPA1L1/DNM3/ARC/GRIN2B/SRCIN1/FCGR2B/APOE/LILRB2/ABHD17C/SLC7A11/EFNA1/ZNF804A	32
GO:0050773	regulation of dendrite development	44/812	0.000196301	0.001879308	0.001294938	HECW1/SARM1/FSTL4/SEZ6/NGEF/CHRNA3/DNM1L/PTPRS/COBL/CPEB3/CAPRIN2/CUX2/NR2E1/TLX2/EPHA4/NEUROG3/ITPKA/ADAM10/SDK1/TNIK/TIAM1/SHANK1/SHANK2/CSMD3/SDC2/ALK/KNDC1/FBXW8/BAIAP2/GRIN1/CAMK1D/DCC/SEMA4D/SIPA1L1/DNM3/ARC/CUX1/CYFIP1/SRCIN1/BCL11A/RAB17/ID1/APOE/EFNA1	44
GO:0060041	retina development in camera-type eye	44/812	0.000196301	0.001879308	0.001294938	SOX8/PAX6/TFAP2B/LAMC3/PAX2/VSX1/LAMA1/CALB1/SLC17A7/LHX2/TCIRG1/TULP1/NR2E1/GRM6/GNAT1/NEUROD4/SOX9/RAB11FIP4/ATP8A2/PDGFRA/TFAP2A/CYP1B1/SIX3/DLX1/SDK1/POU4F2/THY1/MEGF11/SKI/LRP5/NEUROD1/HCN1/RET/PTF1A/DSCAM/PTPRM/IRX5/FJX1/COL4A1/DLL1/BMPR2/LHX1/USH1C/IHH	44
GO:0006937	regulation of muscle contraction	49/812	0.000197533	0.001888205	0.001301069	TBXA2R/KCNQ1/PKP2/HDAC4/CHRNA3/NOS1/SLC9A1/CHGA/SMAD7/P2RX1/KCNA1/PDE4D/TACR1/TNNI3K/TNNT2/ADRA1A/GHSR/DOCK4/TRPM4/TNNT3/MYBPC3/PLCE1/PDE5A/ANK2/DOCK5/CACNA1C/KCNMA1/ATP1A1/UCN/NPNT/PTAFR/TACR3/ADRA1B/SSTR2/CHRM2/SLC8A1/NKX2-5/SETD3/PDE4B/NPY2R/RYR2/MIR1-1/ACTN3/SCN4A/PTGS2/NMU/ACE2/ATP1B1/ADORA2B	49
GO:0048641	regulation of skeletal muscle tissue development	20/812	0.000200362	0.001912324	0.001317688	CYP26B1/GPC1/HDAC4/TLL2/MYF6/TWIST1/MYOD1/MEGF10/WNT3A/EPHB1/SHH/SOX17/SHOX2/BCL2/NR1D2/TBX1/DLL1/MIR1-1/ACTN3/SIX4	20
GO:0045778	positive regulation of ossification	30/812	0.000201047	0.001915933	0.001320175	TAC1/TP63/GNAS/GLI3/ZBTB16/RUNX2/BMP4/KL/TFAP2A/FBN2/OSR1/SFRP2/BMP6/LRP5/PKDCC/NPPC/OSR2/NELL1/SMAD3/NPNT/SOX11/FAM20C/CTNNBIP1/SLC8A1/IFITM1/BMPR2/CLIC1/P2RX7/MSX2/WNT7B	30
GO:1901653	cellular response to peptide	95/812	0.000201794	0.001920116	0.001323057	CFLAR/ARID1B/BCAR1/CAMK2A/SREBF1/ACTN2/GSTP1/AKR1B1/PXN/SLC9A1/SORBS1/LGMN/KLF5/SMPD3/TSC2/CSK/PIK3R2/GRB10/CRHR2/RARRES2/GCK/HDAC5/GAB1/TCIRG1/APOBEC1/CCND3/GNAI2/ITGA4/EPHA4/ARHGEF2/SOCS2/GHSR/LRP1/IL1B/ADCY4/MAP1B/PTPRE/KL/PTPN22/SORL1/ADCY3/LHCGR/IGF1R/CACNA1A/PARP1/CRHBP/STAR/PAK1/FOXO1/POU4F2/ADCY8/ADCY9/VCAM1/NKX6-1/ADCY1/GJB2/VWA2/RAB8B/FBN1/PRKCB/GRM5/IRS1/SLC25A33/ADCY5/TLR6/LEP/LPL/BAI…	95
GO:0060415	muscle tissue morphogenesis	28/812	0.00020455	0.001941606	0.001337864	PAX7/ISL1/MYOM2/PKP2/COL11A1/FGFR2/SIRT6/SMAD7/MYF6/HAND1/TNNT2/MYBPC3/NOTCH1/POU4F1/NRG1/ACTC1/TBX20/SHOX2/ZFPM2/FOXC2/ZFPM1/NKX2-5/TBX1/RXRA/MYH6/RYR2/MYOM3/FOXH1	28
GO:0060402	calcium ion transport into cytosol	46/812	0.000204674	0.001941606	0.001337864	NOS1/JPH4/ITPR3/NTSR1/CORO1A/TRPA1/GRIN2D/PDE4D/ADRA1A/RAMP3/ITPR2/CCR7/EPO/PLCB2/PLCE1/SNCA/ANK2/DRD2/PLCH2/PLCB3/CACNA1C/THY1/JPH3/GRIN2C/TPCN2/PRKCE/BCL2/GRIN1/SLC8A1/RASA3/P2RX2/RYR1/HTT/RYR2/RYR3/MIR1-1/LIME1/LYN/GRIN2B/PTPRC/P2RX7/CEMIP/JPH1/PLCH1/MCOLN2/CCR5	46
GO:0042326	negative regulation of phosphorylation	112/812	0.000212356	0.002011425	0.001385973	PAX6/MLXIPL/WWTR1/LMO3/HDAC4/TRIB2/SIRT6/GSTP1/MECOM/TESC/PTK6/SMAD7/TSC2/CSK/SFRP1/RASIP1/PIK3R2/PRKAG2/RAPGEF1/DVL1/SNX25/CORO1C/DUSP16/PDE4D/CBLB/EIF4G1/RGS4/DUSP1/MAPK8IP1/TWIST1/CDKN2C/PMEPA1/KLHL31/CDKN1A/BMP4/IL1B/CBFA2T3/SH3BP5/PTPN22/TAOK3/SPRY2/SORL1/SMAD6/IGF1R/NTRK3/RPTOR/CBLC/SLIT2/SNCA/SFRP2/IGFBP3/DRD2/FOXO1/GPD1L/PTPRR/THY1/ANGPT1/LRRK1/UCHL1/FLCN/GNAQ/SH3RF2/XDH/LRP5/RNF149/SPRY1…	112
GO:0050863	regulation of T cell activation	80/812	0.000212932	0.002013816	0.001387621	MAD1L1/CYP26B1/RUNX3/PRDM1/CBFB/TBX21/GLI2/NFATC2/SMAD7/CORO1A/CSK/GLI3/DOCK8/GATA3/ZMIZ1/ZBTB16/CD5/IL23A/IGFBP2/IL1RL2/MAPK8IP1/EFNB2/BMP4/IL1B/CCR7/EPO/PTPN22/VTCN1/HAVCR2/GPNMB/RAC1/IRF4/PDE5A/PAK1/IL18/ADAM8/THY1/SH3RF1/CD1D/RUNX1/VCAM1/SHH/CCDC88B/IL20RB/LEP/GRB2/EGR3/CLEC4G/PDCD1/SRC/CARD11/LYN/FCGR2B/CEACAM1/PTPRC/LILRB1/RASAL3/EBI3/TNFSF8/CCL2/ZAP70/TMEM131L/CCR2/SASH3/NCKAP1L/FOXJ1/LILR…	80
GO:0007266	Rho protein signal transduction	56/812	0.000217524	0.002044641	0.001408861	TRIO/PREX2/RASGRF1/NGEF/ARHGEF10L/CELSR1/ARHGEF1/ARHGEF7/ARHGEF10/ARHGEF18/RASIP1/MET/ARHGEF17/KCTD10/RASGRF2/ARHGEF2/ADRA1A/MCF2L/ARHGEF16/VAV3/ARHGEF4/RAC1/RHOF/CDH13/ARHGEF19/ABL2/TIAM2/GNA12/ITGB1/EPS8/FARP1/OBSCN/FGD5/FLCN/TIAM1/ABR/VAV2/PDPN/CDC42EP5/ROBO1/PLEKHG5/SPATA13/PLEKHG7/ITSN2/ARHGDIG/ITGA3/PLEKHG6/WAS/GPR18/APOE/EPS8L1/GPR65/FGD2/F2RL1/GPR35/EPS8L3	56
GO:1990845	adaptive thermogenesis	45/812	0.00021774	0.002044641	0.001408861	SIRT6/GNAS/SCD/ZNF423/NOVA2/GRB10/PHOX2B/LAMA4/NPR3/LEPR/G0S2/KDM6B/IRF4/SORL1/TLE3/IGF1R/ADCYAP1/PRDM16/PTH2R/PLAC8/PDGFC/LCN2/NOTCH1/IL18/ACSL1/ADAMTS5/FLCN/PLCL2/ACOT11/SLN/KSR2/LEP/CIDEA/FOXC2/HOXC10/EHMT1/HSF1/ADRB3/ESRRG/EBF2/ACTN3/CCR2/ID1/CD36/DIO2	45
GO:0003229	ventricular cardiac muscle tissue development	21/812	0.000217826	0.002044641	0.001408861	ISL1/PKP2/COL11A1/FGFR2/TBX5/SMAD7/PPP1R13L/HAND1/TNNT2/MYBPC3/TBX3/NOTCH1/POU4F1/NRG1/ZFPM2/FOXC2/NKX2-5/RXRA/MYH6/RYR2/FOXH1	21
GO:0060042	retina morphogenesis in camera-type eye	21/812	0.000217826	0.002044641	0.001408861	SOX8/TFAP2B/VSX1/CALB1/SOX9/ATP8A2/TFAP2A/SDK1/THY1/MEGF11/LRP5/HCN1/PTF1A/DSCAM/PTPRM/IRX5/FJX1/DLL1/LHX1/USH1C/IHH	21
GO:0003207	cardiac chamber formation	8/812	0.000219139	0.002044641	0.001408861	TBX5/HAND1/TBX2/NOTCH1/HAND2/TBX20/SOX11/NKX2-5	8
GO:0038180	nerve growth factor signaling pathway	8/812	0.000219139	0.002044641	0.001408861	CORO1A/RAPGEF1/NGF/BDNF/NTF3/MAGI2/NTRK1/NTF4	8
GO:0043383	negative T cell selection	8/812	0.000219139	0.002044641	0.001408861	GLI3/CCR7/DOCK2/SHH/PTPRC/ZAP70/THEMIS/CD3E	8
GO:0051481	negative regulation of cytosolic calcium ion concentration	8/812	0.000219139	0.002044641	0.001408861	LRP1/KCNA5/MTNR1B/DRD2/SMAD3/KCNK3/SLC8A1/RYR3	8
GO:0060442	branching involved in prostate gland morphogenesis	8/812	0.000219139	0.002044641	0.001408861	FGFR2/ESR1/SFRP1/BMP4/HOXD13/HOXB13/SHH/RXRA	8
GO:0003197	endocardial cushion development	18/812	0.00022115	0.002054193	0.001415443	ISL1/TBX5/FOXF1/FGF8/TBX2/TWIST1/SNAI1/BMP4/SOX9/GATA5/NOTCH1/MSX1/HEYL/TBX20/ROBO1/BMPR2/ERBB3/MSX2	18
GO:0010463	mesenchymal cell proliferation	18/812	0.00022115	0.002054193	0.001415443	FGFR2/FGF4/FGFR1/FGF9/FOXF1/PRRX1/BMP4/SOX9/OSR1/LRP5/MSX1/HAND2/SHH/SHOX2/CTNNBIP1/TBX1/FAT4/IHH	18
GO:0044060	regulation of endocrine process	18/812	0.00022115	0.002054193	0.001415443	TAC1/GAL/FGFR1/OPRK1/GNAS/RAB11FIP3/POMC/IL1B/CRHBP/CRH/BMP6/UCN/RAB8B/GALR1/LEP/FOXL2/F2RL1/KISS1	18
GO:0015718	monocarboxylic acid transport	47/812	0.000225004	0.002085269	0.001436856	ABCB4/NOS2/SLC6A13/ABCC2/NCOA1/SLC16A8/NTSR1/SLC32A1/PRKAG2/SLC6A12/SLC27A6/SLC16A7/FABP3/IL1B/SLC27A1/SLC6A11/SSTR4/STRA6/SLC16A3/TNFRSF11A/SLC10A4/DRD2/ACSL1/SLC16A1/SLC6A1/ACE/PROCA1/MFSD2A/SLC16A4/TRH/LEP/PLA2G6/RXRA/PLA2G2A/NF1/NMB/OC90/SLC5A8/PLA2G10/CEACAM1/P2RX7/APOE/SLC6A8/CD36/SLC27A2/PLA2G4F/AKR1C4	47
GO:0032956	regulation of actin cytoskeleton organization	86/812	0.000225164	0.002085269	0.001436856	TAC1/CCL26/CAPG/EPHA3/LIMCH1/CTNNA2/SPTB/ARHGEF10L/CELSR1/ADD2/FSCN1/ACTN2/CAPZB/NOX4/ASAP3/PXN/SLC9A1/HCK/CORO1A/COTL1/SFRP1/ARHGEF10/MET/FZD10/ACTR3/SPTBN1/RGS4/CIT/LRP1/CCR7/BAIAP2L2/ARPC1B/KANK4/PDGFRA/VILL/RAC1/SPTBN5/RHOF/NTRK3/ARHGEF19/ABL2/TMEFF2/SLIT2/EPHA5/IQGAP2/RASA1/PAK1/EPS8/FMN2/GRHL3/F11R/SPTBN4/SHANK1/SMAD3/CDC42EP5/FAM107A/PRKCE/SYNPO/SYNPO2/SH3PXD2B/HRAS/BAIAP2/GRB2/MYADM/FES/C…	86
GO:0019751	polyol metabolic process	38/812	0.00022823	0.002103687	0.001449547	MTMR7/INPP5A/IP6K2/SYNJ2/AKR1B1/MTMR2/ITPK1/NTSR1/IMPAD1/MINPP1/COQ3/DYSF/ITPKA/PLCB2/LHCGR/MYOF/PLCE1/SNCA/PLCH2/PLCB3/INPP1/PLCL2/SGPP2/MOGAT2/PTAFR/NUDT4/LEP/GALR2/PLCD1/HRH1/MOGAT3/PLCH1/PLEK/CD244/PCK1/CYP3A4/PLCD3/PLD4	38
GO:0001662	behavioral fear response	16/812	0.0002285	0.002103687	0.001449547	VDAC3/NR2E1/EIF4G1/ADCYAP1/CRH/UCN/GRIK2/NPAS2/NEUROD2/BCL2/HTR1A/PENK/NPY2R/GABRA5/CCK/APOE	16
GO:0031076	embryonic camera-type eye development	16/812	0.0002285	0.002103687	0.001449547	WNT16/PAX6/FGF10/PAX2/KDM2B/PPP1R13L/TBX2/TWIST1/ALDH1A2/TFAP2A/FOXF2/STRA6/SIX3/SOX11/TRAF3IP1/IHH	16
GO:0038083	peptidyl-tyrosine autophosphorylation	16/812	0.0002285	0.002103687	0.001449547	FGR/TNK2/PTK6/HCK/MAPK3/KDR/IGF1R/ABL2/EGFR/ACE/GREM1/SRC/NTRK1/LYN/BTK/SLA	16
GO:0018958	phenol-containing compound metabolic process	33/812	0.000231265	0.002126004	0.001464924	IYD/SNCB/AKR1B1/CRYM/OCA2/GATA3/DAO/GIPC1/PAX8/CYP2E1/DDC/DUOXA1/DUOXA2/DUOX2/SLC6A3/SNCA/STAR/DRD2/ITGB2/HAND2/ZEB2/TACR3/ITGAM/GPR37/BCL2/INSM1/HTR1A/FOXE1/BTBD9/TPO/PNMT/SLC7A11/DIO2	33
GO:0050670	regulation of lymphocyte proliferation	57/812	0.000231978	0.002126376	0.00146518	MAD1L1/CD38/TAC1/GAL/FGF10/NFATC2/CORO1A/IL23A/IGFBP2/MAPK8IP1/CDKN1A/BMP4/IL1B/EPO/VAV3/PTPN22/VTCN1/HAVCR2/GPNMB/PDE5A/IL18/WNT3A/SH3RF1/CD1D/VCAM1/SHH/CCDC88B/BCL2/IL20RB/LEP/SOX11/CLEC4G/CARD11/LYN/BTK/CD22/FCGR2B/PTPRC/LILRB1/RASAL3/EBI3/TNFSF8/ZAP70/TMEM131L/CCR2/SASH3/NCKAP1L/FOXJ1/LILRB2/IHH/MNDA/CD300A/CLECL1/SPN/CD3E/AIF1/LST1	57
GO:0032890	regulation of organic acid transport	22/812	0.000231987	0.002126376	0.00146518	HRH3/NTSR1/RGS4/FABP3/IL1B/SSTR4/TNFRSF11A/OSR1/SNCA/SLC6A1/NPY5R/AVPR1A/TRH/LEP/PLA2G6/CCK/GRM7/STK39/PLA2G10/P2RX7/KMO/ACE2	22
GO:0031032	actomyosin structure organization	55/812	0.000233811	0.002139951	0.001474534	CFLAR/TAC1/MYOM2/LIMCH1/ARHGEF10L/ACTN2/EPB41L3/NOX4/ASAP3/PXN/SLC9A1/SORBS1/SFRP1/ARHGEF10/MYH14/MET/PHACTR1/TNNT2/LDB3/CIT/TNNT3/VPS4A/MYH11/MYBPC3/PDGFRA/CAPN9/RAC1/FRMD6/ACTA1/TMEFF2/FAM171A1/PAK1/ITGB1/OBSCN/F11R/ACTC1/ZYX/SMAD3/SH3PXD2B/NKX2-5/MYO18A/SRC/MYH6/S100A10/MIR1-1/ANLN/WAS/NEBL/ARHGAP28/EPB41L4B/SIX4/GPR65/MYOM3/KRT8/KRT19	55
GO:0071902	positive regulation of protein serine/threonine kinase activity	84/812	0.00023779	0.002173188	0.001497436	SPAG9/MAP2K3/FGF10/FGFR1/TP73/NOX4/MAPKAPK5/FLT1/MAPK3/CSK/STK3/RAPGEF1/CCNY/FZD10/CCND3/FGF1/EPHA4/CCND2/FLT3/GRM4/BMP4/IL1B/MAP2K2/TRAF2/SLC27A1/TRAF7/NGF/TAOK3/SPRY2/PLCE1/PDE5A/EGF/MAPK8IP3/PDE6H/NTRK3/PIK3R5/RPTOR/TNFRSF11A/MAP3K6/SNCA/PDGFC/EGFR/PAK1/HMGA2/ADAM8/ACSL1/GRM1/TNIK/TIAM1/NRG1/CCNYL1/MST1R/CARTPT/RET/ZEB2/ROBO1/ALK/CDK5R2/MOS/TLR6/HRAS/ERN1/CSF1R/CIB1/NTF3/SRC/MAP3K5/ELANE/NTRK1…	84
GO:0048643	positive regulation of skeletal muscle tissue development	13/812	0.000241169	0.002194424	0.001512069	CYP26B1/GPC1/MYF6/MYOD1/WNT3A/SHH/SOX17/SHOX2/BCL2/TBX1/DLL1/MIR1-1/ACTN3	13
GO:0048668	collateral sprouting	13/812	0.000241169	0.002194424	0.001512069	FSTL4/PTPRS/COBL/DVL1/LRP1/NGF/WNT3A/ZEB2/BDNF/EFNA5/DCC/SEMA4D/CRABP2	13
GO:0072207	metanephric epithelium development	13/812	0.000241169	0.002194424	0.001512069	SOX8/WWTR1/ACAT1/PAX2/CALB1/SOX9/PAX8/OSR1/WT1/FAT4/POU3F3/LIF/WNT7B	13
GO:1904377	positive regulation of protein localization to cell periphery	23/812	0.000242936	0.002207288	0.001520933	EPHA3/SORBS1/ANXA13/CLIP3/AGR2/SPTBN1/RAMP3/LRP1/ARHGEF16/STAC2/EPHA2/STAC/EGFR/ITGB1/WNT3A/SQSTM1/CNST/PRKCE/DPP10/CIB1/ITGA3/PLS1/TNF	23
GO:0071496	cellular response to external stimulus	85/812	0.000243755	0.00221151	0.001523842	CYP24A1/CASP8/TNFRSF1A/HDAC4/SREBF1/GSTP1/NCOA1/DNM1L/SLC9A1/ITGA6/STK24/MAPK3/SFRP1/TNFRSF10A/COL1A1/DAP/EIF4G1/ITGA4/SLC2A1/TNFRSF8/CDKN1A/SOX9/IL1B/MYOD1/TRPM4/SESN2/PIK3C2B/RAC1/CASP1/RPTOR/SIK1/XPR1/SFRP2/EGFR/SLC39A4/LCN2/FOXO1/BAG3/BMP6/KCNB1/CBS/VCAM1/ATP1A1/CARTPT/AVPR1A/FAM107A/FOS/BCL2/LEP/LPL/BAIAP2/BNIP3/ULK1/DCTPP1/BHLHA15/PENK/FES/HSF1/GAS2L1/MAP3K5/MAP1LC3C/RYR3/BMPR2/MIR125B1/SIP…	85
GO:0030850	prostate gland development	19/812	0.000249019	0.002255989	0.00155449	FGFR2/FGF10/TP63/GLI2/ESR1/SFRP1/GLI3/BMP4/SOX9/HOXD13/NOTCH1/HOXB13/SHH/ID4/PLAG1/PTCH1/RXRA/SERPINB5/FOXA1	19
GO:0042108	positive regulation of cytokine biosynthetic process	24/812	0.000250866	0.002266146	0.001561488	IL1A/TNFRSF8/IL1B/IRF4/CEBPG/PTAFR/AZU1/TLR6/ZFPM1/ELANE/CARD11/PTPRC/HMOX1/TLR8/EBI3/CCR2/EREG/CYBB/CLEC7A/TLR7/SPN/CD3E/LTB/TNF	24
GO:0048747	muscle fiber development	24/812	0.000250866	0.002266146	0.001561488	CACNA2D2/MYOM2/HDAC4/COMP/MYF6/BMP4/MYOD1/MYH11/MYBPC3/DYSF/MYOF/ACTA1/UCHL1/SKI/SHOX2/BCL2/P2RX2/DNER/RYR1/MYH6/XK/NEBL/MYOM3/KEL	24
GO:0032944	regulation of mononuclear cell proliferation	57/812	0.000265508	0.00239494	0.001650235	MAD1L1/CD38/TAC1/GAL/FGF10/NFATC2/CORO1A/IL23A/IGFBP2/MAPK8IP1/CDKN1A/BMP4/IL1B/EPO/VAV3/PTPN22/VTCN1/HAVCR2/GPNMB/PDE5A/IL18/WNT3A/SH3RF1/CD1D/VCAM1/SHH/CCDC88B/BCL2/IL20RB/LEP/SOX11/CLEC4G/CARD11/LYN/BTK/CD22/FCGR2B/PTPRC/LILRB1/RASAL3/EBI3/TNFSF8/ZAP70/TMEM131L/CCR2/SASH3/NCKAP1L/FOXJ1/LILRB2/IHH/MNDA/CD300A/CLECL1/SPN/CD3E/AIF1/LST1	57
GO:0007530	sex determination	12/812	0.000268165	0.002415419	0.001664345	FGF9/AMH/TCF21/SOX9/NR5A1/DMRT1/DHH/PTGDR/FOXL2/WT1/SIX4/SOX3	12
GO:1901381	positive regulation of potassium ion transmembrane transport	17/812	0.000271216	0.002431737	0.00167559	KCNQ1/KCNH2/GAL/ACTN2/OPRK1/KCNA1/WNK4/KCNC1/ATP1B2/ANK2/WNK2/KCNC2/KCNE1/GALR2/LRRC55/MIR1-1/ATP1B1	17
GO:0003179	heart valve morphogenesis	20/812	0.000272557	0.002431737	0.00167559	TBX5/GATA3/TWIST1/SNAI1/BMP4/SOX9/FGFRL1/GATA5/NFATC1/SMAD6/STRA6/SLIT2/NOTCH1/HEYL/TBX20/ROBO1/ZFPM1/SLIT3/BMPR2/EFNA1	20
GO:0050885	neuromuscular process controlling balance	20/812	0.000272557	0.002431737	0.00167559	POU4F3/JPH4/TNR/MYO7A/POU4F2/POU4F1/JPH3/ABR/GRIN2C/SHANK1/CAMTA1/ADCY5/IGDCC3/NRXN1/GPR88/NEUROG1/HMX3/NEFL/USH1C/TIFAB	20
GO:0007638	mechanosensory behavior	9/812	0.000273035	0.002431737	0.00167559	NRXN2/STRA6/DRD2/CNTNAP2/NRXN1/NEUROG1/HTT/SLITRK6/TIFAB	9
GO:0009415	response to water	9/812	0.000273035	0.002431737	0.00167559	CD9/AKR1B1/LRP11/AVPR1A/COL18A1/NTRK1/SIPA1/PKD2L1/KRT8	9
GO:0021924	cell proliferation in external granule layer	9/812	0.000273035	0.002431737	0.00167559	RORA/GLI2/LHX5/EGF/RERE/SHH/GBX2/CEND1/LHX1	9
GO:0021930	cerebellar granule cell precursor proliferation	9/812	0.000273035	0.002431737	0.00167559	RORA/GLI2/LHX5/EGF/RERE/SHH/GBX2/CEND1/LHX1	9
GO:0003382	epithelial cell morphogenesis	15/812	0.000273483	0.002431737	0.00167559	COL23A1/FAT1/MET/HRH2/BCL11B/PALLD/FRMD6/ST14/COL18A1/NOTCH4/GRHL2/VSIG1/ID1/RAB25/IHH	15
GO:0019228	neuronal action potential	15/812	0.000273483	0.002431737	0.00167559	CACNA1G/CACNA1I/MYH14/P2RX1/KCNA1/FGF12/MTNR1B/ANK3/GRIK2/GPR88/CACNA1H/SCN8A/SCN4A/SCN11A/GPR35	15
GO:2000241	regulation of reproductive process	46/812	0.000280505	0.00249063	0.00171617	HDAC4/TRIP13/ESR1/SFRP1/STK3/AMH/LFNG/CCR6/TACR1/CNR1/DUSP1/SNAI1/BMP4/SOX9/HOXD13/ACVR1B/EDNRB/NR5A1/DMRT1/PDE5A/LHFPL2/GLRA1/PRDM14/NOTCH1/MSX1/NPPC/PLB1/SHH/PTAFR/TACR3/ZFPM2/PDE3A/MOS/OVOL1/CCDC36/GPR149/MAPK15/PHLDA2/WT1/CIB1/RXRA/HYAL3/CACNA1H/SRC/MSX2/LIF	46
GO:0001523	retinoid metabolic process	33/812	0.000282649	0.002506103	0.001726831	CYP26B1/GPC1/AKR1B1/CYP26A1/RARRES2/CYP2C18/RBP1/SDC1/LRP1/ALDH1A2/STRA6/CYP1B1/NAPEPLD/DHRS3/PLB1/CRABP1/SDC2/SDR16C5/LPL/GPC5/GPC6/AGRN/BCO2/CYP3A5/APOE/BCO1/CRABP2/CYP3A4/AKR1B10/AKR1C4/AKR1B15/UGT1A1/UGT1A8	33
GO:0003177	pulmonary valve development	11/812	0.000287681	0.002539895	0.001750116	TNFRSF1A/BMP4/NFATC1/SMAD6/STRA6/SLIT2/NOTCH1/HEYL/TBX20/ROBO1/BMPR2	11
GO:0032332	positive regulation of chondrocyte differentiation	11/812	0.000287681	0.002539895	0.001750116	GLI3/ZBTB16/SOX6/RUNX2/SOX9/BMP6/GDF6/PKDCC/SMAD3/ANXA2/HOXA11	11
GO:0051412	response to corticosterone	11/812	0.000287681	0.002539895	0.001750116	CDKN1A/FOSB/NTRK3/STAR/CRH/AVPR1A/FOS/TRH/NPAS4/NEFL/FOSL1	11
GO:0021885	forebrain cell migration	21/812	0.000291653	0.002567698	0.001769273	SYNE2/LAMB1/GLI3/LHX6/NR2E1/TNR/NKX2-1/SLIT2/EGFR/DRD2/FEZF2/NRG1/HTR6/ROBO1/EMX2/CDK5R2/FOXB1/DAB1/NRG3/POU3F3/P2RY12	21
GO:0060688	regulation of morphogenesis of a branching structure	21/812	0.000291653	0.002567698	0.001769273	SOX8/BTBD7/FGFR2/FGF10/PAX2/SIRT6/FGFR1/ESR1/SFRP1/BMP4/SOX9/PAX8/HOXD13/SHH/GDNF/SHOX2/RXRA/LHX1/SIX4/BCL11A/TNF	21
GO:0072077	renal vesicle morphogenesis	10/812	0.000292518	0.002568065	0.001769526	SOX8/PAX2/SALL1/BMP4/SOX9/PAX8/KIF26B/GDNF/LHX1/LIF	10
GO:0097094	craniofacial suture morphogenesis	10/812	0.000292518	0.002568065	0.001769526	FOXN3/FGF4/GLI3/TWIST1/BMP4/MMP16/FREM1/NEUROG1/MSX2/TIFAB	10
GO:0007584	response to nutrient	59/812	0.000297622	0.002609205	0.001797873	CYP26B1/TBXA2R/CYP24A1/F7/AACS/GSTP1/NCOA1/DNMT3B/CYP26A1/LIPG/SFRP1/P2RX1/ALDH3A1/COL1A1/PANX1/STC2/GNAI2/IGFBP2/KYNU/CNR1/IL1B/ALDH1A2/EPO/TRPM4/MAP1B/ASCL1/SFRP2/EGFR/STAR/ACSL1/SLC16A1/SST/ALPL/VCAM1/SLC6A19/LEP/LPL/BAIAP2/GRIN1/NQO1/PENK/FES/SLC8A1/HSF1/P2RX2/RYR3/MIR125B1/BGLAP/PTGS2/P2RX7/HMOX1/BCL11A/FOXA2/PDX1/ABCG8/CYBB/P2RY12/CD3E/UGT1A1	59
GO:0030856	regulation of epithelial cell differentiation	45/812	0.000299308	0.002620314	0.001805528	PAX6/WWTR1/TNFRSF1A/CBFB/TP63/PAX2/MMP9/ETV2/GATA3/HOXA7/BMP4/SOX9/IL1B/PAX8/TBX3/ASCL1/OSR1/NOTCH1/BMP6/XDH/RUNX1/NKX6-1/GDNF/ZEB2/SFN/CLDN5/PTCH1/FAT4/AJAP1/MAFG/DLL1/MIR1-1/NOTCH4/MIR150/S1PR3/LHX1/CEACAM1/GRHL2/ESRP1/MSX2/OVOL2/ID1/LIF/FOXJ1/TNF	45
GO:0030178	negative regulation of Wnt signaling pathway	57/812	0.000303353	0.002648297	0.00182481	HECW1/ISL1/WWTR1/PSMA4/DKK3/PTPRU/TLE2/NLK/FERMT1/FGF9/AXIN1/TSC2/SFRP1/DKK4/STK3/GRB10/GLI3/RAPGEF1/DVL1/RNF43/MDFI/TBX18/APC2/IGFBP2/MAD2L2/LRP1/SOX9/NFATC1/KREMEN2/BARX1/SIX3/TLE3/IGFBP4/SFRP2/NOTCH1/TCF7L2/FOXO1/DKK2/WIF1/PSMD6/SHH/SOX17/GREM1/NXN/AXIN2/CDH2/RNF213/CTNNBIP1/TSKU/NKX2-5/WWOX/SHISA6/MIR1-1/PSMB8/TMEM131L/APOE/PTPRO	57
GO:0097529	myeloid leukocyte migration	57/812	0.000303353	0.002648297	0.00182481	CCL26/CD9/LGMN/CHGA/FLT1/MAPK3/RARRES2/IL23A/THBS4/PDE4D/DUSP1/IL1B/CCR7/VAV3/DYSF/EDNRB/RAC1/IL1RN/TNFRSF11A/ITGA9/SLIT2/VEGFC/ADAM8/ITGB2/CXCR1/GREM1/PIK3CD/C3AR1/AZU1/CAMK1D/PDE4B/HRH1/LYN/CCL2/PF4V1/CSF3R/CCR2/NCKAP1L/CXCL6/ADGRE2/PLA2G7/PTPRO/MCOLN2/CCR1/CD300A/CX3CR1/P2RY12/SCG2/S100A14/AIF1/MMP28/CCL4/CCL15/CCL4L1/CCL3L1/CCL3L3/CCL14	57
GO:0007162	negative regulation of cell adhesion	74/812	0.000306434	0.002671453	0.001840765	MAD1L1/PLXND1/CD9/RUNX3/CBFB/MAP4K4/TBX21/PLXNA2/ANGPT2/SMAD7/GLI3/COL1A1/CORO1C/GCNT2/PLXNA1/TNR/MAD2L2/DUSP1/HOXA7/LRP1/BMP4/PODXL/PTPN22/VTCN1/HAVCR2/PLXNC1/GPNMB/IL1RN/ADAM10/CYP1B1/PDE5A/ADAMTS18/CDH13/TBCD/RASA1/NOTCH1/SPOCK1/BMP6/ANGPT1/MIA3/JAM2/RUNX1/SHH/B4GALNT2/FAM107A/DSCAM/DAB1/IL20RB/MYADM/CLEC4G/EFNA5/SEMA4D/AJAP1/NF1/SRC/SIPA1/PLXNA4/ARHGDIG/ERBB3/FCGR2B/CEACAM1/PTPRC/LILRB1/EPCAM…	74
GO:0007565	female pregnancy	53/812	0.000310453	0.002702721	0.001862311	CD38/ABCC2/PRDM1/EPN1/PGR/AKR1B1/MMP2/ESR1/ANGPT2/MMP9/MAPK3/STC2/IGFBP2/SLC2A1/CNR1/PRLHR/GHSR/RECK/IL1B/FOSB/EPO/HAVCR2/ACVR1B/ADCYAP1/CORIN/CRHBP/CRH/PRDM14/CAPN2/UCN/HPGD/GJB2/PNOC/FOS/BCL2/BSG/STOX2/LEP/PLA2G6/HSF1/RXRA/HMX3/BMPR2/EMP2/ITGA3/PTGS2/KLF1/LIF/IHH/TCF23/FOSL1/CLDN4/PSG5	53
GO:0030032	lamellipodium assembly	23/812	0.000317138	0.002753235	0.001897118	HDAC4/FSCN1/CAPZB/ABLIM1/ARHGEF7/VAV3/ARHGEF4/RAC1/CDH13/EPHA2/SLIT2/ITGB1/AUTS2/VAV2/ABLIM2/SPATA13/PARVB/MIR196A2/MIR196A1/CYFIP1/WAS/PTPRO/P2RY12	23
GO:0060135	maternal process involved in female pregnancy	23/812	0.000317138	0.002753235	0.001897118	PRDM1/PGR/AKR1B1/ESR1/ANGPT2/MAPK3/STC2/CNR1/GHSR/HAVCR2/GJB2/BSG/STOX2/PLA2G6/RXRA/HMX3/BMPR2/ITGA3/PTGS2/KLF1/LIF/IHH/TCF23	23
GO:0001890	placenta development	44/812	0.000319151	0.002766864	0.001906508	PRDM1/CASP8/FGFR2/NCOA1/MAPK3/STK3/ETV2/LHX3/MDFI/HAND1/STC2/LHX4/GHSR/SNAI1/ETNK2/EGFR/ST14/EOMES/GJB2/HTRA1/BSG/STOX2/LEP/GRB2/PHLDA2/ASCL2/SOCS3/HSF1/RXRA/PLCD1/GJB3/BMPR2/PTGS2/GRHL2/ITGB8/OVOL2/LIF/PLCD3/TCF23/KRT8/KRT19/FOSL1/WNT7B/GJB5	44
GO:0071241	cellular response to inorganic substance	58/812	0.000320916	0.002778308	0.001914395	CFLAR/SYT7/DPEP1/GUCA1A/SYT1/MT3/LGMN/MMP9/MAPK3/SMPD3/SYT10/KCNA1/RASAL1/MT2A/FOSB/TRAF2/SYT5/SLC41A1/SYT6/TFAP2A/SLC40A1/ADCY10/PARP1/SNCA/CRHBP/GLRA1/EGFR/STAR/DLG2/FOXO1/ANK3/BMP6/ADCY8/SHH/ADCY1/FBP1/KCNC2/FOS/KCNK3/NEUROD2/BNIP3/NQO1/HSF1/BACE1/RYR1/CACNA1H/SLC30A10/RYR3/SYT3/AOC1/SYT13/PTGS2/HMOX1/HVCN1/SYT8/MMP3/NCF1/CYBB	58
GO:0050886	endocrine process	28/812	0.000322968	0.002790735	0.001922957	TAC1/GAL/FGFR1/OPRK1/GNAS/RAB11FIP3/GATA3/POMC/ECE1/IL1B/TBX3/CORIN/CRHBP/CRH/BMP6/ACE/UCN/RAB8B/AVPR1A/GALR1/DRD5/LEP/FOXL2/RASL10B/ACE2/CPA3/F2RL1/KISS1	28
GO:0051955	regulation of amino acid transport	14/812	0.000323937	0.002790735	0.001922957	HRH3/NTSR1/RGS4/SNCA/SLC6A1/NPY5R/AVPR1A/TRH/LEP/CCK/GRM7/P2RX7/KMO/ACE2	14
GO:0035924	cellular response to vascular endothelial growth factor stimulus	24/812	0.00032414	0.002790735	0.001922957	MAP2K3/FLT4/FLT1/GAB1/SMOC2/NRP2/FLT3/KDR/PDGFRA/SPRY2/NOTCH1/VEGFC/ADAMTS12/ADAMTS3/XDH/VCAM1/ROBO1/ERN1/EGR3/CCBE1/MYO1C/DLL1/MIR196A2/MIR196A1	24
GO:0050918	positive chemotaxis	24/812	0.00032414	0.002790735	0.001922957	F7/FGF10/ANGPT2/CORO1A/TSC2/MET/FGF8/F3/LRP1/BMP4/KDR/GPNMB/NTRK3/CDH13/VEGFC/ROBO3/ANGPT1/SMAD3/GDNF/AZU1/NTF3/F2RL1/SCG2/CCL15	24
GO:0061035	regulation of cartilage development	25/812	0.000327824	0.002818563	0.001942132	GLI2/SMPD3/GLI3/NKX3-2/ZBTB16/SOX6/EFEMP1/RUNX2/BMP4/SOX9/ADAMTS12/BMP6/GDF6/PKDCC/GREM1/SMAD3/LTBP3/AXIN2/SHOX2/LEP/ANXA2/BMPR2/HOXA11/SCIN/RFLNA	25
GO:0001933	negative regulation of protein phosphorylation	103/812	0.000329582	0.002829784	0.001949863	PAX6/MLXIPL/WWTR1/LMO3/TRIB2/GSTP1/MECOM/TESC/PTK6/SMAD7/TSC2/CSK/SFRP1/RASIP1/PIK3R2/PRKAG2/RAPGEF1/DVL1/SNX25/CORO1C/DUSP16/PDE4D/CBLB/EIF4G1/RGS4/DUSP1/MAPK8IP1/TWIST1/CDKN2C/PMEPA1/KLHL31/CDKN1A/BMP4/IL1B/SH3BP5/PTPN22/TAOK3/SPRY2/SORL1/SMAD6/IGF1R/NTRK3/RPTOR/CBLC/SLIT2/SNCA/SFRP2/IGFBP3/DRD2/FOXO1/GPD1L/PTPRR/THY1/ANGPT1/LRRK1/UCHL1/FLCN/GNAQ/SH3RF2/XDH/LRP5/RNF149/SPRY1/WNK2/GREM1/GFRA2/PK…	103
GO:0002209	behavioral defense response	16/812	0.000331071	0.002834769	0.001953299	VDAC3/NR2E1/EIF4G1/ADCYAP1/CRH/UCN/GRIK2/NPAS2/NEUROD2/BCL2/HTR1A/PENK/NPY2R/GABRA5/CCK/APOE	16
GO:0051590	positive regulation of neurotransmitter transport	16/812	0.000331071	0.002834769	0.001953299	BAIAP3/SYT1/DNM1L/STX1B/NTSR1/CNR1/UNC13A/SNCA/DRD2/SLC6A1/CACNB2/TRH/P2RX7/STX1A/KMO/RAB3B	16
GO:0071248	cellular response to metal ion	52/812	0.000333721	0.002853546	0.001966237	SYT7/DPEP1/GUCA1A/SYT1/MT3/LGMN/MMP9/MAPK3/SMPD3/SYT10/KCNA1/RASAL1/MT2A/FOSB/SYT5/SLC41A1/SYT6/TFAP2A/SLC40A1/PARP1/SNCA/CRHBP/GLRA1/EGFR/STAR/DLG2/ANK3/BMP6/ADCY8/SHH/ADCY1/FBP1/FOS/KCNK3/NEUROD2/BNIP3/NQO1/HSF1/BACE1/RYR1/CACNA1H/SLC30A10/RYR3/SYT3/AOC1/SYT13/PTGS2/HMOX1/HVCN1/SYT8/NCF1/CYBB	52
GO:1903037	regulation of leukocyte cell-cell adhesion	77/812	0.000335225	0.002862479	0.001972392	MAD1L1/RUNX3/CD44/CBFB/TBX21/GLI2/SMAD7/CORO1A/CSK/GLI3/DOCK8/GATA3/ZMIZ1/ZBTB16/CD5/IL23A/ITGA4/IGFBP2/IL1RL2/EFNB2/BMP4/IL1B/CCR7/EPO/PTPN22/VTCN1/HAVCR2/GPNMB/RAC1/PDE5A/PAK1/IL18/ADAM8/THY1/MIA3/CD1D/RUNX1/ITGB2/VCAM1/SHH/CCDC88B/PTAFR/IL20RB/LEP/GRB2/EGR3/CLEC4G/PDCD1/SRC/ELANE/CARD11/LYN/FCGR2B/CEACAM1/PTPRC/LILRB1/RASAL3/EBI3/CCL2/ZAP70/TMEM131L/CCR2/SASH3/NCKAP1L/FOXJ1/LILRB2/TNFAIP8L2/IH…	77
GO:0002704	negative regulation of leukocyte mediated immunity	19/812	0.000340662	0.002900971	0.001998915	TBX21/SMAD7/FOXF1/C4BPB/HAVCR2/ABR/IL20RB/CLEC4G/CD84/FCGR2B/CEACAM1/PTPRC/HMOX1/LILRB1/CCR2/FOXJ1/CD300A/CR1/CLEC12B	19
GO:0035094	response to nicotine	19/812	0.000340662	0.002900971	0.001998915	CHRNA3/CHRNA4/CNR1/SLC6A3/STAR/DRD2/VCAM1/MSX1/NKX6-1/BCL2/PENK/CHRNG/NTRK1/HMOX1/KCNK1/PDX1/SLC7A11/CHRNA5/TNF	19
GO:1901890	positive regulation of cell junction assembly	32/812	0.000357454	0.003039824	0.002094592	MAP4K4/CBLN1/SFRP1/CUX2/SLITRK3/KDR/RAC1/NTRK3/EPHA2/LRTM1/THY1/EPHB1/CLSTN2/SLITRK5/SMAD3/CLSTN1/BDNF/SLITRK1/NRXN1/EFNA5/FLRT2/THBS2/SEMA4D/AGRN/IL1RAP/SEMA4A/S100A10/NTRK1/LRRC24/ACE2/EPHB3/SLITRK6	32
GO:0006171	cAMP biosynthetic process	7/812	0.000362987	0.003070139	0.00211548	ADCY4/ADCY3/ADCY10/ADCY8/ADCY9/ADCY1/ADCY5	7
GO:0021877	forebrain neuron fate commitment	7/812	0.000362987	0.003070139	0.00211548	PAX6/BCL11B/NKX2-1/TBR1/ASCL1/DLX1/FEZF2	7
GO:0070091	glucagon secretion	7/812	0.000362987	0.003070139	0.00211548	SYT7/PASK/CRH/UCN/CARTPT/LEP/FAM3D	7
GO:0098598	learned vocalization behavior or vocal learning	7/812	0.000362987	0.003070139	0.00211548	NRXN2/STRA6/CNTNAP2/NRXN1/NEUROG1/HTT/TIFAB	7
GO:0031667	response to nutrient levels	117/812	0.000366143	0.003091443	0.00213016	CYP26B1/TBXA2R/CYP24A1/F7/SREBF1/ACAT1/PAX2/SIRT6/AACS/GSTP1/NCOA1/MT3/DNM1L/DNMT3B/CYP26A1/LIPG/STK24/MAPK3/SFRP1/P2RX1/ALDH3A1/COL1A1/PANX1/OPRM1/DAP/STC2/GNAI2/EIF4G1/POMC/IGFBP2/KYNU/SLC2A1/CNR1/LRP11/GHSR/NPY/CDKN1A/IL1B/PRKCG/VGF/ALDH1A2/MYOD1/LDLR/EPO/TRPM4/SESN2/TBC1D5/MAP1B/PIK3C2B/SORL1/ASCL1/ADCYAP1/RPTOR/SIK1/XPR1/SFRP2/SLC22A3/EGFR/STAR/SLC39A4/LCN2/FOXO1/ACSL1/SLC16A1/SST/KCNB1/ALPL…	117
GO:0022029	telencephalon cell migration	20/812	0.000366496	0.003091443	0.00213016	SYNE2/LAMB1/GLI3/LHX6/NR2E1/TNR/NKX2-1/SLIT2/EGFR/DRD2/FEZF2/NRG1/HTR6/ROBO1/CDK5R2/FOXB1/DAB1/NRG3/POU3F3/P2RY12	20
GO:0051591	response to cAMP	31/812	0.000370314	0.003119433	0.002149447	KCNQ1/PTPRN/SREBF1/NOX4/HCN2/AQP8/RAPGEF1/ALDH3A1/COL1A1/SDC1/DUSP1/ITPR2/FOSB/VGF/CDO1/DUOX2/SLC6A3/CNGA3/CRHBP/STAR/HCN1/PTAFR/FOS/BSG/KCNE1/PENK/SLC8A1/WT1/AREG/PCK1/FOSL1	31
GO:0008045	motor neuron axon guidance	13/812	0.000378462	0.003179491	0.00219083	HOXA2/LHX3/FGF8/EPHA4/LHX4/EGR2/RAC1/SLIT2/NTNG1/KIF5C/SLIT1/PLXNA4/LHX1	13
GO:2000463	positive regulation of excitatory postsynaptic potential	13/812	0.000378462	0.003179491	0.00219083	RIMS1/STX1B/DVL1/CUX2/RGS4/SHANK1/SHANK2/NETO1/BAIAP2/RIMS2/GRIN1/NRXN1/STX1A	13
GO:0010632	regulation of epithelial cell migration	74/812	0.000381725	0.00320077	0.002205492	TAC1/TBXA2R/MAP2K3/FLT4/BCAR1/FGF10/MAP4K4/FGF4/FGFR1/ANGPT2/CARD10/LGMN/MMP9/ANGPT4/MET/MEOX2/GATA3/HDAC5/CORO1C/NR2E1/CCR6/SMOC2/FGF1/FOXP1/NRP2/BMP4/SOX9/MACF1/KDR/STARD13/DNAJA4/EPHA2/IQSEC1/PTPRG/SLIT2/DOCK5/NOTCH1/VEGFC/PTPRR/ANGPT1/PRKCA/BMPER/AMOTL1/PRKCE/PTPRM/FOXC2/CCBE1/CIB1/SP1/SEMA4A/NF1/SRC/MIR135B/MIR129-2/BMPR2/MIR200A/MIR200B/MIR10B/MIR150/MIR196A2/MIR196A1/EMP2/PDCD6/ITGB3/ITGA3…	74
GO:0032958	inositol phosphate biosynthetic process	17/812	0.000382021	0.00320077	0.002205492	IP6K2/NTSR1/ITPKA/PLCB2/LHCGR/PLCE1/SNCA/PLCH2/PLCB3/PLCL2/PTAFR/PLCD1/HRH1/PLCH1/PLEK/CD244/PLCD3	17
GO:0002886	regulation of myeloid leukocyte mediated immunity	21/812	0.000386486	0.003233845	0.002228282	FGR/FOXF1/ABR/ITGB2/PTAFR/ITGAM/FES/DNASE1/LYN/BTK/CD84/FCGR2B/HMOX1/CCR2/CXCL6/ADGRE2/PRAM1/DNASE1L3/F2RL1/CD300A/ADORA2B	21
GO:0045926	negative regulation of growth	65/812	0.000393591	0.003288884	0.002266207	PRDM11/FSTL4/IP6K2/GAL/SEMA3C/MAP2/TP73/KCNK2/MT3/TBX5/TLL2/LGMN/HNF4A/PTK6/SFRP1/STK3/PTPRS/RAI1/CAPRIN2/WWC1/STC2/TNR/RGS4/SOCS2/CDKN2C/CDKN1A/MT2A/BMP4/SH3BP4/SESN2/ACVR1B/SLIT2/PLAC8/SFRP2/NOTCH1/PAK1/WNT3A/FLCN/MSX1/APBB2/RYK/SOX17/FBP1/SMAD3/GNG4/BCL2/SLIT3/WT1/SEMA4B/PTCH1/DCC/SEMA4D/SEMA4A/MIR1-1/BMPR2/MIR200B/SIPA1/CDHR2/SEMA4G/MAG/BCL11A/GDF15/TMPRSS4/DCSTAMP/TRIM40	65
GO:0021955	central nervous system neuron axonogenesis	15/812	0.000401754	0.003352607	0.002310115	GLI2/HSP90AA1/PHOX2B/NR2E1/EPHA4/DCLK1/SLIT2/EPHB1/B4GALT5/SPTBN4/ZEB2/TSKU/DCC/PLXNA4/EPHB3	15
GO:0032729	positive regulation of interferon-gamma production	23/812	0.000410512	0.003416556	0.002354179	ISL1/SLC11A1/IL23A/PDE4D/IL1B/PTPN22/HAVCR2/IL18/CEBPG/HRAS/ZFPM1/PDE4B/TLR8/EBI3/CCR2/SASH3/CD244/CD226/CLEC7A/RASGRP1/TLR7/CD3E/TNF	23
GO:0051148	negative regulation of muscle cell differentiation	23/812	0.000410512	0.003416556	0.002354179	CFLAR/PRDM6/HDAC4/NFATC2/FGF9/HDAC5/SOX6/RGS4/NFATC1/NOTCH1/PAK1/MSX1/SHH/ANKRD2/RBPMS2/BDNF/TRIM72/BHLHA15/NKX2-5/DLL1/MIR200B/CEACAM5/EREG	23
GO:0050678	regulation of epithelial cell proliferation	92/812	0.000413508	0.003436908	0.002368203	CFLAR/CCL26/PAX6/ISL1/RUNX3/FLT4/PTPRN/FGFR2/FGF10/TP63/PAX2/SIRT6/FGFR1/PGR/LAMB1/TGM1/FGF9/FLT1/SFRP1/DLX5/HOXA5/GATA3/THBS4/FGF1/ITGA4/F3/NRP2/GHSR/TWIST1/EFNB2/BMP4/SOX9/SLURP1/BCL11B/KDR/ALDH1A2/DYSF/EDNRB/NKX2-8/CDH13/RPTOR/OSR1/SFRP2/EGFR/NOTCH1/TCF7L2/VEGFC/BMP6/PRKCA/WNT3A/XDH/SGPP2/SHH/OSR2/HTRA1/SMAD3/ROBO1/PTPRM/LEP/HRAS/SFN/SOX11/EGR3/TBX1/SP1/PTCH1/NF1/MIR135B/MIR129-2/BMPR2/SERPINB…	92
GO:0030166	proteoglycan biosynthetic process	24/812	0.00041558	0.003444952	0.002373745	EXTL3/XYLT1/B3GAT1/UST/HS3ST2/CHST8/HS3ST3B1/NCAN/BCAN/CHST12/CSGALNACT1/TCF7L2/ACAN/HS3ST6/CYTL1/CANT1/CHST11/GAL3ST3/CHST15/EXT1/HS6ST3/BMPR2/FOXL1/HS3ST5	24
GO:0055008	cardiac muscle tissue morphogenesis	24/812	0.00041558	0.003444952	0.002373745	ISL1/MYOM2/PKP2/COL11A1/FGFR2/SIRT6/SMAD7/HAND1/TNNT2/MYBPC3/NOTCH1/POU4F1/NRG1/ACTC1/TBX20/ZFPM2/FOXC2/ZFPM1/NKX2-5/RXRA/MYH6/RYR2/MYOM3/FOXH1	24
GO:0006801	superoxide metabolic process	25/812	0.00041676	0.003445583	0.00237418	NOS2/GSTP1/NOX4/MT3/GNAI2/FBLN5/DUOX2/EGFR/FANCC/ITGB2/ITGAM/SH3PXD2B/NQO1/IMMP2L/MAPT/NCF4/NCF2/CD36/NCF1/F2RL1/CYBB/NCF1C/CLEC7A/NCF1B/TNF	25
GO:1903779	regulation of cardiac conduction	25/812	0.00041676	0.003445583	0.00237418	NOS1/FXYD3/ITPR3/PDE4D/TNNI3K/SLC8A2/ITPR2/ATP1B2/TRPM4/CORIN/ANK2/FXYD4/NPPC/ATP1A1/STIM1/SLC8A1/NKX2-5/RYR1/RYR2/RYR3/MIR1-1/FXYD7/ACE2/ATP1A4/ATP1B1	25
GO:0001504	neurotransmitter uptake	18/812	0.000425202	0.003506093	0.002415875	NOS1/NTSR1/SLC6A2/RGS4/SYNGR3/SLC6A11/SNAP25/SLC6A3/SNCA/SLC22A3/DRD2/SLC6A1/SLC18A2/SLC6A5/GDNF/ITGB3/SLC7A11/RAB3B	18
GO:0043300	regulation of leukocyte degranulation	18/812	0.000425202	0.003506093	0.002415875	FGR/FOXF1/ABR/ITGB2/PTAFR/ITGAM/FES/LYN/CD84/FCGR2B/CEACAM1/HMOX1/CCR2/ADGRE2/PRAM1/F2RL1/CD300A/ADORA2B	18
GO:0006688	glycosphingolipid biosynthetic process	12/812	0.000433979	0.003549418	0.002445728	ST8SIA5/ST8SIA1/ST8SIA4/ST3GAL5/ST6GALNAC5/B4GALNT1/ST8SIA6/B4GALT5/UGT8/ST8SIA3/B3GALT4/FA2H	12
GO:0021952	central nervous system projection neuron axonogenesis	12/812	0.000433979	0.003549418	0.002445728	GLI2/NR2E1/EPHA4/DCLK1/SLIT2/EPHB1/SPTBN4/ZEB2/TSKU/DCC/PLXNA4/EPHB3	12
GO:0030325	adrenal gland development	12/812	0.000433979	0.003549418	0.002445728	DKK3/SALL1/PDGFRA/NR5A1/STRA6/ASCL1/CRH/SMAD3/INSM1/WT1/PBX1/NF1	12
GO:0050927	positive regulation of positive chemotaxis	12/812	0.000433979	0.003549418	0.002445728	F7/FGF10/F3/KDR/NTRK3/CDH13/VEGFC/SMAD3/AZU1/NTF3/F2RL1/SCG2	12
GO:0072202	cell differentiation involved in metanephros development	12/812	0.000433979	0.003549418	0.002445728	WWTR1/PAX2/SALL1/TCF21/BMP4/PAX8/OSR1/GDNF/CD34/FAT4/POU3F3/LIF	12
GO:2000311	regulation of AMPA receptor activity	12/812	0.000433979	0.003549418	0.002445728	CACNG7/CACNG8/CNIH3/SHANK1/SHANK2/GSG1L/CNIH2/SHISA7/SHISA6/ARC/SHISA9/CACNG3	12
GO:0046434	organophosphate catabolic process	39/812	0.000434437	0.003549418	0.002445728	MTMR7/DERA/PNPLA6/ENTPD2/NTHL1/PDE4A/INPP5A/ACAT1/NT5C2/SYNJ2/MTMR2/ACOT7/NTSR1/LIPG/GDPD3/SMPD3/PDE4C/PDE10A/PDE8B/PDE4D/PDE1A/NT5C1A/LDLR/APOC1/AMPD3/PDE5A/INPP1/GPD1L/XDH/NAPEPLD/LIPC/NUDT4/DCTPP1/PDE4B/PLA2G4E/INPP5F/PNLIPRP2/GDA/PLA2G4F	39
GO:0070663	regulation of leukocyte proliferation	59/812	0.000435783	0.003555763	0.0024501	MAD1L1/CD38/TAC1/GAL/FGF10/GSTP1/NFATC2/CORO1A/IL23A/IGFBP2/MAPK8IP1/CDKN1A/BMP4/IL1B/EPO/VAV3/PTPN22/VTCN1/HAVCR2/GPNMB/PDE5A/IL18/WNT3A/SH3RF1/CD1D/VCAM1/SHH/GREM1/CCDC88B/BCL2/IL20RB/LEP/SOX11/CLEC4G/CARD11/LYN/BTK/CD22/FCGR2B/PTPRC/LILRB1/RASAL3/EBI3/TNFSF8/ZAP70/TMEM131L/CCR2/SASH3/NCKAP1L/FOXJ1/LILRB2/IHH/MNDA/CD300A/CLECL1/SPN/CD3E/AIF1/LST1	59
GO:0006023	aminoglycan biosynthetic process	35/812	0.00045602	0.003716027	0.00256053	EXTL3/GPC1/SMPD3/XYLT1/HAS1/GCNT2/UST/SDC1/HS3ST2/HS3ST3B1/IL1B/NCAN/BCAN/CHST12/EGF/KERA/CSGALNACT1/ANGPT1/ACAN/B4GALT5/HS3ST6/SDC2/CHST11/CHST2/B3GNT8/GPC5/CHST15/EXT1/GPC6/AGRN/B3GNT9/CEMIP/GALNT5/B3GNT3/HS3ST5	35
GO:0032530	regulation of microvillus organization	8/812	0.000482229	0.003894013	0.002683171	FSCN1/PLD1/KLF5/PODXL/USH1C/CDHR2/CDHR5/PLS1	8
GO:0032536	regulation of cell projection size	8/812	0.000482229	0.003894013	0.002683171	NEFL/USH1C/XK/CDHR2/CDHR5/PLS1/WNT7B/KEL	8
GO:0043301	negative regulation of leukocyte degranulation	8/812	0.000482229	0.003894013	0.002683171	FOXF1/ABR/CD84/FCGR2B/CEACAM1/HMOX1/CCR2/CD300A	8
GO:0061430	bone trabecula morphogenesis	8/812	0.000482229	0.003894013	0.002683171	SBNO2/MMP2/SFRP1/COL1A1/FBN2/GREM1/SEMA4D/MSX2	8
GO:0072044	collecting duct development	8/812	0.000482229	0.003894013	0.002683171	TFAP2B/PAX2/AKR1B1/CALB1/BMP4/PAX8/NOTCH1/WNT7B	8
GO:0072182	regulation of nephron tubule epithelial cell differentiation	8/812	0.000482229	0.003894013	0.002683171	WWTR1/PAX2/GATA3/PAX8/OSR1/FAT4/LHX1/LIF	8
GO:0097152	mesenchymal cell apoptotic process	8/812	0.000482229	0.003894013	0.002683171	PAX2/SOX9/PAX8/ETV6/MSX1/SHH/TBX1/MSX2	8
GO:0051385	response to mineralocorticoid	14/812	0.000483822	0.003899135	0.0026867	CDKN1A/FOSB/NTRK3/PARP1/STAR/CRH/AVPR1A/FOS/TRH/NPAS4/SRC/NEFL/CYBB/FOSL1	14
GO:0010717	regulation of epithelial to mesenchymal transition	29/812	0.00048433	0.003899135	0.0026867	ISL1/WWTR1/EPHA3/TBX5/SMAD7/SFRP1/COL1A1/GCNT2/MAD2L2/TWIST1/SNAI1/BMP4/IL1B/NKX2-1/SFRP2/CRB2/NOTCH1/TCF7L2/TIAM1/PDPN/GREM1/SMAD3/AXIN2/ALX1/POFUT2/FOXA2/OVOL2/FOXA1/EFNA1	29
GO:0010842	retina layer formation	11/812	0.000484737	0.003899135	0.0026867	TFAP2B/CALB1/ATP8A2/TFAP2A/SDK1/MEGF11/PTF1A/DSCAM/PTPRM/FJX1/LHX1	11
GO:1904645	response to amyloid-beta	20/812	0.000487415	0.003914246	0.002697113	MMP2/LGMN/MMP9/ITGA4/EPHA4/RAMP3/LRP1/IGF1R/CACNA1A/PARP1/CACNA1B/VCAM1/GRM5/TLR6/BACE1/MIR200A/FCGR2B/CD36/MMP3/MMP12	20
GO:0051209	release of sequestered calcium ion into cytosol	37/812	0.00048787	0.003914246	0.002697113	NOS1/JPH4/ITPR3/NTSR1/CORO1A/TRPA1/PDE4D/ITPR2/CCR7/PLCB2/PLCE1/SNCA/ANK2/DRD2/PLCH2/PLCB3/CACNA1C/THY1/JPH3/TPCN2/PRKCE/SLC8A1/RASA3/RYR1/HTT/RYR2/RYR3/MIR1-1/LIME1/LYN/PTPRC/P2RX7/CEMIP/JPH1/PLCH1/MCOLN2/CCR5	37
GO:0045834	positive regulation of lipid metabolic process	42/812	0.000497109	0.00398325	0.00274466	FGR/MLXIPL/TNFRSF1A/EPHA8/SREBF1/SORBS1/EEF1A2/FLT1/SMPD3/FGF1/FABP3/GHSR/FLT3/TWIST1/IL1B/CCR7/LDLR/APOC1/SLC27A1/VAV3/PDGFRA/STAR/CCDC3/BMP6/SLC45A3/VAV2/CAPN2/AVPR1A/CYP7A1/IRS1/PRKCE/PNPLA2/ZBTB20/PLA2G6/SRC/LYN/PTGS2/AADAC/APOE/P2RY12/ABCD2/TNF	42
GO:0042119	neutrophil activation	116/812	0.000503799	0.004031683	0.002778033	FGR/ITGAL/MGST1/PGLYRP1/ALOX5/SLC11A1/DERA/CD44/ATP11A/KCNAB2/STK10/PLD1/HSP90AA1/GSTP1/FTL/MMP9/PYGB/DNAJC5/COTL1/CRISPLD2/HMOX2/P2RX1/TCIRG1/CD58/A1BG/ARHGAP9/UBR4/SLC44A2/SNAP25/AMPD3/DOCK2/TCN1/RAC1/ADAM10/RHOF/C1orf35/ARL8A/PLAC8/IQGAP2/LCN2/IL18/ADAM8/PTPRN2/EEF1A1/ABR/PDXK/ITGB2/S100A11/CXCR1/NFASC/PSMD6/ANPEP/PTAFR/ITGAM/CANT1/C3AR1/ORMDL3/AZU1/RAB37/ANXA2/AP2A2/TUBB/SERPINA1/ELANE/APRT/N…	116
GO:0010977	negative regulation of neuron projection development	44/812	0.000506852	0.004037608	0.002782115	CD38/FSTL4/NGEF/MAP4K4/CRMP1/SEMA3C/MAP2/MT3/STX1B/STMN2/PTPRS/DPYSL3/DGUOK/TLX2/EPHA4/TNR/LRP1/EFNB2/RAP1GAP2/PTPRG/SLIT2/TBX6/SPOCK1/THY1/WNT3A/RYK/DAB1/GAK/RGMA/SEMA4B/CIB1/DCC/SEMA4D/SEMA4A/DNM3/INPP5F/SEMA4G/MAG/BCL11A/ID1/KLK8/APOE/PTPRO/EFNA1	44
GO:1901861	regulation of muscle tissue development	44/812	0.000506852	0.004037608	0.002782115	CYP26B1/GPC1/FGFR2/HDAC4/FGFR1/TP73/KCNK2/TBX5/TLL2/FGF9/FGF8/SOX6/MYF6/RGS4/TBX2/TWIST1/EFNB2/BMP4/MYOD1/MEGF10/NOTCH1/PAK1/WNT3A/FLCN/EPHB1/NRG1/TBX20/SHH/SOX17/GREM1/SMAD3/SHOX2/ZFPM2/BCL2/NR1D2/NKX2-5/TBX1/FGF3/DLL1/MIR1-1/MIR200B/ACTN3/ERBB3/SIX4	44
GO:0060997	dendritic spine morphogenesis	21/812	0.000507127	0.004037608	0.002782115	NGEF/DNM1L/DVL1/CAPRIN2/CUX2/EPHA4/DOCK10/ITPKA/ADAM10/EPHB1/TIAM1/SHANK1/SHANK2/CTNND2/BAIAP2/SIPA1L1/DNM3/ARC/SRCIN1/EFNA1/EPHB3	21
GO:0071385	cellular response to glucocorticoid stimulus	21/812	0.000507127	0.004037608	0.002782115	CFLAR/ISL1/ABCC2/GSTP1/DNMT3B/FLT3/MYOD1/SSTR4/ADCYAP1/EGFR/STAR/CRH/FOXO1/GJB2/FAM107A/NPAS4/SSTR2/SMYD3/EIF4EBP1/PCK1/UGT1A1	21
GO:0097581	lamellipodium organization	27/812	0.000510289	0.004057611	0.002795899	CD44/HDAC4/FSCN1/CAPZB/ABLIM1/ARHGEF7/CORO1C/VAV3/ARHGEF4/RAC1/CDH13/EPHA2/SLIT2/ITGB1/AUTS2/VAV2/PDPN/ABLIM2/SPATA13/PARVB/SRC/MIR196A2/MIR196A1/CYFIP1/WAS/PTPRO/P2RY12	27
GO:0003014	renal system process	36/812	0.000515975	0.004097599	0.002823452	TAC1/TFAP2B/KCNQ1/CHRNA3/AKR1B1/LGMN/NPR3/GNAI2/SGK1/ADRA1A/BMP4/WNK4/ADCY4/EDNRB/ADCY3/CORIN/DRD2/ADCY8/KCNMA1/MYO1E/ADCY9/ADCY1/AVPR1A/BCL2/ADCY5/CD34/PRKAR1B/EMP2/SLC4A1/ITGA3/HNF1A/PTPRO/F2RL1/BTC/CYP4F12/CLDN4	36
GO:0001710	mesodermal cell fate commitment	10/812	0.000520948	0.004105315	0.002828769	PAX2/FGFR1/ETV2/BMP4/SFRP2/WNT3A/SOX17/FOXC2/TRIM15/HOXA11	10
GO:0032026	response to magnesium ion	10/812	0.000520948	0.004105315	0.002828769	SMPD3/KCNA1/SLC41A1/CNGA3/SNCA/ANK3/BMP6/FBP1/KCNC2/RYR3	10
GO:0045956	positive regulation of calcium ion-dependent exocytosis	10/812	0.000520948	0.004105315	0.002828769	CACNA1G/SYT7/SYT1/CACNA1I/SYT10/KCNB1/CDK5R2/HYAL3/CACNA1H/STX1A	10
GO:0060231	mesenchymal to epithelial transition	10/812	0.000520948	0.004105315	0.002828769	PAX2/SALL1/GATA3/BMP4/PAX8/TCF15/GDNF/BASP1/WT1/LIF	10
GO:0060973	cell migration involved in heart development	10/812	0.000520948	0.004105315	0.002828769	SEMA3C/TBX5/NDRG4/BVES/TWIST1/BMP4/NOTCH1/PITX2/HAND2/MIR1-1	10
GO:2000696	regulation of epithelial cell differentiation involved in kidney development	10/812	0.000520948	0.004105315	0.002828769	WWTR1/PAX2/MMP9/GATA3/PAX8/OSR1/GDNF/FAT4/LHX1/LIF	10
GO:0002703	regulation of leukocyte mediated immunity	55/812	0.00052155	0.004105315	0.002828769	FGR/NOS2/TBX21/SMAD7/FOXF1/GATA3/IL23A/MAD2L2/C4BPB/IL1B/TRAF2/TRPM4/HAVCR2/IL18/CD1D/ABR/ITGB2/TNFSF13/PTAFR/ITGAM/IL20RB/LEP/FES/CLEC4G/CADM1/DNASE1/HLA-B/LYN/BTK/WAS/CD84/FCGR2B/CEACAM1/PTPRC/P2RX7/HMOX1/LILRB1/IL18RAP/CCR2/SASH3/CXCL6/ADGRE2/FOXJ1/ULBP2/PRAM1/CD226/DNASE1L3/F2RL1/CD300A/ADORA2B/RASGRP1/CR1/NCR3/TNF/CLEC12B	55
GO:0001946	lymphangiogenesis	9/812	0.000527265	0.004129467	0.002845411	FLT4/EPHA2/VEGFC/PTPN14/PDPN/FOXC2/CCBE1/SOX18/BMPR2	9
GO:0006837	serotonin transport	9/812	0.000527265	0.004129467	0.002845411	NOS1/HRH3/P2RX1/SNCA/CRH/SLC18A2/HTR1A/ITGB3/LILRB1	9
GO:0016540	protein autoprocessing	9/812	0.000527265	0.004129467	0.002845411	PCSK2/CASP1/PARP1/CAPN2/TMPRSS2/MYRF/F12/KLK6/CTSE	9
GO:0021534	cell proliferation in hindbrain	9/812	0.000527265	0.004129467	0.002845411	RORA/GLI2/LHX5/EGF/RERE/SHH/GBX2/CEND1/LHX1	9
GO:0010863	positive regulation of phospholipase C activity	17/812	0.000529813	0.004139041	0.002852008	FGFR1/ESR1/FLT1/ADRA1A/PDGFRA/PLCB2/NTRK3/ABL2/EGFR/GNAQ/AVPR1A/PTAFR/HRAS/BDNF/NTF3/P2RY12/NTF4	17
GO:0043616	keratinocyte proliferation	17/812	0.000529813	0.004139041	0.002852008	WNT16/FGF10/TP63/TGM1/FERMT1/EFNB2/SLURP1/BCL11B/CDH13/SDR16C5/SFN/PTCH1/AREG/IRF6/EREG/OVOL2/KLK8	17
GO:1900180	regulation of protein localization to nucleus	35/812	0.000544877	0.004251401	0.002929429	CLDN18/POLR1A/CARD10/FERMT1/PIK3R2/GLI3/SUFU/BMP4/SESN2/DCLK1/TRIM29/PARP1/MFHAS1/BAG3/ZIC1/ANGPT1/FLCN/CCT3/TERT/SHH/NOLC1/SMAD3/PKIG/DCLK2/LEP/NF1/SRC/RASSF5/PTGS2/LIF/CD36/PYHIN1/HCLS1/LILRB4/TRIM40	35
GO:0046631	alpha-beta T cell activation	40/812	0.000565802	0.004409162	0.003038135	RUNX3/PRDM1/CBFB/RORA/TBX21/SMAD7/GLI3/GATA3/ZBTB16/TCIRG1/IL23A/FOXP1/NKX2-3/MAPK8IP1/PAX1/BCL11B/DOCK2/IRF4/IL18/SH3RF1/RUNX1/EOMES/SHH/BCL2/ZFPM1/SEMA4A/PTPRC/LILRB1/RASAL3/EBI3/TNFSF8/ZAP70/CCR2/SASH3/NCKAP1L/GPR18/IHH/CD300A/SPN/CD3E	40
GO:0050855	regulation of B cell receptor signaling pathway	13/812	0.000576826	0.004483873	0.003089614	CBFB/FOXP1/PTPN22/CMTM3/PLCL2/RUNX1/PRKCB/PAX5/LYN/CD22/FCGR2B/CD300A/NFAM1	13
GO:0055075	potassium ion homeostasis	13/812	0.000576826	0.004483873	0.003089614	TFAP2B/KCNH2/ATP4A/SLC12A7/SLC12A5/ATP1B2/KCNA5/SLC12A9/KCNMA1/ATP1A1/ATP4B/ATP1A4/ATP1B1	13
GO:0048806	genitalia development	18/812	0.000577611	0.004484387	0.003089969	FGF10/TP63/ESR1/FGF8/HOXD13/PDGFRA/TBX3/FOXF2/STRA6/LHCGR/BMP6/SHH/NEUROG1/WT1/LHX1/SRD5A2/GREB1L/TIFAB	18
GO:0030510	regulation of BMP signaling pathway	29/812	0.000593762	0.004604055	0.003172426	TFAP2B/SMAD7/ZNF423/SFRP1/BMP4/SKIL/SORL1/SMAD6/PCSK6/DLX1/SFRP2/CRB2/NOTCH1/SKI/MSX1/BMPER/HTRA1/FBN1/RBPMS2/GREM1/SOX11/DAND5/TMPRSS6/VWC2/SMURF1/BMPR2/ITGA3/MSX2/TOB1	29
GO:0031345	negative regulation of cell projection organization	32/812	0.000619432	0.004797139	0.003305471	CD38/FSTL4/NGEF/MAP4K4/CRMP1/SEMA3C/CAPZB/MAP2/MT3/STX1B/STMN2/PTPRS/DPYSL3/DGUOK/TLX2/EPHA4/TNR/LRP1/EFNB2/RAP1GAP2/SPRY2/EVI5L/PTPRG/SLIT2/TBX6/SPOCK1/THY1/WNT3A/RYK/DAB1/GAK/RGMA/SEMA4B/CIB1/DCC/SEMA4D/SEMA4A/DNM3/INPP5F/MIR196A2/MIR196A1/GRIN2B/ITGA3/SEMA4G/MAG/BCL11A/ID1/KLK8/APOE/PTPRO/EFNA1	51
GO:0001678	cellular glucose homeostasis	43/812	0.000630498	0.004870756	0.003356196	BAIAP3/NADK/MLXIPL/PTPRN/MAP4K4/PAX2/AACS/OPRK1/NOX4/PIK3R2/GCK/LRP1/TRPM4/ANO1/RAC1/IGF1R/EPHA5/STAR/CRH/FOXO1/PTPRN2/ADCY8/TIAM1/HKDC1/KCNB1/HK2/LRP5/NEUROD1/CARTPT/FOXK1/CYP7A1/PRKCE/ADCY5/BRSK2/ERN1/ZBTB20/EFNA5/PLA2G6/PCK1/FOXA2/PDX1/HK3/FOXA3	43
GO:0016202	regulation of striated muscle tissue development	43/812	0.000630498	0.004870756	0.003356196	CYP26B1/GPC1/FGFR2/HDAC4/FGFR1/TP73/KCNK2/TBX5/TLL2/FGF9/FGF8/SOX6/MYF6/RGS4/TBX2/TWIST1/EFNB2/BMP4/MYOD1/MEGF10/NOTCH1/PAK1/WNT3A/EPHB1/NRG1/TBX20/SHH/SOX17/GREM1/SMAD3/SHOX2/ZFPM2/BCL2/NR1D2/NKX2-5/TBX1/FGF3/DLL1/MIR1-1/MIR200B/ACTN3/ERBB3/SIX4	43
GO:0006970	response to osmotic stress	27/812	0.000632028	0.00487654	0.003360182	FMO1/AKR1B1/MLC1/APOBEC1/EFHD1/ARHGEF2/SLC2A1/SLC12A5/EPO/MAP7/DYSF/LRRC8A/EGFR/HNMT/KCNMA1/SST/NOLC1/TACR3/LRRC8C/LRRC8D/STK39/PTGS2/KMO/MARVELD3/AQP5/RCSD1/TNF	27
GO:0050870	positive regulation of T cell activation	54/812	0.000639668	0.004929396	0.003396602	RUNX3/CBFB/GLI2/CORO1A/CSK/GLI3/DOCK8/GATA3/ZMIZ1/ZBTB16/CD5/IL23A/IGFBP2/IL1RL2/EFNB2/IL1B/CCR7/EPO/VTCN1/HAVCR2/RAC1/PAK1/IL18/ADAM8/THY1/CD1D/RUNX1/VCAM1/SHH/CCDC88B/LEP/GRB2/EGR3/PDCD1/SRC/CARD11/LYN/PTPRC/LILRB1/RASAL3/EBI3/CCL2/ZAP70/CCR2/SASH3/NCKAP1L/LILRB2/IHH/RASGRP1/CLECL1/BTLA/LILRB4/CD3E/AIF1	54
GO:0097120	receptor localization to synapse	20/812	0.000641465	0.004937145	0.003401942	STX1B/CACNG7/KIF17/GHSR/SNAP25/ADAM10/CACNG8/DLG2/GRIP1/GRASP/NETO1/KIF5C/CPLX1/CLSTN1/HRAS/CNIH2/GPC6/ANKS1B/SHISA6/CACNG3	20
GO:0051153	regulation of striated muscle cell differentiation	35/812	0.000648701	0.004986687	0.003436079	CYP26B1/CFLAR/HDAC4/NFATC2/HDAC5/EHD1/SOX6/MYF6/RGS4/EFNB2/BMP4/MYOD1/SIK1/NOTCH1/PAK1/WNT3A/NRG1/CAPN2/MSX1/SHH/ANKRD2/GREM1/SHOX2/BCL2/BDNF/TRIM72/BHLHA15/NKX2-5/TBX1/DLL1/MIR1-1/MIR200B/CEACAM5/GDF15/CD53	35
GO:0042596	fear response	16/812	0.00065873	0.005051344	0.00348063	VDAC3/NR2E1/EIF4G1/ADCYAP1/CRH/UCN/GRIK2/NPAS2/NEUROD2/BCL2/HTR1A/PENK/NPY2R/GABRA5/CCK/APOE	16
GO:0071526	semaphorin-plexin signaling pathway	16/812	0.00065873	0.005051344	0.00348063	PLXND1/SEMA3C/PLXNA2/MET/PLXNA1/NRP2/PLXNC1/RAC1/NCAM1/HAND2/GDNF/SEMA4B/SEMA4D/SEMA4A/PLXNA4/SEMA4G	16
GO:0006720	isoprenoid metabolic process	40/812	0.000662415	0.005067149	0.003491521	CYP26B1/GPC1/AKR1B1/CYP26A1/RARRES2/CYP2C18/RBP1/SDC1/LRP1/SRD5A3/ALDH1A2/CYP2E1/STRA6/CYP1B1/EGFR/STAR/CRH/NAPEPLD/DHRS3/PLB1/CRABP1/SDC2/SDR16C5/LPL/GPC5/GPC6/AGRN/BCO2/CYP3A5/APOE/HMGCS2/BCO1/CYP2C9/CRABP2/CYP3A4/AKR1B10/AKR1C4/AKR1B15/UGT1A1/UGT1A8	40
GO:0007189	adenylate cyclase-activating G protein-coupled receptor signaling pathway	40/812	0.000662415	0.005067149	0.003491521	TBXA2R/PTGER3/GNAS/NOS1/CHGA/OPRM1/PDE4D/GNAI2/ADRA1A/PTGFR/RAMP3/ADCY4/SSTR4/ADCY3/LHCGR/GNAL/ADCYAP1/DRD2/GPHA2/PRKCA/GPR26/GPR78/ADCY8/GNAQ/ADCY9/ADCY1/GALR1/DRD5/ADRA1B/ADRA1D/ADCY5/GALR2/ADRB3/MIR1-1/ADGRE2/ADGRE3/GPR65/ADGRF1/ADORA2B/ADGRE1	40
GO:0060840	artery development	31/812	0.000665123	0.005081634	0.003501502	PLXND1/TFAP2B/PRDM1/SMAD7/FOXF1/COMP/HOXA1/GLI3/FGF8/SUFU/ZMIZ1/PRRX1/TBX2/LRP1/EFNB2/BMP4/LDLR/SMAD6/STRA6/NOTCH1/HAND2/HPGD/SHH/ROBO1/LEP/FOXC2/TBX1/NF1/BMPR2/APOE/FOXH1	31
GO:0010996	response to auditory stimulus	12/812	0.000678432	0.005158067	0.003554168	NRXN2/KCNC1/ATP8A2/STRA6/DRD2/UCN/CNTNAP2/NRXN1/NEUROG1/HTT/SLITRK6/TIFAB	12
GO:0032957	inositol trisphosphate metabolic process	12/812	0.000678432	0.005158067	0.003554168	ITPK1/PLCB2/LHCGR/PLCE1/PLCH2/PLCB3/PLCL2/PTAFR/PLCD1/HRH1/PLCH1/PLCD3	12
GO:0035640	exploration behavior	12/812	0.000678432	0.005158067	0.003554168	CHRNA4/TNR/GAD1/CHL1/ABL2/CRH/JPH3/PRKCE/HTR1A/PENK/ITGA3/APOE	12
GO:0048596	embryonic camera-type eye morphogenesis	12/812	0.000678432	0.005158067	0.003554168	WNT16/PAX6/PAX2/KDM2B/TBX2/TWIST1/TFAP2A/FOXF2/STRA6/SIX3/SOX11/IHH	12
GO:0090288	negative regulation of cellular response to growth factor stimulus	46/812	0.000681566	0.00517559	0.003566242	CFLAR/GPC1/SMAD7/SFRP1/GATA3/SNX25/PMEPA1/RASL11B/SPRY2/NKX2-1/SKIL/SORL1/SMAD6/FBN2/PRDM16/DLX1/SLIT2/SFRP2/PRDM14/NOTCH1/ADAMTS12/CREB3L1/SKI/XDH/SPRY1/BMPER/HTRA1/FBN1/RBPMS2/GREM1/SMAD3/ONECUT1/CHST11/CIDEA/ZBTB7A/DAND5/TMPRSS6/SPRY4/VWC2/ADAMTSL2/SMURF1/MIR1-1/PDCD6/ONECUT2/TOB1/HTRA4	46
GO:0051283	negative regulation of sequestering of calcium ion	37/812	0.00068265	0.00517752	0.003567572	NOS1/JPH4/ITPR3/NTSR1/CORO1A/TRPA1/PDE4D/ITPR2/CCR7/PLCB2/PLCE1/SNCA/ANK2/DRD2/PLCH2/PLCB3/CACNA1C/THY1/JPH3/TPCN2/PRKCE/SLC8A1/RASA3/RYR1/HTT/RYR2/RYR3/MIR1-1/LIME1/LYN/PTPRC/P2RX7/CEMIP/JPH1/PLCH1/MCOLN2/CCR5	37
GO:0030516	regulation of axon extension	30/812	0.000695091	0.005265486	0.003628185	SEMA3C/MAP2/MT3/NRCAM/DPYSL2/PTPRS/TNR/LRP1/MACF1/MAP1B/NTRK3/BARHL2/PAK1/POU4F2/WNT3A/NKX6-1/RYK/ISLR2/DSCAM/CDH4/SEMA4B/MAPT/SEMA4D/SEMA4A/BMPR2/PLXNA4/CYFIP1/SEMA4G/MAG/APOE	30
GO:0048011	neurotrophin TRK receptor signaling pathway	14/812	0.000706146	0.005342746	0.003681421	BCAR1/CYFIP2/NGF/SPRY2/NTRK3/TMEM108/SPRY1/BDNF/GRB2/NTF3/SRC/NTRK1/CYFIP1/NTF4	14
GO:1902107	positive regulation of leukocyte differentiation	41/812	0.000722866	0.005462626	0.003764025	RUNX3/CASP8/CBFB/GLI2/GNAS/TESC/GLI3/GATA3/ZMIZ1/ZBTB16/IL23A/IL1RL2/ZBTB46/IL18/POU4F2/ADAM8/POU4F1/PRKCA/RUNX1/SHH/FOS/CTNNBIP1/EGR3/FES/TOX/BTK/PTPRC/ZAP70/SASH3/NCKAP1L/LIF/LILRB2/IL34/IHH/CCR1/DCSTAMP/RASGRP1/HCLS1/EVI2B/LILRB4/TNF	41
GO:1903539	protein localization to postsynaptic membrane	17/812	0.000724157	0.005465763	0.003766186	STX1B/CACNG7/GHSR/SNAP25/ADAM10/CACNG8/DLG2/GRIP1/GRIN2C/GRASP/CPLX1/CLSTN1/HRAS/GRIN1/GPC6/SHISA6/CACNG3	17
GO:0002793	positive regulation of peptide secretion	72/812	0.000760243	0.005731205	0.003949089	FGR/CD38/BAIAP3/NADK/ISL1/AACS/DNM1L/FERMT1/MAPK3/GCK/GATA3/PANX1/EXPH5/IL1A/SPTBN1/CD58/TWIST1/LRP1/IL1B/TRPM4/ANO1/PTPN22/VTCN1/GRP/HAVCR2/DHX9/RAC1/CASP1/ADCYAP1/TSLP/EGFR/CRH/TCF7L2/DRD2/VEGFC/FRMD4A/ADAM8/BMP6/ADCY8/NKX6-1/UCN/RAB8B/TRH/PRKCE/C1QTNF4/CD34/LPL/RPH3AL/CSF1R/CADM1/PLA2G6/NPY2R/IL1RAP/MYO18A/SRC/RASL10B/P2RX7/TLR8/KCNN4/CD33/NMU/CD244/PDX1/NLRP12/F2RL1/CLEC4E/KISS1/RASGRP1/AIF1/…	72
GO:0002063	chondrocyte development	18/812	0.000774766	0.005798669	0.003995575	COL11A1/SMPD3/IMPAD1/COMP/MATN4/RUNX2/SOX9/COL6A2/SFRP2/ACAN/VWA2/AXIN2/SHOX2/CHST11/COL14A1/BMPR2/MSX2/RFLNA	18
GO:0035272	exocrine system development	18/812	0.000774766	0.005798669	0.003995575	PLXND1/PAX6/BTBD7/FGFR2/FGF10/SEMA3C/FGFR1/LAMA1/FGF8/PLXNA1/SOX9/EGFR/SHH/PTF1A/ESRP2/PDX1/RAB26/TNF	18
GO:0043268	positive regulation of potassium ion transport	18/812	0.000774766	0.005798669	0.003995575	KCNQ1/KCNH2/GAL/ACTN2/OPRK1/KCNA1/WNK4/KCNC1/ATP1B2/ANK2/WNK2/KCNC2/KCNE1/GALR2/LRRC55/STK39/MIR1-1/ATP1B1	18
GO:0055010	ventricular cardiac muscle tissue morphogenesis	18/812	0.000774766	0.005798669	0.003995575	ISL1/PKP2/COL11A1/FGFR2/SMAD7/HAND1/TNNT2/MYBPC3/NOTCH1/POU4F1/NRG1/ZFPM2/FOXC2/NKX2-5/RXRA/MYH6/RYR2/FOXH1	18
GO:0060324	face development	18/812	0.000774766	0.005798669	0.003995575	MMP2/MAPK3/CRISPLD2/DLX5/COL1A1/HOXB3/CRISPLD1/ALDH1A2/PDGFRA/STRA6/SKI/MSX1/ANKRD11/TBX1/CLDN5/PAX9/GRHL2/SOX3	18
GO:1990573	potassium ion import across plasma membrane	18/812	0.000774766	0.005798669	0.003995575	KCNH2/HCN2/ATP4A/SLC12A7/KCNJ8/SLC12A5/WNK4/ATP1B2/SLC12A9/KCNJ1/KCNJ6/ATP1A1/WNK2/KCNK9/KCNJ12/ATP4B/ATP1A4/ATP1B1	18
GO:0030539	male genitalia development	11/812	0.000782986	0.005846167	0.004028304	FGF10/FGF8/HOXD13/PDGFRA/TBX3/LHCGR/BMP6/SHH/WT1/SRD5A2/GREB1L	11
GO:0032959	inositol trisphosphate biosynthetic process	11/812	0.000782986	0.005846167	0.004028304	PLCB2/LHCGR/PLCE1/PLCH2/PLCB3/PLCL2/PTAFR/PLCD1/HRH1/PLCH1/PLCD3	11
GO:0007179	transforming growth factor beta receptor signaling pathway	53/812	0.000783962	0.005846466	0.00402851	CREBBP/DKK3/ITGA8/NLK/PXN/LTBP4/FERMT1/SMAD7/ARHGEF18/SNX25/GCNT2/GIPC1/PMEPA1/RASL11B/ACVR1B/NKX2-1/SKIL/SMAD6/FBN2/PRDM16/CGN/PARP1/FLCN/SKI/F11R/ZYX/HPGD/HTRA1/FBN1/SMAD3/LTBP3/NPNT/ONECUT1/FOS/CHST11/CIDEA/SOX11/ZBTB7A/DAND5/CLDN5/SRC/ADAMTSL2/SMURF1/BMPR2/GDF10/ITGA3/ONECUT2/ID1/GDF15/AMHR2/LEFTY2/FOXH1/HTRA4	53
GO:0070661	leukocyte proliferation	74/812	0.000794879	0.005920808	0.004079735	MAD1L1/CD38/TAC1/SLC11A1/GAL/FGF10/GSTP1/NFATC2/CORO1A/DOCK8/TCIRG1/IL23A/CCND3/NPR3/IGFBP2/MAPK8IP1/FLT3/CDKN1A/BMP4/IL1B/EPO/VAV3/PTPN22/VTCN1/DOCK2/HAVCR2/GPNMB/PDE5A/IL18/WNT3A/SH3RF1/PLCL2/CD1D/ACE/VCAM1/SHH/GREM1/CCDC88B/BCL2/IL20RB/LEP/SOX11/CLEC4G/CSF1R/CARD11/LYN/BTK/CD22/FCGR2B/PTPRC/P2RX7/LILRB1/RASAL3/EBI3/TNFSF8/ZAP70/TMEM131L/CCR2/SASH3/NCKAP1L/FOXJ1/LILRB2/CD180/IL34/IHH/MNDA/F2RL1…	74
GO:0046887	positive regulation of hormone secretion	37/812	0.000803616	0.005978747	0.004119658	CD38/TAC1/BAIAP3/NADK/ISL1/GAL/FGFR1/AACS/GCK/LRP1/TRPM4/ANO1/GRP/RAC1/ADCYAP1/EGFR/CRH/TCF7L2/DRD2/BMP6/ADCY8/NKX6-1/UCN/RAB8B/GALR1/TRH/PRKCE/LEP/SOX11/RPH3AL/FOXL2/PLA2G6/NMB/RASL10B/NMU/PDX1/KISS1	37
GO:0030514	negative regulation of BMP signaling pathway	19/812	0.000811528	0.006023256	0.004150327	SMAD7/SFRP1/SKIL/SORL1/SMAD6/DLX1/SFRP2/NOTCH1/SKI/BMPER/HTRA1/FBN1/RBPMS2/GREM1/DAND5/TMPRSS6/VWC2/SMURF1/TOB1	19
GO:0035176	social behavior	19/812	0.000811528	0.006023256	0.004150327	NRXN3/DVL1/NRXN2/NR2E1/ATXN1/GAD1/GRP/SHANK1/SHANK2/EN1/UCN/AVPR1A/CNTNAP2/NPAS4/GRIN1/NRXN1/TBX1/VPS13A/CX3CR1	19
GO:0032941	secretion by tissue	15/812	0.000816743	0.006047582	0.004167089	TAC1/FGF10/OPRK1/AGR2/NPR3/WNK4/UCN/CEL/PRKCE/NLRP6/NEUROG1/STK39/KCNN4/AQP5/TIFAB	15
GO:0086010	membrane depolarization during action potential	15/812	0.000816743	0.006047582	0.004167089	CACNA1G/KCNH2/HCN2/CACNA1I/TRPM4/ANK2/CACNA1C/ANK3/CACNB2/SLC8A1/CACNA1H/SCN8A/SCN4A/PTPN3/SCN11A	15
GO:0007492	endoderm development	25/812	0.000822327	0.006074512	0.004185645	LAMA3/COL11A1/MMP2/LAMB1/MMP9/FGF8/ITGA4/BMP4/COL5A1/COL4A2/NKX2-1/NOTCH1/HMGA2/ITGB2/EOMES/TBX20/SOX17/SMAD3/ONECUT1/EXT1/LAMB3/ARC/PAX9/LHX1/HOXC11	25
GO:0030500	regulation of bone mineralization	25/812	0.000822327	0.006074512	0.004185645	COMP/TWIST1/BMP4/SOX9/TRPM4/KL/TFAP2A/FBN2/OSR1/BMP6/PKDCC/OSR2/NELL1/GREM1/SMAD3/LTBP3/PHOSPHO1/FAM20C/SLC8A1/BMPR2/BGLAP/P2RX7/AHSG/CCR1/RFLNA	25
GO:0090183	regulation of kidney development	20/812	0.000835805	0.00616678	0.004249222	CFLAR/SOX8/WWTR1/PAX2/MMP9/GATA3/BMP4/SOX9/PAX8/OSR1/FLCN/SHH/RET/GDNF/BASP1/WT1/FAT4/LHX1/SIX4/LIF	20
GO:0061180	mammary gland epithelium development	24/812	0.000838328	0.006169972	0.004251422	FGFR2/FGF10/GLI2/PGR/ESR1/FOXF1/HOXA5/GATA3/TBX3/ELF5/EPHA2/LRP5/MSX1/ROBO1/FOXB1/CSF1R/PTCH1/SRC/ATP2C2/AREG/IRF6/MSX2/IQGAP3/WNT7B	24
GO:1990868	response to chemokine	30/812	0.000840514	0.006169972	0.004251422	CCL26/DOCK8/CCR6/DUSP1/CCRL2/CCR7/LRCH1/SLIT2/CXCR5/CXCR1/ROBO1/SLIT3/CIB1/STK39/CCL2/PF4V1/CCR2/CXCL6/TFF2/CCR5/CCR1/CX3CR1/CXCR6/GPR35/CCL4/CCL15/CCL4L1/CCL3L1/CCL3L3/CCL14	30
GO:1990869	cellular response to chemokine	30/812	0.000840514	0.006169972	0.004251422	CCL26/DOCK8/CCR6/DUSP1/CCRL2/CCR7/LRCH1/SLIT2/CXCR5/CXCR1/ROBO1/SLIT3/CIB1/STK39/CCL2/PF4V1/CCR2/CXCL6/TFF2/CCR5/CCR1/CX3CR1/CXCR6/GPR35/CCL4/CCL15/CCL4L1/CCL3L1/CCL3L3/CCL14	30
GO:0001574	ganglioside biosynthetic process	7/812	0.000847111	0.006169972	0.004251422	ST8SIA4/ST3GAL5/B4GALNT1/ST8SIA6/B4GALT5/ST8SIA3/B3GALT4	7
GO:0002887	negative regulation of myeloid leukocyte mediated immunity	7/812	0.000847111	0.006169972	0.004251422	FOXF1/ABR/CD84/FCGR2B/HMOX1/CCR2/CD300A	7
GO:0040015	negative regulation of multicellular organism growth	7/812	0.000847111	0.006169972	0.004251422	LGMN/RAI1/STC2/SOCS2/PLAC8/PTCH1/GDF15	7
GO:0045060	negative thymic T cell selection	7/812	0.000847111	0.006169972	0.004251422	GLI3/CCR7/DOCK2/SHH/PTPRC/ZAP70/CD3E	7
GO:0048672	positive regulation of collateral sprouting	7/812	0.000847111	0.006169972	0.004251422	LRP1/NGF/WNT3A/BDNF/EFNA5/SEMA4D/CRABP2	7
GO:0060272	embryonic skeletal joint morphogenesis	7/812	0.000847111	0.006169972	0.004251422	BMP4/COL2A1/OSR1/OSR2/SHOX2/HOXA11/HOXC11	7
GO:0060433	bronchus development	7/812	0.000847111	0.006169972	0.004251422	HOXA5/AGR2/BMP4/SOX9/ADAMTSL2/SPDEF/WNT7B	7
GO:1902563	regulation of neutrophil activation	7/812	0.000847111	0.006169972	0.004251422	ABR/ITGB2/PTAFR/ITGAM/FCGR2B/PRAM1/CD300A	7
GO:0051965	positive regulation of synapse assembly	23/812	0.000848966	0.006176274	0.004255764	CBLN1/CUX2/SLITRK3/NTRK3/LRTM1/EPHB1/CLSTN2/SLITRK5/CLSTN1/BDNF/SLITRK1/NRXN1/EFNA5/FLRT2/THBS2/SEMA4D/AGRN/IL1RAP/SEMA4A/NTRK1/LRRC24/EPHB3/SLITRK6	23
GO:0046579	positive regulation of Ras protein signal transduction	22/812	0.000853017	0.006198521	0.004271093	RASGRF1/FGF10/MAP4K4/RAPGEF1/EPO/NGF/RAC1/MMD2/NOTCH1/NRG1/DGKI/AUTS2/ROBO1/HRAS/GRB2/NTRK1/LYN/GPR18/GPR65/F2RL1/RASGRP1/GPR35	22
GO:0045137	development of primary sexual characteristics	58/812	0.000862648	0.006249242	0.004306043	SOX8/MGST1/PTPRN/HOXA9/PGR/NCOA1/TFAP2C/ESR1/COL9A3/BIK/FGF9/SALL1/SFRP1/AMH/LFNG/GATA3/FGF8/SDC1/TCF21/SOX9/VGF/PDGFRA/ACVR1B/NKX2-1/NR5A1/DMRT1/LHCGR/DHH/ADCYAP1/OSR1/SLIT2/SFRP2/LHFPL2/STAR/GAS2/LHX8/ZFPM2/BCL2/UTF1/LEP/GPR149/BASP1/IRX5/ZFP42/FOXL2/SLIT3/IMMP2L/WT1/HYAL3/SRC/NTRK1/HOXA10/NCOA4/SRD5A2/HOXA11/SIX4/EREG/AMHR2	58
GO:0045444	fat cell differentiation	58/812	0.000862648	0.006249242	0.004306043	SOX8/TFAP2B/WWTR1/TRIO/LMO3/RORA/FGF10/TRIB2/SREBF1/RUNX1T1/AACS/ITGA6/KLF5/SFRP1/STK3/CLIP3/RARRES2/GATA3/ZBTB16/EGR2/TRPM4/DYSF/SMAD6/WDFY2/JDP2/PRDM16/PLAC8/SFRP2/TCF7L2/HMGA2/FOXO1/CCDC3/WNT3A/WIF1/GDF6/CTBP1/NAPEPLD/LRP5/SMAD3/ZFPM2/VSTM2A/LRRC8C/ID4/LEP/SH3PXD2B/LPL/BNIP3/ZBTB7A/ZFPM1/LAMB3/GRK5/PSMB8/EBF2/GDF10/PTGS2/MSX2/ALOXE3/TNF	58
GO:0006024	glycosaminoglycan biosynthetic process	33/812	0.000863	0.006249242	0.004306043	EXTL3/GPC1/SMPD3/XYLT1/HAS1/GCNT2/UST/SDC1/HS3ST2/HS3ST3B1/IL1B/NCAN/BCAN/CHST12/EGF/KERA/CSGALNACT1/ANGPT1/ACAN/B4GALT5/HS3ST6/SDC2/CHST11/CHST2/GPC5/CHST15/EXT1/GPC6/AGRN/CEMIP/GALNT5/B3GNT3/HS3ST5	33
GO:0031280	negative regulation of cyclase activity	10/812	0.000879244	0.00635213	0.004376938	PALM/NPR3/GNAI2/EDNRB/GALR1/GALR2/CCR2/GPR87/PDZD3/P2RY13	10
GO:0048670	regulation of collateral sprouting	10/812	0.000879244	0.00635213	0.004376938	FSTL4/PTPRS/LRP1/NGF/WNT3A/BDNF/EFNA5/DCC/SEMA4D/CRABP2	10
GO:0042552	myelination	38/812	0.000883363	0.00637451	0.004392359	CD9/GPC1/EPB41L3/MTMR2/PLLP/ARHGEF10/EGR2/SBF2/DHH/NTRK3/ANK2/MARVELD1/NRG1/SKI/B4GALT5/NFASC/SERINC5/MAL/ID4/UGT8/POU3F1/NF1/SCN8A/OLIG2/XK/BCAS1/FA2H/MAG/MYRF/KLK8/ITGAX/MALL/MAL2/KLK6/SH3TC2/ABCD2/KEL/ZNF488	38
GO:0003214	cardiac left ventricle morphogenesis	8/812	0.000952776	0.006750544	0.004651465	TBX5/FOXF1/HAND1/SFRP2/NOTCH1/NPY5R/NPY2R/RYR2	8
GO:0009214	cyclic nucleotide catabolic process	8/812	0.000952776	0.006750544	0.004651465	PDE4A/PDE4C/PDE10A/PDE8B/PDE4D/PDE1A/PDE5A/PDE4B	8
GO:0021535	cell migration in hindbrain	8/812	0.000952776	0.006750544	0.004651465	CTNNA2/PLXNA2/PHOX2B/RERE/ITGB1/POU4F1/DAB1/CEND1	8
GO:0048678	response to axon injury	25/812	0.001018349	0.007118177	0.004904783	SARM1/ISL1/KCNK2/STK24/PTPRS/DPYSL3/EPHA4/TNR/LRP1/EPO/MAP1B/MAPK8IP3/NTRK3/PTPRF/DRD2/BCL2/RGMA/NTRK1/INPP5F/LYN/NEFL/MAG/KLK8/P2RY12/AIF1	25
GO:0071383	cellular response to steroid hormone stimulus	63/812	0.001020594	0.007125893	0.0049101	CFLAR/ISL1/ABCC2/LMO3/CBFB/RORA/TP63/PGR/GSTP1/NCOA1/DNMT3B/ESR1/HNF4A/AXIN1/SFRP1/NR2E1/FOXP1/FHL2/NR5A2/TCF21/FLT3/PMEPA1/CNOT1/BMP4/MYOD1/SSTR4/NR5A1/ABHD2/ADCYAP1/PARP1/NR1I2/EGFR/STAR/CRH/PAK1/FOXO1/POU4F2/GRIP1/RUNX1/PRMT2/ATP1A1/HEYL/GJB2/FAM107A/NPAS4/NR1D2/NR2C2/ZBTB7A/SSTR2/SMYD3/RXRA/EIF4EBP1/ESRRG/NCOR2/STRN3/SRC/NCOA4/PCK1/SCGB2A1/FOXA1/FOXH1/HNF4G/UGT1A1	63
GO:0048799	animal organ maturation	12/812	0.001028243	0.007163272	0.004935856	PAX2/XYLT1/GATA3/ALDH1A2/RET/GREM1/PHOSPHO1/LEP/SEMA4D/FAT4/RYR1/RFLNA	12
GO:0060259	regulation of feeding behavior	12/812	0.001028243	0.007163272	0.004935856	OPRK1/LEPR/CNR1/GHSR/NAPEPLD/UCN/TACR3/TRH/RXFP4/NPY2R/CCK/NMU	12
GO:0030307	positive regulation of cell growth	46/812	0.001030288	0.007169517	0.004940159	CD38/EXTL3/SYT1/RIMS1/KDM2B/SLC9A1/ADNP2/SFRP1/CACNG7/RASAL1/EIF4G1/LRP1/MACF1/INO80/UNC13A/MAP1B/NGF/ADAM10/NTRK3/RPTOR/SFRP2/EGFR/PAK1/POU4F2/WNT3A/UCN/AVPR1A/ISLR2/DSCAM/SLC25A33/BCL2/SFN/RIMS2/BDNF/CDH4/EFNA5/CIB1/MAPT/SEMA4D/ITSN2/SMURF1/BMPR2/SLC44A4/SYT3/CYFIP1/CRABP2	46
GO:0046661	male sex differentiation	44/812	0.001043151	0.007250943	0.004996265	SOX8/MGST1/DMRT3/FGF10/HOXA9/NCOA1/TFAP2C/ESR1/COL9A3/BIK/FGF9/SFRP1/AMH/GATA3/FGF8/SDC1/TCF21/SOX9/HOXD13/PDGFRA/TBX3/NKX2-1/NR5A1/DMRT1/LHCGR/DHH/SFRP2/LHFPL2/STAR/BMP6/SHH/ZFPM2/BCL2/UTF1/ZFP42/WT1/NTRK1/HOXA10/NCOA4/SRD5A2/HOXA11/SIX4/AMHR2/GREB1L	44
GO:1903524	positive regulation of blood circulation	24/812	0.00104481	0.007254396	0.004998645	CD38/TBXA2R/KCNQ1/CHGA/PDE4D/HRH2/RGS4/ADRA1A/TRPM4/EGFR/ATP1A1/UCN/AVPR1A/PTAFR/TACR3/ADRA1B/NKX2-5/HRH1/RYR2/MIR1-1/PTGS2/NMU/ACE2/F2RL1	24
GO:1903307	positive regulation of regulated secretory pathway	19/812	0.001060222	0.007353232	0.005066747	FGR/CACNA1G/SYT7/SYT1/DNM1L/CACNA1I/SYT10/CNR1/KCNB1/ITGB2/CACNB2/PTAFR/ITGAM/CDK5R2/HYAL3/CACNA1H/STX1A/F2RL1/ADORA2B	19
GO:0060070	canonical Wnt signaling pathway	81/812	0.001084258	0.007487544	0.005159295	HECW1/ISL1/WWTR1/PSMA4/DKK3/CDK14/PTPRU/TLE2/FGFR2/FGF10/RSPO4/FERMT1/FGF9/AXIN1/SFRP1/DKK4/STK3/DLX5/GLI3/RAPGEF1/DVL1/GATA3/FGF8/CCNY/COL1A1/CAPRIN2/FZD10/TBX18/APC2/IGFBP2/SDC1/BCL9/MAD2L2/RECK/SOX9/TRPM4/KREMEN2/EGF/TLE3/IGFBP4/SFRP2/EGFR/RSPO2/NOTCH1/TCF7L2/FOXO1/TCF7L1/LRRK1/WNT3A/DKK2/GNAQ/LRP5/PSMD6/RYK/SHH/SOX17/WNK2/GREM1/SMAD3/AXIN2/RSPO1/CTNND2/CDH2/PYGO1/ZBED2/GPC5/NKX2-5/MITF/RNF220…	81
GO:0007405	neuroblast proliferation	21/812	0.001084386	0.007487544	0.005159295	PAX6/FGFR2/NDE1/FGFR1/GLI3/KCNA1/ARHGEF2/NEUROD4/SIX3/ASCL1/DMRTA2/NOTCH1/VAX1/DRD2/VEGFC/WNT3A/SHH/OTP/ID4/NF1/CX3CR1	21
GO:0045123	cellular extravasation	21/812	0.001084386	0.007487544	0.005159295	ADD2/MADCAM1/SELPLG/ITGA4/ITGB7/ITGB1/ADAM8/THY1/ABR/ITGB2/VCAM1/PTAFR/PIK3CD/AZU1/LEP/ELANE/CCL2/CCR2/CX3CR1/SPN/TNF	21
GO:0003333	amino acid transmembrane transport	26/812	0.001209143	0.008275733	0.005702398	SLC7A9/SLC6A15/SLC17A6/NTSR1/SLC32A1/SLC7A5/SLC17A7/SLC6A12/RGS4/SLC25A2/SLC7A10/SLC6A6/LRRC8A/PDPN/SLC6A20/SLC6A18/SLC6A5/SLC38A8/SLC43A2/LRRC8C/LRRC8D/SLC6A19/SLC25A22/SLC7A4/SLC7A11/SLC6A14	26
GO:0033628	regulation of cell adhesion mediated by integrin	17/812	0.001299381	0.008777853	0.006048383	EPHA8/TESC/FERMT1/PODXL/CYP1B1/EPHA2/SFRP2/FERMT3/RET/FOXC2/CIB1/LYN/NCKAP1L/EFNA1/P2RY12/MUC1/CD3E	17
GO:0033077	T cell differentiation in thymus	23/812	0.001328353	0.008963869	0.006176558	NCAPH2/GLI2/GLI3/GATA3/CCR6/BMP4/CCR7/BCL11B/DOCK2/ADAM8/SHH/BCL2/EGR3/CARD11/MAFB/PTPRC/ZAP70/TMEM131L/FOXJ1/CD3G/IHH/RASGRP1/CD3E	23
GO:0048814	regulation of dendrite morphogenesis	28/812	0.001343273	0.009050311	0.00623612	HECW1/SARM1/NGEF/CHRNA3/DNM1L/CAPRIN2/CUX2/NR2E1/TLX2/EPHA4/NEUROG3/ITPKA/ADAM10/TNIK/TIAM1/SDC2/KNDC1/FBXW8/BAIAP2/GRIN1/SEMA4D/SIPA1L1/DNM3/ARC/CUX1/SRCIN1/ID1/EFNA1	28
GO:0002931	response to ischemia	18/812	0.001345512	0.009050311	0.00623612	ARID1B/CAMK2A/PANX1/BVES/FAIM2/UCHL1/HK2/SQSTM1/GJB2/BCL2/CSF1R/CIB1/EIF4EBP1/P2RX2/MAP3K5/P2RX7/CX3CR1/NDNF	18
GO:1903793	positive regulation of anion transport	18/812	0.001345512	0.009050311	0.00623612	ABCB4/NTSR1/FABP3/IL1B/SSTR4/ATP8A2/TNFRSF11A/SLC6A1/AVPR1A/PTAFR/TRH/PLA2G6/CCK/PLA2G10/P2RX7/KMO/APOE/ACE2	18
GO:0032414	positive regulation of ion transmembrane transporter activity	31/812	0.001366992	0.009184895	0.006328855	GAL/ACTN2/TESC/SLC9A1/NTSR1/FGF14/STIM2/KCNA1/WNK4/KCNC1/ATP1B2/STAC2/STAC/ANK2/ANK3/WNK2/CACNB2/KCNC2/STIM1/PTAFR/GALR2/LRRC55/HTT/ARC/RYR2/STK39/MIR1-1/CACNG3/CCL2/CCR2/ATP1B1	31
GO:0051703	intraspecies interaction between organisms	19/812	0.001371175	0.009203093	0.006341395	NRXN3/DVL1/NRXN2/NR2E1/ATXN1/GAD1/GRP/SHANK1/SHANK2/EN1/UCN/AVPR1A/CNTNAP2/NPAS4/GRIN1/NRXN1/TBX1/VPS13A/CX3CR1	19
GO:0019229	regulation of vasoconstriction	20/812	0.001379498	0.009249006	0.006373031	CD38/TBXA2R/P2RX1/HRH2/ECE1/ADRA1A/DOCK4/KCNA5/TRPM4/EGFR/DOCK5/ACE/AVPR1A/PTAFR/ADRA1B/LEP/HRH1/BMPR2/PTGS2/ACE2	20
GO:0030168	platelet activation	42/812	0.001388927	0.009302237	0.00640971	CD9/ENTPD2/DGKG/TRPC7/DGKD/GNAS/ITPR3/MAPK3/COMP/P2RX1/COL1A1/VWF/ITPR2/PRKCG/VAV3/PDGFRA/ADAMTS18/PIK3R5/GNA12/FERMT3/PRKCA/WNT3A/GNAQ/DGKI/VAV2/PDPN/PRKCB/PRKCE/SRC/GP1BB/CLIC1/LYN/ITGB3/LCP2/CEACAM1/PF4V1/PLEK/APOE/SLC7A11/TREML1/CLEC1B/P2RY12	42
GO:0030010	establishment of cell polarity	38/812	0.001395071	0.009333366	0.006431159	CYP26B1/PAX6/FGF10/NDE1/FSCN1/MAP2/HSP90AA1/FERMT1/LAMA1/FOXF1/DOCK8/GATA3/UST/WWC1/ARHGEF2/TCF15/CCR7/MAP1B/LLGL1/DOCK2/NEK3/SPRY2/PAK1/FEZ1/MPP7/FRMD4A/EPHB1/KIF26B/SPRY1/SHH/AMOTL1/MOS/BRSK2/MYO18A/HTT/MISP/FOXJ1/SAPCD2	38
GO:0000302	response to reactive oxygen species	59/812	0.001404937	0.009340116	0.006435811	CFLAR/DPEP1/PTPRN/PAX2/GSTP1/MMP2/MT3/GNAO1/PXN/MMP9/STK24/MAPK3/SMPD3/TRPA1/MET/COL1A1/CAMKK2/SDC1/CRYGD/DUSP1/CCR7/TRAF2/KCNA5/CYP2E1/SESN2/KDM6B/PDGFRA/CYP1B1/FBLN5/EGFR/STAR/LCN2/FOXO1/FANCC/CAPN2/KCNC2/FOS/GPR37/BCL2/BNIP3/NQO1/SLC8A1/HSF1/MAPT/SRC/MAP3K5/BTK/NME8/HMOX1/AREG/IL18RAP/APOE/CD36/MMP3/NCF1/FOSL1/HBA2/HBA1/TNF	59
