# Supplementary material for: A Wavelet-Based Learning Model Enhances Molecular Prognosis in Pancreatic Adenocarcinoma
Source: Biomed Res Int. 2021 Oct 16;2021:7865856. doi: 10.1155/2021/7865856 (PMC8541860; doi:10.1155/2021/7865856)
Supplement: Supplementary Materials — Additional file 1: the performance comparison of the proposed method. Additional file 2: the detailed results of KEGG pathway analyses. Additional file 3: the detailed results of GO analysis on the BP term. Additional file 4: the detailed results of GO analysis on the CC term. Additional file 5: the detailed results of GO analysis on the MF term. Additional file 6: the validation of the proposed method on the STAD dataset. [file 7865856.f1.zip › Additional file 4.txt]

ID	Description	GeneRatio	pvalue	p.adjust	qvalue	geneID	Count
GO:0005911	cell-cell junction	44/805	8.25E-09	1.21E-06	1.08E-06	AOC1/WAS/LCP2/COL17A1/CLDN18/CEACAM1/GRHL2/P2RX7/EPB41L4B/MISP/CORO1A/PERP/ZAP70/SLC2A1/PPL/EPCAM/BAIAP2L2/CRB3/DSG3/MARVELD3/EPHA2/CD53/ATP1B1/CGN/MARVELD2/PCDH1/STEAP1/EVPL/GJB1/KRT8/PDZD3/THEMIS/CLDN7/IQGAP3/PKP3/SAPCD2/AMTN/GJB3/CLDN4/GJB5/GJB4/AJAP1/GJC2/CD3E	44
GO:0016324	apical plasma membrane	38/805	3.16E-09	6.98E-07	6.20E-07	NPC1L1/ERBB3/CDHR2/CEACAM1/AQP6/CEACAM6/CDHR5/SLC52A3/CEACAM5/SCNN1A/SLC2A1/EPCAM/RAB17/CRB3/ANO1/CD36/KCNK1/ATP1B1/ABCG8/MAL2/SLC39A4/PTPRO/MARVELD2/OTOA/CD300LG/AQP5/AMN/MYO1A/MUC17/KISS1/MUC13/SLC9A4/MUC1/SAPCD2/CYP4F12/CLDN4/AJAP1/SLC44A4	38
GO:0009897	external side of plasma membrane	37/805	2.22E-06	0.00013963	0.000123982	ITGA3/TNFRSF9/FCGR2B/PTPRC/P2RX7/TLR8/LILRB1/EBI3/CD33/CEACAM5/SDC1/F3/CSF3R/CCR2/CD244/ULBP2/CD36/STAB2/CD226/CD8A/ITGB2/CD3G/CCR5/AZGP1/VCAM1/CCR1/CX3CR1/P2RY12/MUC17/CXCR6/ADGRE1/FCRL6/DMBT1/CD3E/FCGR3A/TNF/CLEC12B	37
GO:0030667	secretory granule membrane	35/805	2.07E-08	2.28E-06	2.02E-06	ITGAL/MGST1/CEACAM1/PTPRC/CEACAM6/CD33/SIGLEC5/CYSTM1/HVCN1/NCKAP1L/CD68/SIGLEC9/LILRB2/ADGRE3/CD36/SLC27A2/ITGAX/CD53/DOK3/ITGB2/FCGR3B/TMEM184A/CYBB/CLEC4D/LAIR1/CD300A/RAB26/FPR1/CLEC12A/TBC1D10C/ABCA13/DMBT1/CR1/LILRB3/NFAM1	35
GO:0062023	collagen-containing extracellular matrix	30/805	0.001338752	0.02108534	0.018722393	LAMA3/ENTPD2/COL17A1/F3/SLPI/APOE/GDF15/F12/TINAG/LMAN1L/ADAMTS10/LEFTY2/AHSG/HAPLN1/LAD1/C1QC/AZGP1/CPA3/SHH/MUC17/LGALS4/TPSAB1/C1QB/C1QA/SNORC/AMTN/TPSB2/S100A6/COL6A6/MMP28	30
GO:0016323	basolateral plasma membrane	23/805	2.91E-05	0.000876539	0.000778309	SLC4A1/ITGA3/ERBB3/CDH17/CEACAM1/SLC4A11/VSIG1/CEACAM5/MET/CA9/SLC2A1/EPCAM/RAB17/ATP1B1/MARVELD2/CD300LG/AQP5/MYO1A/P2RY12/SLC9A4/CLDN7/CLDN4/AJAP1	23
GO:0098858	actin-based cell projection	19/805	0.000913948	0.017523957	0.015560119	ITGA3/USH1C/PLEKHG6/CDHR2/CEACAM1/CDHR5/PVALB/CA9/FOXA1/LCP1/MYO1G/AQP5/VCAM1/S100P/MYO1A/ANKS4B/TBC1D10C/BAIAP2/SPN	19
GO:0042581	specific granule	19/805	2.98E-05	0.000876539	0.000778309	AOC1/ITGAL/CEACAM1/CD33/HVCN1/SLPI/CHI3L1/CHIT1/DOCK2/TCN1/CD36/SLC27A2/CD53/ITGB2/CAMP/CYBB/CLEC4D/LAIR1/CLEC12A	19
GO:0001726	ruffle	17/805	0.00069518	0.013935203	0.012373542	FGR/PTK6/FERMT1/MEFV/COBL/PLEK/ADGRE2/EPS8L1/LCP1/EPHA2/FGD2/SAMSN1/PLA2G4F/BAIAP2/S100A6/EPS8L3/AIF1	17
GO:0098862	cluster of actin-based cell projections	16/805	0.000427972	0.008987408	0.007980226	USH1C/SCIN/NPC1L1/CDHR2/CDHR5/PVALB/MYH14/PLS1/ACE2/CD36/KCNK1/SLC7A11/AMN/MYO1A/PDZD3/ANKS4B	16
GO:0030863	cortical cytoskeleton	12/805	0.002787756	0.034150005	0.030322955	SLC4A1/ANLN/WAS/MISP/PVALB/CORO1A/MLPH/SLC2A1/PLS1/MYO1A/KRT19/HCLS1	12
GO:0005884	actin filament	12/805	0.001922002	0.027993768	0.024856622	WAS/MISP/HCK/CORO1A/COBL/PLS1/LCP1/PSTPIP1/MYO1A/HCLS1/RCSD1/AIF1	12
GO:0035579	specific granule membrane	12/805	0.000322456	0.007900162	0.007014823	ITGAL/CEACAM1/CD33/HVCN1/CD36/SLC27A2/CD53/ITGB2/CYBB/CLEC4D/LAIR1/CLEC12A	12
GO:0030864	cortical actin cytoskeleton	11/805	0.001079714	0.019046148	0.016911725	ANLN/WAS/MISP/PVALB/CORO1A/MLPH/SLC2A1/PLS1/MYO1A/KRT19/HCLS1	11
GO:0098636	protein complex involved in cell adhesion	7/805	0.000377392	0.008321497	0.007388941	ITGAL/ITGA3/ITGB8/ITGA4/ITGAX/ITGAD/ITGB2	7
GO:0009925	basal plasma membrane	7/805	0.000377392	0.008321497	0.007388941	ERBB3/CEACAM1/MET/AQP5/MYO1A/P2RY12/CLDN4	7
GO:0008305	integrin complex	7/805	0.00020522	0.005323651	0.004727051	ITGAL/ITGA3/ITGB8/ITGA4/ITGAX/ITGAD/ITGB2	7
GO:0045177	apical part of cell	44/805	6.89E-10	3.04E-07	2.70E-07	USH1C/MGST1/NPC1L1/ERBB3/CDHR2/CEACAM1/AQP6/SNX10/CEACAM6/EPB41L4B/CDHR5/SLC52A3/CEACAM5/SCNN1A/SLC2A1/EPCAM/RAB17/CRB3/ANO1/CD36/KCNK1/ATP1B1/ABCG8/MAL2/SLC39A4/PTPRO/MARVELD2/OTOA/CD300LG/AQP5/VCAM1/AMN/MYO1A/MUC17/KISS1/PDZD3/MUC13/SLC9A4/MUC1/SAPCD2/CYP4F12/CLDN4/AJAP1/SLC44A4	44
GO:0070820	tertiary granule	23/805	2.37E-07	2.09E-05	1.86E-05	PRSS3/CEACAM1/CD33/SIGLEC5/CYSTM1/NCKAP1L/LILRB2/ADGRE3/CHIT1/TCN1/ITGAX/CD53/DOK3/ITGB2/CAMP/CYBB/CLEC4D/LAIR1/CD300A/FPR1/CLEC12A/TBC1D10C/CR1	23
GO:0031225	anchored component of membrane	23/805	4.57E-07	3.36E-05	2.98E-05	PRSS22/PRSS8/CEACAM6/EFNA2/MSLN/CEACAM5/ART4/CD48/ULBP2/EFNA3/OTOA/FCGR3B/ALPP/ALPG/ALPI/DPEP2/PSCA/LY6D/RAB26/RAB3B/EFNA1/CD52/SPACA4	23
GO:0031253	cell projection membrane	32/805	4.48E-06	0.000247188	0.000219487	FGR/ITGA3/NPC1L1/CDHR2/CEACAM1/CDHR5/PLEK2/FERMT1/DOCK8/CA9/PKD2L1/SCNN1A/PLEK/ADGRE2/ACE2/EPS8L1/RAB25/CD36/KCNK1/LCP1/EPHA2/FGD2/SLC7A11/SCIMP/S100P/AMN/PLA2G4F/P2RY12/TBC1D10C/PDE6G/EPS8L3/AIF1	32
GO:0101003	ficolin-1-rich granule membrane	12/805	5.45E-06	0.000267172	0.000237231	SIGLEC5/NCKAP1L/LILRB2/ADGRE3/ITGAX/DOK3/ITGB2/CLEC4D/CD300A/FPR1/TBC1D10C/CR1	12
GO:0005902	microvillus	14/805	6.16E-06	0.000271766	0.000241311	USH1C/PLEKHG6/CDHR2/CEACAM1/CDHR5/CA9/FOXA1/MYO1G/AQP5/VCAM1/S100P/MYO1A/ANKS4B/SPN	14
GO:0070821	tertiary granule membrane	13/805	7.11E-06	0.00028488	0.000252955	CEACAM1/CD33/SIGLEC5/CYSTM1/LILRB2/ITGAX/CD53/ITGB2/CYBB/CLEC4D/LAIR1/CD300A/CLEC12A	13
GO:0005903	brush border	15/805	1.13E-05	0.000414625	0.000368159	USH1C/SCIN/NPC1L1/CDHR2/CDHR5/MYH14/PLS1/ACE2/CD36/KCNK1/SLC7A11/AMN/MYO1A/PDZD3/ANKS4B	15
GO:0043020	NADPH oxidase complex	6/805	1.66E-05	0.000562383	0.000499359	NCF4/NCF2/NCF1/CYBB/NCF1C/NCF1B	6
GO:0001891	phagocytic cup	7/805	7.99E-05	0.002202647	0.001955806	CORO1A/BIN2/LCP1/MYO1G/ARHGAP25/AIF1/TNF	7
GO:0089717	spanning component of membrane	4/805	0.001049696	0.019046148	0.016911725	NPC1L1/CDHR2/CDHR5/AJAP1	4
GO:0031526	brush border membrane	8/805	0.001296344	0.02108534	0.018722393	NPC1L1/CDHR2/CDHR5/ACE2/CD36/KCNK1/SLC7A11/AMN	8
GO:0005922	connexin complex	5/805	0.001320892	0.02108534	0.018722393	GJB1/GJB3/GJB5/GJB4/GJC2	5
GO:0032587	ruffle membrane	11/805	0.001546839	0.023522626	0.020886542	FGR/FERMT1/PLEK/ADGRE2/EPS8L1/LCP1/EPHA2/FGD2/PLA2G4F/EPS8L3/AIF1	11
GO:0005767	secondary lysosome	4/805	0.001988544	0.027993768	0.024856622	NCF4/NCF2/CRHBP/NCF1	4
GO:0031528	microvillus membrane	5/805	0.002041365	0.027993768	0.024856622	CDHR2/CEACAM1/CDHR5/CA9/S100P	5
GO:0016328	lateral plasma membrane	8/805	0.002094772	0.027993768	0.024856622	ERBB3/CEACAM1/EPCAM/PTPRO/MYO1A/GJB1/IQGAP3/CLDN4	8
GO:0045121	membrane raft	24/805	0.002623787	0.034032058	0.030218225	BTK/LCP2/PTGS2/PTPRC/HMOX1/HCK/MAG/ZAP70/CD48/SLC2A1/ACE2/CD36/CBLC/ATP1B1/MALL/MAL2/CD226/CD8A/ITGB2/SHH/BAALC/MYO1A/P2RY12/TNF	24
GO:0098857	membrane microdomain	24/805	0.002733191	0.034150005	0.030322955	BTK/LCP2/PTGS2/PTPRC/HMOX1/HCK/MAG/ZAP70/CD48/SLC2A1/ACE2/CD36/CBLC/ATP1B1/MALL/MAL2/CD226/CD8A/ITGB2/SHH/BAALC/MYO1A/P2RY12/TNF	24
GO:0030057	desmosome	5/805	0.003012857	0.035910003	0.031885717	PERP/PPL/DSG3/EVPL/PKP3	5
GO:0001772	immunological synapse	6/805	0.0031038	0.036020417	0.031983757	CORO1A/CD37/ZAP70/CD53/SCIMP/CD3E	6
GO:0031256	leading edge membrane	15/805	0.004209543	0.04680871	0.041563051	FGR/PLEK2/FERMT1/DOCK8/PLEK/ADGRE2/EPS8L1/LCP1/MYO1G/EPHA2/FGD2/SCIMP/PLA2G4F/EPS8L3/AIF1	15
GO:0005858	axonemal dynein complex	4/805	0.004288457	0.04680871	0.041563051	NME8/CCDC114/DNAH3/DNAH2	4
GO:0098589	membrane region	24/805	0.004376883	0.04680871	0.041563051	BTK/LCP2/PTGS2/PTPRC/HMOX1/HCK/MAG/ZAP70/CD48/SLC2A1/ACE2/CD36/CBLC/ATP1B1/MALL/MAL2/CD226/CD8A/ITGB2/SHH/BAALC/MYO1A/P2RY12/TNF	24
GO:0045178	basal part of cell	7/805	0.004457972	0.04680871	0.041563051	ERBB3/CEACAM1/MET/AQP5/MYO1A/P2RY12/CLDN4	7
GO:0001533	cornified envelope	8/805	0.004811943	0.049350388	0.043819893	PPL/PI3/DSG3/SCEL/SPRR3/EVPL/SPRR1B/PKP3	8
