# Supplementary material for: A Wavelet-Based Learning Model Enhances Molecular Prognosis in Pancreatic Adenocarcinoma
Source: Biomed Res Int. 2021 Oct 16;2021:7865856. doi: 10.1155/2021/7865856 (PMC8541860; doi:10.1155/2021/7865856)
Supplement: Supplementary Materials — Additional file 1: the performance comparison of the proposed method. Additional file 2: the detailed results of KEGG pathway analyses. Additional file 3: the detailed results of GO analysis on the BP term. Additional file 4: the detailed results of GO analysis on the CC term. Additional file 5: the detailed results of GO analysis on the MF term. Additional file 6: the validation of the proposed method on the STAD dataset. [file 7865856.f1.zip › Additional file 5.txt]

ID	Description	GeneRatio	pvalue	p.adjust	qvalue	geneID	Count
GO:0001216	DNA-binding transcription activator activity	38/744	2.27E-05	0.001682977	0.001468337	ISL1/POU2F2/SPI1/PITX1/TBX21/TP73/GRHL2/CEBPE/TBX15/SIX4/HNF4A/KLF5/TFEC/OTX1/IRF6/ONECUT2/TBX4/HOXC11/SOX21/OVOL2/FOXA1/FOXJ1/HNF1A/EHF/TFAP2A/CREB3L1/FOXH1/ELF3/EOMES/HNF4G/SPIC/OVOL1/FOSL1/ETV4/HOXC10/WT1/ONECUT3/HOXA10	38
GO:0003779	actin binding	35/744	0.000160885	0.007022162	0.006126585	BAIAP2L1/USH1C/SCIN/ANLN/WAS/NEBL/CEACAM1/MISP/FERMT1/CORO1A/MEFV/MYH14/COBL/CORO2A/MLPH/TNNT2/PLS1/LSP1/EPS8L1/TNS4/VILL/LCP1/MYO1G/PARVG/PSTPIP1/MYO1F/MYOM3/CGN/CCR5/MYO1A/HCLS1/EPS8L3/RCSD1/AIF1/SPIRE2	35
GO:0004175	endopeptidase activity	35/744	0.000134284	0.006227435	0.005433214	PRSS22/PRSS3/PRSS8/GZMH/RHBDL1/PRSS33/F3/KLK10/KLK8/ACE2/F12/CAPN9/TINAG/TMPRSS4/ADAMTS10/CAPN5/MMP3/RHBDL2/TMPRSS3/PRSS12/KLK6/KLK11/KLK7/HTRA4/TPSAB1/TMPRSS2/CTSE/MMP1/TPSB2/GZMM/KEL/CAPN8/PGA5/MMP12/MMP28	35
GO:0017171	serine hydrolase activity	25/744	2.82E-07	6.97E-05	6.08E-05	PRSS22/PRSS3/PRSS8/GZMH/RHBDL1/PRSS33/AADAC/F3/KLK10/KLK8/F12/TMPRSS4/MMP3/RHBDL2/TMPRSS3/PRSS12/KLK6/KLK11/KLK7/HTRA4/TPSAB1/TMPRSS2/MMP1/TPSB2/GZMM	25
GO:0008236	serine-type peptidase activity	24/744	6.92E-07	0.00010271	8.96E-05	PRSS22/PRSS3/PRSS8/GZMH/RHBDL1/PRSS33/F3/KLK10/KLK8/F12/TMPRSS4/MMP3/RHBDL2/TMPRSS3/PRSS12/KLK6/KLK11/KLK7/HTRA4/TPSAB1/TMPRSS2/MMP1/TPSB2/GZMM	24
GO:0004252	serine-type endopeptidase activity	24/744	5.98E-08	4.44E-05	3.87E-05	PRSS22/PRSS3/PRSS8/GZMH/RHBDL1/PRSS33/F3/KLK10/KLK8/F12/TMPRSS4/MMP3/RHBDL2/TMPRSS3/PRSS12/KLK6/KLK11/KLK7/HTRA4/TPSAB1/TMPRSS2/MMP1/TPSB2/GZMM	24
GO:0140375	immune receptor activity	20/744	3.83E-07	7.11E-05	6.20E-05	IL20RA/FCGR2B/IL21R/LILRB1/EBI3/IL10RA/IL18RAP/F3/CSF3R/CCR2/LILRB2/IL22RA1/KLRF1/CCR5/CCR1/CX3CR1/CXCR6/GPR35/CR1/IFNAR2	20
GO:0043177	organic acid binding	19/744	0.001075369	0.02955272	0.025783689	CD22/HNF4A/CEMIP/CD33/MAG/PCK1/GAD1/APOC1/DDC/STAB2/CRABP2/HAPLN1/ALAS2/SIGLEC11/HBA2/HBA1/UGT1A1/UGT1A8/GRIN2B	19
GO:0051015	actin filament binding	18/744	0.001786051	0.03681249	0.032117579	USH1C/SCIN/WAS/NEBL/MISP/FERMT1/CORO1A/MYH14/CORO2A/PLS1/VILL/LCP1/PSTPIP1/MYOM3/MYO1A/HCLS1/RCSD1/AIF1	18
GO:0016298	lipase activity	13/744	0.002675669	0.048122373	0.041985047	PLA2G10/HMOX1/AADAC/PLCH1/PLAAT2/PLCB2/PLA2G7/CCR5/PLCD3/CCR1/LIPH/PLD4/PLA2G4F	13
GO:0048020	CCR chemokine receptor binding	8/744	0.000368982	0.013082864	0.01141433	CCL2/CCR2/CCL4/CCL15/CCL4L1/CCL3L1/CCL3L3/CCL14	8
GO:0042287	MHC protein binding	7/744	0.001251838	0.030187037	0.026337108	LILRB1/CD244/LILRB2/MARCHF1/CD8A/CLEC7A/FCRL6	7
GO:0098641	cadherin binding involved in cell-cell adhesion	6/744	9.18E-05	0.004862773	0.004242595	BAIAP2L1/KRT18/EPCAM/TRIM29/BAIAP2/PKP3	6
GO:0019865	immunoglobulin binding	5/744	0.002829457	0.048122373	0.041985047	CD22/FCGR2B/FCGR3B/FCGR3A/LILRA2	5
GO:0016502	nucleotide receptor activity	5/744	0.00150364	0.032814731	0.028629677	P2RX7/GPR87/P2RY12/GPR34/P2RY13	5
GO:0001614	purinergic nucleotide receptor activity	5/744	0.00150364	0.032814731	0.028629677	P2RX7/GPR87/P2RY12/GPR34/P2RY13	5
GO:0030246	carbohydrate binding	29/744	3.97E-06	0.000491428	0.000428753	CD22/CHI3L2/CD33/SIGLEC5/MAG/KLRB1/SIGLEC9/CHI3L1/REG4/GALNT5/CD72/TINAG/LMAN1L/SIGLEC10/KLRF1/HK3/SIGLEC11/ZG16B/CLEC1B/CLEC4E/CLEC4D/SIGLEC7/LGALS4/CLEC7A/CLEC12A/CRYBG2/CLECL1/CLEC17A/CLEC12B	29
GO:0004896	cytokine receptor activity	15/744	1.08E-05	0.001144629	0.000998647	IL20RA/IL21R/EBI3/IL10RA/IL18RAP/F3/CSF3R/CCR2/IL22RA1/CCR5/CCR1/CX3CR1/CXCR6/GPR35/IFNAR2	15
GO:0042379	chemokine receptor binding	12/744	1.70E-05	0.001578557	0.001377235	CCL2/PF4V1/CCR2/CXCL6/TFF2/S100A14/CCL4/CCL15/CCL4L1/CCL3L1/CCL3L3/CCL14	12
GO:0001228	DNA-binding transcription activator activity, RNA polymerase II-specific	38/744	2.16E-05	0.001682977	0.001468337	ISL1/POU2F2/SPI1/PITX1/TBX21/TP73/GRHL2/CEBPE/TBX15/SIX4/HNF4A/KLF5/TFEC/OTX1/IRF6/ONECUT2/TBX4/HOXC11/SOX21/OVOL2/FOXA1/FOXJ1/HNF1A/EHF/TFAP2A/CREB3L1/FOXH1/ELF3/EOMES/HNF4G/SPIC/OVOL1/FOSL1/ETV4/HOXC10/WT1/ONECUT3/HOXA10	38
GO:0016176	superoxide-generating NADPH oxidase activator activity	5/744	2.74E-05	0.001847205	0.00161162	NCF4/NCF2/NCF1/NCF1C/NCF1B	5
GO:0050664	oxidoreductase activity, acting on NAD(P)H, oxygen as acceptor	6/744	4.50E-05	0.0027815	0.002426759	NCF2/KMO/NCF1/CYBB/NCF1C/NCF1B	6
GO:0016175	superoxide-generating NADPH oxidase activity	5/744	8.02E-05	0.004578113	0.003994239	NCF2/NCF1/CYBB/NCF1C/NCF1B	5
GO:0005543	phospholipid binding	35/744	0.000134284	0.006227435	0.005433214	SCIN/BTK/SYT13/PLA2G10/SNX10/NCF4/PLEK2/RUBCNL/ANXA13/CEACAM5/ANXA10/BIN2/PLEK/F3/ARHGAP9/SDCBP2/BAIAP2L2/APOE/APOC1/MYO1G/NR5A1/GRB7/PLA2G7/FGD2/SYTL5/SYT8/NCF1/NCF1C/SNX20/CD300A/PLA2G4F/RASGRP1/GRAMD2A/NCF1B/CD300LF	35
GO:0008009	chemokine activity	9/744	0.000177216	0.007305248	0.006373567	CCL2/PF4V1/CXCL6/CCL4/CCL15/CCL4L1/CCL3L1/CCL3L3/CCL14	9
GO:0005044	scavenger receptor activity	9/744	0.000243466	0.009507976	0.008295369	CD5L/CD36/STAB2/TINAG/TMPRSS4/TMPRSS3/PRSS12/TMPRSS2/DMBT1	9
GO:0005154	epidermal growth factor receptor binding	7/744	0.00037027	0.013082864	0.01141433	AGR2/AREG/EREG/VAV3/CBLC/FAM83B/BTC	7
GO:0005125	cytokine activity	21/744	0.000407768	0.013752893	0.011998907	EBI3/TNFSF8/CCL2/PF4V1/AREG/CXCL6/LIF/GDF15/LEFTY2/GDF7/IL34/SCG2/FAM3D/LTB/TNF/CCL4/CCL15/CCL4L1/CCL3L1/CCL3L3/CCL14	21
GO:0004713	protein tyrosine kinase activity	15/744	0.000515972	0.016645709	0.014522785	FGR/MATK/BTK/STYK1/ERBB3/PTK6/HCK/MET/ZAP70/EPHA2/EFNA3/SLA/MST1R/CSF1R/EPHB3	15
GO:0004715	non-membrane spanning protein tyrosine kinase activity	8/744	0.000594176	0.017274328	0.015071233	FGR/MATK/BTK/STYK1/PTK6/HCK/ZAP70/SLA	8
GO:0004950	chemokine receptor activity	6/744	0.0006053	0.017274328	0.015071233	CCR2/CCR5/CCR1/CX3CR1/CXCR6/GPR35	6
GO:0033691	sialic acid binding	4/744	0.00117054	0.030110949	0.026270725	CD22/CD33/MAG/SIGLEC11	4
GO:0038024	cargo receptor activity	10/744	0.001261183	0.030187037	0.026337108	CD5L/CD36/STAB2/TINAG/TMPRSS4/TMPRSS3/ITGB2/PRSS12/TMPRSS2/DMBT1	10
GO:0043325	phosphatidylinositol-3,4-bisphosphate binding	6/744	0.001352871	0.031369704	0.027368943	PLEK2/PLEK/MYO1G/NCF1/NCF1C/NCF1B	6
GO:0019956	chemokine binding	6/744	0.001922429	0.038552491	0.033635667	ITGA4/CCR2/CCR5/CCR1/CX3CR1/CXCR6	6
GO:0045028	G protein-coupled purinergic nucleotide receptor activity	4/744	0.0022132	0.043215638	0.037704096	GPR87/P2RY12/GPR34/P2RY13	4
GO:0016493	C-C chemokine receptor activity	5/744	0.002319194	0.044124158	0.038496747	CCR2/CCR5/CCR1/CX3CR1/CXCR6	5
GO:0019957	C-C chemokine binding	5/744	0.002829457	0.048122373	0.041985047	CCR2/CCR5/CCR1/CX3CR1/CXCR6	5
GO:0019955	cytokine binding	13/744	0.00286673	0.048122373	0.041985047	IL20RA/EBI3/IL10RA/ITGA4/CSF3R/CCR2/CD36/IL22RA1/CCR5/CCR1/CX3CR1/CXCR6/CSF1R	13
GO:0005243	gap junction channel activity	4/744	0.002918473	0.048122373	0.041985047	GJB1/GJB3/GJB4/GJC2	4
GO:0008381	mechanosensitive ion channel activity	4/744	0.002918473	0.048122373	0.041985047	TMC5/TMC4/TMC8/TMC7	4
GO:0016209	antioxidant activity	10/744	0.003215774	0.049863737	0.043504325	MGST1/IYD/GSTO2/PTGS2/TPO/APOE/GPX2/NQO1/HBA2/HBA1	10
GO:0046906	tetrapyrrole binding	14/744	0.003216842	0.049863737	0.043504325	PTGS2/HMOX1/FA2H/CYP3A5/CYP2C18/TPO/TCN1/CYP2C9/CYP3A4/CYBB/CYP4F12/CYP4F3/HBA2/HBA1	14
GO:0031406	carboxylic acid binding	17/744	0.003283086	0.049863737	0.043504325	CD22/HNF4A/CEMIP/CD33/MAG/PCK1/GAD1/APOC1/DDC/STAB2/CRABP2/HAPLN1/ALAS2/SIGLEC11/UGT1A1/UGT1A8/GRIN2B	17
GO:1901981	phosphatidylinositol phosphate binding	15/744	0.003292888	0.049863737	0.043504325	SCIN/BTK/NCF4/PLEK2/RUBCNL/PLEK/ARHGAP9/SDCBP2/MYO1G/FGD2/NCF1/NCF1C/SNX20/GRAMD2A/NCF1B	15
